# Supplementary material for: A decade of genomic surveillance tracks the disappearance and reintroduction of seasonal influenza virus in Aotearoa New Zealand
Source: Research Square preprint supplement (doi:10.21203/rs.3.rs-7503135/v1), 2025-09-03
Supplement: Supplementary file 1 [file 5b360505edbba25e45d0fef6.xlsx]

## Sheet: Sheet1
A(H1N1)09pdm	A(H3N2)	B/Victoria	B/Yamagata
EPIISL10824659	EPIISL10492890	EPIISL1034776	EPIISL134231
EPIISL11888017	EPIISL10493032	EPIISL10492308	EPIISL134813
EPIISL12177624	EPIISL10802954	EPIISL1055766	EPIISL134853
EPIISL12354125	EPIISL10827390	EPIISL1064162	EPIISL135024
EPIISL12429477	EPIISL10827660	EPIISL10826500	EPIISL135158
EPIISL12429561	EPIISL10828155	EPIISL1180160	EPIISL135203
EPIISL12580021	EPIISL11041930	EPIISL12219751	EPIISL136476
EPIISL12850475	EPIISL11309969	EPIISL12241660	EPIISL136716
EPIISL12850605	EPIISL11400793	EPIISL12429523	EPIISL136728
EPIISL1290937	EPIISL11407115	EPIISL12579822	EPIISL137248
EPIISL12973156	EPIISL11449482	EPIISL12709831	EPIISL137264
EPIISL13046492	EPIISL11449486	EPIISL12709844	EPIISL138377
EPIISL13096515	EPIISL11532849	EPIISL12709854	EPIISL138386
EPIISL13399728	EPIISL11532895	EPIISL1296469	EPIISL138391
EPIISL13503237	EPIISL11532901	EPIISL13017117	EPIISL138395
EPIISL136359	EPIISL11533876	EPIISL13096517	EPIISL138398
EPIISL1368318	EPIISL11872665	EPIISL134809	EPIISL138407
EPIISL13704302	EPIISL11872996	EPIISL134810	EPIISL138423
EPIISL138627	EPIISL11873046	EPIISL135143	EPIISL138581
EPIISL138661	EPIISL11958391	EPIISL13835111	EPIISL138798
EPIISL138727	EPIISL11958698	EPIISL138363	EPIISL138949
EPIISL13885595	EPIISL11999535	EPIISL138368	EPIISL139574
EPIISL139604	EPIISL12107431	EPIISL138567	EPIISL139576
EPIISL139616	EPIISL12219475	EPIISL138778	EPIISL139889
EPIISL13983917	EPIISL12323485	EPIISL138959	EPIISL139929
EPIISL13984017	EPIISL12353484	EPIISL139583	EPIISL141613
EPIISL139898	EPIISL12422445	EPIISL139935	EPIISL142185
EPIISL14115663	EPIISL12641714	EPIISL140295	EPIISL142605
EPIISL14145021	EPIISL12710484	EPIISL14033248	EPIISL143594
EPIISL14161792	EPIISL12713422	EPIISL14033262	EPIISL143727
EPIISL142157	EPIISL12713523	EPIISL14033365	EPIISL143976
EPIISL143144	EPIISL12713961	EPIISL14033389	EPIISL144528
EPIISL143242	EPIISL12713994	EPIISL14033398	EPIISL144651
EPIISL144294	EPIISL12730174	EPIISL14033414	EPIISL144813
EPIISL14467566	EPIISL12809070	EPIISL14033444	EPIISL144840
EPIISL145089	EPIISL12869963	EPIISL14033448	EPIISL144855
EPIISL145522	EPIISL12942268	EPIISL14033449	EPIISL145043
EPIISL145525	EPIISL13017104	EPIISL14033458	EPIISL145329
EPIISL145635	EPIISL13027985	EPIISL14033489	EPIISL145333
EPIISL14569519	EPIISL13044318	EPIISL14033506	EPIISL145576
EPIISL146064	EPIISL13053857	EPIISL14033518	EPIISL145590
EPIISL14648766	EPIISL13054987	EPIISL14033533	EPIISL145983
EPIISL14649633	EPIISL13055001	EPIISL14033544	EPIISL145986
EPIISL147504	EPIISL13148861	EPIISL14033569	EPIISL146069
EPIISL14759174	EPIISL13175665	EPIISL14033646	EPIISL146078
EPIISL14759184	EPIISL13202135	EPIISL14033652	EPIISL148709
EPIISL14816454	EPIISL13284036	EPIISL14033674	EPIISL148711
EPIISL14819747	EPIISL13284199	EPIISL14212834	EPIISL150207
EPIISL14819780	EPIISL13284254	EPIISL14212850	EPIISL150234
EPIISL148604	EPIISL13284278	EPIISL142893	EPIISL150538
EPIISL14870870	EPIISL13284300	EPIISL14333266	EPIISL15084589
EPIISL14925761	EPIISL13284312	EPIISL143963	EPIISL15146360
EPIISL149735	EPIISL13284589	EPIISL14456635	EPIISL15146525
EPIISL150443	EPIISL13285195	EPIISL145581	EPIISL151480
EPIISL15083870	EPIISL13291833	EPIISL145966	EPIISL151556
EPIISL15146395	EPIISL13300455	EPIISL145992	EPIISL15156726
EPIISL151500	EPIISL13301384	EPIISL146084	EPIISL151580
EPIISL151523	EPIISL13339927	EPIISL14755419	EPIISL151591
EPIISL151585	EPIISL13344428	EPIISL14818823	EPIISL153265
EPIISL151904	EPIISL13390325	EPIISL14862195	EPIISL153506
EPIISL15260061	EPIISL13431216	EPIISL14862201	EPIISL154219
EPIISL152906	EPIISL13431251	EPIISL14955143	EPIISL154994
EPIISL152929	EPIISL13431265	EPIISL14991627	EPIISL155599
EPIISL152934	EPIISL134842	EPIISL15025172	EPIISL158884
EPIISL153032	EPIISL13503252	EPIISL15081659	EPIISL159056
EPIISL153072	EPIISL13560702	EPIISL15084583	EPIISL159139
EPIISL153352	EPIISL13638363	EPIISL15084624	EPIISL159599
EPIISL15364175	EPIISL13655716	EPIISL15146494	EPIISL159706
EPIISL154713	EPIISL13795253	EPIISL15146530	EPIISL160758
EPIISL154796	EPIISL13795273	EPIISL151533	EPIISL160761
EPIISL155026	EPIISL13812730	EPIISL151535	EPIISL162368
EPIISL15544296	EPIISL13812750	EPIISL1519547	EPIISL162984
EPIISL155856	EPIISL13812808	EPIISL15286760	EPIISL163178
EPIISL155862	EPIISL13812823	EPIISL153523	EPIISL163202
EPIISL155938	EPIISL13812837	EPIISL153873	EPIISL163772
EPIISL155942	EPIISL13892682	EPIISL15427378	EPIISL164145
EPIISL156541	EPIISL13892699	EPIISL15503767	EPIISL164160
EPIISL156577	EPIISL13896371	EPIISL15503773	EPIISL164270
EPIISL156824	EPIISL13896373	EPIISL15503775	EPIISL164311
EPIISL157048	EPIISL13896374	EPIISL157842	EPIISL164333
EPIISL157108	EPIISL13896575	EPIISL15837646	EPIISL165448
EPIISL15714661	EPIISL13897362	EPIISL158882	EPIISL165473
EPIISL15728497	EPIISL13957746	EPIISL15927686	EPIISL165490
EPIISL15728523	EPIISL13957781	EPIISL15927721	EPIISL165841
EPIISL15740758	EPIISL14027401	EPIISL15929432	EPIISL165847
EPIISL15740941	EPIISL14033278	EPIISL15929443	EPIISL166020
EPIISL157415	EPIISL14036173	EPIISL15980875	EPIISL166261
EPIISL157488	EPIISL140424	EPIISL15980880	EPIISL166763
EPIISL157498	EPIISL140724	EPIISL15980916	EPIISL166765
EPIISL157520	EPIISL14077638	EPIISL15980920	EPIISL166949
EPIISL15800980	EPIISL14078284	EPIISL16003456	EPIISL168054
EPIISL15803841	EPIISL14094112	EPIISL16054273	EPIISL168062
EPIISL15803855	EPIISL140994	EPIISL16075796	EPIISL168068
EPIISL158180	EPIISL14116579	EPIISL16173543	EPIISL168392
EPIISL158732	EPIISL14144976	EPIISL16182347	EPIISL168683
EPIISL158791	EPIISL14145073	EPIISL16182349	EPIISL168693
EPIISL15888907	EPIISL14145074	EPIISL16350717	EPIISL168806
EPIISL15898442	EPIISL14225335	EPIISL16350775	EPIISL168809
EPIISL15911899	EPIISL14225336	EPIISL16376436	EPIISL168952
EPIISL159240	EPIISL14259745	EPIISL163838	EPIISL169076
EPIISL15926910	EPIISL14326690	EPIISL16390407	EPIISL169600
EPIISL15928411	EPIISL14328725	EPIISL164276	EPIISL169780
EPIISL15928555	EPIISL14333092	EPIISL16458978	EPIISL169784
EPIISL15929455	EPIISL14333094	EPIISL16459147	EPIISL169883
EPIISL15937900	EPIISL14333139	EPIISL16494717	EPIISL169888
EPIISL159880	EPIISL144026	EPIISL16504389	EPIISL169891
EPIISL16003429	EPIISL14426949	EPIISL16520533	EPIISL169898
EPIISL16007638	EPIISL14456513	EPIISL16520534	EPIISL170066
EPIISL16138955	EPIISL14498401	EPIISL16520538	EPIISL170174
EPIISL16182342	EPIISL14509062	EPIISL165487	EPIISL17037629
EPIISL16183456	EPIISL14509076	EPIISL165489	EPIISL17049055
EPIISL16199399	EPIISL14572752	EPIISL16567337	EPIISL17053926
EPIISL16199529	EPIISL14648467	EPIISL165864	EPIISL171561
EPIISL16199531	EPIISL14648479	EPIISL16613709	EPIISL171802
EPIISL16199576	EPIISL14649036	EPIISL166206	EPIISL171965
EPIISL16199704	EPIISL14649044	EPIISL16632529	EPIISL171975
EPIISL162093	EPIISL14653591	EPIISL16633776	EPIISL172219
EPIISL162400	EPIISL14660139	EPIISL166911	EPIISL172291
EPIISL162414	EPIISL14660264	EPIISL16714036	EPIISL172296
EPIISL16260122	EPIISL14712410	EPIISL16744208	EPIISL172656
EPIISL162726	EPIISL14788309	EPIISL16761664	EPIISL172909
EPIISL16283190	EPIISL14794821	EPIISL16761706	EPIISL173016
EPIISL16283278	EPIISL14794991	EPIISL16761726	EPIISL173330
EPIISL16283297	EPIISL14797485	EPIISL16761733	EPIISL173339
EPIISL16283386	EPIISL147992	EPIISL16761741	EPIISL17371529
EPIISL16299311	EPIISL14819770	EPIISL16761755	EPIISL173761
EPIISL16299315	EPIISL14846183	EPIISL16807588	EPIISL173767
EPIISL163017	EPIISL14846215	EPIISL16809975	EPIISL173775
EPIISL163022	EPIISL14846336	EPIISL16828721	EPIISL173779
EPIISL163032	EPIISL14846369	EPIISL16828752	EPIISL173802
EPIISL16308863	EPIISL14846548	EPIISL16830317	EPIISL173807
EPIISL16311746	EPIISL14853316	EPIISL16830667	EPIISL173818
EPIISL16311748	EPIISL14862597	EPIISL16830674	EPIISL173831
EPIISL16333951	EPIISL14871218	EPIISL16830687	EPIISL173875
EPIISL16333981	EPIISL148742	EPIISL16830709	EPIISL174523
EPIISL163628	EPIISL14906677	EPIISL16830752	EPIISL175104
EPIISL163831	EPIISL14906743	EPIISL16878770	EPIISL175144
EPIISL16390319	EPIISL14920977	EPIISL16878771	EPIISL175152
EPIISL16401631	EPIISL14923305	EPIISL168821	EPIISL1760118
EPIISL16454648	EPIISL14923983	EPIISL16886702	EPIISL176423
EPIISL16460703	EPIISL14925893	EPIISL169166	EPIISL177065
EPIISL16465049	EPIISL14925977	EPIISL169178	EPIISL177193
EPIISL16465071	EPIISL14927025	EPIISL16946990	EPIISL177200
EPIISL16485976	EPIISL14927041	EPIISL16997750	EPIISL177230
EPIISL16494795	EPIISL14928725	EPIISL17037627	EPIISL177441
EPIISL165202	EPIISL14930519	EPIISL17049212	EPIISL178037
EPIISL16524625	EPIISL14991265	EPIISL17057003	EPIISL178047
EPIISL16526293	EPIISL15082418	EPIISL17057009	EPIISL178052
EPIISL16541963	EPIISL15138982	EPIISL17089389	EPIISL178209
EPIISL16547510	EPIISL15140887	EPIISL17102592	EPIISL178210
EPIISL165653	EPIISL15146262	EPIISL17102611	EPIISL178216
EPIISL166024	EPIISL15146370	EPIISL17102683	EPIISL179177
EPIISL166064	EPIISL151795	EPIISL171798	EPIISL179460
EPIISL166098	EPIISL152025	EPIISL171958	EPIISL179672
EPIISL16619603	EPIISL15210614	EPIISL17212532	EPIISL181235
EPIISL16650034	EPIISL15393521	EPIISL17212609	EPIISL181475
EPIISL16650097	EPIISL15447160	EPIISL17212628	EPIISL181771
EPIISL166784	EPIISL155887	EPIISL17225641	EPIISL182156
EPIISL16679041	EPIISL156395	EPIISL17225666	EPIISL182680
EPIISL16679411	EPIISL157040	EPIISL17225790	EPIISL182687
EPIISL16714059	EPIISL157091	EPIISL17225805	EPIISL182716
EPIISL16733610	EPIISL15714652	EPIISL17225837	EPIISL18787782
EPIISL16733796	EPIISL15715007	EPIISL172309	EPIISL18787791
EPIISL16737096	EPIISL15724035	EPIISL1732538	EPIISL18787818
EPIISL16740622	EPIISL15724437	EPIISL17395347	EPIISL18989218
EPIISL16740626	EPIISL15724940	EPIISL17465745	EPIISL18999053
EPIISL16740652	EPIISL15728566	EPIISL17503691	EPIISL19029297
EPIISL16745141	EPIISL15806343	EPIISL17623474	EPIISL19029332
EPIISL16749078	EPIISL15833317	EPIISL17700618	EPIISL19029337
EPIISL167577	EPIISL15837653	EPIISL17718208	EPIISL190337
EPIISL16761645	EPIISL158829	EPIISL17729486	EPIISL190859
EPIISL16761804	EPIISL15888899	EPIISL17776886	EPIISL190861
EPIISL16761818	EPIISL15928840	EPIISL17806182	EPIISL190867
EPIISL16761843	EPIISL159617	EPIISL178194	EPIISL190869
EPIISL16761845	EPIISL15992157	EPIISL17975838	EPIISL190877
EPIISL16764155	EPIISL15999247	EPIISL17996177	EPIISL190971
EPIISL16764821	EPIISL15999279	EPIISL17996194	EPIISL190997
EPIISL16765014	EPIISL15999283	EPIISL17996202	EPIISL191021
EPIISL167659	EPIISL16023346	EPIISL18000786	EPIISL191454
EPIISL167682	EPIISL16024335	EPIISL18007286	EPIISL191558
EPIISL167685	EPIISL16024366	EPIISL18044621	EPIISL191893
EPIISL16810006	EPIISL16054069	EPIISL18167080	EPIISL191901
EPIISL16811015	EPIISL161269	EPIISL18167087	EPIISL191921
EPIISL16822922	EPIISL161323	EPIISL18167094	EPIISL191925
EPIISL16830511	EPIISL16147023	EPIISL182731	EPIISL19226210
EPIISL16830522	EPIISL16181440	EPIISL182741	EPIISL192513
EPIISL16831302	EPIISL16181683	EPIISL18623927	EPIISL192669
EPIISL16833147	EPIISL16199740	EPIISL18709791	EPIISL192676
EPIISL16833150	EPIISL16200948	EPIISL18713767	EPIISL192971
EPIISL16833436	EPIISL16201061	EPIISL18713773	EPIISL192980
EPIISL16834419	EPIISL16201354	EPIISL18713781	EPIISL193045
EPIISL16834525	EPIISL16201370	EPIISL18787771	EPIISL193251
EPIISL16834670	EPIISL16201424	EPIISL18847276	EPIISL193259
EPIISL16834681	EPIISL16201485	EPIISL18898213	EPIISL193279
EPIISL168601	EPIISL16201565	EPIISL18898216	EPIISL193610
EPIISL16869663	EPIISL16201994	EPIISL18926564	EPIISL193633
EPIISL16872416	EPIISL16212174	EPIISL18989240	EPIISL194556
EPIISL16872458	EPIISL162141	EPIISL18999116	EPIISL194600
EPIISL16872617	EPIISL16258241	EPIISL19029272	EPIISL194607
EPIISL168845	EPIISL16283342	EPIISL19071032	EPIISL194874
EPIISL16886741	EPIISL16283371	EPIISL19071303	EPIISL194889
EPIISL16886784	EPIISL16283376	EPIISL19084576	EPIISL195506
EPIISL16886832	EPIISL16333172	EPIISL19084578	EPIISL195507
EPIISL168870	EPIISL16333237	EPIISL19107783	EPIISL195695
EPIISL16957193	EPIISL163663	EPIISL19107996	EPIISL195721
EPIISL16970330	EPIISL164230	EPIISL191886	EPIISL195785
EPIISL16975003	EPIISL164436	EPIISL193079	EPIISL195789
EPIISL16978370	EPIISL16459644	EPIISL193237	EPIISL196584
EPIISL169877	EPIISL16465186	EPIISL194558	EPIISL197079
EPIISL17038035	EPIISL16465245	EPIISL195477	EPIISL197397
EPIISL17053853	EPIISL164652	EPIISL195676	EPIISL197443
EPIISL17053873	EPIISL16477482	EPIISL196589	EPIISL197476
EPIISL17053908	EPIISL16491557	EPIISL197383	EPIISL200628
EPIISL17054012	EPIISL164940	EPIISL197393	EPIISL200787
EPIISL17054122	EPIISL164954	EPIISL199488	EPIISL201918
EPIISL17063075	EPIISL16520202	EPIISL203272	EPIISL202479
EPIISL17072309	EPIISL16520486	EPIISL203349	EPIISL202490
EPIISL17072653	EPIISL16520520	EPIISL203365	EPIISL202499
EPIISL17086358	EPIISL16559103	EPIISL203514	EPIISL203334
EPIISL170987	EPIISL16559179	EPIISL205707	EPIISL203341
EPIISL17102774	EPIISL165622	EPIISL205718	EPIISL203383
EPIISL171563	EPIISL165661	EPIISL207236	EPIISL205299
EPIISL171579	EPIISL165827	EPIISL207597	EPIISL205799
EPIISL171771	EPIISL16608853	EPIISL211617	EPIISL206907
EPIISL17185944	EPIISL16613684	EPIISL211630	EPIISL206925
EPIISL171895	EPIISL16616060	EPIISL211754	EPIISL207244
EPIISL17211605	EPIISL16631956	EPIISL211892	EPIISL207251
EPIISL172649	EPIISL16650127	EPIISL212546	EPIISL207323
EPIISL172840	EPIISL166720	EPIISL212797	EPIISL207581
EPIISL17306124	EPIISL16679469	EPIISL212838	EPIISL207585
EPIISL17464494	EPIISL16680805	EPIISL213293	EPIISL208367
EPIISL174971	EPIISL16681981	EPIISL213297	EPIISL210375
EPIISL175255	EPIISL16706635	EPIISL213315	EPIISL211609
EPIISL17634409	EPIISL16744248	EPIISL213870	EPIISL211615
EPIISL17635547	EPIISL16744254	EPIISL214259	EPIISL212692
EPIISL17635662	EPIISL16745039	EPIISL214321	EPIISL212816
EPIISL17635696	EPIISL16745085	EPIISL215749	EPIISL212866
EPIISL17635839	EPIISL16745136	EPIISL215939	EPIISL212905
EPIISL17635849	EPIISL16748988	EPIISL216295	EPIISL212918
EPIISL17635865	EPIISL16749467	EPIISL216341	EPIISL212942
EPIISL17635988	EPIISL16749903	EPIISL216485	EPIISL212950
EPIISL17636107	EPIISL16750949	EPIISL216531	EPIISL213496
EPIISL17636150	EPIISL16750976	EPIISL216828	EPIISL213505
EPIISL17636155	EPIISL16755620	EPIISL216986	EPIISL213637
EPIISL17636213	EPIISL16755699	EPIISL217589	EPIISL214298
EPIISL17636238	EPIISL16755730	EPIISL217854	EPIISL214307
EPIISL17636344	EPIISL16757441	EPIISL217887	EPIISL214331
EPIISL17636348	EPIISL16759896	EPIISL217890	EPIISL214335
EPIISL17636389	EPIISL16763899	EPIISL217895	EPIISL215684
EPIISL17636432	EPIISL16763928	EPIISL217900	EPIISL216062
EPIISL17636499	EPIISL167836	EPIISL218617	EPIISL217501
EPIISL17636522	EPIISL167940	EPIISL218626	EPIISL217516
EPIISL17636646	EPIISL16810188	EPIISL218644	EPIISL217543
EPIISL17672758	EPIISL16810999	EPIISL218655	EPIISL217555
EPIISL17674710	EPIISL168126	EPIISL218675	EPIISL217564
EPIISL17680667	EPIISL16822647	EPIISL218811	EPIISL217603
EPIISL17680677	EPIISL16822723	EPIISL218820	EPIISL217635
EPIISL177068	EPIISL16836624	EPIISL218830	EPIISL217657
EPIISL17712176	EPIISL16836707	EPIISL218862	EPIISL217740
EPIISL17712194	EPIISL16837166	EPIISL218870	EPIISL217789
EPIISL177861	EPIISL16854267	EPIISL219061	EPIISL217802
EPIISL17804649	EPIISL16854710	EPIISL219707	EPIISL217850
EPIISL17805825	EPIISL16856248	EPIISL220663	EPIISL217911
EPIISL17805953	EPIISL16856522	EPIISL220790	EPIISL218700
EPIISL178110	EPIISL16856536	EPIISL220795	EPIISL218758
EPIISL17813994	EPIISL16857329	EPIISL221331	EPIISL218905
EPIISL17813999	EPIISL16868795	EPIISL221388	EPIISL219043
EPIISL17820319	EPIISL16872540	EPIISL221693	EPIISL219317
EPIISL17831601	EPIISL16872647	EPIISL222320	EPIISL220587
EPIISL178758	EPIISL16894965	EPIISL222326	EPIISL220593
EPIISL178917	EPIISL16914530	EPIISL222355	EPIISL220660
EPIISL179220	EPIISL16920143	EPIISL222367	EPIISL220687
EPIISL179248	EPIISL16925176	EPIISL222893	EPIISL220688
EPIISL179596	EPIISL16935788	EPIISL223009	EPIISL220699
EPIISL17988327	EPIISL16935790	EPIISL223048	EPIISL220717
EPIISL17995432	EPIISL16957211	EPIISL223053	EPIISL220725
EPIISL18005664	EPIISL16957213	EPIISL223395	EPIISL220735
EPIISL18011073	EPIISL16957239	EPIISL223410	EPIISL220767
EPIISL18037481	EPIISL169678	EPIISL223419	EPIISL220779
EPIISL18054098	EPIISL16970451	EPIISL223424	EPIISL220809
EPIISL18076794	EPIISL16984537	EPIISL223445	EPIISL220816
EPIISL18107033	EPIISL17019030	EPIISL223482	EPIISL220820
EPIISL18120016	EPIISL17037846	EPIISL223692	EPIISL220824
EPIISL18624004	EPIISL17037852	EPIISL223707	EPIISL220894
EPIISL18624014	EPIISL170445	EPIISL223871	EPIISL221552
EPIISL18624017	EPIISL17065815	EPIISL224249	EPIISL222306
EPIISL18624051	EPIISL170693	EPIISL224252	EPIISL222314
EPIISL18728086	EPIISL17100574	EPIISL224255	EPIISL222334
EPIISL18755584	EPIISL171761	EPIISL224256	EPIISL222366
EPIISL18781933	EPIISL171785	EPIISL224308	EPIISL222374
EPIISL18786564	EPIISL171815	EPIISL224403	EPIISL222394
EPIISL18786589	EPIISL171881	EPIISL224440	EPIISL222768
EPIISL18981551	EPIISL17244483	EPIISL2245051	EPIISL222813
EPIISL18981564	EPIISL17287364	EPIISL2245944	EPIISL222846
EPIISL18989204	EPIISL173051	EPIISL2245975	EPIISL222911
EPIISL19028887	EPIISL17306134	EPIISL224599	EPIISL222914
EPIISL19028889	EPIISL173257	EPIISL2246050	EPIISL222951
EPIISL19029008	EPIISL17368532	EPIISL225243	EPIISL222952
EPIISL19029011	EPIISL173990	EPIISL225245	EPIISL222988
EPIISL19029227	EPIISL17401935	EPIISL225281	EPIISL223004
EPIISL19072318	EPIISL17409329	EPIISL2258278	EPIISL223028
EPIISL19072393	EPIISL174156	EPIISL2258315	EPIISL223054
EPIISL191264	EPIISL17454541	EPIISL225831	EPIISL223748
EPIISL191661	EPIISL174679	EPIISL2258357	EPIISL223756
EPIISL19191169	EPIISL17503339	EPIISL2259577	EPIISL225160
EPIISL192061	EPIISL17505354	EPIISL226463	EPIISL225187
EPIISL192113	EPIISL17505360	EPIISL226464	EPIISL225213
EPIISL192538	EPIISL17505366	EPIISL227623	EPIISL225262
EPIISL192543	EPIISL17505369	EPIISL229953	EPIISL225383
EPIISL192550	EPIISL175159	EPIISL229961	EPIISL225385
EPIISL199501	EPIISL175229	EPIISL229966	EPIISL225386
EPIISL201759	EPIISL175307	EPIISL2305551	EPIISL225392
EPIISL202778	EPIISL17536797	EPIISL230566	EPIISL225404
EPIISL202948	EPIISL17536803	EPIISL2305677	EPIISL225412
EPIISL202980	EPIISL17536820	EPIISL2307365	EPIISL226455
EPIISL202983	EPIISL17545263	EPIISL2307369	EPIISL226456
EPIISL202990	EPIISL175505	EPIISL231553	EPIISL226499
EPIISL203073	EPIISL17550989	EPIISL231702	EPIISL226544
EPIISL203291	EPIISL17551570	EPIISL231706	EPIISL226547
EPIISL205498	EPIISL17551781	EPIISL231720	EPIISL227616
EPIISL205892	EPIISL17597918	EPIISL231734	EPIISL229245
EPIISL206031	EPIISL176658	EPIISL231957	EPIISL229408
EPIISL207132	EPIISL17681660	EPIISL231999	EPIISL229941
EPIISL207133	EPIISL17692307	EPIISL232035	EPIISL2307359
EPIISL207213	EPIISL17694157	EPIISL232295	EPIISL231983
EPIISL207509	EPIISL17699899	EPIISL232915	EPIISL232251
EPIISL207756	EPIISL177417	EPIISL233154	EPIISL232324
EPIISL207915	EPIISL177418	EPIISL233186	EPIISL232343
EPIISL208287	EPIISL177642	EPIISL233188	EPIISL232752
EPIISL208477	EPIISL17776958	EPIISL233382	EPIISL232799
EPIISL210300	EPIISL17780396	EPIISL233383	EPIISL232934
EPIISL210427	EPIISL17804761	EPIISL233697	EPIISL233096
EPIISL212325	EPIISL17813970	EPIISL235493	EPIISL233098
EPIISL212527	EPIISL17851868	EPIISL235500	EPIISL233109
EPIISL212671	EPIISL178959	EPIISL236861	EPIISL233137
EPIISL213054	EPIISL179302	EPIISL237891	EPIISL233160
EPIISL213117	EPIISL18001673	EPIISL238129	EPIISL233171
EPIISL213137	EPIISL18002450	EPIISL238818	EPIISL233177
EPIISL213151	EPIISL18006876	EPIISL238827	EPIISL233201
EPIISL213264	EPIISL18008462	EPIISL238832	EPIISL233654
EPIISL213277	EPIISL18011284	EPIISL239055	EPIISL233661
EPIISL213286	EPIISL18043670	EPIISL239057	EPIISL233671
EPIISL213305	EPIISL18054194	EPIISL239897	EPIISL233710
EPIISL213338	EPIISL18075223	EPIISL240432	EPIISL235488
EPIISL213897	EPIISL18076731	EPIISL240877	EPIISL235510
EPIISL214165	EPIISL18120045	EPIISL241300	EPIISL235597
EPIISL214206	EPIISL18120087	EPIISL241304	EPIISL237679
EPIISL214345	EPIISL18169065	EPIISL241306	EPIISL237914
EPIISL214357	EPIISL18211368	EPIISL241325	EPIISL238239
EPIISL214858	EPIISL18211397	EPIISL241403	EPIISL238263
EPIISL214935	EPIISL18211431	EPIISL241421	EPIISL238844
EPIISL214980	EPIISL18211450	EPIISL241439	EPIISL238864
EPIISL215052	EPIISL18230463	EPIISL241658	EPIISL240377
EPIISL215977	EPIISL18366313	EPIISL242545	EPIISL240393
EPIISL216074	EPIISL18624059	EPIISL243834	EPIISL240661
EPIISL216216	EPIISL18624114	EPIISL244114	EPIISL240979
EPIISL216410	EPIISL18624147	EPIISL247048	EPIISL241729
EPIISL216418	EPIISL18665755	EPIISL247551	EPIISL242438
EPIISL216453	EPIISL18666082	EPIISL247569	EPIISL242529
EPIISL216974	EPIISL18681104	EPIISL247620	EPIISL243868
EPIISL216976	EPIISL18681134	EPIISL247647	EPIISL243870
EPIISL217920	EPIISL18681261	EPIISL247661	EPIISL243893
EPIISL218097	EPIISL18681269	EPIISL248679	EPIISL243900
EPIISL218151	EPIISL18681315	EPIISL248699	EPIISL244094
EPIISL218160	EPIISL18723033	EPIISL2521239	EPIISL244109
EPIISL218197	EPIISL18723138	EPIISL252888	EPIISL245304
EPIISL218386	EPIISL18723146	EPIISL253301	EPIISL247648
EPIISL218408	EPIISL187391	EPIISL253455	EPIISL247691
EPIISL218728	EPIISL18755376	EPIISL255304	EPIISL248354
EPIISL218749	EPIISL18759969	EPIISL2557684	EPIISL248697
EPIISL218890	EPIISL18760005	EPIISL2557717	EPIISL248717
EPIISL218978	EPIISL18775952	EPIISL2557897	EPIISL248995
EPIISL219334	EPIISL18776063	EPIISL2557898	EPIISL252749
EPIISL219369	EPIISL18776344	EPIISL2557963	EPIISL252883
EPIISL219386	EPIISL18781803	EPIISL256433	EPIISL252889
EPIISL219552	EPIISL18781856	EPIISL256435	EPIISL252998
EPIISL219661	EPIISL18781906	EPIISL256849	EPIISL255232
EPIISL219700	EPIISL18789201	EPIISL257002	EPIISL255234
EPIISL219724	EPIISL188629	EPIISL2574108	EPIISL255474
EPIISL219980	EPIISL188748	EPIISL257738	EPIISL255483
EPIISL220930	EPIISL188894	EPIISL2578638	EPIISL255484
EPIISL221148	EPIISL18951961	EPIISL258057	EPIISL255663
EPIISL221199	EPIISL19117089	EPIISL2584069	EPIISL255790
EPIISL221200	EPIISL19172937	EPIISL259355	EPIISL255795
EPIISL221212	EPIISL19173338	EPIISL259370	EPIISL255815
EPIISL221231	EPIISL191820	EPIISL259446	EPIISL256112
EPIISL221233	EPIISL19189492	EPIISL259452	EPIISL256838
EPIISL221260	EPIISL192262	EPIISL259470	EPIISL256860
EPIISL221290	EPIISL192710	EPIISL259478	EPIISL256879
EPIISL221409	EPIISL19280359	EPIISL259625	EPIISL256886
EPIISL221854	EPIISL194632	EPIISL259914	EPIISL257973
EPIISL222113	EPIISL194655	EPIISL259919	EPIISL258047
EPIISL222706	EPIISL194685	EPIISL259921	EPIISL258154
EPIISL222715	EPIISL194691	EPIISL260475	EPIISL258159
EPIISL222751	EPIISL194728	EPIISL260479	EPIISL258189
EPIISL223237	EPIISL194733	EPIISL260502	EPIISL259413
EPIISL223280	EPIISL194775	EPIISL261204	EPIISL259520
EPIISL223298	EPIISL195845	EPIISL261217	EPIISL261876
EPIISL223472	EPIISL195855	EPIISL261269	EPIISL262634
EPIISL223474	EPIISL196285	EPIISL262796	EPIISL262769
EPIISL223618	EPIISL197899	EPIISL262945	EPIISL262838
EPIISL223856	EPIISL197982	EPIISL262947	EPIISL262867
EPIISL223954	EPIISL199672	EPIISL263085	EPIISL263008
EPIISL224168	EPIISL199718	EPIISL263572	EPIISL263487
EPIISL224223	EPIISL199805	EPIISL264105	EPIISL264102
EPIISL224273	EPIISL199806	EPIISL264120	EPIISL264505
EPIISL224364	EPIISL200721	EPIISL264131	EPIISL264512
EPIISL224365	EPIISL201173	EPIISL264503	EPIISL265055
EPIISL224464	EPIISL201249	EPIISL264811	EPIISL266625
EPIISL2245116	EPIISL201476	EPIISL265045	EPIISL266648
EPIISL2245156	EPIISL201634	EPIISL265165	EPIISL266908
EPIISL2245995	EPIISL202310	EPIISL265799	EPIISL267006
EPIISL2246155	EPIISL202395	EPIISL265809	EPIISL267134
EPIISL2246184	EPIISL202589	EPIISL266303	EPIISL267457
EPIISL224657	EPIISL202593	EPIISL266305	EPIISL267471
EPIISL225334	EPIISL202888	EPIISL266387	EPIISL267477
EPIISL2258109	EPIISL203063	EPIISL266620	EPIISL267515
EPIISL2258289	EPIISL203430	EPIISL267012	EPIISL268020
EPIISL226973	EPIISL203522	EPIISL267573	EPIISL268546
EPIISL227000	EPIISL203556	EPIISL267577	EPIISL269285
EPIISL227412	EPIISL205021	EPIISL267596	EPIISL269684
EPIISL227434	EPIISL205253	EPIISL268026	EPIISL269685
EPIISL227490	EPIISL205454	EPIISL268740	EPIISL269969
EPIISL227562	EPIISL205642	EPIISL268822	EPIISL270276
EPIISL227590	EPIISL206932	EPIISL268823	EPIISL270285
EPIISL230382	EPIISL207641	EPIISL268834	EPIISL270579
EPIISL230439	EPIISL208588	EPIISL268888	EPIISL270667
EPIISL230476	EPIISL209049	EPIISL269481	EPIISL270670
EPIISL230650	EPIISL213082	EPIISL269486	EPIISL273884
EPIISL230684	EPIISL215288	EPIISL2695888	EPIISL273889
EPIISL2308174	EPIISL215842	EPIISL2695899	EPIISL274424
EPIISL231516	EPIISL217225	EPIISL2695903	EPIISL275477
EPIISL231602	EPIISL218462	EPIISL2695945	EPIISL275540
EPIISL231754	EPIISL220341	EPIISL2695997	EPIISL276032
EPIISL231904	EPIISL222029	EPIISL2696036	EPIISL276056
EPIISL231919	EPIISL222048	EPIISL2696076	EPIISL276410
EPIISL231952	EPIISL222058	EPIISL2696110	EPIISL276463
EPIISL232061	EPIISL222078	EPIISL2696123	EPIISL276465
EPIISL232173	EPIISL223593	EPIISL2696130	EPIISL276471
EPIISL232421	EPIISL224559	EPIISL2696138	EPIISL276550
EPIISL232452	EPIISL225056	EPIISL2696144	EPIISL276554
EPIISL232721	EPIISL225145	EPIISL2696150	EPIISL276643
EPIISL232732	EPIISL225915	EPIISL2696175	EPIISL276679
EPIISL233015	EPIISL226095	EPIISL2696238	EPIISL276798
EPIISL233034	EPIISL231818	EPIISL2696264	EPIISL276920
EPIISL233052	EPIISL232813	EPIISL2696271	EPIISL277080
EPIISL233557	EPIISL233232	EPIISL269668	EPIISL277090
EPIISL233568	EPIISL233269	EPIISL269675	EPIISL277222
EPIISL233573	EPIISL233277	EPIISL269705	EPIISL277226
EPIISL233575	EPIISL233289	EPIISL269736	EPIISL277251
EPIISL233585	EPIISL233316	EPIISL270006	EPIISL277634
EPIISL233587	EPIISL234190	EPIISL270022	EPIISL277635
EPIISL233950	EPIISL234208	EPIISL270026	EPIISL277663
EPIISL233991	EPIISL234224	EPIISL270133	EPIISL281638
EPIISL235341	EPIISL234987	EPIISL270613	EPIISL282225
EPIISL235389	EPIISL235664	EPIISL270617	EPIISL282245
EPIISL237239	EPIISL236785	EPIISL270689	EPIISL282294
EPIISL237427	EPIISL237254	EPIISL270712	EPIISL282344
EPIISL237533	EPIISL237335	EPIISL271031	EPIISL282644
EPIISL238318	EPIISL237472	EPIISL271035	EPIISL283268
EPIISL238346	EPIISL239142	EPIISL271955	EPIISL283391
EPIISL238385	EPIISL239146	EPIISL272614	EPIISL283989
EPIISL238756	EPIISL239193	EPIISL272641	EPIISL284106
EPIISL240245	EPIISL239283	EPIISL273801	EPIISL284120
EPIISL240253	EPIISL239305	EPIISL273809	EPIISL284182
EPIISL240830	EPIISL239402	EPIISL273916	EPIISL284937
EPIISL241124	EPIISL239507	EPIISL273917	EPIISL284956
EPIISL241212	EPIISL239944	EPIISL274373	EPIISL284958
EPIISL241486	EPIISL240148	EPIISL274393	EPIISL285822
EPIISL241488	EPIISL240329	EPIISL274399	EPIISL286147
EPIISL241693	EPIISL240525	EPIISL275470	EPIISL286815
EPIISL241700	EPIISL241315	EPIISL276392	EPIISL287037
EPIISL242400	EPIISL241330	EPIISL276433	EPIISL287050
EPIISL242520	EPIISL241357	EPIISL276521	EPIISL287634
EPIISL243155	EPIISL241589	EPIISL276622	EPIISL287643
EPIISL243159	EPIISL241612	EPIISL276640	EPIISL287652
EPIISL244317	EPIISL242424	EPIISL276672	EPIISL287736
EPIISL244399	EPIISL242603	EPIISL278533	EPIISL288118
EPIISL244413	EPIISL242760	EPIISL278675	EPIISL288351
EPIISL244560	EPIISL244055	EPIISL279046	EPIISL288585
EPIISL244768	EPIISL244223	EPIISL281653	EPIISL288601
EPIISL245482	EPIISL244786	EPIISL283374	EPIISL288615
EPIISL247876	EPIISL245001	EPIISL283375	EPIISL288745
EPIISL248019	EPIISL245207	EPIISL283377	EPIISL289182
EPIISL248199	EPIISL245252	EPIISL283388	EPIISL289244
EPIISL248239	EPIISL246002	EPIISL284116	EPIISL289282
EPIISL248264	EPIISL246072	EPIISL284122	EPIISL289513
EPIISL248813	EPIISL248509	EPIISL284935	EPIISL289524
EPIISL251588	EPIISL248832	EPIISL284974	EPIISL289525
EPIISL251609	EPIISL248855	EPIISL285824	EPIISL289605
EPIISL251613	EPIISL249349	EPIISL286095	EPIISL289608
EPIISL2517172	EPIISL250354	EPIISL286812	EPIISL289632
EPIISL2517210	EPIISL250364	EPIISL286982	EPIISL289633
EPIISL2521294	EPIISL250990	EPIISL287066	EPIISL289636
EPIISL2521681	EPIISL251013	EPIISL287074	EPIISL289640
EPIISL2521686	EPIISL251038	EPIISL287097	EPIISL289663
EPIISL252599	EPIISL251275	EPIISL287373	EPIISL289860
EPIISL2532096	EPIISL252451	EPIISL288872	EPIISL289935
EPIISL253335	EPIISL253067	EPIISL289598	EPIISL290419
EPIISL253336	EPIISL253114	EPIISL292710	EPIISL290423
EPIISL253777	EPIISL255070	EPIISL292711	EPIISL290567
EPIISL255596	EPIISL255101	EPIISL293011	EPIISL290856
EPIISL2557643	EPIISL255524	EPIISL294165	EPIISL291036
EPIISL256908	EPIISL255526	EPIISL294987	EPIISL291041
EPIISL257189	EPIISL256414	EPIISL296175	EPIISL291043
EPIISL257916	EPIISL257328	EPIISL296180	EPIISL291087
EPIISL2585207	EPIISL258255	EPIISL296365	EPIISL291099
EPIISL2588642	EPIISL258819	EPIISL296534	EPIISL291275
EPIISL258886	EPIISL258927	EPIISL296880	EPIISL291387
EPIISL2625830	EPIISL259035	EPIISL297030	EPIISL291391
EPIISL263240	EPIISL259201	EPIISL298392	EPIISL291534
EPIISL266843	EPIISL259250	EPIISL298416	EPIISL291559
EPIISL266851	EPIISL259568	EPIISL299099	EPIISL291565
EPIISL268413	EPIISL259716	EPIISL299103	EPIISL291590
EPIISL268449	EPIISL261481	EPIISL300162	EPIISL291611
EPIISL268722	EPIISL261807	EPIISL302996	EPIISL291613
EPIISL268763	EPIISL263212	EPIISL303007	EPIISL291814
EPIISL269623	EPIISL263459	EPIISL303015	EPIISL291821
EPIISL269951	EPIISL263862	EPIISL303028	EPIISL291842
EPIISL270236	EPIISL264072	EPIISL303657	EPIISL291846
EPIISL270255	EPIISL264471	EPIISL305161	EPIISL291858
EPIISL271476	EPIISL264603	EPIISL305187	EPIISL291862
EPIISL271608	EPIISL264618	EPIISL305334	EPIISL291882
EPIISL271792	EPIISL264708	EPIISL305867	EPIISL291885
EPIISL271813	EPIISL264723	EPIISL306157	EPIISL291903
EPIISL271822	EPIISL264831	EPIISL306736	EPIISL291968
EPIISL271848	EPIISL265289	EPIISL307849	EPIISL292039
EPIISL271924	EPIISL265390	EPIISL308734	EPIISL292042
EPIISL272018	EPIISL265476	EPIISL309111	EPIISL292064
EPIISL272054	EPIISL265586	EPIISL309647	EPIISL292066
EPIISL272175	EPIISL265705	EPIISL309744	EPIISL292199
EPIISL273800	EPIISL265748	EPIISL309746	EPIISL292201
EPIISL277629	EPIISL265756	EPIISL310006	EPIISL292206
EPIISL278682	EPIISL265879	EPIISL311916	EPIISL292463
EPIISL279397	EPIISL265892	EPIISL312425	EPIISL292696
EPIISL279473	EPIISL265945	EPIISL312538	EPIISL292698
EPIISL279485	EPIISL266672	EPIISL312757	EPIISL292717
EPIISL280461	EPIISL267096	EPIISL312893	EPIISL292729
EPIISL280538	EPIISL268351	EPIISL313097	EPIISL292965
EPIISL282171	EPIISL268355	EPIISL313443	EPIISL292979
EPIISL282261	EPIISL268788	EPIISL313451	EPIISL292997
EPIISL282621	EPIISL269377	EPIISL314451	EPIISL293003
EPIISL282651	EPIISL269767	EPIISL314464	EPIISL293015
EPIISL282758	EPIISL269799	EPIISL314488	EPIISL293030
EPIISL283111	EPIISL269845	EPIISL315853	EPIISL293619
EPIISL283687	EPIISL270433	EPIISL320178	EPIISL293674
EPIISL284835	EPIISL270452	EPIISL321364	EPIISL293676
EPIISL286073	EPIISL270458	EPIISL330343	EPIISL293714
EPIISL286212	EPIISL270474	EPIISL330535	EPIISL293821
EPIISL286251	EPIISL270818	EPIISL330607	EPIISL294364
EPIISL286259	EPIISL270968	EPIISL331210	EPIISL294373
EPIISL286833	EPIISL273191	EPIISL334496	EPIISL294378
EPIISL291039	EPIISL273203	EPIISL334588	EPIISL294968
EPIISL291514	EPIISL273654	EPIISL334896	EPIISL294996
EPIISL292372	EPIISL274103	EPIISL334907	EPIISL294999
EPIISL292645	EPIISL274119	EPIISL334990	EPIISL295945
EPIISL292660	EPIISL274434	EPIISL336286	EPIISL295952
EPIISL292664	EPIISL274681	EPIISL336300	EPIISL295966
EPIISL294110	EPIISL274886	EPIISL336338	EPIISL296298
EPIISL294148	EPIISL275133	EPIISL336344	EPIISL296337
EPIISL297041	EPIISL275232	EPIISL336352	EPIISL296342
EPIISL297167	EPIISL275321	EPIISL336405	EPIISL296628
EPIISL297941	EPIISL275545	EPIISL336410	EPIISL296642
EPIISL300060	EPIISL275804	EPIISL336442	EPIISL296655
EPIISL300072	EPIISL275898	EPIISL336465	EPIISL296797
EPIISL300470	EPIISL277152	EPIISL336842	EPIISL296818
EPIISL300483	EPIISL277189	EPIISL336853	EPIISL297200
EPIISL300856	EPIISL277475	EPIISL337466	EPIISL297203
EPIISL301206	EPIISL277533	EPIISL338965	EPIISL297417
EPIISL301339	EPIISL278120	EPIISL339805	EPIISL297420
EPIISL302448	EPIISL278723	EPIISL339816	EPIISL297434
EPIISL302450	EPIISL278731	EPIISL341099	EPIISL297508
EPIISL302849	EPIISL279438	EPIISL341147	EPIISL297512
EPIISL303171	EPIISL280824	EPIISL341806	EPIISL297518
EPIISL303555	EPIISL280994	EPIISL344119	EPIISL297522
EPIISL304293	EPIISL281031	EPIISL345176	EPIISL297811
EPIISL304611	EPIISL281405	EPIISL345177	EPIISL298039
EPIISL304677	EPIISL281408	EPIISL347749	EPIISL298047
EPIISL305244	EPIISL281420	EPIISL348591	EPIISL298438
EPIISL305478	EPIISL281540	EPIISL350005	EPIISL298655
EPIISL306678	EPIISL281851	EPIISL350024	EPIISL298657
EPIISL307758	EPIISL282799	EPIISL350900	EPIISL298708
EPIISL308125	EPIISL282811	EPIISL350930	EPIISL298742
EPIISL308516	EPIISL282938	EPIISL350937	EPIISL298781
EPIISL308854	EPIISL283101	EPIISL350939	EPIISL298788
EPIISL309038	EPIISL283324	EPIISL351723	EPIISL298790
EPIISL309487	EPIISL284914	EPIISL351728	EPIISL299072
EPIISL309960	EPIISL285686	EPIISL3535233	EPIISL299087
EPIISL311903	EPIISL285884	EPIISL3535235	EPIISL299118
EPIISL312223	EPIISL285897	EPIISL3535258	EPIISL299123
EPIISL312245	EPIISL285970	EPIISL353601	EPIISL299128
EPIISL312961	EPIISL286003	EPIISL353728	EPIISL299131
EPIISL313574	EPIISL286036	EPIISL354361	EPIISL299412
EPIISL314219	EPIISL286358	EPIISL354375	EPIISL299450
EPIISL314776	EPIISL286446	EPIISL354383	EPIISL299462
EPIISL315694	EPIISL286570	EPIISL354493	EPIISL299468
EPIISL315953	EPIISL286612	EPIISL355662	EPIISL299474
EPIISL315965	EPIISL287072	EPIISL356352	EPIISL299629
EPIISL319661	EPIISL287218	EPIISL356439	EPIISL299714
EPIISL319773	EPIISL287422	EPIISL357993	EPIISL300131
EPIISL319784	EPIISL287449	EPIISL357997	EPIISL300141
EPIISL320034	EPIISL287453	EPIISL358392	EPIISL300185
EPIISL320045	EPIISL287812	EPIISL3613060	EPIISL300262
EPIISL320202	EPIISL287842	EPIISL361868	EPIISL300287
EPIISL320234	EPIISL287892	EPIISL362491	EPIISL300290
EPIISL320235	EPIISL288038	EPIISL362514	EPIISL300299
EPIISL320411	EPIISL288209	EPIISL362536	EPIISL300569
EPIISL320463	EPIISL288278	EPIISL363311	EPIISL300572
EPIISL320465	EPIISL288452	EPIISL363411	EPIISL300587
EPIISL320811	EPIISL288938	EPIISL363694	EPIISL300944
EPIISL320838	EPIISL288966	EPIISL363748	EPIISL300951
EPIISL320949	EPIISL288992	EPIISL364191	EPIISL300958
EPIISL320995	EPIISL289292	EPIISL364225	EPIISL300963
EPIISL321487	EPIISL289301	EPIISL364242	EPIISL300968
EPIISL321728	EPIISL289365	EPIISL364634	EPIISL301119
EPIISL321783	EPIISL289554	EPIISL364639	EPIISL301130
EPIISL321944	EPIISL289747	EPIISL364652	EPIISL301131
EPIISL321962	EPIISL289867	EPIISL364903	EPIISL301191
EPIISL321970	EPIISL289877	EPIISL365732	EPIISL301213
EPIISL322051	EPIISL289887	EPIISL367076	EPIISL301263
EPIISL322227	EPIISL289901	EPIISL367103	EPIISL301279
EPIISL322420	EPIISL290082	EPIISL367104	EPIISL301627
EPIISL322858	EPIISL290680	EPIISL367153	EPIISL301636
EPIISL322912	EPIISL290686	EPIISL367338	EPIISL301669
EPIISL322970	EPIISL291409	EPIISL367424	EPIISL302070
EPIISL326785	EPIISL291931	EPIISL367554	EPIISL302107
EPIISL328534	EPIISL292589	EPIISL367853	EPIISL302163
EPIISL328557	EPIISL293073	EPIISL367860	EPIISL302346
EPIISL329518	EPIISL293386	EPIISL368290	EPIISL302355
EPIISL329759	EPIISL293604	EPIISL368300	EPIISL302597
EPIISL329863	EPIISL293696	EPIISL368857	EPIISL302685
EPIISL330211	EPIISL293773	EPIISL370359	EPIISL302695
EPIISL330782	EPIISL294209	EPIISL370361	EPIISL302703
EPIISL330827	EPIISL295104	EPIISL370363	EPIISL302755
EPIISL330834	EPIISL295876	EPIISL370491	EPIISL302756
EPIISL330857	EPIISL296089	EPIISL3722780	EPIISL302770
EPIISL330863	EPIISL296489	EPIISL3722793	EPIISL302814
EPIISL330878	EPIISL296956	EPIISL376923	EPIISL302945
EPIISL331389	EPIISL298184	EPIISL377021	EPIISL302953
EPIISL331396	EPIISL298196	EPIISL377209	EPIISL303207
EPIISL331629	EPIISL298229	EPIISL377572	EPIISL303331
EPIISL331942	EPIISL298257	EPIISL380417	EPIISL303343
EPIISL331943	EPIISL298330	EPIISL380592	EPIISL303354
EPIISL331952	EPIISL298555	EPIISL3856664	EPIISL303357
EPIISL331972	EPIISL298851	EPIISL386888	EPIISL303397
EPIISL332123	EPIISL299596	EPIISL386909	EPIISL303449
EPIISL332137	EPIISL299652	EPIISL387375	EPIISL303479
EPIISL332204	EPIISL299812	EPIISL389096	EPIISL303492
EPIISL332205	EPIISL299874	EPIISL389234	EPIISL303958
EPIISL332346	EPIISL299984	EPIISL389505	EPIISL304362
EPIISL332584	EPIISL299987	EPIISL389944	EPIISL304453
EPIISL332614	EPIISL300798	EPIISL389952	EPIISL304455
EPIISL332616	EPIISL301431	EPIISL390619	EPIISL304495
EPIISL332693	EPIISL302035	EPIISL390647	EPIISL304506
EPIISL332826	EPIISL302087	EPIISL390651	EPIISL304583
EPIISL332841	EPIISL302277	EPIISL390885	EPIISL304601
EPIISL332846	EPIISL303114	EPIISL391333	EPIISL304604
EPIISL332928	EPIISL303920	EPIISL391347	EPIISL304745
EPIISL333208	EPIISL304033	EPIISL391349	EPIISL304770
EPIISL333234	EPIISL304936	EPIISL391352	EPIISL304789
EPIISL333343	EPIISL305002	EPIISL391657	EPIISL304792
EPIISL333484	EPIISL305494	EPIISL391716	EPIISL304822
EPIISL333518	EPIISL305501	EPIISL391718	EPIISL304823
EPIISL333532	EPIISL305563	EPIISL391747	EPIISL304836
EPIISL333550	EPIISL305849	EPIISL393528	EPIISL304839
EPIISL333824	EPIISL306203	EPIISL393640	EPIISL304853
EPIISL334015	EPIISL306257	EPIISL393656	EPIISL304862
EPIISL334230	EPIISL306270	EPIISL393885	EPIISL305121
EPIISL334287	EPIISL306746	EPIISL393891	EPIISL305156
EPIISL334306	EPIISL306869	EPIISL393895	EPIISL305160
EPIISL334944	EPIISL308981	EPIISL394255	EPIISL305168
EPIISL334962	EPIISL309379	EPIISL394870	EPIISL305315
EPIISL334964	EPIISL309560	EPIISL395011	EPIISL305321
EPIISL335047	EPIISL310926	EPIISL395041	EPIISL305326
EPIISL335128	EPIISL311636	EPIISL397039	EPIISL305327
EPIISL335308	EPIISL311991	EPIISL397052	EPIISL305353
EPIISL335359	EPIISL312816	EPIISL397053	EPIISL305373
EPIISL335374	EPIISL313018	EPIISL397058	EPIISL305512
EPIISL335422	EPIISL313052	EPIISL397143	EPIISL306125
EPIISL335506	EPIISL313521	EPIISL397151	EPIISL306160
EPIISL335556	EPIISL314402	EPIISL397320	EPIISL306183
EPIISL335559	EPIISL315787	EPIISL398472	EPIISL306446
EPIISL335572	EPIISL315986	EPIISL398506	EPIISL306448
EPIISL335702	EPIISL316604	EPIISL398510	EPIISL306465
EPIISL335745	EPIISL316795	EPIISL398527	EPIISL306544
EPIISL335948	EPIISL319709	EPIISL398893	EPIISL306545
EPIISL336640	EPIISL319711	EPIISL398929	EPIISL306681
EPIISL336671	EPIISL319956	EPIISL399886	EPIISL307165
EPIISL336810	EPIISL320150	EPIISL399893	EPIISL307174
EPIISL337315	EPIISL320284	EPIISL400098	EPIISL307202
EPIISL337325	EPIISL320300	EPIISL400114	EPIISL307214
EPIISL337331	EPIISL320752	EPIISL400115	EPIISL307678
EPIISL337367	EPIISL321576	EPIISL400144	EPIISL307775
EPIISL337385	EPIISL322077	EPIISL400184	EPIISL307839
EPIISL338223	EPIISL322472	EPIISL400190	EPIISL308542
EPIISL338238	EPIISL327211	EPIISL4005802	EPIISL308561
EPIISL338255	EPIISL327258	EPIISL401038	EPIISL308585
EPIISL338380	EPIISL327321	EPIISL401067	EPIISL308607
EPIISL338654	EPIISL328550	EPIISL401083	EPIISL308609
EPIISL338730	EPIISL328708	EPIISL401111	EPIISL308632
EPIISL338829	EPIISL328953	EPIISL401210	EPIISL308638
EPIISL338902	EPIISL329388	EPIISL401341	EPIISL308669
EPIISL339096	EPIISL329435	EPIISL401371	EPIISL308672
EPIISL339176	EPIISL329492	EPIISL401393	EPIISL308696
EPIISL339188	EPIISL330012	EPIISL401633	EPIISL308703
EPIISL339561	EPIISL330478	EPIISL401661	EPIISL308769
EPIISL339575	EPIISL330928	EPIISL401851	EPIISL308771
EPIISL339879	EPIISL331124	EPIISL401929	EPIISL309121
EPIISL339918	EPIISL331199	EPIISL401988	EPIISL309700
EPIISL340040	EPIISL331225	EPIISL402004	EPIISL309921
EPIISL340523	EPIISL331253	EPIISL402255	EPIISL309987
EPIISL340949	EPIISL331542	EPIISL402609	EPIISL310874
EPIISL340988	EPIISL3315856	EPIISL402670	EPIISL311561
EPIISL341844	EPIISL331707	EPIISL402672	EPIISL311584
EPIISL341874	EPIISL331773	EPIISL402867	EPIISL311627
EPIISL341883	EPIISL332645	EPIISL402929	EPIISL311937
EPIISL342052	EPIISL332676	EPIISL402976	EPIISL311944
EPIISL342053	EPIISL332710	EPIISL403048	EPIISL312040
EPIISL343359	EPIISL332980	EPIISL403067	EPIISL312141
EPIISL343454	EPIISL333856	EPIISL403180	EPIISL312374
EPIISL344030	EPIISL334507	EPIISL403245	EPIISL312395
EPIISL344043	EPIISL334667	EPIISL403497	EPIISL312400
EPIISL344575	EPIISL336193	EPIISL403740	EPIISL312404
EPIISL344736	EPIISL336275	EPIISL403825	EPIISL312417
EPIISL344765	EPIISL336740	EPIISL403839	EPIISL312479
EPIISL344791	EPIISL338596	EPIISL403849	EPIISL312560
EPIISL344813	EPIISL338762	EPIISL403863	EPIISL312582
EPIISL345249	EPIISL339726	EPIISL403865	EPIISL312629
EPIISL345396	EPIISL341118	EPIISL403897	EPIISL313088
EPIISL345407	EPIISL341986	EPIISL403922	EPIISL313134
EPIISL345442	EPIISL344505	EPIISL403994	EPIISL313181
EPIISL345999	EPIISL344641	EPIISL404007	EPIISL313193
EPIISL346032	EPIISL346095	EPIISL404093	EPIISL313211
EPIISL346437	EPIISL347027	EPIISL404104	EPIISL313497
EPIISL346481	EPIISL347920	EPIISL404106	EPIISL313610
EPIISL347362	EPIISL348219	EPIISL404135	EPIISL313649
EPIISL347431	EPIISL349946	EPIISL404153	EPIISL313900
EPIISL347433	EPIISL350067	EPIISL404166	EPIISL313972
EPIISL347524	EPIISL350861	EPIISL404187	EPIISL313995
EPIISL347552	EPIISL350877	EPIISL404226	EPIISL314074
EPIISL348108	EPIISL352059	EPIISL404259	EPIISL314125
EPIISL348452	EPIISL352921	EPIISL404394	EPIISL314137
EPIISL349860	EPIISL352927	EPIISL404409	EPIISL314292
EPIISL350839	EPIISL353974	EPIISL404419	EPIISL314434
EPIISL350940	EPIISL353979	EPIISL404728	EPIISL314720
EPIISL350968	EPIISL354143	EPIISL404865	EPIISL314735
EPIISL351376	EPIISL354192	EPIISL404869	EPIISL314737
EPIISL352166	EPIISL354238	EPIISL404896	EPIISL314738
EPIISL352193	EPIISL354680	EPIISL404927	EPIISL314751
EPIISL353363	EPIISL354736	EPIISL404933	EPIISL314752
EPIISL353420	EPIISL354741	EPIISL405076	EPIISL314940
EPIISL353972	EPIISL354746	EPIISL405306	EPIISL314949
EPIISL354097	EPIISL354777	EPIISL405502	EPIISL314957
EPIISL354252	EPIISL355232	EPIISL405509	EPIISL315057
EPIISL354263	EPIISL355545	EPIISL406047	EPIISL315142
EPIISL354266	EPIISL355839	EPIISL406090	EPIISL315189
EPIISL354269	EPIISL356229	EPIISL406494	EPIISL315198
EPIISL354296	EPIISL356274	EPIISL406586	EPIISL315200
EPIISL354362	EPIISL356447	EPIISL406591	EPIISL315503
EPIISL355306	EPIISL356675	EPIISL406842	EPIISL315510
EPIISL355366	EPIISL357160	EPIISL407056	EPIISL315847
EPIISL355439	EPIISL357177	EPIISL407103	EPIISL315916
EPIISL355440	EPIISL357720	EPIISL407130	EPIISL316011
EPIISL355481	EPIISL358083	EPIISL407223	EPIISL316015
EPIISL356026	EPIISL358300	EPIISL407260	EPIISL316052
EPIISL356043	EPIISL358448	EPIISL407300	EPIISL316069
EPIISL356166	EPIISL359265	EPIISL407575	EPIISL316626
EPIISL356190	EPIISL359554	EPIISL407584	EPIISL316638
EPIISL356197	EPIISL359644	EPIISL407589	EPIISL319679
EPIISL356689	EPIISL359915	EPIISL407594	EPIISL319890
EPIISL358495	EPIISL360527	EPIISL408477	EPIISL319928
EPIISL358573	EPIISL360566	EPIISL408547	EPIISL320074
EPIISL358808	EPIISL360774	EPIISL409285	EPIISL320108
EPIISL358922	EPIISL360939	EPIISL409307	EPIISL320109
EPIISL358982	EPIISL361225	EPIISL409537	EPIISL320472
EPIISL359051	EPIISL361263	EPIISL409568	EPIISL320584
EPIISL359238	EPIISL361308	EPIISL409571	EPIISL320667
EPIISL359305	EPIISL361316	EPIISL409595	EPIISL320925
EPIISL359320	EPIISL361893	EPIISL409615	EPIISL320931
EPIISL359547	EPIISL362155	EPIISL409619	EPIISL320934
EPIISL359735	EPIISL362614	EPIISL409622	EPIISL321009
EPIISL360931	EPIISL363324	EPIISL409649	EPIISL321015
EPIISL361723	EPIISL363555	EPIISL410096	EPIISL321017
EPIISL362321	EPIISL363832	EPIISL410118	EPIISL321020
EPIISL363027	EPIISL363967	EPIISL410121	EPIISL321053
EPIISL363030	EPIISL364005	EPIISL410296	EPIISL321060
EPIISL363525	EPIISL364334	EPIISL410323	EPIISL321079
EPIISL363536	EPIISL364359	EPIISL410552	EPIISL321093
EPIISL363755	EPIISL364381	EPIISL410558	EPIISL321151
EPIISL364081	EPIISL364775	EPIISL410909	EPIISL321167
EPIISL364083	EPIISL364804	EPIISL410937	EPIISL321168
EPIISL364686	EPIISL365570	EPIISL411068	EPIISL321339
EPIISL364719	EPIISL365822	EPIISL411160	EPIISL321380
EPIISL364875	EPIISL365997	EPIISL411593	EPIISL321386
EPIISL365899	EPIISL366448	EPIISL411623	EPIISL321391
EPIISL365900	EPIISL366836	EPIISL411627	EPIISL321395
EPIISL365944	EPIISL367108	EPIISL411643	EPIISL321494
EPIISL366023	EPIISL368595	EPIISL411647	EPIISL321817
EPIISL366107	EPIISL368917	EPIISL411665	EPIISL321985
EPIISL366255	EPIISL369101	EPIISL411724	EPIISL322000
EPIISL366643	EPIISL370202	EPIISL411763	EPIISL322015
EPIISL366657	EPIISL371935	EPIISL411783	EPIISL322016
EPIISL366757	EPIISL372054	EPIISL411809	EPIISL322313
EPIISL367714	EPIISL372201	EPIISL412310	EPIISL322501
EPIISL367966	EPIISL372749	EPIISL412328	EPIISL322513
EPIISL368002	EPIISL376733	EPIISL412342	EPIISL322527
EPIISL368101	EPIISL376784	EPIISL412350	EPIISL323042
EPIISL368113	EPIISL376985	EPIISL412352	EPIISL329948
EPIISL368909	EPIISL377069	EPIISL412359	EPIISL329952
EPIISL369403	EPIISL377296	EPIISL412365	EPIISL330128
EPIISL369966	EPIISL377302	EPIISL412582	EPIISL330149
EPIISL370064	EPIISL377489	EPIISL412625	EPIISL330213
EPIISL370375	EPIISL379856	EPIISL412638	EPIISL330218
EPIISL370559	EPIISL380499	EPIISL412656	EPIISL330228
EPIISL371855	EPIISL380501	EPIISL412673	EPIISL330329
EPIISL371876	EPIISL380623	EPIISL412686	EPIISL330593
EPIISL373385	EPIISL380672	EPIISL412688	EPIISL330617
EPIISL373436	EPIISL381119	EPIISL412693	EPIISL330621
EPIISL373455	EPIISL382318	EPIISL412725	EPIISL330629
EPIISL376065	EPIISL382471	EPIISL412758	EPIISL330784
EPIISL377283	EPIISL388923	EPIISL413507	EPIISL331003
EPIISL377767	EPIISL389481	EPIISL413671	EPIISL331014
EPIISL377768	EPIISL390048	EPIISL414260	EPIISL331080
EPIISL377918	EPIISL391057	EPIISL414264	EPIISL331500
EPIISL378122	EPIISL391138	EPIISL414276	EPIISL331598
EPIISL378799	EPIISL392629	EPIISL414339	EPIISL331829
EPIISL379197	EPIISL393791	EPIISL414360	EPIISL331850
EPIISL3796345	EPIISL394028	EPIISL414980	EPIISL332024
EPIISL380292	EPIISL394602	EPIISL414997	EPIISL332279
EPIISL380373	EPIISL394712	EPIISL414998	EPIISL332284
EPIISL380561	EPIISL394902	EPIISL415001	EPIISL332699
EPIISL380567	EPIISL395325	EPIISL415036	EPIISL332782
EPIISL380699	EPIISL395358	EPIISL415064	EPIISL332867
EPIISL380820	EPIISL395610	EPIISL415074	EPIISL332875
EPIISL381711	EPIISL395704	EPIISL415849	EPIISL333079
EPIISL381870	EPIISL395716	EPIISL415933	EPIISL334260
EPIISL382027	EPIISL395748	EPIISL415934	EPIISL334606
EPIISL386911	EPIISL396255	EPIISL415935	EPIISL334713
EPIISL387207	EPIISL396285	EPIISL415938	EPIISL334718
EPIISL387274	EPIISL396602	EPIISL415945	EPIISL334719
EPIISL389320	EPIISL396613	EPIISL415970	EPIISL334743
EPIISL389713	EPIISL396644	EPIISL415987	EPIISL334770
EPIISL390349	EPIISL396784	EPIISL416973	EPIISL334776
EPIISL390378	EPIISL396841	EPIISL416988	EPIISL334792
EPIISL390490	EPIISL398401	EPIISL418469	EPIISL334802
EPIISL390537	EPIISL398964	EPIISL419142	EPIISL334837
EPIISL390546	EPIISL398979	EPIISL419197	EPIISL334870
EPIISL391259	EPIISL399026	EPIISL419204	EPIISL335092
EPIISL392597	EPIISL399969	EPIISL420888	EPIISL335098
EPIISL395280	EPIISL4005776	EPIISL421022	EPIISL335225
EPIISL395285	EPIISL400577	EPIISL421043	EPIISL335696
EPIISL395306	EPIISL400850	EPIISL421068	EPIISL335697
EPIISL396020	EPIISL401864	EPIISL421081	EPIISL335840
EPIISL396031	EPIISL402206	EPIISL421083	EPIISL336030
EPIISL396090	EPIISL402308	EPIISL424777	EPIISL336033
EPIISL398278	EPIISL402445	EPIISL424803	EPIISL336385
EPIISL398287	EPIISL402761	EPIISL424818	EPIISL336437
EPIISL398294	EPIISL403088	EPIISL424826	EPIISL338151
EPIISL398417	EPIISL403384	EPIISL426262	EPIISL338645
EPIISL399621	EPIISL403424	EPIISL426590	EPIISL338651
EPIISL400063	EPIISL403457	EPIISL428052	EPIISL339115
EPIISL400353	EPIISL404073	EPIISL428063	EPIISL339116
EPIISL400501	EPIISL404550	EPIISL428064	EPIISL339120
EPIISL400958	EPIISL405101	EPIISL428080	EPIISL339124
EPIISL401121	EPIISL405178	EPIISL428097	EPIISL339801
EPIISL401147	EPIISL405435	EPIISL428116	EPIISL339806
EPIISL401516	EPIISL405983	EPIISL428153	EPIISL340343
EPIISL401537	EPIISL406208	EPIISL428182	EPIISL340349
EPIISL401620	EPIISL406320	EPIISL430821	EPIISL340871
EPIISL401798	EPIISL407499	EPIISL430981	EPIISL340872
EPIISL401813	EPIISL408389	EPIISL430984	EPIISL341102
EPIISL402533	EPIISL409056	EPIISL431069	EPIISL341125
EPIISL402535	EPIISL410143	EPIISL431070	EPIISL341135
EPIISL402787	EPIISL410151	EPIISL434579	EPIISL342184
EPIISL402821	EPIISL410265	EPIISL435256	EPIISL342185
EPIISL4030507	EPIISL410286	EPIISL435817	EPIISL344103
EPIISL4030550	EPIISL410525	EPIISL437502	EPIISL344833
EPIISL4030602	EPIISL410599	EPIISL443161	EPIISL345185
EPIISL4030991	EPIISL410738	EPIISL4520706	EPIISL346145
EPIISL4030994	EPIISL410772	EPIISL4520751	EPIISL346168
EPIISL403222	EPIISL410988	EPIISL4520769	EPIISL347499
EPIISL403450	EPIISL411129	EPIISL4539767	EPIISL347520
EPIISL403515	EPIISL411562	EPIISL462633	EPIISL347522
EPIISL403798	EPIISL413263	EPIISL463851	EPIISL347523
EPIISL404279	EPIISL413289	EPIISL463885	EPIISL347864
EPIISL404286	EPIISL415686	EPIISL468188	EPIISL347894
EPIISL404450	EPIISL415721	EPIISL468194	EPIISL348584
EPIISL405576	EPIISL4221814	EPIISL471349	EPIISL350474
EPIISL405578	EPIISL428583	EPIISL471383	EPIISL350498
EPIISL4055886	EPIISL428627	EPIISL471674	EPIISL350508
EPIISL4056042	EPIISL434422	EPIISL471675	EPIISL351732
EPIISL4062045	EPIISL459764	EPIISL4730649	EPIISL353565
EPIISL406229	EPIISL462752	EPIISL476637	EPIISL353578
EPIISL406350	EPIISL471389	EPIISL476641	EPIISL353582
EPIISL406369	EPIISL477397	EPIISL476659	EPIISL353607
EPIISL406868	EPIISL477514	EPIISL476669	EPIISL354371
EPIISL4069844	EPIISL479615	EPIISL477185	EPIISL355678
EPIISL407668	EPIISL480503	EPIISL477325	EPIISL356158
EPIISL407677	EPIISL482819	EPIISL477349	EPIISL356329
EPIISL409217	EPIISL482893	EPIISL477396	EPIISL358275
EPIISL409506	EPIISL486765	EPIISL481487	EPIISL358426
EPIISL409508	EPIISL487001	EPIISL481496	EPIISL358459
EPIISL409536	EPIISL487046	EPIISL481503	EPIISL360537
EPIISL409741	EPIISL491782	EPIISL482925	EPIISL360539
EPIISL410188	EPIISL498209	EPIISL482930	EPIISL360597
EPIISL410398	EPIISL498349	EPIISL485436	EPIISL360704
EPIISL410635	EPIISL498949	EPIISL485504	EPIISL360722
EPIISL410638	EPIISL502022	EPIISL486972	EPIISL360823
EPIISL411253	EPIISL505756	EPIISL486975	EPIISL360834
EPIISL411931	EPIISL514060	EPIISL487072	EPIISL360975
EPIISL412022	EPIISL514688	EPIISL4876095	EPIISL360977
EPIISL412197	EPIISL5159655	EPIISL4876102	EPIISL360982
EPIISL412463	EPIISL5159672	EPIISL490959	EPIISL360991
EPIISL412568	EPIISL529132	EPIISL490974	EPIISL361018
EPIISL412576	EPIISL5327628	EPIISL497923	EPIISL361020
EPIISL413322	EPIISL534032	EPIISL497928	EPIISL361028
EPIISL413343	EPIISL5772204	EPIISL497942	EPIISL361039
EPIISL413430	EPIISL5772224	EPIISL499066	EPIISL361043
EPIISL414091	EPIISL5935408	EPIISL500766	EPIISL361059
EPIISL414162	EPIISL6824616	EPIISL510007	EPIISL361071
EPIISL414775	EPIISL6862998	EPIISL513928	EPIISL361081
EPIISL414803	EPIISL6902026	EPIISL515494	EPIISL361087
EPIISL415842	EPIISL6902083	EPIISL515533	EPIISL361096
EPIISL416837	EPIISL6917698	EPIISL516117	EPIISL361173
EPIISL418455	EPIISL7256897	EPIISL516192	EPIISL361498
EPIISL419024	EPIISL7257507	EPIISL517737	EPIISL361515
EPIISL419080	EPIISL7339281	EPIISL517757	EPIISL361565
EPIISL419189	EPIISL7844544	EPIISL518060	EPIISL361603
EPIISL420885	EPIISL7992162	EPIISL518338	EPIISL361684
EPIISL421537	EPIISL8557657	EPIISL522438	EPIISL361686
EPIISL424710	EPIISL8557868	EPIISL526243	EPIISL362466
EPIISL427861	EPIISL8559372	EPIISL527317	EPIISL362478
EPIISL427983	EPIISL8576430	EPIISL5330545	EPIISL362485
EPIISL428015	EPIISL8576479	EPIISL534094	EPIISL362523
EPIISL428976	EPIISL8609162	EPIISL534118	EPIISL362532
EPIISL429836	EPIISL8636541	EPIISL534126	EPIISL364186
EPIISL434430	EPIISL8636654	EPIISL534142	EPIISL364226
EPIISL435216	EPIISL8786099	EPIISL534148	EPIISL364270
EPIISL435757	EPIISL882829	EPIISL534160	EPIISL365524
EPIISL443142	EPIISL8929410	EPIISL534161	EPIISL365705
EPIISL449755	EPIISL9029144	EPIISL534181	EPIISL367750
EPIISL455542	EPIISL9033414	EPIISL534183	EPIISL368221
EPIISL457718	EPIISL9033461	EPIISL536466	EPIISL368229
EPIISL463721	EPIISL9109660	EPIISL575337	EPIISL369462
EPIISL467722	EPIISL9260598	EPIISL582542	EPIISL373140
EPIISL467777	EPIISL9261214	EPIISL594236	EPIISL373145
EPIISL469268	EPIISL9346161	EPIISL5978326	EPIISL376461
EPIISL471315	EPIISL9390599	EPIISL5978349	EPIISL376462
EPIISL477179	EPIISL9528023	EPIISL6307004	EPIISL376477
EPIISL480552	EPIISL9671401	EPIISL6307060	EPIISL376918
EPIISL481354	EPIISL9702066	EPIISL645160	EPIISL377562
EPIISL485446	EPIISL9769032	EPIISL6601008	EPIISL377595
EPIISL485498	EPIISL9769082	EPIISL672609	EPIISL380489
EPIISL485525		EPIISL672614	EPIISL381148
EPIISL485529		EPIISL684065	EPIISL381165
EPIISL485746		EPIISL684080	EPIISL381193
EPIISL487135		EPIISL684089	EPIISL381213
EPIISL487357		EPIISL7189129	EPIISL386900
EPIISL487480		EPIISL7189220	EPIISL386993
EPIISL487504		EPIISL7189225	EPIISL389340
EPIISL490915		EPIISL767020	EPIISL390981
EPIISL496590		EPIISL767038	EPIISL390994
EPIISL496591		EPIISL768556	EPIISL390999
EPIISL497904		EPIISL768560	EPIISL391598
EPIISL498322		EPIISL768576	EPIISL391623
EPIISL502012		EPIISL7745714	EPIISL391624
EPIISL502111		EPIISL7834038	EPIISL393870
EPIISL502133		EPIISL7834046	EPIISL393872
EPIISL502221		EPIISL8376945	EPIISL394211
EPIISL502250		EPIISL8376949	EPIISL394214
EPIISL503637		EPIISL8544552	EPIISL395005
EPIISL503639		EPIISL8640767	EPIISL395188
EPIISL503684		EPIISL8808691	EPIISL397140
EPIISL505109		EPIISL8814256	EPIISL398183
EPIISL505647		EPIISL9029141	EPIISL398514
EPIISL508576		EPIISL9140543	EPIISL398908
EPIISL508603		EPIISL9140583	EPIISL400387
EPIISL512684		EPIISL9140587	EPIISL401059
EPIISL513940		EPIISL9260887	EPIISL401265
EPIISL513971		EPIISL9345792	EPIISL401631
EPIISL516130		EPIISL9346206	EPIISL402999
EPIISL516187		EPIISL9346210	EPIISL403589
EPIISL517690		EPIISL959668	EPIISL403598
EPIISL518023		EPIISL959669	EPIISL403636
EPIISL536805		EPIISL959687	EPIISL403642
EPIISL584034		EPIISL965152	EPIISL404877
EPIISL584037		EPIISL979817	EPIISL406423
EPIISL628793		EPIISL979845	EPIISL412301
EPIISL637237		EPIISL979852	EPIISL412375
EPIISL654787		EPIISL979856	EPIISL412957
EPIISL7861817		EPIISL979875	EPIISL413398
EPIISL8809785		EPIISL979884	EPIISL435818
EPIISL882891		EPIISL979898	EPIISL471017
EPIISL9140504		EPIISL979904	EPIISL471649
EPIISL9525942		EPIISL979926	EPIISL476798
EPIISL959885		EPIISL979946	EPIISL491852
		EPIISL980815	EPIISL491898
		EPIISL983349	EPIISL535367
		EPIISL9849544	EPIISL535373
		EPIISL9849589	EPIISL684057
		EPIISL9849596
