# Supplementary material for: A decade of genomic surveillance tracks the disappearance and reintroduction of seasonal influenza virus in Aotearoa New Zealand
Source: Research Square preprint supplement (doi:10.21203/rs.3.rs-7503135/v1), 2025-09-03
Supplement: Supplementary file 2 [file c8a91cdcd532a42128fe38cc.xlsx]

## Sheet: BVIC
	Bayesian Skyline: BVIC_HA_date_1.log									Bayesian Skyline: BVIC_MP_Combined									Bayesian Skyline: BVIC_NA_date_1R.log									Bayesian Skyline: BVIC_NP_date_2.log									Bayesian Skyline: BVIC_NS_date_1.log									Bayesian Skyline: BVIC_PA_Combined
time	date	datetime	milliseconds	mean	median	upper	lower		time	date	datetime	milliseconds	mean	median	upper	lower		time	date	datetime	milliseconds	mean	median	upper	lower		time	date	datetime	milliseconds	mean	median	upper	lower		time	date	datetime	milliseconds	mean	median	upper	lower		time	date	datetime	milliseconds	mean
2019.5	2019-06-30	2019-06-30T23:00:00	1561935600526	11.7902	10.0405	31.3226	3.18574		2019.5	2019-06-30	2019-06-30T23:00:00	1561935600434	19.7533	16.7156	52.6562	4.66356		2019.5	2019-06-30	2019-06-30T23:00:00	1561935600079	9.78756	8.25254	25.9473	2.52758		2019.5	2019-06-30	2019-06-30T23:00:00	1561935600289	3.59527	2.6516	12.0487	0.836439		2019.5	2019-06-30	2019-06-30T23:00:00	1561935600133	2.29093	1.94536	6.32696	0.470074		2019.5	2019-06-30	2019-06-30T23:00:00	1561935600601	15.7195
2019.43	2019-06-06	2019-06-06T11:11:17	1559819477352	11.7902	10.0405	31.3226	3.18574		2019.45	2019-06-12	2019-06-12T16:24:43	1560356683414	19.7533	16.7156	52.6562	4.66356		2019.44	2019-06-10	2019-06-10T16:56:13	1560185773075	9.78756	8.25254	25.9473	2.52758		2019.44	2019-06-10	2019-06-10T12:16:40	1560169000449	3.59527	2.6516	12.0487	0.836439		2019.45	2019-06-12	2019-06-12T13:21:57	1560345717566	2.29093	1.94536	6.32696	0.470074		2019.46	2019-06-14	2019-06-14T16:04:44	1560528284546	15.7195
2019.37	2019-05-12	2019-05-12T23:22:34	1557703354179	14.7822	12.4973	36.8011	3.90443		2019.4	2019-05-25	2019-05-25T09:49:26	1558777766394	20.1731	17.057	54.0673	5.65022		2019.39	2019-05-21	2019-05-21T10:52:26	1558435946071	12.5228	11.0181	30.2084	3.9526		2019.39	2019-05-21	2019-05-21T01:33:20	1558402400610	7.11094	6.21159	16.5092	2.20067		2019.4	2019-05-25	2019-05-25T03:43:54	1558755834999	2.31473	1.9587	6.32696	0.569276		2019.41	2019-05-29	2019-05-29T09:09:28	1559120968490	15.9239
2019.3	2019-04-18	2019-04-18T11:33:51	1555587231005	12.7387	10.5656	35.8047	2.39729		2019.35	2019-05-07	2019-05-07T03:14:09	1557198849374	25.2174	21.3995	63.8799	6.19244		2019.33	2019-05-01	2019-05-01T04:48:39	1556686119067	13.5756	11.447	35.7835	2.60398		2019.33	2019-04-30	2019-04-30T14:50:00	1556635800770	13.602	11.7746	34.5474	3.76318		2019.35	2019-05-06	2019-05-06T18:05:52	1557165952432	2.1655	1.73366	6.32696	0.369597		2019.37	2019-05-13	2019-05-13T02:14:12	1557713652434	19.0519
2019.23	2019-03-24	2019-03-24T23:45:07	1553471107832	4.09541	2.65792	16.1862	0.551421		2019.3	2019-04-18	2019-04-18T20:38:52	1555619932355	17.5573	13.8693	56.4988	1.37223		2019.28	2019-04-10	2019-04-10T22:44:52	1554936292064	6.76766	5.0286	20.8184	1.1287		2019.28	2019-04-10	2019-04-10T04:06:40	1554869200931	18.6039	16.1421	47.338	5.18305		2019.3	2019-04-18	2019-04-18T08:27:49	1555576069865	1.58631	1.26336	5.09343	0.255807		2019.32	2019-04-26	2019-04-26T19:18:56	1556306336378	18.5721
2019.16	2019-02-28	2019-02-28T11:56:24	1551354984658	1.77298	1.28204	6.63373	0.464851		2019.25	2019-03-31	2019-03-31T14:03:35	1554041015335	5.3407	1.918	31.6345	0.196084		2019.22	2019-03-21	2019-03-21T16:41:05	1553186465061	2.35793	1.66648	8.43515	0.325438		2019.22	2019-03-20	2019-03-20T17:23:21	1553102601092	17.6795	15.4565	49.7738	3.73738		2019.25	2019-03-30	2019-03-30T22:49:47	1553986187298	1.2088	0.876439	4.18953	0.240882		2019.28	2019-04-10	2019-04-10T12:23:40	1554899020322	12.6927
2019.1	2019-02-04	2019-02-04T00:07:41	1549238861485	1.40662	1.25467	3.04791	0.66567		2019.2	2019-03-13	2019-03-13T07:28:18	1552462098315	1.53352	0.597872	10.0266	0.16264		2019.17	2019-03-01	2019-03-01T10:37:18	1551436638057	0.974636	0.685106	3.58021	0.235042		2019.16	2019-02-28	2019-02-28T06:40:01	1551336001252	12.504	9.867	41.1954	0.947573		2019.2	2019-03-12	2019-03-12T13:11:44	1552396304732	0.974794	0.682793	3.46141	0.245992		2019.23	2019-03-25	2019-03-25T05:28:24	1553491704266	6.14318
2019.03	2019-01-10	2019-01-10T12:18:58	1547122738311	1.38064	1.26704	2.52253	0.71493		2019.15	2019-02-23	2019-02-23T00:53:01	1550883181296	0.786945	0.513938	2.19288	0.189034		2019.11	2019-02-09	2019-02-09T04:33:31	1549686811053	0.662423	0.548901	1.68591	0.260845		2019.11	2019-02-07	2019-02-07T19:56:41	1549569401413	7.84909	4.9549	31.9224	0.370151		2019.15	2019-02-22	2019-02-22T03:33:42	1550806422165	0.856858	0.665769	2.90912	0.26134		2019.19	2019-03-08	2019-03-08T22:33:08	1552084388210	2.35808
2018.96	2018-12-17	2018-12-17T00:30:15	1545006615138	1.34472	1.25926	2.36746	0.715497		2019.1	2019-02-04	2019-02-04T18:17:44	1549304264276	0.688491	0.566644	1.72974	0.231663		2019.06	2019-01-19	2019-01-19T22:29:44	1547936984049	0.603171	0.542188	1.27535	0.24921		2019.05	2019-01-18	2019-01-18T09:13:21	1547802801575	4.19566	1.82502	22.2785	0.276629		2019.1	2019-02-03	2019-02-03T17:55:39	1549216539598	0.807401	0.669014	2.44296	0.239717		2019.14	2019-02-20	2019-02-20T15:37:52	1550677072154	1.01815
2018.9	2018-11-22	2018-11-22T12:41:31	1542890491964	1.33776	1.25506	2.36195	0.715497		2019.05	2019-01-17	2019-01-17T11:42:27	1547725347256	0.765623	0.663805	1.81222	0.276981		2019	2018-12-30	2018-12-30T16:25:57	1546187157045	0.574808	0.507691	1.22414	0.242273		2019	2018-12-28	2018-12-28T22:30:01	1546036201736	2.15647	0.880776	12.5132	0.26311		2019.05	2019-01-16	2019-01-16T08:17:37	1547626657031	0.783681	0.662517	2.14456	0.224683		2019.1	2019-02-04	2019-02-04T08:42:36	1549269756098	0.561752
2018.83	2018-10-29	2018-10-29T00:52:48	1540774368791	1.33014	1.25506	2.3225	0.715497		2019	2018-12-30	2018-12-30T05:07:10	1546146430237	0.852408	0.755645	1.9789	0.323239		2018.95	2018-12-10	2018-12-10T10:22:10	1544437330042	0.543856	0.481334	1.19383	0.23549		2018.94	2018-12-08	2018-12-08T11:46:41	1544269601897	1.24094	0.672086	6.0772	0.265162		2019	2018-12-28	2018-12-28T22:39:34	1546036774464	0.763698	0.645101	2.07502	0.224683		2019.05	2019-01-19	2019-01-19T01:47:20	1547862440042	0.411544
2018.76	2018-10-04	2018-10-04T13:04:05	1538658245617	1.33014	1.25506	2.3225	0.715497		2018.95	2018-12-11	2018-12-11T22:31:53	1544567513217	0.917027	0.818944	2.07167	0.345902		2018.89	2018-11-20	2018-11-20T04:18:23	1542687503039	0.517834	0.461161	1.17024	0.23549		2018.88	2018-11-18	2018-11-18T01:03:22	1542503002057	0.864374	0.623734	3.33621	0.276992		2018.95	2018-12-10	2018-12-10T13:01:31	1544446891898	0.739436	0.622232	2.00333	0.224548		2019.01	2019-01-02	2019-01-02T18:52:03	1546455123986	0.36444
2018.69	2018-09-10	2018-09-10T01:15:22	1536542122444	1.33014	1.25506	2.3225	0.715497		2018.9	2018-11-23	2018-11-23T15:56:36	1542988596197	0.960723	0.869496	2.12825	0.353423		2018.83	2018-10-30	2018-10-30T22:14:36	1540937676035	0.497511	0.449709	1.05193	0.23549		2018.83	2018-10-28	2018-10-28T14:20:02	1540736402218	0.744723	0.623097	2.14159	0.273743		2018.9	2018-11-22	2018-11-22T03:23:29	1542857009331	0.736932	0.616127	2.00901	0.224548		2018.96	2018-12-17	2018-12-17T11:56:47	1545047807930	0.351298
2018.63	2018-08-16	2018-08-16T13:26:39	1534425999270	1.33014	1.25506	2.3225	0.715497		2018.85	2018-11-05	2018-11-05T09:21:19	1541409679178	0.99479	0.902411	2.18599	0.353423		2018.78	2018-10-10	2018-10-10T16:10:49	1539187849031	0.490548	0.448538	0.996639	0.23549		2018.77	2018-10-08	2018-10-08T03:36:42	1538969802378	0.715308	0.621332	1.6492	0.272108		2018.84	2018-11-03	2018-11-03T17:45:26	1541267126764	0.711866	0.608049	1.94155	0.224548		2018.92	2018-12-01	2018-12-01T05:01:31	1543640491874	0.347805
2018.56	2018-07-23	2018-07-23T01:37:56	1532309876097	1.33014	1.25506	2.3225	0.715497		2018.8	2018-10-18	2018-10-18T02:46:02	1539830762161	1.01108	0.912681	2.2493	0.353639		2018.72	2018-09-20	2018-09-20T10:07:02	1537438022028	0.485882	0.447119	0.915385	0.23549		2018.72	2018-09-17	2018-09-17T16:53:22	1537203202539	0.689815	0.604415	1.53576	0.272108		2018.79	2018-10-16	2018-10-16T08:07:24	1539677244197	0.700469	0.604387	1.86653	0.224548		2018.88	2018-11-14	2018-11-14T22:06:15	1542233175818	0.345231
2018.49	2018-06-28	2018-06-28T13:49:12	1530193752923	1.33014	1.25506	2.3225	0.715497		2018.75	2018-09-29	2018-09-29T20:10:45	1538251845141	1.02509	0.921543	2.27375	0.353639		2018.67	2018-08-31	2018-08-31T04:03:15	1535688195024	0.484426	0.447119	0.911813	0.23549		2018.66	2018-08-28	2018-08-28T06:10:02	1535436602700	0.670282	0.586153	1.48946	0.272108		2018.74	2018-09-27	2018-09-27T22:29:21	1538087361630	0.701147	0.603206	1.86352	0.224548		2018.83	2018-10-29	2018-10-29T15:10:59	1540825859762	0.344685
2018.43	2018-06-04	2018-06-04T02:00:29	1528077629750	1.33014	1.25506	2.3225	0.715497		2018.7	2018-09-11	2018-09-11T13:35:28	1536672928122	1.03435	0.924441	2.37866	0.353639		2018.61	2018-08-10	2018-08-10T21:59:28	1533938368020	0.484426	0.447119	0.911813	0.23549		2018.6	2018-08-07	2018-08-07T19:26:42	1533670002861	0.661474	0.581651	1.45205	0.272108		2018.69	2018-09-09	2018-09-09T12:51:19	1536497479064	0.698901	0.597483	1.86352	0.224548		2018.79	2018-10-13	2018-10-13T08:15:43	1539418543706	0.344381
2018.36	2018-05-10	2018-05-10T14:11:46	1525961506576	1.33014	1.25506	2.3225	0.715497		2018.65	2018-08-24	2018-08-24T07:00:11	1535094011102	1.04022	0.930466	2.38912	0.353639		2018.56	2018-07-21	2018-07-21T15:55:41	1532188541016	0.483764	0.447119	0.908222	0.23549		2018.55	2018-07-18	2018-07-18T08:43:23	1531903403022	0.655961	0.57747	1.43626	0.272108		2018.64	2018-08-22	2018-08-22T03:13:16	1534907596497	0.694572	0.597483	1.81818	0.224548		2018.74	2018-09-27	2018-09-27T01:20:27	1538011227650	0.344381
2018.29	2018-04-16	2018-04-16T02:23:03	1523845383403	1.33014	1.25506	2.3225	0.715497		2018.6	2018-08-06	2018-08-06T00:24:54	1533515094082	1.04311	0.932979	2.39886	0.353639		2018.5	2018-07-01	2018-07-01T09:51:54	1530438714012	0.483764	0.447119	0.908222	0.23549		2018.49	2018-06-27	2018-06-27T22:00:03	1530136803182	0.650176	0.574567	1.43626	0.272108		2018.59	2018-08-03	2018-08-03T17:35:13	1533317713930	0.693993	0.597483	1.81818	0.224548		2018.7	2018-09-10	2018-09-10T18:25:11	1536603911594	0.344381
2018.23	2018-03-22	2018-03-22T14:34:20	1521729260229	1.33014	1.25506	2.3225	0.715497		2018.55	2018-07-18	2018-07-18T17:49:37	1531936177063	1.04336	0.931313	2.39886	0.353639		2018.45	2018-06-11	2018-06-11T03:48:07	1528688887009	0.483764	0.447119	0.908222	0.23549		2018.44	2018-06-07	2018-06-07T11:16:43	1528370203343	0.646815	0.574567	1.40192	0.272108		2018.54	2018-07-16	2018-07-16T07:57:11	1531727831363	0.68949	0.597483	1.80034	0.224548		2018.65	2018-08-25	2018-08-25T11:29:55	1535196595538	0.344381
2018.16	2018-02-26	2018-02-26T02:45:37	1519613137056	1.33014	1.25506	2.3225	0.715497		2018.5	2018-06-30	2018-06-30T11:14:20	1530357260043	1.04379	0.931313	2.39886	0.353639		2018.39	2018-05-21	2018-05-21T21:44:20	1526939060005	0.483764	0.447119	0.908222	0.23549		2018.38	2018-05-18	2018-05-18T00:33:23	1526603603504	0.642721	0.573305	1.40192	0.272108		2018.49	2018-06-27	2018-06-27T22:19:08	1530137948796	0.689327	0.597483	1.7656	0.224548		2018.61	2018-08-09	2018-08-09T04:34:39	1533789279482	0.344381
2018.09	2018-02-01	2018-02-01T14:56:53	1517497013882	1.33014	1.25506	2.3225	0.715497		2018.45	2018-06-12	2018-06-12T04:39:03	1528778343023	1.04428	0.932979	2.39886	0.353639		2018.33	2018-05-01	2018-05-01T15:40:33	1525189233001	0.483764	0.447119	0.908222	0.23549		2018.32	2018-04-27	2018-04-27T13:50:03	1524837003664	0.639643	0.573268	1.39437	0.272108		2018.44	2018-06-09	2018-06-09T12:41:06	1528548066230	0.689327	0.597483	1.7656	0.224548		2018.56	2018-07-23	2018-07-23T21:39:23	1532381963426	0.344381
2018.02	2018-01-08	2018-01-08T03:08:10	1515380890709	1.33014	1.25506	2.3225	0.715497		2018.4	2018-05-24	2018-05-24T22:03:46	1527199426004	1.04446	0.931484	2.40262	0.353639		2018.28	2018-04-11	2018-04-11T09:36:45	1523439405997	0.483764	0.447119	0.908222	0.23549		2018.27	2018-04-07	2018-04-07T03:06:43	1523070403825	0.639001	0.573091	1.39437	0.272108		2018.39	2018-05-22	2018-05-22T03:03:03	1526958183663	0.688618	0.597483	1.7656	0.224548		2018.52	2018-07-07	2018-07-07T14:44:07	1530974647370	0.344381
2017.96	2017-12-14	2017-12-14T15:19:27	1513264767535	1.33014	1.25506	2.3225	0.715497		2018.35	2018-05-06	2018-05-06T15:28:28	1525620508984	1.04411	0.931484	2.40262	0.353639		2018.22	2018-03-22	2018-03-22T03:32:58	1521689578993	0.483764	0.447119	0.908222	0.23549		2018.21	2018-03-17	2018-03-17T16:23:23	1521303803985	0.636804	0.572538	1.37557	0.272108		2018.34	2018-05-03	2018-05-03T17:25:01	1525368301096	0.68776	0.597483	1.75288	0.224548		2018.47	2018-06-21	2018-06-21T07:48:51	1529567331314	0.344381
2017.89	2017-11-20	2017-11-20T03:30:44	1511148644362	1.33014	1.25506	2.3225	0.715497		2018.3	2018-04-18	2018-04-18T08:53:11	1524041591964	1.04411	0.931484	2.40262	0.353639		2018.17	2018-03-01	2018-03-01T21:29:11	1519939751990	0.483764	0.447119	0.908222	0.23549		2018.16	2018-02-25	2018-02-25T05:40:04	1519537204146	0.636354	0.572538	1.37557	0.272108		2018.29	2018-04-15	2018-04-15T07:46:58	1523778418529	0.68776	0.597483	1.75288	0.224548		2018.43	2018-06-05	2018-06-05T00:53:35	1528160015258	0.344381
2017.82	2017-10-26	2017-10-26T15:42:01	1509032521188	1.33014	1.25506	2.3225	0.715497		2018.25	2018-03-31	2018-03-31T02:17:54	1522462674945	1.04411	0.931484	2.40262	0.353639		2018.11	2018-02-09	2018-02-09T15:25:24	1518189924986	0.483764	0.447119	0.908222	0.23549		2018.1	2018-02-04	2018-02-04T18:56:44	1517770604307	0.635194	0.572538	1.37255	0.272108		2018.24	2018-03-27	2018-03-27T22:08:55	1522188535962	0.68776	0.597483	1.75288	0.224548		2018.38	2018-05-19	2018-05-19T17:58:19	1526752699202	0.344381
2017.76	2017-10-02	2017-10-02T03:53:18	1506916398015	1.33014	1.25506	2.3225	0.715497		2018.2	2018-03-12	2018-03-12T19:42:37	1520883757925	1.04411	0.931484	2.40262	0.353639		2018.06	2018-01-20	2018-01-20T09:21:37	1516440097982	0.483764	0.447119	0.908222	0.23549		2018.04	2018-01-15	2018-01-15T08:13:24	1516004004467	0.635194	0.572538	1.37255	0.272108		2018.19	2018-03-09	2018-03-09T12:30:53	1520598653396	0.68776	0.597483	1.75288	0.224548		2018.34	2018-05-03	2018-05-03T11:03:03	1525345383146	0.344381
2017.69	2017-09-07	2017-09-07T16:04:34	1504800274841	1.33014	1.25506	2.3225	0.715497		2018.15	2018-02-22	2018-02-22T13:07:20	1519304840905	1.04411	0.931484	2.40262	0.353639		2018	2017-12-31	2017-12-31T03:17:50	1514690270978	0.483764	0.447119	0.908222	0.23549		2017.99	2017-12-25	2017-12-25T21:30:04	1514237404628	0.635194	0.572538	1.37255	0.272108		2018.14	2018-02-19	2018-02-19T02:52:50	1519008770829	0.68776	0.597483	1.75288	0.224548		2018.3	2018-04-17	2018-04-17T04:07:47	1523938067090	0.344381
2017.62	2017-08-14	2017-08-14T04:15:51	1502684151668	1.33014	1.25506	2.3225	0.715497		2018.1	2018-02-04	2018-02-04T06:32:03	1517725923885	1.04411	0.931484	2.40262	0.353639		2017.95	2017-12-10	2017-12-10T21:14:03	1512940443975	0.483764	0.447119	0.908222	0.23549		2017.93	2017-12-05	2017-12-05T10:46:44	1512470804789	0.635194	0.572538	1.37255	0.272108		2018.09	2018-01-31	2018-01-31T17:14:48	1517418888262	0.68776	0.597483	1.75288	0.224548		2018.25	2018-03-31	2018-03-31T21:12:31	1522530751034	0.344381
2017.55	2017-07-20	2017-07-20T16:27:08	1500568028494	1.33014	1.25506	2.3225	0.715497		2018.05	2018-01-16	2018-01-16T23:56:46	1516147006866	1.04411	0.931484	2.40262	0.353639		2017.89	2017-11-20	2017-11-20T15:10:16	1511190616973	0.483764	0.447119	0.908222	0.23549		2017.88	2017-11-15	2017-11-15T00:03:24	1510704204949	0.635194	0.572538	1.37255	0.272108		2018.04	2018-01-13	2018-01-13T07:36:45	1515829005695	0.68776	0.597483	1.75288	0.224548		2018.21	2018-03-15	2018-03-15T14:17:14	1521123434981	0.344381
2017.49	2017-06-26	2017-06-26T04:38:25	1498451905330	1.33014	1.25506	2.3225	0.715497		2018	2017-12-29	2017-12-29T17:21:29	1514568089846	1.04411	0.931484	2.40262	0.353639		2017.84	2017-10-31	2017-10-31T09:06:29	1509440789969	0.483764	0.447119	0.908222	0.23549		2017.82	2017-10-25	2017-10-25T13:20:05	1508937605110	0.635194	0.572538	1.37255	0.272108		2017.99	2017-12-25	2017-12-25T21:58:43	1514239123128	0.68776	0.597483	1.75288	0.224548		2018.16	2018-02-27	2018-02-27T07:21:58	1519716118925	0.344381
2017.42	2017-06-01	2017-06-01T16:49:42	1496335782156	1.3305	1.25506	2.3225	0.715673		2017.95	2017-12-11	2017-12-11T10:46:12	1512989172826	1.04411	0.931484	2.40262	0.353639		2017.78	2017-10-11	2017-10-11T03:02:42	1507690962965	0.483764	0.447119	0.908222	0.23549		2017.76	2017-10-05	2017-10-05T02:36:45	1507171005270	0.635194	0.572538	1.37255	0.272108		2017.94	2017-12-07	2017-12-07T12:20:40	1512649240562	0.68776	0.597483	1.75288	0.224548		2018.12	2018-02-11	2018-02-11T00:26:42	1518308802869	0.344381
2017.35	2017-05-08	2017-05-08T05:00:58	1494219658983	1.74143	1.51416	4.09054	0.780405		2017.9	2017-11-23	2017-11-23T04:10:55	1511410255808	1.04411	0.931484	2.40262	0.353639		2017.72	2017-09-20	2017-09-20T20:58:55	1505941135961	0.483764	0.447119	0.908222	0.23549		2017.71	2017-09-14	2017-09-14T15:53:25	1505404405433	0.635194	0.572538	1.37255	0.272108		2017.89	2017-11-19	2017-11-19T02:42:37	1511059357995	0.68776	0.597483	1.75288	0.224548		2018.07	2018-01-25	2018-01-25T17:31:26	1516901486813	0.344381
2017.29	2017-04-13	2017-04-13T17:12:15	1492103535809	2.32515	2.11842	4.90206	0.991828		2017.85	2017-11-04	2017-11-04T21:35:38	1509831338788	1.04411	0.931484	2.40262	0.353639		2017.67	2017-08-31	2017-08-31T14:55:08	1504191308958	0.483764	0.447119	0.908222	0.23549		2017.65	2017-08-25	2017-08-25T05:10:05	1503637805594	0.635194	0.572538	1.37255	0.272108		2017.84	2017-10-31	2017-10-31T17:04:35	1509469475428	0.68776	0.597483	1.75288	0.224548		2018.03	2018-01-09	2018-01-09T10:36:10	1515494170757	0.344381
2017.22	2017-03-20	2017-03-20T05:23:32	1489987412636	2.38301	2.16747	4.92094	1.01208		2017.8	2017-10-17	2017-10-17T15:00:21	1508252421768	1.04411	0.931484	2.40262	0.353639		2017.61	2017-08-11	2017-08-11T08:51:21	1502441481954	0.483764	0.447119	0.908222	0.23549		2017.6	2017-08-04	2017-08-04T18:26:45	1501871205754	0.635194	0.572538	1.37255	0.272108		2017.79	2017-10-13	2017-10-13T07:26:32	1507879592861	0.68776	0.597483	1.75288	0.224548		2017.98	2017-12-24	2017-12-24T03:40:54	1514086854701	0.344381
2017.15	2017-02-23	2017-02-23T17:34:49	1487871289463	2.38261	2.16671	4.92094	1.01208		2017.75	2017-09-29	2017-09-29T08:25:04	1506673504749	1.04411	0.931484	2.40262	0.353639		2017.56	2017-07-22	2017-07-22T02:47:34	1500691654950	0.483764	0.447119	0.908222	0.23549		2017.54	2017-07-15	2017-07-15T07:43:25	1500104605915	0.635194	0.572538	1.37255	0.272108		2017.74	2017-09-24	2017-09-24T21:48:30	1506289710294	0.68776	0.597483	1.75288	0.224548		2017.94	2017-12-07	2017-12-07T20:45:38	1512679538645	0.344381
2017.08	2017-01-30	2017-01-30T05:46:06	1485755166290	2.38442	2.16747	4.92094	1.01208		2017.7	2017-09-11	2017-09-11T01:49:47	1505094587729	1.04411	0.931484	2.40262	0.353639		2017.5	2017-07-01	2017-07-01T20:43:47	1498941827946	0.483764	0.447119	0.908222	0.23549		2017.48	2017-06-24	2017-06-24T21:00:06	1498338006075	0.635194	0.572538	1.37255	0.272108		2017.69	2017-09-06	2017-09-06T12:10:27	1504699827728	0.68776	0.597483	1.75288	0.224548		2017.89	2017-11-21	2017-11-21T13:50:22	1511272222589	0.344381
2017.02	2017-01-05	2017-01-05T17:57:23	1483639043117	2.38794	2.16976	5.01537	1.01208		2017.65	2017-08-23	2017-08-23T19:14:30	1503515670709	1.04411	0.931484	2.40262	0.353639		2017.45	2017-06-11	2017-06-11T14:40:00	1497192000943	0.483764	0.447119	0.908222	0.23549		2017.43	2017-06-04	2017-06-04T10:16:46	1496571406236	0.635194	0.572538	1.37255	0.272108		2017.63	2017-08-19	2017-08-19T02:32:25	1503109945161	0.68776	0.597483	1.75288	0.224548		2017.85	2017-11-05	2017-11-05T06:55:06	1509864906533	0.344381
2016.95	2016-12-11	2016-12-11T06:08:39	1481436519943	2.38794	2.16976	5.01537	1.01208		2017.6	2017-08-05	2017-08-05T12:39:13	1501936753690	1.04411	0.931484	2.40262	0.353639		2017.39	2017-05-22	2017-05-22T08:36:13	1495442173939	0.483764	0.447119	0.908222	0.23549		2017.37	2017-05-14	2017-05-14T23:33:26	1494804806397	0.635194	0.572538	1.37255	0.272108		2017.58	2017-07-31	2017-07-31T16:54:22	1501520062594	0.68776	0.597483	1.75288	0.224548		2017.8	2017-10-19	2017-10-19T23:59:50	1508457590477	0.344381
2016.88	2016-11-16	2016-11-16T18:19:56	1479320396770	2.38794	2.16976	5.01537	1.01208		2017.55	2017-07-18	2017-07-18T06:03:56	1500357836670	1.04411	0.931484	2.40262	0.353639		2017.34	2017-05-02	2017-05-02T02:32:26	1493692346935	0.483764	0.447119	0.908222	0.23549		2017.32	2017-04-24	2017-04-24T12:50:06	1493038206558	0.635194	0.572538	1.37255	0.272108		2017.53	2017-07-13	2017-07-13T07:16:20	1499930180027	0.68776	0.597483	1.75288	0.224548		2017.76	2017-10-03	2017-10-03T17:04:34	1507050274421	0.344381
2016.82	2016-10-23	2016-10-23T06:31:13	1477204273596	2.38794	2.16976	5.01537	1.01208		2017.5	2017-06-29	2017-06-29T23:28:39	1498778919650	1.04411	0.931484	2.40262	0.353639		2017.28	2017-04-11	2017-04-11T20:28:39	1491942519931	0.483764	0.447119	0.908222	0.23549		2017.26	2017-04-04	2017-04-04T02:06:46	1491271606719	0.635194	0.572538	1.37255	0.272108		2017.48	2017-06-24	2017-06-24T21:38:17	1498340297460	0.68776	0.597483	1.75288	0.224548		2017.71	2017-09-17	2017-09-17T10:09:18	1505642958365	0.344381
2016.75	2016-09-28	2016-09-28T18:42:30	1475088150423	2.38794	2.16976	5.01537	1.01208		2017.45	2017-06-11	2017-06-11T16:53:22	1497200002631	1.04411	0.931484	2.40262	0.353639		2017.23	2017-03-22	2017-03-22T14:24:52	1490192692927	0.483764	0.447119	0.908222	0.23549		2017.2	2017-03-14	2017-03-14T15:23:26	1489505006879	0.635194	0.572538	1.37255	0.272108		2017.43	2017-06-06	2017-06-06T12:00:14	1496750414893	0.68776	0.597483	1.75288	0.224548		2017.67	2017-09-01	2017-09-01T03:14:02	1504235642309	0.344381
2016.68	2016-09-04	2016-09-04T06:53:47	1472972027249	2.38794	2.16976	5.01537	1.01208		2017.4	2017-05-24	2017-05-24T10:18:05	1495621085611	1.04411	0.931484	2.40262	0.353639		2017.17	2017-03-02	2017-03-02T08:21:05	1488442865924	0.483764	0.447119	0.908222	0.23549		2017.15	2017-02-22	2017-02-22T04:40:07	1487738407040	0.635194	0.572538	1.37255	0.272108		2017.38	2017-05-19	2017-05-19T02:22:12	1495160532327	0.689852	0.601986	1.75288	0.238797		2017.63	2017-08-15	2017-08-15T20:18:46	1502828326253	0.344381
2016.61	2016-08-10	2016-08-10T19:05:04	1470855904076	2.38794	2.16976	5.01537	1.01208		2017.35	2017-05-06	2017-05-06T03:42:48	1494042168591	1.04411	0.931484	2.40262	0.353639		2017.11	2017-02-10	2017-02-10T02:17:18	1486693038920	0.483764	0.447119	0.908222	0.23549		2017.09	2017-02-01	2017-02-01T17:56:47	1485971807201	0.635194	0.572538	1.37255	0.272108		2017.33	2017-04-30	2017-04-30T16:44:09	1493570649760	0.764198	0.666023	1.94155	0.272121		2017.58	2017-07-30	2017-07-30T13:23:30	1501421010197	0.344381
2016.55	2016-07-17	2016-07-17T07:16:20	1468739780902	2.38794	2.16976	5.01537	1.01208		2017.3	2017-04-17	2017-04-17T21:07:31	1492463251572	1.04411	0.931484	2.40262	0.353639		2017.06	2017-01-20	2017-01-20T20:13:31	1484943211916	0.483764	0.447119	0.908222	0.23549		2017.04	2017-01-12	2017-01-12T07:13:27	1484205207361	0.635194	0.572538	1.37255	0.272108		2017.28	2017-04-12	2017-04-12T07:06:07	1491980767193	0.796949	0.706235	2.0023	0.250131		2017.54	2017-07-14	2017-07-14T06:28:14	1500013694141	0.344381
2016.48	2016-06-22	2016-06-22T19:27:37	1466623657729	2.38794	2.16976	5.01537	1.01208		2017.25	2017-03-30	2017-03-30T14:32:14	1490884334553	1.04411	0.931484	2.40262	0.353639		2017	2016-12-31	2016-12-31T14:09:44	1483193384912	0.483764	0.447119	0.908222	0.23549		2016.98	2016-12-21	2016-12-21T20:30:07	1482352207522	0.635194	0.572538	1.37255	0.272108		2017.23	2017-03-24	2017-03-24T21:28:04	1490390884626	0.809469	0.706235	2.07567	0.247736		2017.49	2017-06-27	2017-06-27T23:32:58	1498606378085	0.344381
2016.41	2016-05-29	2016-05-29T07:38:54	1464507534555	2.38794	2.16976	5.01537	1.01208		2017.2	2017-03-12	2017-03-12T07:56:57	1489305417533	1.04411	0.931484	2.40262	0.353639		2016.95	2016-12-10	2016-12-10T08:05:57	1481357157908	0.483764	0.447119	0.908222	0.23549		2016.92	2016-12-01	2016-12-01T09:46:47	1480585607682	0.635194	0.572538	1.37255	0.272108		2017.18	2017-03-06	2017-03-06T11:50:02	1488801002059	0.815774	0.690935	2.09202	0.247736		2017.45	2017-06-11	2017-06-11T16:37:42	1497199062029	0.344381
2016.35	2016-05-04	2016-05-04T19:50:11	1462391411382	2.38794	2.16976	5.01537	1.01208		2017.15	2017-02-22	2017-02-22T01:21:40	1487726500514	1.04411	0.931484	2.40262	0.353639		2016.89	2016-11-20	2016-11-20T02:02:10	1479607330905	0.483764	0.447119	0.908222	0.23549		2016.87	2016-11-10	2016-11-10T23:03:27	1478819007843	0.635194	0.572538	1.37255	0.272108		2017.13	2017-02-16	2017-02-16T02:11:59	1487211119493	0.817588	0.679307	2.14175	0.247736		2017.4	2017-05-26	2017-05-26T09:42:25	1495791745973	0.344381
2016.28	2016-04-10	2016-04-10T08:01:28	1460275288208	2.38794	2.16976	5.01537	1.01208		2017.1	2017-02-03	2017-02-03T18:46:23	1486147583494	1.04411	0.931484	2.40262	0.353639		2016.84	2016-10-30	2016-10-30T19:58:23	1477857503901	0.483764	0.447119	0.908222	0.23549		2016.81	2016-10-21	2016-10-21T12:20:08	1477052408004	0.635194	0.572538	1.37255	0.272108		2017.08	2017-01-28	2017-01-28T16:33:56	1485621236926	0.807886	0.673684	2.09202	0.247736		2017.36	2017-05-10	2017-05-10T02:47:09	1494384429917	0.399675
2016.21	2016-03-16	2016-03-16T20:12:45	1458159165035	2.38794	2.16976	5.01537	1.01208		2017.05	2017-01-16	2017-01-16T12:11:06	1484568666474	1.04411	0.931484	2.40262	0.353639		2016.78	2016-10-10	2016-10-10T13:54:36	1476107676897	0.483764	0.447119	0.908222	0.23549		2016.76	2016-10-01	2016-10-01T01:36:48	1475285808164	0.635194	0.572538	1.37255	0.272108		2017.03	2017-01-10	2017-01-10T06:55:54	1484031354359	0.809577	0.672765	2.09202	0.247736		2017.31	2017-04-23	2017-04-23T19:51:53	1492977113861	0.737835
2016.14	2016-02-21	2016-02-21T08:24:01	1456043041861	2.38794	2.16976	5.01537	1.01208		2017	2016-12-28	2016-12-28T05:35:49	1482903349455	1.04411	0.931484	2.40262	0.353639		2016.73	2016-09-20	2016-09-20T07:50:49	1474357849893	0.483764	0.447119	0.908222	0.23549		2016.7	2016-09-10	2016-09-10T14:53:28	1473519208326	0.635194	0.572538	1.37255	0.272108		2016.98	2016-12-21	2016-12-21T21:17:51	1482355071792	0.807977	0.672146	2.07567	0.247736		2017.27	2017-04-07	2017-04-07T12:56:37	1491569797805	0.965262
2016.08	2016-01-27	2016-01-27T20:35:18	1453926918688	2.38794	2.16976	5.01537	1.01208		2016.95	2016-12-09	2016-12-09T23:00:32	1481324432435	1.04411	0.931484	2.40262	0.353639		2016.67	2016-08-31	2016-08-31T01:47:02	1472608022890	0.483764	0.447119	0.908222	0.23549		2016.64	2016-08-21	2016-08-21T04:10:08	1471752608487	0.635194	0.572538	1.37255	0.272108		2016.93	2016-12-03	2016-12-03T11:39:49	1480765189225	0.80706	0.667117	2.07567	0.247736		2017.22	2017-03-22	2017-03-22T06:01:21	1490162481749	1.08324
2016.01	2016-01-03	2016-01-03T08:46:35	1451810795514	2.38794	2.16976	5.01537	1.01208		2016.9	2016-11-21	2016-11-21T16:25:15	1479745515415	1.04411	0.931484	2.40262	0.353639		2016.61	2016-08-10	2016-08-10T19:43:15	1470858195886	0.483764	0.447119	0.908222	0.23549		2016.59	2016-07-31	2016-07-31T17:26:48	1469986008647	0.635194	0.572538	1.37255	0.272108		2016.88	2016-11-15	2016-11-15T02:01:46	1479175306659	0.807131	0.666041	2.13079	0.247736		2017.18	2017-03-05	2017-03-05T23:06:05	1488755165693	1.12074
2015.94	2015-12-09	2015-12-09T20:57:52	1449694672341	2.38794	2.16976	5.01537	1.01208		2016.85	2016-11-03	2016-11-03T09:49:58	1478166598396	1.04411	0.931484	2.40262	0.353639		2016.56	2016-07-21	2016-07-21T13:39:28	1469108368882	0.483764	0.447119	0.908222	0.23549		2016.53	2016-07-11	2016-07-11T06:43:28	1468219408808	0.635194	0.572538	1.37255	0.272108		2016.83	2016-10-27	2016-10-27T16:23:44	1477585424092	0.80545	0.666041	2.13079	0.247736		2017.13	2017-02-17	2017-02-17T16:10:49	1487347849637	1.14038
2015.88	2015-11-15	2015-11-15T09:09:09	1447578549167	2.38794	2.16976	5.01537	1.01208		2016.8	2016-10-16	2016-10-16T03:14:41	1476587681376	1.04411	0.931484	2.40262	0.353639		2016.5	2016-07-01	2016-07-01T07:35:41	1467358541878	0.524492	0.454485	1.00824	0.242273		2016.48	2016-06-20	2016-06-20T20:00:08	1466452808968	0.635194	0.572538	1.37255	0.272108		2016.78	2016-10-09	2016-10-09T06:45:41	1475995541525	0.804621	0.666041	2.08206	0.247736		2017.09	2017-02-01	2017-02-01T09:15:33	1485940533581	1.15014
2015.81	2015-10-21	2015-10-21T21:20:25	1445462425994	2.38794	2.16976	5.01537	1.01208		2016.75	2016-09-27	2016-09-27T20:39:24	1475008764356	1.04411	0.931484	2.40262	0.353639		2016.45	2016-06-11	2016-06-11T01:31:54	1465608714874	1.23355	0.560238	5.78107	0.272211		2016.42	2016-05-31	2016-05-31T09:16:49	1464686209130	0.648484	0.573305	1.40192	0.273743		2016.73	2016-09-20	2016-09-20T21:07:38	1474405658958	0.804621	0.666041	2.08206	0.247736		2017.05	2017-01-16	2017-01-16T02:20:17	1484533217525	1.15187
2015.74	2015-09-27	2015-09-27T09:31:42	1443346302820	2.38794	2.16976	5.01537	1.01208		2016.7	2016-09-09	2016-09-09T14:04:07	1473429847336	1.04411	0.931484	2.40262	0.353639		2016.39	2016-05-21	2016-05-21T19:28:07	1463858887871	2.04836	1.26389	6.4534	0.316233		2016.36	2016-05-10	2016-05-10T22:33:29	1462919609291	0.717253	0.585323	1.76779	0.289167		2016.68	2016-09-02	2016-09-02T11:29:36	1472815776391	0.805316	0.666041	2.13079	0.247736		2017	2016-12-30	2016-12-30T19:25:01	1483125901469	1.15224
2015.68	2015-09-02	2015-09-02T21:42:59	1441230179647	2.38794	2.16976	5.01537	1.01208		2016.65	2016-08-22	2016-08-22T07:28:50	1471850930317	1.04411	0.931484	2.40262	0.353639		2016.34	2016-05-01	2016-05-01T13:24:20	1462109060867	2.69555	2.3435	6.93363	0.36802		2016.31	2016-04-20	2016-04-20T11:50:09	1461153009451	0.895959	0.613213	4.64265	0.296802		2016.63	2016-08-15	2016-08-15T01:51:33	1471225893825	0.805316	0.666041	2.13079	0.247736		2016.96	2016-12-13	2016-12-13T12:29:45	1481632185413	1.15224
2015.61	2015-08-09	2015-08-09T09:54:16	1439114056473	4.23886	3.72572	10.1626	1.61236		2016.6	2016-08-04	2016-08-04T00:53:33	1470272013297	1.04411	0.931484	2.40262	0.353639		2016.28	2016-04-11	2016-04-11T07:20:33	1460359233863	3.15614	2.89939	7.28239	0.487027		2016.25	2016-03-31	2016-03-31T01:06:49	1459386409612	1.19039	0.680782	5.78893	0.329522		2016.58	2016-07-27	2016-07-27T16:13:31	1469636011258	0.805316	0.666041	2.13079	0.247736		2016.91	2016-11-27	2016-11-27T05:34:29	1480224869357	1.15324
2015.54	2015-07-15	2015-07-15T22:05:33	1436997933300	5.27517	4.73432	11.8501	1.50064		2016.55	2016-07-16	2016-07-16T18:18:16	1468693096277	1.04411	0.931484	2.40262	0.353639		2016.23	2016-03-22	2016-03-22T01:16:46	1458609406859	3.29446	3.0164	7.31843	0.703491		2016.19	2016-03-10	2016-03-10T14:23:29	1457619809772	1.50468	0.763247	6.7196	0.336892		2016.53	2016-07-09	2016-07-09T06:35:28	1468046128691	0.821464	0.674233	2.19639	0.250131		2016.87	2016-11-10	2016-11-10T22:39:13	1478817553301	1.15324
2015.47	2015-06-21	2015-06-21T10:16:50	1434881810126	4.74549	3.82173	14.3036	1.06657		2016.5	2016-06-28	2016-06-28T11:42:59	1467114179258	1.05937	0.938174	2.49636	0.361915		2016.17	2016-03-01	2016-03-01T19:12:59	1456859579855	3.36107	3.07737	7.31843	0.85151		2016.14	2016-02-19	2016-02-19T03:40:09	1455853209933	1.86197	0.922794	7.5624	0.352013		2016.48	2016-06-20	2016-06-20T20:57:26	1466456246124	0.99535	0.792494	2.91871	0.304307		2016.82	2016-10-25	2016-10-25T15:43:57	1477410237245	1.15324
2015.41	2015-05-27	2015-05-27T22:28:06	1432765686953	3.13225	2.57127	8.88076	0.779876		2016.45	2016-06-10	2016-06-10T05:07:42	1465535262238	1.12025	0.965092	2.78277	0.37371		2016.12	2016-02-10	2016-02-10T13:09:12	1455109752852	3.37885	3.08757	7.31843	0.903298		2016.08	2016-01-29	2016-01-29T16:56:50	1454086610094	2.19915	1.21884	7.72395	0.371441		2016.42	2016-06-02	2016-06-02T11:19:23	1464866363557	1.241	0.918364	4.22961	0.363285		2016.78	2016-10-09	2016-10-09T08:48:41	1476002921189	1.15324
2015.34	2015-05-03	2015-05-03T10:39:23	1430649563779	2.11282	1.82361	5.59465	0.804567		2016.4	2016-05-22	2016-05-22T22:32:25	1463956345218	1.27884	1.031	4.02572	0.410926		2016.06	2016-01-21	2016-01-21T07:05:25	1453359925848	3.38356	3.08956	7.31843	0.939719		2016.03	2016-01-09	2016-01-09T06:13:30	1452320010254	2.58242	1.65029	8.86806	0.401382		2016.37	2016-05-15	2016-05-15T01:41:20	1463276480991	1.47608	1.06231	4.8173	0.390946		2016.73	2016-09-23	2016-09-23T01:53:25	1474595605133	1.15324
2015.27	2015-04-08	2015-04-08T22:50:40	1428533440606	1.85946	1.68665	4.07812	0.74999		2016.35	2016-05-04	2016-05-04T15:57:08	1462377428200	1.46382	1.1003	5.38709	0.434661		2016	2016-01-01	2016-01-01T01:01:38	1451610098844	3.39018	3.09639	7.31843	0.95745		2015.97	2015-12-19	2015-12-19T19:30:10	1450553410415	2.90063	2.18892	9.17341	0.460178		2016.32	2016-04-26	2016-04-26T16:03:18	1461686598424	1.65407	1.21176	5.74942	0.398619		2016.69	2016-09-06	2016-09-06T18:58:09	1473188289077	1.15324
2015.21	2015-03-15	2015-03-15T11:01:57	1426417317432	1.75522	1.62831	3.58268	0.746924		2016.3	2016-04-16	2016-04-16T09:21:51	1460798511180	1.63757	1.17043	6.08648	0.449801		2015.95	2015-12-11	2015-12-11T18:57:51	1449860271840	3.39018	3.09639	7.31843	0.95745		2015.91	2015-11-29	2015-11-29T08:46:50	1448786810575	3.1377	2.49712	9.47153	0.52293		2016.27	2016-04-08	2016-04-08T06:25:15	1460096715857	1.79246	1.32041	6.16593	0.398619		2016.64	2016-08-21	2016-08-21T12:02:53	1471780973021	1.15324
2015.14	2015-02-18	2015-02-18T23:13:14	1424301194259	1.69438	1.60016	3.17371	0.742603		2016.25	2016-03-29	2016-03-29T02:46:34	1459219594160	1.84171	1.26829	6.644	0.506529		2015.89	2015-11-21	2015-11-21T12:54:04	1448110444837	3.39018	3.09639	7.31843	0.95745		2015.86	2015-11-08	2015-11-08T22:03:30	1447020210736	3.29488	2.72023	9.64793	0.581651		2016.22	2016-03-20	2016-03-20T20:47:13	1458506833290	1.83597	1.35251	6.35966	0.398619		2016.6	2016-08-05	2016-08-05T05:07:36	1470373656965	1.15324
2015.07	2015-01-25	2015-01-25T11:24:31	1422185071085	1.68101	1.5979	3.09608	0.742603		2016.2	2016-03-10	2016-03-10T20:11:17	1457640677141	2.03485	1.38143	7.25999	0.527432		2015.84	2015-11-01	2015-11-01T06:50:17	1446360617836	3.39018	3.09639	7.31843	0.95745		2015.8	2015-10-19	2015-10-19T11:20:10	1445253610897	3.38553	2.842	9.86807	0.594736		2016.17	2016-03-02	2016-03-02T11:09:10	1456916950723	1.89568	1.39523	6.59169	0.398619		2016.55	2016-07-19	2016-07-19T22:12:20	1468966340909	1.15324
2015	2014-12-31	2014-12-31T23:35:47	1420068947912	1.6752	1.5979	3.05252	0.742603		2016.15	2016-02-21	2016-02-21T13:36:00	1456061760121	2.21328	1.49637	7.84402	0.586005		2015.78	2015-10-12	2015-10-12T00:46:30	1444610790832	3.39018	3.09639	7.31843	0.95745		2015.75	2015-09-29	2015-09-29T00:36:51	1443487011057	3.50186	2.93162	10.4233	0.664169		2016.12	2016-02-13	2016-02-13T01:31:08	1455327068157	1.95255	1.42827	6.7705	0.398619		2016.51	2016-07-03	2016-07-03T15:17:04	1467559024853	1.15324
2014.94	2014-12-07	2014-12-07T11:47:04	1417952824738	1.6752	1.5979	3.05252	0.742603		2016.1	2016-02-03	2016-02-03T07:00:43	1454482843101	2.39091	1.59772	8.35858	0.61816		2015.73	2015-09-21	2015-09-21T18:42:43	1442860963828	3.39018	3.09639	7.31843	0.95745		2015.69	2015-09-08	2015-09-08T13:53:31	1441720411218	3.58846	3.00762	10.4268	0.681437		2016.07	2016-01-25	2016-01-25T15:53:05	1453737185590	1.96544	1.44554	6.83916	0.392648		2016.47	2016-06-17	2016-06-17T08:21:48	1466151708797	1.15324
2014.87	2014-11-12	2014-11-12T23:58:21	1415836701565	1.67336	1.5979	3.04868	0.742603		2016.05	2016-01-16	2016-01-16T00:25:26	1452903926082	2.52081	1.68839	9.30039	0.631783		2015.67	2015-09-01	2015-09-01T12:38:56	1441111136824	3.39018	3.09639	7.31843	0.95745		2015.63	2015-08-19	2015-08-19T03:10:11	1439953811378	3.89146	3.29663	10.913	0.813309		2016.02	2016-01-07	2016-01-07T06:15:03	1452147303023	1.98629	1.44666	6.92405	0.392648		2016.42	2016-06-01	2016-06-01T01:26:32	1464744392741	1.15324
2014.8	2014-10-19	2014-10-19T12:09:38	1413720578392	1.67336	1.5979	3.04868	0.742603		2016	2015-12-28	2015-12-28T17:50:09	1451325009062	2.70233	1.85152	9.56275	0.660961		2015.62	2015-08-12	2015-08-12T06:35:09	1439361309821	3.39018	3.09639	7.31843	0.95745		2015.58	2015-07-29	2015-07-29T16:26:51	1438187211539	4.27812	3.70098	11.1631	1.21884		2015.97	2015-12-19	2015-12-19T20:37:00	1450557420456	1.98977	1.44666	6.92405	0.392648		2016.38	2016-05-15	2016-05-15T18:31:16	1463337076685	1.15324
2014.74	2014-09-25	2014-09-25T00:20:55	1411604455218	1.67336	1.5979	3.04868	0.742603		2015.95	2015-12-10	2015-12-10T11:14:52	1449746092042	2.8791	2.00229	9.74154	0.69643		2015.56	2015-07-23	2015-07-23T00:31:22	1437611482817	4.03322	3.86266	7.79514	1.43382		2015.52	2015-07-09	2015-07-09T05:43:31	1436420611700	4.9381	4.29316	12.1272	1.24588		2015.92	2015-12-01	2015-12-01T10:58:57	1448967537889	2.00596	1.44666	7.27417	0.392648		2016.33	2016-04-29	2016-04-29T11:36:00	1461929760629	1.15324
2014.67	2014-08-31	2014-08-31T12:32:12	1409488332045	1.67336	1.5979	3.04868	0.742603		2015.9	2015-11-22	2015-11-22T04:39:35	1448167175023	3.00006	2.15568	9.85722	0.707533		2015.5	2015-07-02	2015-07-02T18:27:35	1435861655813	2.49412	2.19467	6.38346	0.676538		2015.47	2015-06-18	2015-06-18T19:00:11	1434654011860	3.31172	2.52294	10.2966	0.525858		2015.87	2015-11-13	2015-11-13T01:20:55	1447377655323	2.02225	1.44665	7.32935	0.392648		2016.29	2016-04-13	2016-04-13T04:40:44	1460522444573	1.15324
2014.6	2014-08-07	2014-08-07T00:43:28	1407372208871	1.67336	1.5979	3.04868	0.742603		2015.85	2015-11-03	2015-11-03T22:04:18	1446588258003	3.14073	2.30497	10.0016	0.730134		2015.45	2015-06-12	2015-06-12T12:23:48	1434111828809	1.06983	0.850975	3.11517	0.274877		2015.41	2015-05-29	2015-05-29T08:16:52	1432887412021	1.96019	1.45429	6.71806	0.402227		2015.82	2015-10-25	2015-10-25T15:42:52	1445787772756	2.03271	1.45701	7.32935	0.392648		2016.24	2016-03-27	2016-03-27T21:45:28	1459115128518	1.15324
2014.53	2014-07-13	2014-07-13T12:54:45	1405256085698	1.67336	1.5979	3.04868	0.742603		2015.8	2015-10-16	2015-10-16T15:29:00	1445009340983	3.27619	2.46688	10.2846	0.764075		2015.39	2015-05-23	2015-05-23T06:20:01	1432362001806	0.824109	0.706872	2.14551	0.269266		2015.35	2015-05-08	2015-05-08T21:33:32	1431120812181	1.27428	0.960149	4.28397	0.301684		2015.77	2015-10-07	2015-10-07T06:04:50	1444197890189	2.04317	1.44666	7.43119	0.392648		2016.2	2016-03-11	2016-03-11T14:50:12	1457707812462	1.15324
2014.47	2014-06-19	2014-06-19T01:06:02	1403139962524	1.67336	1.5979	3.04868	0.742603		2015.74	2015-09-28	2015-09-28T08:53:43	1443430423964	3.38184	2.54774	10.5929	0.780497		2015.34	2015-05-03	2015-05-03T00:16:14	1430612174803	0.71612	0.631604	1.75061	0.268382		2015.3	2015-04-18	2015-04-18T10:50:12	1429354212342	0.976	0.750195	2.857	0.289755		2015.72	2015-09-18	2015-09-18T20:26:47	1442608007622	2.03672	1.44665	7.43119	0.392648		2016.15	2016-02-24	2016-02-24T07:54:56	1456300496406	1.15324
2014.4	2014-05-25	2014-05-25T13:17:19	1401023839351	1.67336	1.5979	3.04868	0.742603		2015.69	2015-09-10	2015-09-10T02:18:26	1441851506944	3.52537	2.69485	11.1233	0.796442		2015.28	2015-04-12	2015-04-12T18:12:27	1428862347799	0.684749	0.627972	1.38822	0.268382		2015.24	2015-03-29	2015-03-29T00:06:52	1427587612503	0.834631	0.680722	2.66095	0.287614		2015.67	2015-08-31	2015-08-31T10:48:45	1441018125055	2.04209	1.44666	7.43119	0.392648		2016.11	2016-02-08	2016-02-08T00:59:40	1454893180350	1.15324
2014.33	2014-05-01	2014-05-01T01:28:36	1398907716177	1.67336	1.5979	3.04868	0.742603		2015.64	2015-08-22	2015-08-22T19:43:09	1440272589924	3.88074	3.03967	11.7257	0.852829		2015.23	2015-03-23	2015-03-23T12:08:40	1427112520795	0.677299	0.627972	1.36281	0.268382		2015.19	2015-03-08	2015-03-08T13:23:32	1425821012663	0.781247	0.675028	1.96382	0.287614		2015.62	2015-08-13	2015-08-13T01:10:42	1439428242489	2.40754	1.84625	7.53874	0.6385		2016.06	2016-01-22	2016-01-22T18:04:24	1453485864294	1.15324
2014.27	2014-04-06	2014-04-06T13:39:53	1396791593004	1.67336	1.5979	3.04868	0.742603		2015.59	2015-08-04	2015-08-04T13:07:52	1438693672905	4.52065	3.63634	12.8526	1.08562		2015.17	2015-03-03	2015-03-03T06:04:53	1425362693791	0.675933	0.627972	1.34777	0.268382		2015.13	2015-02-16	2015-02-16T02:40:12	1424054412824	0.762273	0.673836	1.78608	0.287614		2015.57	2015-07-25	2015-07-25T15:32:39	1437838359922	3.31492	2.59032	9.81611	0.731894		2016.02	2016-01-06	2016-01-06T11:09:08	1452078548238	1.15324
2014.2	2014-03-13	2014-03-13T01:51:09	1394675469830	1.67336	1.5979	3.04868	0.742603		2015.54	2015-07-17	2015-07-17T06:32:35	1437114755885	5.29138	4.30219	13.8625	1.28611		2015.12	2015-02-11	2015-02-11T00:01:06	1423612866788	0.675933	0.627972	1.34777	0.268382		2015.07	2015-01-26	2015-01-26T15:56:52	1422287812985	0.752488	0.673836	1.56729	0.287614		2015.52	2015-07-07	2015-07-07T05:54:37	1436248477355	3.04827	2.44167	9.09899	0.483128		2015.97	2015-12-21	2015-12-21T04:13:52	1450671232182	1.15324
2014.13	2014-02-16	2014-02-16T14:02:26	1392559346657	1.67336	1.5979	3.04868	0.742603		2015.49	2015-06-28	2015-06-28T23:57:18	1435535838865	3.96065	2.94785	12.9461	0.456905		2015.06	2015-01-21	2015-01-21T17:57:19	1421863039784	0.675933	0.627972	1.34777	0.268382		2015.02	2015-01-06	2015-01-06T05:13:33	1420521213145	0.745749	0.673836	1.56081	0.287614		2015.47	2015-06-18	2015-06-18T20:16:34	1434658594788	2.4272	1.77966	7.81798	0.398062		2015.93	2015-12-04	2015-12-04T21:18:36	1449263916126	1.15324
2014.06	2014-01-23	2014-01-23T02:13:43	1390443223483	1.67336	1.5979	3.04868	0.742603		2015.44	2015-06-10	2015-06-10T17:22:01	1433956921846	2.03983	1.10992	9.45255	0.109371		2015.01	2015-01-01	2015-01-01T11:53:32	1420113212780	0.675933	0.627972	1.34777	0.268382		2014.96	2014-12-16	2014-12-16T18:30:13	1418754613306	0.745749	0.673836	1.56081	0.287614		2015.42	2015-05-31	2015-05-31T10:38:32	1433068712221	1.88962	1.37504	6.81943	0.266659		2015.89	2015-11-18	2015-11-18T14:23:20	1447856600070	1.15324
2014	2013-12-29	2013-12-29T14:25:00	1388327100310	1.67336	1.5979	3.04868	0.742603		2015.39	2015-05-23	2015-05-23T10:46:44	1432378004826	1.18337	0.610238	6.09635	0.0872044		2014.95	2014-12-12	2014-12-12T05:49:45	1418363385776	0.675933	0.627972	1.34777	0.268382		2014.91	2014-11-26	2014-11-26T07:46:53	1416988013466	0.745749	0.673836	1.56081	0.287614		2015.37	2015-05-13	2015-05-13T01:00:29	1431478829654	1.54326	1.10569	5.39389	0.205771		2015.84	2015-11-02	2015-11-02T07:28:04	1446449284014	1.15324
2013.93	2013-12-05	2013-12-05T02:36:17	1386210977136	1.67336	1.5979	3.04868	0.742603		2015.34	2015-05-05	2015-05-05T04:11:27	1430799087806	0.710162	0.341581	3.51211	0.0872044		2014.89	2014-11-21	2014-11-21T23:45:58	1416613558772	0.675933	0.627972	1.34777	0.268382		2014.85	2014-11-05	2014-11-05T21:03:33	1415221413627	0.745749	0.673836	1.56081	0.287614		2015.32	2015-04-24	2015-04-24T15:22:27	1429888947088	1.31417	0.894997	5.0901	0.167559		2015.8	2015-10-17	2015-10-17T00:32:47	1445041967963	1.15324
2013.86	2013-11-10	2013-11-10T14:47:33	1384094853963	1.67336	1.5979	3.04868	0.742603		2015.29	2015-04-16	2015-04-16T21:36:10	1429220170786	0.514488	0.325089	2.11792	0.0872044		2014.84	2014-11-01	2014-11-01T17:42:11	1414863731769	0.675933	0.627972	1.34777	0.268382		2014.79	2014-10-16	2014-10-16T10:20:13	1413454813788	0.745749	0.673836	1.56081	0.287614		2015.27	2015-04-06	2015-04-06T05:44:24	1428299064521	1.16062	0.770093	4.25929	0.159851		2015.75	2015-09-30	2015-09-30T17:37:31	1443634651907	1.15324
2013.8	2013-10-17	2013-10-17T02:58:50	1381978730789	1.67336	1.5979	3.04868	0.742603		2015.24	2015-03-29	2015-03-29T15:00:53	1427641253767	0.429378	0.321741	1.64026	0.0872044		2014.78	2014-10-12	2014-10-12T11:38:24	1413113904765	0.675933	0.627972	1.34777	0.268382		2014.74	2014-09-25	2014-09-25T23:36:53	1411688213948	0.745749	0.673836	1.56081	0.287614		2015.21	2015-03-18	2015-03-18T20:06:21	1426709181954	0.997966	0.659257	3.61644	0.155771		2015.71	2015-09-14	2015-09-14T10:42:15	1442227335851	1.15324
2013.73	2013-09-22	2013-09-22T15:10:07	1379862607616	1.67336	1.5979	3.04868	0.742603		2015.19	2015-03-11	2015-03-11T08:25:36	1426062336747	0.39404	0.32037	1.017	0.0872044		2014.73	2014-09-22	2014-09-22T05:34:37	1411364077761	0.675933	0.627972	1.34777	0.268382		2014.68	2014-09-05	2014-09-05T12:53:34	1409921614109	0.745749	0.673836	1.56081	0.287614		2015.16	2015-02-28	2015-02-28T10:28:19	1425119299387	0.884428	0.59726	3.18097	0.155771		2015.66	2015-08-29	2015-08-29T03:46:59	1440820019795	1.15324
2013.66	2013-08-29	2013-08-29T03:21:24	1377746484442	1.67336	1.5979	3.04868	0.742603		2015.14	2015-02-21	2015-02-21T01:50:19	1424483419728	0.374825	0.32037	0.97096	0.0872044		2014.67	2014-09-01	2014-09-01T23:30:50	1409614250757	0.675933	0.627972	1.34777	0.268382		2014.63	2014-08-16	2014-08-16T02:10:14	1408155014269	0.745749	0.673836	1.56081	0.287614		2015.11	2015-02-10	2015-02-10T00:50:16	1423529416820	0.835683	0.54786	2.90214	0.155771		2015.62	2015-08-12	2015-08-12T20:51:43	1439412703739	1.16399
2013.6	2013-08-04	2013-08-04T15:32:41	1375630361269	1.67336	1.5979	3.04868	0.742603		2015.09	2015-02-02	2015-02-02T19:15:02	1422904502709	0.370273	0.32037	0.948555	0.0872044		2014.62	2014-08-12	2014-08-12T17:27:03	1407864423754	0.675933	0.627972	1.34777	0.268382		2014.57	2014-07-26	2014-07-26T15:26:54	1406388414430	0.745749	0.673836	1.56081	0.287614		2015.06	2015-01-22	2015-01-22T15:12:14	1421939534254	0.781186	0.524392	2.74818	0.155771		2015.57	2015-07-27	2015-07-27T13:56:27	1438005387683	3.64102
2013.53	2013-07-11	2013-07-11T03:43:58	1373514238101	1.67336	1.5979	3.04868	0.742603		2015.04	2015-01-15	2015-01-15T12:39:45	1421325585689	0.369795	0.32037	0.947611	0.0872044		2014.56	2014-07-23	2014-07-23T11:23:16	1406114596750	0.675933	0.627972	1.34777	0.268382		2014.51	2014-07-06	2014-07-06T04:43:34	1404621814591	0.745749	0.673836	1.56081	0.287614		2015.01	2015-01-04	2015-01-04T05:34:11	1420349651687	0.720417	0.517377	2.58155	0.155771		2015.53	2015-07-11	2015-07-11T07:01:11	1436598071627	3.69457
2013.46	2013-06-16	2013-06-16T15:55:14	1371398114928	1.67336	1.5979	3.04868	0.742603		2014.99	2014-12-28	2014-12-28T06:04:28	1419746668669	0.367825	0.32037	0.947611	0.0872044		2014.51	2014-07-03	2014-07-03T05:19:29	1404364769746	0.675933	0.627972	1.34777	0.268382		2014.46	2014-06-15	2014-06-15T18:00:14	1402855214751	0.745749	0.673836	1.56081	0.287614		2014.96	2014-12-16	2014-12-16T19:56:09	1418759769120	0.694186	0.513507	2.39265	0.155771		2015.48	2015-06-25	2015-06-25T00:05:55	1435190755571	3.11352
2013.39	2013-05-23	2013-05-23T04:06:31	1369281991754	1.67336	1.5979	3.04868	0.742603		2014.94	2014-12-09	2014-12-09T23:29:11	1418167751650	0.366674	0.32037	0.947611	0.0872044		2014.45	2014-06-12	2014-06-12T23:15:42	1402614942742	0.675933	0.627972	1.34777	0.268382		2014.4	2014-05-26	2014-05-26T07:16:54	1401088614915	0.745749	0.673836	1.56081	0.287614		2014.91	2014-11-28	2014-11-28T10:18:06	1417169886553	0.671539	0.512899	2.33265	0.155771		2015.44	2015-06-08	2015-06-08T17:10:39	1433783439515	2.18164
2013.33	2013-04-28	2013-04-28T16:17:48	1367165868581	1.67488	1.60016	3.04868	0.742603		2014.89	2014-11-21	2014-11-21T16:53:54	1416588834630	0.366674	0.32037	0.947611	0.0872044		2014.4	2014-05-23	2014-05-23T17:11:55	1400865115738	0.675933	0.627972	1.34777	0.268382		2014.35	2014-05-05	2014-05-05T20:33:35	1399322015075	0.745749	0.673836	1.56081	0.287614		2014.86	2014-11-10	2014-11-10T00:40:03	1415580003986	0.654414	0.512748	2.18646	0.155771		2015.39	2015-05-23	2015-05-23T10:15:23	1432376123459	1.64547
2013.26	2013-04-04	2013-04-04T04:29:05	1365049745407	1.67578	1.60016	3.04868	0.746924		2014.84	2014-11-03	2014-11-03T10:18:37	1415009917610	0.366674	0.32037	0.947611	0.0872044		2014.34	2014-05-03	2014-05-03T11:08:08	1399115288735	0.675933	0.627972	1.34777	0.268382		2014.29	2014-04-15	2014-04-15T09:50:15	1397555415236	0.745749	0.673836	1.56081	0.287614		2014.81	2014-10-22	2014-10-22T15:02:01	1413990121420	0.632604	0.512748	1.9853	0.155771		2015.35	2015-05-07	2015-05-07T03:20:07	1430968807403	1.28872
2013.19	2013-03-10	2013-03-10T16:40:22	1362933622234	1.6767	1.60016	3.04868	0.746924		2014.79	2014-10-16	2014-10-16T03:43:20	1413431000591	0.366674	0.32037	0.947611	0.0872044		2014.28	2014-04-13	2014-04-13T05:04:21	1397365461731	0.675933	0.627972	1.34777	0.268382		2014.23	2014-03-25	2014-03-25T23:06:55	1395788815397	0.745749	0.673836	1.56081	0.287614		2014.76	2014-10-04	2014-10-04T05:23:58	1412400238853	0.630301	0.512748	1.91919	0.155771		2015.31	2015-04-20	2015-04-20T20:24:51	1429561491347	1.03338
2013.13	2013-02-14	2013-02-14T04:51:39	1360817499060	1.67751	1.60363	3.04868	0.746924		2014.74	2014-09-27	2014-09-27T21:08:03	1411852083571	0.366674	0.32037	0.947611	0.0872044		2014.23	2014-03-23	2014-03-23T23:00:34	1395615634727	0.676252	0.627972	1.34777	0.268382		2014.18	2014-03-05	2014-03-05T12:23:35	1394022215557	0.745749	0.673836	1.56081	0.287614		2014.71	2014-09-15	2014-09-15T19:45:56	1410810356286	0.626951	0.512748	1.88439	0.155771		2015.26	2015-04-04	2015-04-04T13:29:35	1428154175291	0.875861
2013.06	2013-01-20	2013-01-20T17:02:55	1358701375887	1.68121	1.61154	3.04868	0.74999		2014.69	2014-09-09	2014-09-09T14:32:46	1410273166551	0.366674	0.32037	0.947611	0.0872044		2014.17	2014-03-03	2014-03-03T16:56:47	1393865807723	0.677034	0.628306	1.34777	0.268382		2014.12	2014-02-13	2014-02-13T01:40:15	1392255615718	0.746252	0.673836	1.56081	0.287614		2014.66	2014-08-28	2014-08-28T10:07:53	1409220473719	0.620559	0.512748	1.82066	0.155771		2015.22	2015-03-19	2015-03-19T06:34:19	1426746859235	0.812245
2012.99	2012-12-26	2012-12-26T05:14:12	1356498852713	1.68109	1.61154	3.04578	0.764352		2014.64	2014-08-22	2014-08-22T07:57:29	1408694249532	0.366674	0.32037	0.947611	0.0872044		2014.12	2014-02-11	2014-02-11T10:53:00	1392115980719	0.678178	0.628838	1.34777	0.269266		2014.07	2014-01-23	2014-01-23T14:56:55	1390489015878	0.746252	0.673836	1.56081	0.287614		2014.61	2014-08-10	2014-08-10T00:29:51	1407630591152	0.615777	0.512748	1.74982	0.155771		2015.17	2015-03-02	2015-03-02T23:39:03	1425339543179	0.788102
2012.92	2012-12-01	2012-12-01T17:25:29	1354382729540	1.68381	1.61269	3.04578	0.775569		2014.59	2014-08-04	2014-08-04T01:22:12	1407115332512	0.366674	0.32037	0.947611	0.0872044		2014.06	2014-01-22	2014-01-22T04:49:13	1390366153716	0.678947	0.628838	1.34777	0.271661		2014.01	2014-01-03	2014-01-03T04:13:36	1388722416039	0.746252	0.673836	1.56081	0.287614		2014.56	2014-07-22	2014-07-22T14:51:48	1406040708586	0.614355	0.512748	1.74982	0.155771		2015.13	2015-02-14	2015-02-14T16:43:47	1423932227123	0.776576
[truncated: 19 more columns]

## Sheet: H1N1
	Bayesian Skyline: H1N1_HA_dates.log									Bayesian Skyline:H1N1_MP_ Combined									Bayesian Skyline: H1N1_NA_dates.log									Bayesian Skyline: H1N1_NP_dates.log									Bayesian Skyline: H1N1_NS_Combined									Bayesian Skyline: H1N1_PA_dates.log
time	date	datetime	milliseconds	mean	median	upper	lower		time	date	datetime	milliseconds	mean	median	upper	lower		time	date	datetime	milliseconds	mean	median	upper	lower		time	date	datetime	milliseconds	mean	median	upper	lower		time	date	datetime	milliseconds	mean	median	upper	lower		time	date	datetime	milliseconds	mean
2022.75	2022-09-30	2022-09-30T05:00:00	1664514000914	0.654633	0.633232	1.05732	0.385034		2022.75	2022-09-30	2022-09-30T05:00:00	1664514000652	1.20063	1.1646	2.03477	0.62506		2022.75	2022-09-30	2022-09-30T05:00:00	1664514000607	1.32636	1.27996	2.19388	0.83758		2022.75	2022-09-30	2022-09-30T05:00:00	1664514000278	0.587013	0.560157	1.01717	0.316626		2022.75	2022-09-30	2022-09-30T05:00:00	1664514000027	0.790678	0.753302	1.35098	0.427822		2022.75	2022-09-30	2022-09-30T05:00:00	1664514000925	0.926473
2022.65	2022-08-26	2022-08-26T08:21:35	1661502095554	0.654633	0.633232	1.05732	0.385034		2022.66	2022-08-26	2022-08-26T16:30:15	1661531415042	1.20063	1.1646	2.03477	0.62506		2022.65	2022-08-25	2022-08-25T23:37:28	1661470648400	1.32636	1.27996	2.19388	0.83758		2022.66	2022-08-26	2022-08-26T14:22:39	1661523759147	0.587013	0.560157	1.01717	0.316626		2022.66	2022-08-27	2022-08-27T14:48:40	1661611720436	0.790678	0.753302	1.35098	0.427822		2022.66	2022-08-27	2022-08-27T10:27:15	1661596035566	0.926473
2022.56	2022-07-22	2022-07-22T11:43:10	1658490190194	0.654633	0.633232	1.05732	0.385034		2022.56	2022-07-23	2022-07-23T04:00:29	1658548829425	1.20063	1.1646	2.03477	0.62506		2022.56	2022-07-21	2022-07-21T18:14:56	1658427296194	1.32636	1.27996	2.19388	0.83758		2022.56	2022-07-22	2022-07-22T23:45:18	1658533518017	0.587013	0.560157	1.01717	0.316626		2022.57	2022-07-25	2022-07-25T00:37:20	1658709440846	0.790678	0.753302	1.35098	0.427822		2022.56	2022-07-24	2022-07-24T15:54:30	1658678070207	0.926473
2022.46	2022-06-17	2022-06-17T15:04:44	1655478284834	0.654633	0.633232	1.05732	0.385034		2022.47	2022-06-18	2022-06-18T15:30:43	1655566243808	1.20063	1.1646	2.03477	0.62506		2022.46	2022-06-16	2022-06-16T12:52:23	1655383943988	1.32636	1.27996	2.19388	0.83758		2022.47	2022-06-18	2022-06-18T09:07:56	1655543276887	0.587013	0.560157	1.01717	0.316626		2022.47	2022-06-21	2022-06-21T10:26:01	1655807161256	0.790678	0.753302	1.35098	0.427822		2022.47	2022-06-20	2022-06-20T21:21:44	1655760104848	0.926473
2022.37	2022-05-13	2022-05-13T18:26:19	1652466379475	0.654633	0.633232	1.05732	0.385034		2022.37	2022-05-15	2022-05-15T03:00:58	1652583658192	1.20063	1.1646	2.03477	0.62506		2022.36	2022-05-12	2022-05-12T07:29:51	1652340591782	1.32636	1.27996	2.19388	0.83758		2022.37	2022-05-14	2022-05-14T18:30:35	1652553035757	0.587013	0.560157	1.01717	0.316626		2022.38	2022-05-18	2022-05-18T20:14:41	1652904881666	0.790678	0.753302	1.35098	0.427822		2022.38	2022-05-18	2022-05-18T02:48:59	1652842139490	0.926473
2022.27	2022-04-08	2022-04-08T21:47:54	1649454474115	0.654633	0.633232	1.05732	0.385034		2022.28	2022-04-10	2022-04-10T14:31:12	1649601072575	1.20063	1.1646	2.03477	0.62506		2022.27	2022-04-07	2022-04-07T02:07:19	1649297239576	1.32636	1.27996	2.19388	0.83758		2022.28	2022-04-10	2022-04-10T03:53:14	1649562794627	0.587013	0.560157	1.01717	0.316626		2022.29	2022-04-15	2022-04-15T06:03:22	1650002602075	0.790678	0.753302	1.35098	0.427822		2022.29	2022-04-14	2022-04-14T08:16:14	1649924174131	0.926473
2022.18	2022-03-05	2022-03-05T01:09:28	1646442568755	0.654633	0.633232	1.05732	0.385034		2022.18	2022-03-07	2022-03-07T02:01:26	1646618486958	1.20063	1.1646	2.03477	0.62506		2022.17	2022-03-02	2022-03-02T20:44:47	1646253887370	1.32636	1.27996	2.19388	0.83758		2022.18	2022-03-06	2022-03-06T13:15:53	1646572553497	0.587013	0.560157	1.01717	0.316626		2022.2	2022-03-12	2022-03-12T15:52:02	1647100322485	0.790678	0.753302	1.35098	0.427822		2022.19	2022-03-11	2022-03-11T13:43:28	1647006208772	0.926473
2022.08	2022-01-29	2022-01-29T04:31:03	1643430663395	0.654633	0.633232	1.05732	0.385034		2022.09	2022-01-31	2022-01-31T13:31:41	1643635901342	1.20063	1.1646	2.03477	0.62506		2022.07	2022-01-26	2022-01-26T15:22:15	1643210535164	1.32636	1.27996	2.19388	0.83758		2022.09	2022-01-30	2022-01-30T22:38:32	1643582312367	0.587013	0.560157	1.01717	0.316626		2022.11	2022-02-07	2022-02-07T01:40:42	1644198042895	0.790678	0.753302	1.35098	0.427822		2022.1	2022-02-05	2022-02-05T19:10:43	1644088243413	0.926473
2021.99	2021-12-25	2021-12-25T07:52:38	1640418758036	0.654633	0.633232	1.05732	0.385034		2021.99	2021-12-28	2021-12-28T01:01:55	1640653315725	1.20063	1.1646	2.03477	0.62506		2021.98	2021-12-22	2021-12-22T09:59:42	1640167182958	1.32636	1.27996	2.19388	0.83758		2021.99	2021-12-27	2021-12-27T08:01:11	1640592071237	0.587013	0.560157	1.01717	0.316626		2022.01	2022-01-04	2022-01-04T11:29:23	1641295763305	0.790678	0.753302	1.35098	0.427822		2022.01	2022-01-03	2022-01-03T00:37:58	1641170278055	0.926473
2021.89	2021-11-20	2021-11-20T11:14:12	1637406852676	0.654633	0.633232	1.05732	0.385034		2021.9	2021-11-23	2021-11-23T12:32:10	1637670730108	1.20063	1.1646	2.03477	0.62506		2021.88	2021-11-17	2021-11-17T04:37:10	1637123830752	1.32636	1.27996	2.19388	0.83758		2021.9	2021-11-22	2021-11-22T17:23:50	1637601830107	0.587013	0.560157	1.01717	0.316626		2021.92	2021-12-01	2021-12-01T21:18:03	1638393483715	0.790678	0.753302	1.35098	0.427822		2021.92	2021-11-30	2021-11-30T06:05:12	1638252312696	0.926473
2021.79	2021-10-16	2021-10-16T14:35:47	1634394947316	0.654633	0.633232	1.05732	0.385034		2021.8	2021-10-20	2021-10-20T00:02:24	1634688144491	1.20063	1.1646	2.03477	0.62506		2021.78	2021-10-12	2021-10-12T23:14:38	1634080478546	1.32636	1.27996	2.19388	0.83758		2021.8	2021-10-19	2021-10-19T02:46:28	1634611588977	0.587013	0.560157	1.01717	0.316626		2021.83	2021-10-29	2021-10-29T07:06:44	1635491204124	0.790678	0.753302	1.35098	0.427822		2021.82	2021-10-27	2021-10-27T11:32:27	1635334347347	0.926473
2021.7	2021-09-11	2021-09-11T17:57:21	1631383041956	0.654633	0.633232	1.05732	0.385034		2021.71	2021-09-15	2021-09-15T11:32:38	1631705558875	1.20063	1.1646	2.03477	0.62506		2021.69	2021-09-07	2021-09-07T17:52:06	1631037126340	1.32636	1.27996	2.19388	0.83758		2021.71	2021-09-14	2021-09-14T12:09:07	1631621347847	0.587013	0.560157	1.01717	0.316626		2021.74	2021-09-25	2021-09-25T16:55:24	1632588924534	0.790678	0.753302	1.35098	0.427822		2021.73	2021-09-23	2021-09-23T16:59:41	1632416381989	0.926473
2021.6	2021-08-07	2021-08-07T21:18:56	1628371136597	0.654633	0.633232	1.05732	0.385034		2021.62	2021-08-11	2021-08-11T23:02:53	1628722973258	1.20063	1.1646	2.03477	0.62506		2021.59	2021-08-03	2021-08-03T12:29:34	1627993774134	1.32636	1.27996	2.19388	0.83758		2021.61	2021-08-10	2021-08-10T21:31:46	1628631106717	0.587013	0.560157	1.01717	0.316626		2021.65	2021-08-23	2021-08-23T02:44:04	1629686644944	0.790678	0.753302	1.35098	0.427822		2021.64	2021-08-20	2021-08-20T22:26:56	1629498416630	0.926473
2021.51	2021-07-04	2021-07-04T00:40:31	1625359231237	0.654633	0.633232	1.05732	0.385034		2021.52	2021-07-08	2021-07-08T10:33:07	1625740387641	1.20063	1.1646	2.03477	0.62506		2021.5	2021-06-29	2021-06-29T07:07:01	1624950421928	1.32636	1.27996	2.19388	0.83758		2021.52	2021-07-07	2021-07-07T06:54:25	1625640865587	0.587013	0.560157	1.01717	0.316626		2021.55	2021-07-20	2021-07-20T12:32:45	1626784365354	0.790678	0.753302	1.35098	0.427822		2021.55	2021-07-18	2021-07-18T03:54:11	1626580451271	0.926473
2021.41	2021-05-30	2021-05-30T04:02:05	1622347325877	0.654633	0.633232	1.05732	0.385034		2021.43	2021-06-03	2021-06-03T22:03:22	1622757802025	1.20063	1.1646	2.03477	0.62506		2021.4	2021-05-25	2021-05-25T01:44:29	1621907069722	1.32636	1.27996	2.19388	0.83758		2021.42	2021-06-02	2021-06-02T16:17:04	1622650624457	0.587013	0.560157	1.01717	0.316626		2021.46	2021-06-16	2021-06-16T22:21:25	1623882085763	0.790678	0.753302	1.35098	0.427822		2021.45	2021-06-14	2021-06-14T09:21:25	1623662485912	0.926473
2021.32	2021-04-25	2021-04-25T07:23:40	1619335420518	0.654633	0.633232	1.05732	0.385034		2021.33	2021-04-30	2021-04-30T09:33:36	1619775216408	1.20063	1.1646	2.03477	0.62506		2021.3	2021-04-19	2021-04-19T20:21:57	1618863717516	1.32636	1.27996	2.19388	0.83758		2021.33	2021-04-29	2021-04-29T01:39:43	1619660383327	0.587013	0.560157	1.01717	0.316626		2021.37	2021-05-14	2021-05-14T08:10:06	1620979806173	0.790678	0.753302	1.35098	0.427822		2021.36	2021-05-11	2021-05-11T14:48:40	1620744520554	0.926473
2021.22	2021-03-21	2021-03-21T10:45:15	1616323515158	0.654633	0.633232	1.05732	0.385034		2021.24	2021-03-26	2021-03-26T21:03:50	1616792630791	1.20063	1.1646	2.03477	0.62506		2021.21	2021-03-15	2021-03-15T14:59:25	1615820365310	1.32636	1.27996	2.19388	0.83758		2021.23	2021-03-25	2021-03-25T11:02:22	1616670142197	0.587013	0.560157	1.01717	0.316626		2021.28	2021-04-10	2021-04-10T17:58:46	1618077526583	0.790678	0.753302	1.35098	0.427822		2021.27	2021-04-07	2021-04-07T20:15:55	1617826555195	0.926473
2021.13	2021-02-14	2021-02-14T14:06:49	1613311609798	0.654633	0.633232	1.05732	0.385034		2021.14	2021-02-20	2021-02-20T08:34:05	1613810045174	1.20063	1.1646	2.03477	0.62506		2021.11	2021-02-08	2021-02-08T09:36:53	1612777013103	1.32636	1.27996	2.19388	0.83758		2021.14	2021-02-18	2021-02-18T20:25:01	1613679901067	0.587013	0.560157	1.01717	0.316626		2021.19	2021-03-08	2021-03-08T03:47:26	1615175246993	0.790678	0.753302	1.35098	0.427822		2021.18	2021-03-05	2021-03-05T01:43:09	1614908589837	0.926473
2021.03	2021-01-10	2021-01-10T17:28:24	1610299704438	0.654633	0.633232	1.05732	0.385034		2021.05	2021-01-16	2021-01-16T20:04:19	1610827459558	1.20063	1.1646	2.03477	0.62506		2021.01	2021-01-04	2021-01-04T04:14:20	1609733660897	1.32636	1.27996	2.19388	0.83758		2021.04	2021-01-15	2021-01-15T05:47:39	1610689659937	0.587013	0.560157	1.01717	0.316626		2021.09	2021-02-02	2021-02-02T13:36:07	1612272967403	0.790678	0.753302	1.35098	0.427822		2021.08	2021-01-30	2021-01-30T07:10:24	1611990624479	0.926473
2020.94	2020-12-05	2020-12-05T20:49:59	1607201399079	0.654633	0.633232	1.05732	0.385034		2020.95	2020-12-12	2020-12-12T07:34:33	1607758473941	1.20063	1.1646	2.03477	0.62506		2020.92	2020-11-28	2020-11-28T22:51:48	1606603908691	1.32636	1.27996	2.19388	0.83758		2020.95	2020-12-10	2020-12-10T15:10:18	1607613018807	0.587013	0.560157	1.01717	0.316626		2021	2020-12-30	2020-12-30T23:24:47	1609370687812	0.790678	0.753302	1.35098	0.427822		2020.99	2020-12-26	2020-12-26T12:37:39	1608986259120	0.926473
2020.84	2020-11-01	2020-11-01T00:11:33	1604189493719	0.654633	0.633232	1.05732	0.385034		2020.86	2020-11-07	2020-11-07T19:04:48	1604775888324	1.20063	1.1646	2.03477	0.62506		2020.82	2020-10-24	2020-10-24T17:29:16	1603560556485	1.32636	1.27996	2.19388	0.83758		2020.85	2020-11-06	2020-11-06T00:32:57	1604622777677	0.587013	0.560157	1.01717	0.316626		2020.91	2020-11-26	2020-11-26T09:13:28	1606382008223	0.790678	0.753302	1.35098	0.427822		2020.9	2020-11-22	2020-11-22T18:04:53	1606068293761	0.926473
2020.74	2020-09-27	2020-09-27T03:33:08	1601177588359	0.654633	0.633232	1.05732	0.385034		2020.76	2020-10-04	2020-10-04T06:35:02	1601793302708	1.20063	1.1646	2.03477	0.62506		2020.72	2020-09-19	2020-09-19T12:06:44	1600517204279	1.32636	1.27996	2.19388	0.83758		2020.76	2020-10-02	2020-10-02T09:55:36	1601632536547	0.587013	0.560157	1.01717	0.316626		2020.82	2020-10-23	2020-10-23T19:02:08	1603479728633	0.790678	0.753302	1.35098	0.427822		2020.81	2020-10-19	2020-10-19T23:32:08	1603150328402	0.926473
2020.65	2020-08-23	2020-08-23T06:54:42	1598165682999	0.654633	0.633232	1.05732	0.385034		2020.67	2020-08-30	2020-08-30T18:05:17	1598810717091	1.20063	1.1646	2.03477	0.62506		2020.63	2020-08-15	2020-08-15T06:44:12	1597473852083	1.32636	1.27996	2.19388	0.83758		2020.66	2020-08-28	2020-08-28T19:18:15	1598642295417	0.587013	0.560157	1.01717	0.316626		2020.73	2020-09-20	2020-09-20T04:50:49	1600577449043	0.790678	0.753302	1.35098	0.427822		2020.71	2020-09-16	2020-09-16T04:59:23	1600232363044	0.926473
2020.55	2020-07-19	2020-07-19T10:16:17	1595153777640	0.654633	0.633232	1.05732	0.385034		2020.57	2020-07-27	2020-07-27T05:35:31	1595828131474	1.20063	1.1646	2.03477	0.62506		2020.53	2020-07-11	2020-07-11T01:21:39	1594430499877	1.32636	1.27996	2.19388	0.83758		2020.57	2020-07-25	2020-07-25T04:40:54	1595652054287	0.587013	0.560157	1.01717	0.316626		2020.63	2020-08-17	2020-08-17T14:39:29	1597675169452	0.790678	0.753302	1.35098	0.427822		2020.62	2020-08-13	2020-08-13T10:26:37	1597314397685	0.926473
2020.46	2020-06-14	2020-06-14T13:37:52	1592141872280	0.654633	0.633232	1.05732	0.385034		2020.48	2020-06-22	2020-06-22T17:05:45	1592845545857	1.20063	1.1646	2.03477	0.62506		2020.43	2020-06-05	2020-06-05T19:59:07	1591387147671	1.32636	1.27996	2.19388	0.83758		2020.47	2020-06-20	2020-06-20T14:03:33	1592661813157	0.587013	0.560157	1.01717	0.316626		2020.54	2020-07-15	2020-07-15T00:28:09	1594772889862	0.790678	0.753302	1.35098	0.427822		2020.53	2020-07-10	2020-07-10T15:53:52	1594396432326	0.926473
2020.36	2020-05-10	2020-05-10T16:59:26	1589129966920	0.654633	0.633232	1.05732	0.385034		2020.39	2020-05-19	2020-05-19T04:36:00	1589862960241	1.20063	1.1646	2.03477	0.62506		2020.34	2020-05-01	2020-05-01T14:36:35	1588343795465	1.32636	1.27996	2.19388	0.83758		2020.38	2020-05-16	2020-05-16T23:26:12	1589671572027	0.587013	0.560157	1.01717	0.316626		2020.45	2020-06-11	2020-06-11T10:16:50	1591870610272	0.790678	0.753302	1.35098	0.427822		2020.44	2020-06-06	2020-06-06T21:21:06	1591478466968	0.926473
2020.27	2020-04-05	2020-04-05T20:21:01	1586118061561	0.654633	0.633232	1.05732	0.385034		2020.29	2020-04-14	2020-04-14T16:06:14	1586880374624	1.20063	1.1646	2.03477	0.62506		2020.24	2020-03-27	2020-03-27T09:14:03	1585300443259	1.32636	1.27996	2.19388	0.83758		2020.28	2020-04-12	2020-04-12T08:48:50	1586681330897	0.587013	0.560157	1.01717	0.316626		2020.36	2020-05-08	2020-05-08T20:05:30	1588968330682	0.790678	0.753302	1.35098	0.427822		2020.34	2020-05-04	2020-05-04T02:48:21	1588560501609	0.926473
2020.17	2020-03-01	2020-03-01T23:42:36	1583106156201	0.654633	0.633232	1.05732	0.385034		2020.2	2020-03-11	2020-03-11T03:36:29	1583897789007	1.20063	1.1646	2.03477	0.62506		2020.14	2020-02-21	2020-02-21T03:51:31	1582257091053	1.32636	1.27996	2.19388	0.83758		2020.19	2020-03-08	2020-03-08T18:11:29	1583691089766	0.587013	0.560157	1.01717	0.316626		2020.27	2020-04-05	2020-04-05T05:54:11	1586066051092	0.790678	0.753302	1.35098	0.427822		2020.25	2020-03-31	2020-03-31T08:15:36	1585642536250	0.926473
2020.08	2020-01-27	2020-01-27T03:04:10	1580094250856	0.654633	0.633232	1.05732	0.385034		2020.1	2020-02-05	2020-02-05T15:06:43	1580915203391	1.20063	1.1646	2.03477	0.62506		2020.05	2020-01-16	2020-01-16T22:28:58	1579213738847	1.32636	1.27996	2.19388	0.83758		2020.1	2020-02-03	2020-02-03T03:34:08	1580700848636	0.587013	0.560157	1.01717	0.316626		2020.17	2020-03-02	2020-03-02T15:42:51	1583163771501	0.790678	0.753302	1.35098	0.427822		2020.16	2020-02-26	2020-02-26T13:42:50	1582724570891	0.926473
2019.98	2019-12-23	2019-12-23T06:25:45	1577082345496	0.654633	0.633232	1.05732	0.385034		2020.01	2020-01-02	2020-01-02T02:36:57	1577932617775	1.20063	1.1646	2.03477	0.62506		2019.95	2019-12-12	2019-12-12T17:06:26	1576170386641	1.32636	1.27996	2.19388	0.83758		2020	2019-12-30	2019-12-30T12:56:47	1577710607506	0.587013	0.560157	1.01717	0.316626		2020.08	2020-01-29	2020-01-29T01:31:31	1580261491911	0.790678	0.753302	1.35098	0.427822		2020.07	2020-01-23	2020-01-23T19:10:05	1579806605533	0.926473
2019.88	2019-11-18	2019-11-18T09:47:20	1574070440137	0.654633	0.633232	1.05732	0.385034		2019.91	2019-11-28	2019-11-28T14:07:12	1574950032158	1.20063	1.1646	2.03477	0.62506		2019.85	2019-11-07	2019-11-07T11:43:54	1573127034435	1.32636	1.27996	2.19388	0.83758		2019.91	2019-11-25	2019-11-25T22:19:26	1574720366376	0.587013	0.560157	1.01717	0.316626		2019.99	2019-12-26	2019-12-26T11:20:12	1577359212321	0.790678	0.753302	1.35098	0.427822		2019.97	2019-12-21	2019-12-21T00:37:20	1576888640174	0.926473
2019.79	2019-10-14	2019-10-14T13:08:54	1571058534777	0.654633	0.633232	1.05732	0.385034		2019.82	2019-10-25	2019-10-25T01:37:26	1571967446541	1.20063	1.1646	2.03477	0.62506		2019.76	2019-10-03	2019-10-03T06:21:22	1570083682229	1.32636	1.27996	2.19388	0.83758		2019.81	2019-10-22	2019-10-22T07:42:05	1571730125246	0.587013	0.560157	1.01717	0.316626		2019.9	2019-11-22	2019-11-22T21:08:52	1574456932732	0.790678	0.753302	1.35098	0.427822		2019.88	2019-11-17	2019-11-17T06:04:34	1573970674815	0.926473
2019.69	2019-09-09	2019-09-09T16:30:29	1568046629417	0.654633	0.633232	1.05732	0.385034		2019.72	2019-09-20	2019-09-20T13:07:40	1568984860925	1.20063	1.1646	2.03477	0.62506		2019.66	2019-08-29	2019-08-29T00:58:50	1567040330023	1.32636	1.27996	2.19388	0.83758		2019.72	2019-09-17	2019-09-17T17:04:44	1568739884116	0.587013	0.560157	1.01717	0.316626		2019.81	2019-10-20	2019-10-20T06:57:33	1571554653141	0.790678	0.753302	1.35098	0.427822		2019.79	2019-10-14	2019-10-14T11:31:49	1571052709457	0.926473
2019.6	2019-08-05	2019-08-05T19:52:04	1565034724057	0.654633	0.633232	1.05732	0.385034		2019.63	2019-08-17	2019-08-17T00:37:55	1566002275308	1.20063	1.1646	2.03477	0.62506		2019.57	2019-07-24	2019-07-24T19:36:17	1563996977816	1.32636	1.27996	2.19388	0.83758		2019.62	2019-08-14	2019-08-14T02:27:22	1565749642986	1.01146	0.906852	2.14896	0.464835		2019.71	2019-09-16	2019-09-16T16:46:13	1568652373551	0.790678	0.753302	1.35098	0.427822		2019.7	2019-09-10	2019-09-10T16:59:04	1568134744098	0.926473
2019.5	2019-07-01	2019-07-01T23:13:38	1562022818698	1.01361	0.966259	1.78717	0.522549		2019.53	2019-07-13	2019-07-13T12:08:09	1563019689691	1.19195	1.1572	2.02868	0.59063		2019.47	2019-06-19	2019-06-19T14:13:45	1560953625611	1.03609	0.952681	2.04928	0.477828		2019.53	2019-07-10	2019-07-10T11:50:01	1562759401856	1.15476	1.05446	2.22751	0.561588		2019.62	2019-08-14	2019-08-14T02:34:53	1565750093961	0.790678	0.753302	1.35098	0.427822		2019.6	2019-08-07	2019-08-07T22:26:18	1565216778739	0.926473
2019.41	2019-05-28	2019-05-28T02:35:13	1559010913338	1.05887	1.00251	1.83305	0.535283		2019.44	2019-06-08	2019-06-08T23:38:24	1560037104075	0.838491	0.770592	1.69083	0.371725		2019.37	2019-05-15	2019-05-15T08:51:13	1557910273405	1.18532	1.1405	2.10508	0.665646		2019.43	2019-06-05	2019-06-05T21:12:40	1559769160726	1.73096	1.67007	2.99524	0.975878		2019.53	2019-07-11	2019-07-11T12:23:34	1562847814371	0.886459	0.787805	2.08874	0.434386		2019.51	2019-07-05	2019-07-05T03:53:33	1562298813380	2.06187
2019.31	2019-04-23	2019-04-23T05:56:47	1555999007978	2.0757	2.00972	3.2271	1.22969		2019.35	2019-05-05	2019-05-05T11:08:38	1557054518458	1.08422	1.01396	2.01601	0.529424		2019.28	2019-04-10	2019-04-10T03:28:41	1554866921199	1.1251	1.07555	1.87905	0.604096		2019.34	2019-05-02	2019-05-02T06:35:19	1556778919596	1.71782	1.66208	2.91744	0.975766		2019.44	2019-06-07	2019-06-07T22:12:14	1559945534781	1.73942	1.64981	3.23821	0.810802		2019.42	2019-06-01	2019-06-01T09:20:48	1559380848022	2.06187
2019.22	2019-03-19	2019-03-19T09:18:22	1552987102619	2.07386	2.00506	3.2271	1.20983		2019.25	2019-03-31	2019-03-31T22:38:52	1554071932841	1.05969	1.00082	1.94493	0.529424		2019.18	2019-03-05	2019-03-05T22:06:08	1551823568993	1.1251	1.07555	1.87905	0.604096		2019.24	2019-03-28	2019-03-28T15:57:58	1553788678466	1.71782	1.66208	2.91744	0.975766		2019.34	2019-05-05	2019-05-05T08:00:55	1557043255190	1.60997	1.51769	3.05131	0.754091		2019.33	2019-04-28	2019-04-28T14:48:02	1556462882663	2.22383
2019.12	2019-02-12	2019-02-12T12:39:57	1549975197259	2.07386	2.00506	3.2271	1.20983		2019.16	2019-02-25	2019-02-25T10:09:07	1551089347225	1.05969	1.00082	1.94493	0.529424		2019.08	2019-01-29	2019-01-29T16:43:36	1548780216787	1.1251	1.07555	1.87905	0.604096		2019.15	2019-02-22	2019-02-22T01:20:37	1550798437336	1.71782	1.66208	2.91744	0.975766		2019.25	2019-04-01	2019-04-01T17:49:35	1554140975600	1.37711	1.31354	2.41474	0.687342		2019.23	2019-03-25	2019-03-25T20:15:17	1553544917304	3.24612
2019.03	2019-01-08	2019-01-08T16:01:31	1546963291899	2.07386	2.00506	3.2271	1.20983		2019.06	2019-01-21	2019-01-21T21:39:21	1548106761608	1.05969	1.00082	1.94493	0.529424		2018.99	2018-12-25	2018-12-25T11:21:04	1545736864581	1.1251	1.07555	1.87905	0.604096		2019.05	2019-01-18	2019-01-18T10:43:16	1547808196206	1.71782	1.66208	2.91744	0.975766		2019.16	2019-02-27	2019-02-27T03:38:16	1551238696010	1.37408	1.31213	2.39406	0.687342		2019.14	2019-02-20	2019-02-20T01:42:31	1550626951946	3.92936
2018.93	2018-12-04	2018-12-04T19:23:06	1543951386539	2.07386	2.00506	3.2271	1.20983		2018.97	2018-12-18	2018-12-18T09:09:35	1545124175991	1.05969	1.00082	1.94493	0.529424		2018.89	2018-11-20	2018-11-20T05:58:32	1542693512375	1.1251	1.07555	1.87905	0.604096		2018.96	2018-12-14	2018-12-14T20:05:55	1544817955076	1.71782	1.66208	2.91744	0.975766		2019.07	2019-01-24	2019-01-24T13:26:56	1548336416420	1.37408	1.31213	2.39406	0.687342		2019.05	2019-01-17	2019-01-17T07:09:46	1547708986587	4.03181
2018.83	2018-10-30	2018-10-30T22:44:41	1540939481180	2.07386	2.00506	3.2271	1.20983		2018.87	2018-11-13	2018-11-13T20:39:50	1542141590374	1.05969	1.00082	1.94493	0.529424		2018.79	2018-10-16	2018-10-16T00:36:00	1539650160169	1.1251	1.07555	1.87905	0.604096		2018.86	2018-11-10	2018-11-10T05:28:33	1541827713946	1.71782	1.66208	2.91744	0.975766		2018.98	2018-12-21	2018-12-21T23:15:36	1545434136829	1.37408	1.31213	2.39406	0.687342		2018.96	2018-12-14	2018-12-14T12:37:01	1544791021228	4.03137
2018.74	2018-09-26	2018-09-26T02:06:15	1537927575820	2.07386	2.00506	3.2271	1.20983		2018.78	2018-10-10	2018-10-10T08:10:04	1539159004758	1.05969	1.00082	1.94493	0.529424		2018.7	2018-09-10	2018-09-10T19:13:27	1536606807963	1.22962	1.10424	2.75764	0.647906		2018.77	2018-10-06	2018-10-06T14:51:12	1538837472816	5.04664	4.76932	9.10024	2.26209		2018.88	2018-11-18	2018-11-18T09:04:17	1542531857239	1.37408	1.31213	2.39406	0.687342		2018.86	2018-11-10	2018-11-10T18:04:15	1541873055869	4.03137
2018.64	2018-08-22	2018-08-22T05:27:50	1534915670460	10.04	9.60068	16.9895	5.41312		2018.68	2018-09-05	2018-09-05T19:40:19	1536176419141	2.49412	1.99962	6.2334	0.876523		2018.6	2018-08-06	2018-08-06T13:50:55	1533563455757	4.3365	3.99307	8.82331	1.84265		2018.67	2018-09-02	2018-09-02T00:13:51	1535847231686	2.25736	2.00553	4.91139	0.92957		2018.79	2018-10-15	2018-10-15T18:52:57	1539629577649	1.37408	1.31213	2.39406	0.687342		2018.77	2018-10-07	2018-10-07T23:31:30	1538955090511	4.06537
2018.55	2018-07-18	2018-07-18T08:49:25	1531903765100	2.76305	2.50279	6.34266	1.02614		2018.59	2018-08-02	2018-08-02T07:10:33	1533193833524	2.20777	1.99949	4.6403	0.803992		2018.5	2018-07-02	2018-07-02T08:28:23	1530520103551	2.02308	1.85224	4.23274	0.895578		2018.58	2018-07-29	2018-07-29T09:36:30	1532856990556	1.80743	1.68388	3.36746	0.851945		2018.7	2018-09-12	2018-09-12T04:41:38	1536727298059	1.44646	1.31714	2.66654	0.688738		2018.68	2018-09-04	2018-09-04T04:58:45	1536037125152	3.11765
2018.45	2018-06-13	2018-06-13T12:10:59	1528891859741	1.58631	1.50253	2.77595	0.741575		2018.49	2018-06-28	2018-06-28T18:40:47	1530211247908	1.78112	1.64651	3.42334	0.848537		2018.41	2018-05-28	2018-05-28T03:05:51	1527476751345	2.19882	2.11255	3.53696	1.28506		2018.48	2018-06-24	2018-06-24T18:59:09	1529866749426	2.40501	2.33067	3.93595	1.36074		2018.61	2018-08-09	2018-08-09T14:30:18	1533825018469	6.6829	6.15544	14.1329	2.41823		2018.59	2018-08-01	2018-08-01T10:25:59	1533119159793	1.77019
2018.36	2018-05-09	2018-05-09T15:32:34	1525879954381	2.89846	2.82722	4.48118	1.85505		2018.4	2018-05-25	2018-05-25T06:11:02	1527228662291	2.28599	2.19122	3.75283	1.34956		2018.31	2018-04-22	2018-04-22T21:43:19	1524433399140	2.30773	2.21217	3.60006	1.34347		2018.39	2018-05-21	2018-05-21T04:21:48	1526876508296	2.3863	2.30973	3.87551	1.34572		2018.52	2018-07-07	2018-07-07T00:18:58	1530922738878	3.51989	3.22571	7.4247	1.37095		2018.49	2018-06-28	2018-06-28T15:53:14	1530201194435	2.7772
2018.26	2018-04-04	2018-04-04T18:54:09	1522868049021	2.89646	2.82199	4.48118	1.85505		2018.3	2018-04-20	2018-04-20T17:41:16	1524246076674	2.44552	2.37197	4.01529	1.37729		2018.21	2018-03-18	2018-03-18T16:20:46	1521390046934	2.30773	2.21217	3.60006	1.34347		2018.29	2018-04-16	2018-04-16T13:44:27	1523886267166	2.3863	2.30973	3.87551	1.34572		2018.42	2018-06-03	2018-06-03T10:07:39	1528020459288	1.78001	1.61342	3.79788	0.746934		2018.4	2018-05-25	2018-05-25T21:20:29	1527283229076	2.7772
2018.17	2018-02-28	2018-02-28T22:15:43	1519856143662	2.89646	2.82199	4.48118	1.85505		2018.21	2018-03-17	2018-03-17T05:11:31	1521263491057	2.44395	2.37172	4.01151	1.37729		2018.12	2018-02-11	2018-02-11T10:58:14	1518346694728	2.30773	2.21217	3.60006	1.34347		2018.2	2018-03-12	2018-03-12T23:07:06	1520896026036	2.3863	2.30973	3.87551	1.34572		2018.33	2018-04-30	2018-04-30T19:56:19	1525118179698	1.20264	1.12645	2.33884	0.6194		2018.31	2018-04-22	2018-04-22T02:47:43	1524365263717	2.7772
2018.07	2018-01-25	2018-01-25T01:37:18	1516844238302	2.89646	2.82199	4.48118	1.85505		2018.12	2018-02-10	2018-02-10T16:41:45	1518280905441	2.44395	2.37172	4.01151	1.37729		2018.02	2018-01-07	2018-01-07T05:35:42	1515303342521	2.30773	2.21217	3.60006	1.34347		2018.1	2018-02-06	2018-02-06T08:29:44	1517905784906	2.3863	2.30973	3.87551	1.34572		2018.24	2018-03-28	2018-03-28T05:45:00	1522215900108	1.18712	1.11832	2.18046	0.6194		2018.22	2018-03-19	2018-03-19T08:14:58	1521447298358	2.7772
2017.97	2017-12-21	2017-12-21T04:58:52	1513832332942	2.89646	2.82199	4.48118	1.85505		2018.02	2018-01-07	2018-01-07T04:11:59	1515298319824	2.44395	2.37172	4.01151	1.37729		2017.92	2017-12-03	2017-12-03T00:13:10	1512259990315	2.30773	2.21217	3.60006	1.34347		2018.01	2018-01-02	2018-01-02T17:52:23	1514915543776	2.3863	2.30973	3.87551	1.34572		2018.15	2018-02-22	2018-02-22T15:33:40	1519313620517	1.18712	1.11832	2.18046	0.6194		2018.12	2018-02-13	2018-02-13T13:42:13	1518529333000	2.76707
2017.88	2017-11-16	2017-11-16T08:20:27	1510820427582	2.89646	2.82199	4.48118	1.85505		2017.93	2017-12-03	2017-12-03T15:42:14	1512315734207	2.44395	2.37172	4.01151	1.37729		2017.83	2017-10-28	2017-10-28T18:50:38	1509216638109	2.30773	2.21217	3.60006	1.34347		2017.91	2017-11-29	2017-11-29T03:15:02	1511925302646	2.3863	2.30973	3.87551	1.34572		2018.06	2018-01-20	2018-01-20T01:22:20	1516411340927	1.18712	1.11832	2.18046	0.6194		2018.03	2018-01-10	2018-01-10T19:09:27	1515611367645	2.59847
2017.78	2017-10-12	2017-10-12T11:42:02	1507808522223	2.89646	2.82199	4.48118	1.85505		2017.83	2017-10-30	2017-10-30T03:12:28	1509333148591	2.44395	2.37172	4.01151	1.37729		2017.73	2017-09-23	2017-09-23T13:28:05	1506173285903	2.30773	2.21217	3.60006	1.34347		2017.82	2017-10-25	2017-10-25T12:37:41	1508935061516	2.38767	2.31079	3.87551	1.34572		2017.96	2017-12-17	2017-12-17T11:11:01	1513509061338	1.18712	1.11832	2.18046	0.6194		2017.94	2017-12-08	2017-12-08T00:36:42	1512693402286	2.21445
2017.69	2017-09-07	2017-09-07T15:03:36	1504796616863	2.89646	2.82199	4.48118	1.85505		2017.74	2017-09-25	2017-09-25T14:42:42	1506350562974	2.44395	2.37172	4.01151	1.37729		2017.64	2017-08-19	2017-08-19T08:05:33	1503129933697	2.15537	2.11009	3.55718	1.01367		2017.72	2017-09-20	2017-09-20T22:00:20	1505944820386	2.38131	2.32357	3.88932	1.26831		2017.87	2017-11-13	2017-11-13T20:59:41	1510606781748	1.18712	1.11832	2.18046	0.6194		2017.85	2017-11-04	2017-11-04T06:03:56	1509775436928	1.90569
2017.59	2017-08-03	2017-08-03T18:25:11	1501784711503	2.8933	2.82199	4.48118	1.84379		2017.64	2017-08-22	2017-08-22T02:12:57	1503367977357	2.44597	2.37197	4.01151	1.37794		2017.54	2017-07-15	2017-07-15T02:43:01	1500086581491	1.59138	1.49903	2.70664	0.896672		2017.63	2017-08-17	2017-08-17T07:22:59	1502954579255	1.79039	1.67795	3.21943	0.960584		2017.78	2017-10-11	2017-10-11T06:48:22	1507704502158	1.18712	1.11832	2.18046	0.6194		2017.75	2017-10-01	2017-10-01T11:31:11	1506857471569	1.86696
2017.5	2017-06-29	2017-06-29T21:46:46	1498772806143	1.63009	1.5118	3.33684	0.969225		2017.55	2017-07-18	2017-07-18T13:43:11	1500385391741	1.92826	1.78323	3.86573	0.949072		2017.44	2017-06-09	2017-06-09T21:20:29	1497043229285	1.57575	1.49595	2.58065	0.896672		2017.53	2017-07-13	2017-07-13T16:45:38	1499964338125	1.7635	1.67076	3.01435	0.953565		2017.69	2017-09-07	2017-09-07T16:37:02	1504802222567	1.27709	1.1822	2.53843	0.634797		2017.66	2017-08-28	2017-08-28T16:58:26	1503939506210	1.86696
2017.4	2017-05-26	2017-05-26T01:08:20	1495760900784	1.54697	1.4873	2.44923	0.969074		2017.45	2017-06-14	2017-06-14T01:13:26	1497402806125	1.72746	1.6676	2.82741	0.938125		2017.35	2017-05-05	2017-05-05T15:57:57	1493999877079	1.57625	1.50098	2.58065	0.872798		2017.44	2017-06-09	2017-06-09T02:08:16	1496974096995	1.82224	1.72401	3.07482	1.06986		2017.6	2017-08-05	2017-08-05T02:25:42	1501899942977	1.89156	1.82576	3.20747	0.927666		2017.57	2017-07-25	2017-07-25T22:25:40	1501021540851	1.86696
2017.31	2017-04-21	2017-04-21T04:29:55	1492748995424	1.57102	1.5118	2.47829	0.980703		2017.36	2017-05-10	2017-05-10T12:43:40	1494420220508	1.72781	1.6676	2.82741	0.943422		2017.25	2017-03-31	2017-03-31T10:35:24	1490956524873	1.20585	1.12648	2.24629	0.697043		2017.35	2017-05-05	2017-05-05T11:30:55	1493983855865	1.84299	1.75467	3.19693	1.01003		2017.5	2017-07-02	2017-07-02T12:14:23	1498997663387	1.93213	1.85629	3.22051	1.08479		2017.48	2017-06-22	2017-06-22T03:52:55	1498103575493	1.80388
2017.21	2017-03-17	2017-03-17T07:51:30	1489737090064	1.94925	1.88606	3.06622	1.17202		2017.26	2017-04-06	2017-04-06T00:13:54	1491437634891	1.71434	1.6698	2.82741	0.845625		2017.15	2017-02-24	2017-02-24T05:12:52	1487913172667	1.16208	1.11075	1.91835	0.691605		2017.25	2017-03-31	2017-03-31T20:53:34	1490993614735	1.73886	1.65267	3.00602	0.985817		2017.41	2017-05-29	2017-05-29T22:03:03	1496095383797	1.93213	1.85629	3.22051	1.08479		2017.38	2017-05-19	2017-05-19T09:20:10	1495185610134	1.78359
2017.12	2017-02-10	2017-02-10T11:13:04	1486725184705	2.04825	2.00552	3.23769	1.21989		2017.17	2017-03-02	2017-03-02T11:44:09	1488455049275	1.43361	1.31884	2.71396	0.719397		2017.06	2017-01-19	2017-01-19T23:50:20	1484869820461	1.16208	1.11075	1.91835	0.691605		2017.16	2017-02-25	2017-02-25T06:16:13	1488003373605	1.72252	1.64692	2.84038	0.985817		2017.32	2017-04-26	2017-04-26T07:51:44	1493193104206	1.92108	1.85118	3.22051	1.0718		2017.29	2017-04-15	2017-04-15T14:47:24	1492267644775	1.78359
2017.02	2017-01-06	2017-01-06T14:34:39	1483713279345	2.04663	1.99347	3.26103	1.21989		2017.08	2017-01-26	2017-01-26T23:14:23	1485472463658	1.31861	1.2401	2.26928	0.707837		2016.96	2016-12-14	2016-12-14T18:27:48	1481740068255	1.16208	1.11075	1.91835	0.691605		2017.06	2017-01-21	2017-01-21T15:38:52	1485013132475	1.72252	1.64692	2.84038	0.985817		2017.23	2017-03-23	2017-03-23T17:40:24	1490290824616	1.78119	1.68748	3.1399	0.982479		2017.2	2017-03-12	2017-03-12T20:14:39	1489349679417	1.78359
2016.92	2016-12-01	2016-12-01T17:56:13	1480614973985	2.04758	1.99858	3.26103	1.21989		2016.98	2016-12-22	2016-12-22T10:44:38	1482403478041	1.30786	1.23595	2.22146	0.707837		2016.86	2016-11-09	2016-11-09T13:05:16	1478696716049	1.16208	1.11075	1.91835	0.691605		2016.97	2016-12-17	2016-12-17T01:01:31	1481936491345	1.72252	1.64692	2.84038	0.985817		2017.14	2017-02-18	2017-02-18T03:29:05	1487388545026	1.71943	1.63893	2.95528	0.955554		2017.11	2017-02-07	2017-02-07T01:41:54	1486431714058	1.78359
2016.83	2016-10-27	2016-10-27T21:17:48	1477603068625	2.04758	1.99858	3.26103	1.21989		2016.89	2016-11-17	2016-11-17T22:14:52	1479420892424	1.30786	1.23595	2.22146	0.707837		2016.77	2016-10-05	2016-10-05T07:42:43	1475653363843	1.16208	1.11075	1.91835	0.691605		2016.87	2016-11-12	2016-11-12T10:24:10	1478946250215	1.72252	1.64692	2.84038	0.985817		2017.04	2017-01-15	2017-01-15T13:17:45	1484486265436	1.70974	1.63582	2.871	0.955554		2017.01	2017-01-04	2017-01-04T07:09:08	1483513748699	1.78359
2016.73	2016-09-23	2016-09-23T00:39:23	1474591163266	2.04758	1.99858	3.26103	1.21989		2016.79	2016-10-14	2016-10-14T09:45:06	1476438306808	1.30786	1.23595	2.22146	0.707837		2016.67	2016-08-31	2016-08-31T02:20:11	1472610011637	1.16208	1.11075	1.91835	0.691605		2016.78	2016-10-08	2016-10-08T19:46:49	1475956009085	1.72252	1.64692	2.84038	0.985817		2016.95	2016-12-11	2016-12-11T23:06:25	1481497585846	1.70911	1.63577	2.871	0.955554		2016.92	2016-11-30	2016-11-30T12:36:23	1480509383340	1.78359
2016.64	2016-08-19	2016-08-19T04:00:57	1471579257906	2.04758	1.99858	3.26103	1.21989		2016.7	2016-09-09	2016-09-09T21:15:21	1473455721191	1.30786	1.23595	2.22146	0.707837		2016.57	2016-07-26	2016-07-26T20:57:39	1469566659431	1.16208	1.11075	1.91835	0.691605		2016.68	2016-09-04	2016-09-04T05:09:27	1472965767955	1.72252	1.64692	2.84038	0.985817		2016.86	2016-11-08	2016-11-08T08:55:06	1478595306255	1.70911	1.63577	2.871	0.955554		2016.83	2016-10-27	2016-10-27T18:03:37	1477591417982	1.78359
2016.54	2016-07-15	2016-07-15T07:22:32	1468567352546	2.04758	1.99858	3.26103	1.21989		2016.6	2016-08-06	2016-08-06T08:45:35	1470473135574	1.30786	1.23595	2.22146	0.707837		2016.48	2016-06-21	2016-06-21T15:35:07	1466523307225	1.17446	1.1249	1.91835	0.701083		2016.59	2016-07-31	2016-07-31T14:32:06	1469975526825	1.72338	1.64865	2.84038	0.980937		2016.77	2016-10-05	2016-10-05T18:43:46	1475693026665	1.70911	1.63577	2.871	0.955554		2016.74	2016-09-23	2016-09-23T23:30:52	1474673452623	1.78359
2016.45	2016-06-10	2016-06-10T10:44:07	1465555447190	2.0476	1.99858	3.26103	1.22002		2016.51	2016-07-02	2016-07-02T20:15:49	1467490549958	1.30786	1.23595	2.22146	0.707837		2016.38	2016-05-17	2016-05-17T10:12:35	1463479955018	1.10467	1.0654	1.81527	0.637027		2016.49	2016-06-26	2016-06-26T23:54:45	1466985285695	1.30833	1.22419	2.585	0.624937		2016.68	2016-09-02	2016-09-02T04:32:27	1472790747075	1.70911	1.63577	2.871	0.955554		2016.64	2016-08-21	2016-08-21T04:58:07	1471755487264	1.78496
2016.35	2016-05-06	2016-05-06T14:05:41	1462543541831	1.41531	1.27883	2.97947	0.707557		2016.41	2016-05-29	2016-05-29T07:46:04	1464507964341	1.35718	1.29323	2.39636	0.723617		2016.28	2016-04-12	2016-04-12T04:50:02	1460436602812	1.10171	1.06442	1.80241	0.637027		2016.4	2016-05-23	2016-05-23T09:17:24	1463995044565	1.26733	1.21055	2.17879	0.624937		2016.58	2016-07-30	2016-07-30T14:21:07	1469888467485	1.70911	1.63577	2.871	0.955554		2016.55	2016-07-18	2016-07-18T10:25:21	1468837521906	1.39596
2016.26	2016-04-01	2016-04-01T17:27:16	1459531636471	1.31419	1.23953	2.2895	0.702758		2016.32	2016-04-24	2016-04-24T19:16:18	1461525378724	1.31983	1.27209	2.23734	0.719379		2016.19	2016-03-07	2016-03-07T23:27:30	1457393250606	1.10171	1.06442	1.80241	0.637027		2016.3	2016-04-18	2016-04-18T18:40:03	1461004803435	1.26733	1.21055	2.17879	0.624937		2016.49	2016-06-27	2016-06-27T00:09:47	1466986187894	1.70911	1.63577	2.871	0.955554		2016.46	2016-06-14	2016-06-14T15:52:36	1465919556547	1.39437
2016.16	2016-02-26	2016-02-26T20:48:51	1456519731111	1.31419	1.23953	2.2895	0.702758		2016.22	2016-03-21	2016-03-21T06:46:33	1458542793108	1.31983	1.27209	2.23734	0.719379		2016.09	2016-02-01	2016-02-01T18:04:58	1454349898400	1.10171	1.06442	1.80241	0.637027		2016.21	2016-03-15	2016-03-15T04:02:42	1458014562305	1.26733	1.21055	2.17879	0.624937		2016.4	2016-05-24	2016-05-24T09:58:28	1464083908304	1.41309	1.34159	2.43822	0.738171		2016.37	2016-05-11	2016-05-11T21:19:51	1463001591188	1.39437
2016.06	2016-01-23	2016-01-23T00:10:25	1453507825751	1.31419	1.23953	2.2895	0.702758		2016.13	2016-02-15	2016-02-15T18:16:47	1455560207491	1.31983	1.27209	2.23734	0.719379		2015.99	2015-12-28	2015-12-28T12:42:26	1451306546194	1.10171	1.06442	1.80241	0.637027		2016.11	2016-02-09	2016-02-09T13:25:21	1455024321175	1.26733	1.21055	2.17879	0.624937		2016.31	2016-04-20	2016-04-20T19:47:08	1461181628714	1.3553	1.2845	2.31732	0.725755		2016.27	2016-04-08	2016-04-08T02:47:05	1460083625829	1.39437
2015.97	2015-12-19	2015-12-19T03:32:00	1450495920392	1.31419	1.23953	2.2895	0.702758		2016.04	2016-01-12	2016-01-12T05:47:01	1452577621874	1.31983	1.27209	2.23734	0.719379		2015.9	2015-11-23	2015-11-23T07:19:53	1448263193988	1.10171	1.06442	1.80241	0.637027		2016.02	2016-01-05	2016-01-05T22:48:00	1452034080045	1.26733	1.21055	2.17879	0.624937		2016.22	2016-03-18	2016-03-18T05:35:49	1458279349124	1.3553	1.2845	2.31732	0.725755		2016.18	2016-03-05	2016-03-05T08:14:20	1457165660471	1.59595
2015.87	2015-11-14	2015-11-14T06:53:35	1447484015032	1.31419	1.23953	2.2895	0.702758		2015.94	2015-12-08	2015-12-08T17:17:16	1449595036257	1.31983	1.27209	2.23734	0.719379		2015.8	2015-10-19	2015-10-19T01:57:21	1445219841782	1.10171	1.06442	1.80241	0.637027		2015.92	2015-12-02	2015-12-02T08:10:38	1449043838915	1.26733	1.21055	2.17879	0.624937		2016.12	2016-02-13	2016-02-13T15:24:29	1455377069534	1.3553	1.2845	2.31732	0.725755		2016.09	2016-01-31	2016-01-31T13:41:35	1454247695112	2.88526
2015.78	2015-10-10	2015-10-10T10:15:09	1444472109672	1.31419	1.23953	2.2895	0.702758		2015.85	2015-11-04	2015-11-04T04:47:30	1446612450641	1.31983	1.27209	2.23734	0.719379		2015.71	2015-09-13	2015-09-13T20:34:49	1442176489576	1.10171	1.06442	1.80241	0.637027		2015.83	2015-10-28	2015-10-28T17:33:17	1446053597785	1.26733	1.21055	2.17879	0.624937		2016.03	2016-01-11	2016-01-11T01:13:09	1452474789943	1.3553	1.2845	2.31732	0.725755		2016	2015-12-28	2015-12-28T19:08:49	1451329729753	4.61231
2015.68	2015-09-05	2015-09-05T13:36:44	1441460204313	1.31419	1.23953	2.2895	0.702758		2015.75	2015-09-30	2015-09-30T16:17:45	1443629865024	1.31983	1.27209	2.23734	0.719379		2015.61	2015-08-09	2015-08-09T15:12:17	1439133137370	1.10171	1.06442	1.80241	0.637027		2015.73	2015-09-24	2015-09-24T02:55:56	1443063356655	1.26733	1.21055	2.17879	0.624937		2015.94	2015-12-08	2015-12-08T11:01:50	1449572510353	1.3553	1.2845	2.31732	0.725755		2015.9	2015-11-25	2015-11-25T00:36:04	1448411764394	5.95167
2015.59	2015-08-01	2015-08-01T16:58:18	1438448298953	1.31419	1.23953	2.2895	0.702758		2015.66	2015-08-27	2015-08-27T03:47:59	1440647279407	1.31983	1.27209	2.23734	0.719379		2015.51	2015-07-05	2015-07-05T09:49:45	1436089785164	1.10171	1.06442	1.80241	0.637027		2015.64	2015-08-20	2015-08-20T12:18:35	1440073115525	1.26733	1.21055	2.17879	0.624937		2015.85	2015-11-04	2015-11-04T20:50:30	1446670230763	1.3553	1.2845	2.31732	0.725755		2015.81	2015-10-22	2015-10-22T06:03:19	1445493799036	6.53044
2015.49	2015-06-27	2015-06-27T20:19:53	1435436393593	1.31419	1.23953	2.2895	0.702758		2015.56	2015-07-23	2015-07-23T15:18:13	1437664693791	1.31983	1.27209	2.23734	0.719379		2015.42	2015-05-31	2015-05-31T04:27:12	1433046432958	1.10171	1.06442	1.80241	0.637027		2015.54	2015-07-16	2015-07-16T21:41:14	1437082874395	1.26733	1.21055	2.17879	0.624937		2015.76	2015-10-02	2015-10-02T06:39:11	1443767951173	1.3553	1.2845	2.31732	0.725755		2015.72	2015-09-18	2015-09-18T11:30:33	1442575833677	6.65915
2015.4	2015-05-23	2015-05-23T23:41:28	1432424488233	1.31419	1.23953	2.2895	0.702758		2015.47	2015-06-19	2015-06-19T02:48:28	1434682108174	1.31983	1.27209	2.23734	0.719379		2015.32	2015-04-25	2015-04-25T23:04:40	1430003080752	1.10171	1.06442	1.80241	0.637027		2015.45	2015-06-12	2015-06-12T07:03:53	1434092633265	1.26733	1.21055	2.17879	0.624937		2015.66	2015-08-29	2015-08-29T16:27:51	1440865671582	1.3553	1.2845	2.31732	0.725755		2015.63	2015-08-15	2015-08-15T16:57:48	1439657868318	6.67944
2015.3	2015-04-19	2015-04-19T03:03:02	1429412582874	1.31419	1.23953	2.2895	0.702758		2015.37	2015-05-15	2015-05-15T14:18:42	1431699522557	1.31983	1.27209	2.23734	0.719379		2015.22	2015-03-21	2015-03-21T17:42:08	1426959728546	1.10171	1.06442	1.80241	0.637027		2015.35	2015-05-08	2015-05-08T16:26:32	1431102392135	1.26733	1.21055	2.17879	0.624937		2015.57	2015-07-27	2015-07-27T02:16:31	1437963391992	1.3553	1.2845	2.31732	0.725755		2015.53	2015-07-12	2015-07-12T22:25:02	1436739902960	6.67944
2015.2	2015-03-15	2015-03-15T06:24:37	1426400677514	1.31419	1.23953	2.2895	0.702758		2015.28	2015-04-11	2015-04-11T01:48:56	1428716936940	1.31983	1.27209	2.23734	0.719379		2015.13	2015-02-14	2015-02-14T12:19:36	1423916376340	1.10171	1.06442	1.80241	0.637027		2015.26	2015-04-04	2015-04-04T01:49:11	1428112151005	1.26733	1.21055	2.17879	0.624937		2015.48	2015-06-23	2015-06-23T12:05:12	1435061112402	1.3553	1.2845	2.31732	0.725755		2015.44	2015-06-09	2015-06-09T03:52:17	1433821937601	6.67944
2015.11	2015-02-08	2015-02-08T09:46:12	1423388772154	1.31419	1.23953	2.2895	0.702758		2015.18	2015-03-07	2015-03-07T13:19:11	1425734351324	1.31983	1.27209	2.23734	0.719379		2015.03	2015-01-10	2015-01-10T06:57:04	1420873024134	1.10171	1.06442	1.80241	0.637027		2015.16	2015-02-28	2015-02-28T11:11:49	1425121909874	1.26733	1.21055	2.17879	0.624937		2015.39	2015-05-20	2015-05-20T21:53:52	1432158832812	1.3553	1.2845	2.31732	0.725755		2015.35	2015-05-06	2015-05-06T09:19:32	1430903972242	6.67944
2015.01	2015-01-04	2015-01-04T13:07:46	1420376866794	1.31419	1.23953	2.2895	0.702758		2015.09	2015-02-01	2015-02-01T00:49:25	1422751765707	1.31983	1.27209	2.23734	0.719379		2014.93	2014-12-06	2014-12-06T01:34:31	1417829671928	1.10171	1.06442	1.80241	0.637027		2015.07	2015-01-24	2015-01-24T20:34:28	1422131668744	1.26733	1.21055	2.17879	0.624937		2015.3	2015-04-17	2015-04-17T07:42:33	1429256553222	1.3553	1.2845	2.31732	0.725755		2015.26	2015-04-02	2015-04-02T14:46:46	1427986006883	6.67944
2014.92	2014-11-30	2014-11-30T16:29:21	1417364961435	1.31419	1.23953	2.2895	0.702758		2014.99	2014-12-28	2014-12-28T12:19:40	1419769180090	1.31983	1.27209	2.23734	0.719379		2014.84	2014-10-31	2014-10-31T20:11:59	1414786319721	1.10171	1.06442	1.80241	0.637027		2014.97	2014-12-21	2014-12-21T05:57:07	1419141427614	1.26733	1.21055	2.17879	0.624937		2015.2	2015-03-14	2015-03-14T17:31:13	1426354273631	1.3553	1.2845	2.31732	0.725755		2015.16	2015-02-27	2015-02-27T20:14:01	1425068041525	6.67944
2014.82	2014-10-26	2014-10-26T19:50:56	1414353056075	1.31419	1.23953	2.2895	0.702758		2014.9	2014-11-23	2014-11-23T23:49:54	1416786594474	1.31983	1.27209	2.23734	0.719379		2014.74	2014-09-26	2014-09-26T14:49:27	1411742967515	1.10171	1.06442	1.80241	0.637027		2014.88	2014-11-16	2014-11-16T15:19:46	1416151186484	1.26733	1.21055	2.17879	0.624937		2015.11	2015-02-09	2015-02-09T03:19:54	1423451994041	1.3553	1.2845	2.31732	0.725755		2015.07	2015-01-25	2015-01-25T01:41:16	1422150076166	6.67944
2014.73	2014-09-21	2014-09-21T23:12:30	1411341150715	1.31419	1.23953	2.2895	0.702758		2014.81	2014-10-20	2014-10-20T11:20:08	1413804008857	1.31983	1.27209	2.23734	0.719379		2014.64	2014-08-22	2014-08-22T09:26:55	1408699615309	9.1336	8.8164	16.4787	4.43653		2014.79	2014-10-13	2014-10-13T00:42:25	1413160945354	1.40606	1.23943	3.25488	0.642805		2015.02	2015-01-06	2015-01-06T13:08:34	1420549714451	1.3553	1.2845	2.31732	0.725755		2014.98	2014-12-22	2014-12-22T07:08:30	1419232110807	6.67944
2014.63	2014-08-18	2014-08-18T02:34:05	1408329245356	12.6691	12.1814	21.9854	6.51011		2014.71	2014-09-15	2014-09-15T22:50:23	1410821423240	1.31983	1.27209	2.23734	0.719379		2014.55	2014-07-18	2014-07-18T04:04:23	1405656263103	10.9815	10.1021	20.5227	5.31588		2014.69	2014-09-08	2014-09-08T10:05:04	1410170704224	10.2041	9.45051	21.7094	4.2655		2014.93	2014-12-03	2014-12-03T22:57:14	1417647434861	1.3553	1.2845	2.31732	0.725755		2014.89	2014-11-18	2014-11-18T12:35:45	1416314145449	6.67944
2014.54	2014-07-14	2014-07-14T05:55:39	1405317339996	8.51847	8.1549	16.5347	2.82828		2014.62	2014-08-12	2014-08-12T10:20:37	1407838837623	8.02518	7.40146	16.8703	3.05884		2014.45	2014-06-12	2014-06-12T22:41:50	1402612910897	5.01061	4.3837	11.2348	1.60306		2014.6	2014-08-04	2014-08-04T19:27:43	1407180463094	3.34089	2.64733	9.70636	0.84433		2014.84	2014-10-31	2014-10-31T08:45:55	1414745155270	1.3553	1.2845	2.31732	0.725755		2014.79	2014-10-15	2014-10-15T18:03:00	1413396180090	6.67944
2014.44	2014-06-09	2014-06-09T09:17:14	1402305434636	1.12314	0.947975	2.92567	0.446052		2014.52	2014-07-08	2014-07-08T21:50:52	1404856252007	3.90338	3.37944	9.72067	1.17062		2014.35	2014-05-08	2014-05-08T17:19:18	1399569558691	1.4307	1.31077	2.88365	0.60187		2014.5	2014-07-01	2014-07-01T04:50:21	1404190221964	1.01795	0.900654	2.5017	0.536298		2014.74	2014-09-27	2014-09-27T18:34:35	1411842875680	1.3553	1.2845	2.31732	0.725755		2014.7	2014-09-11	2014-09-11T23:30:14	1410478214731	12.7774
2014.35	2014-05-05	2014-05-05T12:38:49	1399293529276	0.886422	0.851927	1.37148	0.553152		2014.43	2014-06-04	2014-06-04T09:21:06	1401873666391	2.02189	1.77928	5.04267	0.755467		2014.26	2014-04-03	2014-04-03T11:56:46	1396526206485	0.931411	0.905012	1.44778	0.574265		2014.41	2014-05-27	2014-05-27T14:13:00	1401199980834	0.895158	0.870347	1.40482	0.534302		2014.65	2014-08-25	2014-08-25T04:23:16	1408940596090	6.03211	5.9346	15.2919	0.846925		2014.61	2014-08-09	2014-08-09T04:57:29	1407560249372	4.28249
2014.25	2014-03-31	2014-03-31T16:00:23	1396281623917	0.886422	0.851927	1.37148	0.553152		2014.33	2014-04-30	2014-04-30T20:51:20	1398891080774	1.34389	1.17796	3.42464	0.63022		2014.16	2014-02-27	2014-02-27T06:34:14	1393482854282	0.930042	0.905012	1.44429	0.574265		2014.31	2014-04-22	2014-04-22T23:35:39	1398209739704	0.895158	0.870347	1.40482	0.534302		2014.56	2014-07-22	2014-07-22T14:11:56	1406038316500	9.67948	8.97542	19.6626	3.49088		2014.52	2014-07-06	2014-07-06T10:24:44	1404642284014	1.50657
2014.15	2014-02-24	2014-02-24T19:21:58	1393269718557	0.886422	0.851927	1.37148	0.553152		2014.24	2014-03-27	2014-03-27T08:21:35	1395908495158	1.19556	1.147	2.03421	0.629246		2014.06	2014-01-23	2014-01-23T01:11:42	1390439502076	0.930042	0.905012	1.44429	0.574265		2014.22	2014-03-19	2014-03-19T08:58:18	1395219498574	0.895158	0.870347	1.40482	0.534302		2014.47	2014-06-19	2014-06-19T00:00:36	1403136036910	1.07409	0.682657	4.73245	0.160194		2014.42	2014-06-02	2014-06-02T15:51:58	1401724318658	0.761895
2014.06	2014-01-20	2014-01-20T22:43:33	1390257813197	0.886422	0.851927	1.37148	0.553152		2014.14	2014-02-20	2014-02-20T19:51:49	1392925909541	1.19556	1.147	2.03421	0.629246		2013.97	2013-12-18	2013-12-18T19:49:09	1387396149870	0.930042	0.905012	1.44429	0.574265		2014.12	2014-02-12	2014-02-12T18:20:57	1392229257444	0.895158	0.870347	1.40482	0.534302		2014.38	2014-05-16	2014-05-16T09:49:17	1400233757319	0.224318	0.205616	0.446117	0.0966749		2014.33	2014-04-29	2014-04-29T21:19:13	1398806353299	0.742134
2013.96	2013-12-17	2013-12-17T02:05:07	1387245907837	0.886422	0.851927	1.37148	0.553152		2014.05	2014-01-17	2014-01-17T07:22:03	1389943323924	1.19556	1.147	2.03421	0.629246		2013.87	2013-11-13	2013-11-13T14:26:37	1384352797664	0.930042	0.905012	1.44429	0.574265		2014.03	2014-01-09	2014-01-09T03:43:36	1389239016314	0.895158	0.870347	1.40482	0.534302		2014.28	2014-04-12	2014-04-12T19:37:57	1397331477729	0.222705	0.205288	0.437056	0.0966749		2014.24	2014-03-27	2014-03-27T02:46:27	1395888387941	0.742134
2013.87	2013-11-12	2013-11-12T05:26:42	1384234002478	0.886422	0.851927	1.37148	0.553152		2013.95	2013-12-13	2013-12-13T18:52:18	1386960738307	1.19556	1.147	2.03421	0.629246		2013.78	2013-10-09	2013-10-09T09:04:05	1381309445458	0.930042	0.905012	1.44429	0.574265		2013.93	2013-12-05	2013-12-05T13:06:15	1386248775184	0.895158	0.870347	1.40482	0.534302		2014.19	2014-03-10	2014-03-10T05:26:38	1394429198139	0.222705	0.205288	0.437056	0.0966749		2014.14	2014-02-21	2014-02-21T08:13:42	1392970422582	0.742134
2013.77	2013-10-08	2013-10-08T08:48:17	1381222097118	0.886422	0.851927	1.37148	0.553152		2013.86	2013-11-09	2013-11-09T06:22:32	1383978152691	1.19556	1.147	2.03421	0.629246		2013.68	2013-09-04	2013-09-04T03:41:33	1378266093252	0.930042	0.905012	1.44429	0.574265		2013.84	2013-10-31	2013-10-31T22:28:54	1383258534054	0.895158	0.870347	1.40482	0.534302		2014.1	2014-02-04	2014-02-04T15:15:18	1391526918549	0.222705	0.205288	0.437056	0.0966749		2014.05	2014-01-18	2014-01-18T13:40:57	1390052457223	0.742134
2013.68	2013-09-03	2013-09-03T12:09:51	1378210191758	0.886422	0.851927	1.37148	0.553152		2013.77	2013-10-05	2013-10-05T17:52:47	1380995567074	1.19556	1.147	2.03421	0.629246		2013.58	2013-07-30	2013-07-30T22:19:01	1375222741046	0.930042	0.905012	1.44429	0.574265		2013.74	2013-09-27	2013-09-27T07:51:32	1380268292924	0.895158	0.870347	1.40482	0.534302		2014.01	2014-01-02	2014-01-02T01:03:58	1388624638958	0.222705	0.205288	0.437056	0.0966749		2013.96	2013-12-15	2013-12-15T19:08:11	1387134491864	0.742134
2013.58	2013-07-30	2013-07-30T15:31:26	1375198286399	0.886422	0.851927	1.37148	0.553152		2013.67	2013-09-01	2013-09-01T05:23:01	1378012981457	1.19556	1.147	2.03421	0.629246		2013.49	2013-06-25	2013-06-25T16:56:28	1372179388840	0.930042	0.905012	1.44429	0.574265		2013.65	2013-08-23	2013-08-23T17:14:11	1377278051794	0.895158	0.870347	1.40482	0.534302		2013.92	2013-11-29	2013-11-29T10:52:39	1385722359368	0.222705	0.205288	0.437056	0.0966749		2013.87	2013-11-12	2013-11-12T00:35:26	1384216526506	0.742134
2013.49	2013-06-25	2013-06-25T18:53:01	1372186381039	0.886422	0.851927	1.37148	0.553152		2013.58	2013-07-28	2013-07-28T16:53:15	1375030395841	1.19556	1.147	2.03421	0.629246		2013.39	2013-05-21	2013-05-21T11:33:56	1369136036634	0.930042	0.905012	1.44429	0.574265		2013.55	2013-07-20	2013-07-20T02:36:50	1374287810664	0.89551	0.871571	1.40482	0.534302		2013.82	2013-10-26	2013-10-26T20:41:19	1382820079778	0.222705	0.205288	0.437056	0.0966749		2013.77	2013-10-09	2013-10-09T06:02:41	1381298561148	0.742134
2013.39	2013-05-21	2013-05-21T22:14:35	1369174475679	0.886422	0.851927	1.37148	0.553152		2013.48	2013-06-24	2013-06-24T04:23:30	1372047810224	1.19585	1.147	2.03421	0.628057		2013.29	2013-04-16	2013-04-16T06:11:24	1366092684427	0.930042	0.905012	1.44429	0.574265		2013.46	2013-06-15	2013-06-15T11:59:29	1371297569534	0.896559	0.871571	1.40482	0.536298		2013.73	2013-09-23	2013-09-23T06:30:00	1379917800188	0.222705	0.205288	0.437056	0.0966749		2013.68	2013-09-05	2013-09-05T11:29:55	1378380595789	0.742134
[truncated: 19 more columns]

## Sheet: H3N2_1
	Bayesian Skyline: H3_HA_BICEPS_1.log									Bayesian Skyline: H3_MP_BICEPS_1R.log									Bayesian Skyline: H3_NA_BICEPS_1.log									Bayesian Skyline: H3_NP_BICEPS_1R.log									Bayesian Skyline: H3_NS_BICEPS_1R.log									Bayesian Skyline: H3_PA_BICEPS_1.log
time	date	datetime	milliseconds	mean	median	upper	lower		time	date	datetime	milliseconds	mean	median	upper	lower		time	date	datetime	milliseconds	mean	median	upper	lower		time	date	datetime	milliseconds	mean	median	upper	lower		time	date	datetime	milliseconds	mean	median	upper	lower		time	date	datetime	milliseconds	mean
2022.73	2022-09-22	2022-09-22T21:48:00	1663883280663	3.86164	3.67675	6.80171	1.94359		2022.73	2022-09-22	2022-09-22T21:48:00	1663883280538	1.73377	1.58397	3.86288	0.459766		2022.73	2022-09-22	2022-09-22T21:48:00	1663883280869	2.73868	2.58786	5.23331	1.21372		2022.73	2022-09-22	2022-09-22T21:48:00	1663883280337	4.30877	4.13573	7.4233	2.18613		2022.73	2022-09-22	2022-09-22T21:48:00	1663883280603	1.97235	1.78681	4.68619	0.458711		2022.73	2022-09-22	2022-09-22T21:48:00	1663883280983	5.15176
2022.63	2022-08-18	2022-08-18T10:07:13	1660817233586	3.86164	3.67675	6.80171	1.94359		2022.63	2022-08-17	2022-08-17T03:01:37	1660705297437	1.73377	1.58397	3.86288	0.459766		2022.63	2022-08-16	2022-08-16T15:29:26	1660663766943	2.73868	2.58786	5.23331	1.21372		2022.62	2022-08-13	2022-08-13T20:42:39	1660423359214	4.30877	4.13573	7.4233	2.18613		2022.64	2022-08-19	2022-08-19T08:10:30	1660896630088	1.97235	1.78681	4.68619	0.458711		2022.62	2022-08-14	2022-08-14T05:00:41	1660453241342	5.15176
2022.54	2022-07-13	2022-07-13T22:26:26	1657751186509	3.86164	3.67675	6.80171	1.94359		2022.53	2022-07-11	2022-07-11T08:15:14	1657527314336	1.78779	1.63392	3.86288	0.566179		2022.53	2022-07-10	2022-07-10T09:10:53	1657444253018	2.73868	2.58786	5.23331	1.21372		2022.51	2022-07-04	2022-07-04T19:37:18	1656963438092	4.30877	4.13573	7.4233	2.18613		2022.54	2022-07-15	2022-07-15T18:32:59	1657909979574	1.97235	1.78681	4.68619	0.458711		2022.51	2022-07-05	2022-07-05T12:13:21	1657023201701	5.15176
2022.44	2022-06-08	2022-06-08T10:45:39	1654685139432	3.85158	3.67675	6.80171	1.8321		2022.43	2022-06-04	2022-06-04T13:28:51	1654349331235	0.763356	0.706189	1.50188	0.369568		2022.42	2022-06-03	2022-06-03T02:52:19	1654224739093	0.756619	0.673291	1.94581	0.379796		2022.4	2022-05-25	2022-05-25T18:31:56	1653503516970	1.33545	1.34417	2.71755	0.358768		2022.45	2022-06-11	2022-06-11T04:55:29	1654923329059	2.15927	1.9517	4.68619	0.789016		2022.4	2022-05-26	2022-05-26T19:26:02	1653593162060	1.22482
2022.34	2022-05-03	2022-05-03T23:04:52	1651619092355	0.905765	0.726802	2.64666	0.43395		2022.33	2022-04-28	2022-04-28T18:42:28	1651171348134	0.743968	0.705919	1.35281	0.369568		2022.32	2022-04-26	2022-04-26T20:33:45	1651005225168	0.695798	0.665634	1.18109	0.378557		2022.29	2022-04-15	2022-04-15T17:26:35	1650043595848	0.698718	0.64736	1.31936	0.342959		2022.35	2022-05-07	2022-05-07T15:17:58	1651936678545	1.10621	0.836596	3.14765	0.404402		2022.29	2022-04-17	2022-04-17T02:38:42	1650163122420	0.740229
2022.24	2022-03-29	2022-03-29T11:24:05	1648553045278	0.734255	0.702724	1.23623	0.430297		2022.23	2022-03-22	2022-03-22T23:56:05	1647993365032	0.743968	0.705919	1.35281	0.369568		2022.22	2022-03-20	2022-03-20T14:15:11	1647785711242	0.695798	0.665634	1.18109	0.378557		2022.18	2022-03-06	2022-03-06T16:21:14	1646583674726	0.698718	0.64736	1.31936	0.342959		2022.26	2022-04-03	2022-04-03T01:40:28	1648950028031	0.831296	0.783613	1.52019	0.404402		2022.19	2022-03-08	2022-03-08T09:51:22	1646733082779	0.740229
2022.15	2022-02-21	2022-02-21T23:43:18	1645486998201	0.734255	0.702724	1.23623	0.430297		2022.13	2022-02-14	2022-02-14T05:09:41	1644815381931	0.743968	0.705919	1.35281	0.369568		2022.12	2022-02-11	2022-02-11T07:56:37	1644566197317	0.695798	0.665634	1.18109	0.378557		2022.07	2022-01-25	2022-01-25T15:15:53	1643123753604	0.698718	0.64736	1.31936	0.342959		2022.16	2022-02-27	2022-02-27T12:02:57	1645963377516	0.831296	0.783613	1.52019	0.404402		2022.08	2022-01-27	2022-01-27T17:04:03	1643303043138	0.740229
2022.05	2022-01-17	2022-01-17T12:02:31	1642420951125	0.734255	0.702724	1.23623	0.430297		2022.02	2022-01-08	2022-01-08T10:23:18	1641637398830	0.743968	0.705919	1.35281	0.369568		2022.02	2022-01-05	2022-01-05T01:38:03	1641346683392	0.695798	0.665634	1.18109	0.378557		2021.96	2021-12-16	2021-12-16T14:10:32	1639663832482	0.698718	0.64736	1.31936	0.342959		2022.07	2022-01-23	2022-01-23T22:25:27	1642976727002	0.831296	0.783613	1.52019	0.404402		2021.97	2021-12-19	2021-12-19T00:16:43	1639873003498	0.740229
2021.95	2021-12-13	2021-12-13T00:21:44	1639354904048	0.734255	0.702724	1.23623	0.430297		2021.92	2021-12-02	2021-12-02T15:36:55	1638459415729	0.743968	0.705919	1.35281	0.369568		2021.91	2021-11-28	2021-11-28T19:19:29	1638127169467	0.695798	0.665634	1.18109	0.378557		2021.85	2021-11-06	2021-11-06T13:05:11	1636203911360	0.698718	0.64736	1.31936	0.342959		2021.97	2021-12-20	2021-12-20T08:47:56	1639990076488	0.831296	0.783613	1.52019	0.404402		2021.86	2021-11-09	2021-11-09T07:29:23	1636442963857	0.740229
2021.85	2021-11-07	2021-11-07T12:40:56	1636288856971	0.734255	0.702724	1.23623	0.430297		2021.82	2021-10-26	2021-10-26T20:50:32	1635281432628	0.743968	0.705919	1.35281	0.369568		2021.81	2021-10-22	2021-10-22T13:00:55	1634907655542	0.695798	0.665634	1.18109	0.378557		2021.74	2021-09-27	2021-09-27T11:59:50	1632743990238	0.698718	0.64736	1.31936	0.342959		2021.88	2021-11-15	2021-11-15T19:10:25	1637003425973	0.831296	0.783613	1.52019	0.404402		2021.75	2021-09-30	2021-09-30T14:42:04	1633012924216	0.740229
2021.76	2021-10-03	2021-10-03T01:00:09	1633222809894	0.734255	0.702724	1.23623	0.430297		2021.72	2021-09-20	2021-09-20T02:04:09	1632103449526	0.743968	0.705919	1.35281	0.369568		2021.71	2021-09-15	2021-09-15T06:42:21	1631688141616	0.695798	0.665634	1.18109	0.378557		2021.63	2021-08-18	2021-08-18T10:54:29	1629284069116	0.698718	0.64736	1.31936	0.342959		2021.78	2021-10-12	2021-10-12T05:32:55	1634016775459	0.831296	0.783613	1.52019	0.404402		2021.64	2021-08-21	2021-08-21T21:54:44	1629582884576	0.740229
2021.66	2021-08-28	2021-08-28T13:19:22	1630156762817	0.734255	0.702724	1.23623	0.430297		2021.62	2021-08-14	2021-08-14T07:17:46	1628925466425	0.743968	0.705919	1.35281	0.369568		2021.61	2021-08-09	2021-08-09T00:23:47	1628468627691	0.695798	0.665634	1.18109	0.378557		2021.52	2021-07-09	2021-07-09T09:49:07	1625824147994	0.698718	0.64736	1.31936	0.342959		2021.69	2021-09-07	2021-09-07T15:55:24	1631030124945	0.831296	0.783613	1.52019	0.404402		2021.53	2021-07-13	2021-07-13T05:07:24	1626152844935	0.740229
2021.56	2021-07-24	2021-07-24T01:38:35	1627090715741	0.734255	0.702724	1.23623	0.430297		2021.52	2021-07-08	2021-07-08T12:31:23	1625747483324	0.743968	0.705919	1.35281	0.369568		2021.5	2021-07-02	2021-07-02T18:05:13	1625249113766	0.695798	0.665634	1.18109	0.378557		2021.41	2021-05-30	2021-05-30T08:43:46	1622364226872	0.698718	0.64736	1.31936	0.342959		2021.59	2021-08-04	2021-08-04T02:17:54	1628043474430	0.831296	0.783613	1.52019	0.404402		2021.42	2021-06-03	2021-06-03T12:20:05	1622722805294	0.740229
2021.47	2021-06-18	2021-06-18T13:57:48	1624024668664	0.734255	0.702724	1.23623	0.430297		2021.42	2021-06-01	2021-06-01T17:45:00	1622569500223	0.743968	0.705919	1.35281	0.369568		2021.4	2021-05-26	2021-05-26T11:46:39	1622029599841	0.695798	0.665634	1.18109	0.378557		2021.3	2021-04-20	2021-04-20T07:38:25	1618904305750	0.698718	0.64736	1.31936	0.342959		2021.5	2021-06-30	2021-06-30T12:40:23	1625056823916	0.831296	0.783613	1.52019	0.404402		2021.32	2021-04-24	2021-04-24T19:32:45	1619292765654	0.740229
2021.37	2021-05-14	2021-05-14T02:17:01	1620958621587	0.734255	0.702724	1.23623	0.430297		2021.32	2021-04-25	2021-04-25T22:58:37	1619391517121	0.743968	0.705919	1.35281	0.369568		2021.3	2021-04-19	2021-04-19T05:28:05	1618810085915	0.695798	0.665634	1.18109	0.378557		2021.19	2021-03-11	2021-03-11T06:33:04	1615444384628	0.698718	0.64736	1.31936	0.342959		2021.4	2021-05-26	2021-05-26T23:02:53	1622070173402	0.831296	0.783613	1.52019	0.404402		2021.21	2021-03-16	2021-03-16T02:45:26	1615862726013	0.740229
2021.27	2021-04-08	2021-04-08T14:36:14	1617892574510	0.734255	0.702724	1.23623	0.430297		2021.22	2021-03-20	2021-03-20T04:12:14	1616213534020	0.743968	0.705919	1.35281	0.369568		2021.2	2021-03-12	2021-03-12T23:09:31	1615590571990	0.695798	0.665634	1.18109	0.378557		2021.08	2021-01-30	2021-01-30T05:27:43	1611984463506	0.698718	0.64736	1.31936	0.342959		2021.31	2021-04-22	2021-04-22T09:25:22	1619083522887	0.831296	0.783613	1.52019	0.404402		2021.1	2021-02-04	2021-02-04T09:58:06	1612432686372	0.740229
2021.17	2021-03-04	2021-03-04T02:55:27	1614826527433	0.734255	0.702724	1.23623	0.430297		2021.12	2021-02-11	2021-02-11T09:25:50	1613035550919	0.743968	0.705919	1.35281	0.369568		2021.1	2021-02-03	2021-02-03T16:50:58	1612371058065	0.695798	0.665634	1.18109	0.378557		2020.97	2020-12-20	2020-12-20T04:22:22	1608438142384	0.698718	0.64736	1.31936	0.342959		2021.21	2021-03-18	2021-03-18T19:47:52	1616096872373	0.831296	0.783613	1.52019	0.404402		2020.99	2020-12-25	2020-12-25T17:10:46	1608916246731	0.740229
2021.08	2021-01-27	2021-01-27T15:14:40	1611760480356	0.734255	0.702724	1.23623	0.430297		2021.02	2021-01-05	2021-01-05T14:39:27	1609857567818	0.743968	0.705919	1.35281	0.369568		2020.99	2020-12-27	2020-12-27T10:32:24	1609065144140	0.695798	0.665634	1.18109	0.378557		2020.86	2020-11-10	2020-11-10T03:17:01	1604978221262	0.698718	0.64736	1.31936	0.342959		2021.12	2021-02-12	2021-02-12T06:10:21	1613110221859	0.831296	0.783613	1.52019	0.404402		2020.88	2020-11-16	2020-11-16T00:23:27	1605486207091	0.740229
2020.98	2020-12-22	2020-12-22T03:33:53	1608608033279	0.734255	0.702724	1.23623	0.430297		2020.92	2020-11-28	2020-11-28T19:53:04	1606593184717	0.743968	0.705919	1.35281	0.369568		2020.89	2020-11-20	2020-11-20T04:13:50	1605845630227	0.695798	0.665634	1.18109	0.378557		2020.76	2020-10-01	2020-10-01T02:11:40	1601518300139	0.698718	0.64736	1.31936	0.342959		2021.03	2021-01-08	2021-01-08T16:32:51	1610123571345	0.831296	0.783613	1.52019	0.404402		2020.77	2020-10-07	2020-10-07T07:36:07	1602056167450	0.740229
2020.88	2020-11-16	2020-11-16T15:53:06	1605541986202	0.734255	0.702724	1.23623	0.430297		2020.82	2020-10-23	2020-10-23T01:06:41	1603415201615	0.743968	0.705919	1.35281	0.369568		2020.79	2020-10-13	2020-10-13T21:55:16	1602626116301	0.695798	0.665634	1.18109	0.378557		2020.65	2020-08-22	2020-08-22T01:06:19	1598058379017	0.698718	0.64736	1.31936	0.342959		2020.93	2020-12-04	2020-12-04T02:55:20	1607050520831	0.831296	0.783613	1.52019	0.404402		2020.66	2020-08-28	2020-08-28T14:48:47	1598626127809	0.740229
2020.79	2020-10-12	2020-10-12T04:12:19	1602475939125	0.734255	0.702724	1.23623	0.430297		2020.71	2020-09-16	2020-09-16T06:20:18	1600237218514	0.743968	0.705919	1.35281	0.369568		2020.69	2020-09-06	2020-09-06T15:36:42	1599406602376	0.695798	0.665634	1.18109	0.378557		2020.54	2020-07-13	2020-07-13T00:00:57	1594598457895	0.698718	0.64736	1.31936	0.342959		2020.84	2020-10-30	2020-10-30T13:17:50	1604063870316	0.831296	0.783613	1.52019	0.404402		2020.55	2020-07-19	2020-07-19T22:01:28	1595196088169	0.740229
2020.69	2020-09-06	2020-09-06T16:31:32	1599409892048	0.734255	0.702724	1.23623	0.430297		2020.61	2020-08-10	2020-08-10T11:33:55	1597059235413	0.743968	0.705919	1.35281	0.369568		2020.59	2020-07-31	2020-07-31T09:18:08	1596187088451	0.695798	0.665634	1.18109	0.378557		2020.43	2020-06-02	2020-06-02T22:55:36	1591138536773	0.698718	0.64736	1.31936	0.342959		2020.74	2020-09-25	2020-09-25T23:40:19	1601077219802	0.831296	0.783613	1.52019	0.404402		2020.45	2020-06-10	2020-06-10T05:14:08	1591766048528	0.740229
2020.59	2020-08-02	2020-08-02T04:50:44	1596343844971	0.734255	0.702724	1.23623	0.430297		2020.51	2020-07-04	2020-07-04T16:47:32	1593881252312	0.743968	0.705919	1.35281	0.369568		2020.48	2020-06-24	2020-06-24T02:59:34	1592967574526	0.695798	0.665634	1.18109	0.378557		2020.32	2020-04-23	2020-04-23T21:50:15	1587678615651	0.698718	0.64736	1.31936	0.342959		2020.65	2020-08-22	2020-08-22T10:02:49	1598090569288	0.831296	0.783613	1.52019	0.404402		2020.34	2020-05-01	2020-05-01T12:26:48	1588336008888	0.740229
2020.49	2020-06-27	2020-06-27T17:09:57	1593277797895	0.734255	0.702724	1.23623	0.430297		2020.41	2020-05-28	2020-05-28T22:01:09	1590703269211	0.743968	0.705919	1.35281	0.369568		2020.38	2020-05-17	2020-05-17T20:41:00	1589748060601	0.695798	0.665634	1.18109	0.378557		2020.21	2020-03-14	2020-03-14T20:44:54	1584218694529	0.698718	0.64736	1.31936	0.342959		2020.55	2020-07-18	2020-07-18T20:25:18	1595103918773	0.831296	0.783613	1.52019	0.404402		2020.23	2020-03-22	2020-03-22T19:39:29	1584905969248	0.740229
2020.4	2020-05-23	2020-05-23T05:29:10	1590211750818	0.734255	0.702724	1.23623	0.430297		2020.31	2020-04-22	2020-04-22T03:14:46	1587525286110	0.743968	0.705919	1.35281	0.369568		2020.28	2020-04-10	2020-04-10T14:22:26	1586528546675	0.695798	0.665634	1.18109	0.378557		2020.1	2020-02-03	2020-02-03T19:39:33	1580758773407	0.698718	0.64736	1.31936	0.342959		2020.46	2020-06-14	2020-06-14T06:47:48	1592117268259	0.831296	0.783613	1.52019	0.404402		2020.12	2020-02-12	2020-02-12T02:52:09	1581475929607	0.740229
2020.3	2020-04-17	2020-04-17T17:48:23	1587145703743	0.734255	0.702724	1.23623	0.430297		2020.21	2020-03-16	2020-03-16T08:28:23	1584347303009	0.743968	0.705919	1.35281	0.369568		2020.18	2020-03-04	2020-03-04T08:03:52	1583309032750	0.695798	0.665634	1.18109	0.378557		2019.99	2019-12-25	2019-12-25T18:34:12	1577298852285	0.698718	0.64736	1.31936	0.342959		2020.36	2020-05-10	2020-05-10T17:10:17	1589130617745	0.831296	0.783613	1.52019	0.404402		2020.01	2020-01-03	2020-01-03T10:04:49	1578045889966	0.740229
2020.2	2020-03-13	2020-03-13T06:07:36	1584079656666	0.734255	0.702724	1.23623	0.430297		2020.11	2020-02-08	2020-02-08T13:41:59	1581169319908	0.743968	0.705919	1.35281	0.369568		2020.08	2020-01-27	2020-01-27T01:45:18	1580089518825	0.695798	0.665634	1.18109	0.378557		2019.88	2019-11-15	2019-11-15T17:28:51	1573838931163	0.698718	0.64736	1.31936	0.342959		2020.27	2020-04-06	2020-04-06T03:32:47	1586143967230	0.831296	0.783613	1.52019	0.404402		2019.9	2019-11-24	2019-11-24T17:17:30	1574615850326	0.740229
2020.1	2020-02-06	2020-02-06T18:26:49	1581013609589	0.734255	0.702724	1.23623	0.430297		2020.01	2020-01-02	2020-01-02T18:55:36	1577991336807	0.743968	0.705919	1.35281	0.369568		2019.97	2019-12-20	2019-12-20T19:26:44	1576870004900	0.695798	0.665634	1.18109	0.378557		2019.77	2019-10-06	2019-10-06T16:23:30	1570379010041	0.698718	0.64736	1.31936	0.342959		2020.17	2020-03-02	2020-03-02T13:55:16	1583157316716	0.831296	0.783613	1.52019	0.404402		2019.79	2019-10-16	2019-10-16T00:30:10	1571185810685	0.740229
2020.01	2020-01-02	2020-01-02T06:46:02	1577947562512	0.734255	0.702724	1.23623	0.430297		2019.91	2019-11-27	2019-11-27T00:09:13	1574813353705	0.743968	0.705919	1.35281	0.369568		2019.87	2019-11-13	2019-11-13T13:08:10	1573650490974	0.695798	0.665634	1.18109	0.378557		2019.66	2019-08-27	2019-08-27T15:18:08	1566919088930	0.698718	0.64736	1.31936	0.342959		2020.08	2020-01-28	2020-01-28T00:17:46	1580170666202	0.831296	0.783613	1.52019	0.404402		2019.68	2019-09-06	2019-09-06T07:42:51	1567755771044	0.740229
2019.91	2019-11-27	2019-11-27T19:05:15	1574881515435	0.734255	0.702724	1.23623	0.430297		2019.81	2019-10-21	2019-10-21T05:22:50	1571635370604	0.743968	0.705919	1.35281	0.369568		2019.77	2019-10-07	2019-10-07T06:49:37	1570430977049	0.695798	0.665634	1.18109	0.378557		2019.55	2019-07-18	2019-07-18T14:12:47	1563459167808	5.88901	5.62269	10.1781	3.05803		2019.98	2019-12-24	2019-12-24T10:40:15	1577184015687	0.831296	0.783613	1.52019	0.404402		2019.58	2019-07-28	2019-07-28T14:55:31	1564325731403	8.31729
2019.81	2019-10-23	2019-10-23T07:24:28	1571815468358	0.734255	0.702724	1.23623	0.430297		2019.71	2019-09-14	2019-09-14T10:36:27	1568457387503	0.743968	0.705919	1.35281	0.369568		2019.67	2019-08-31	2019-08-31T00:31:03	1567211463124	0.695798	0.665634	1.18109	0.378557		2019.44	2019-06-08	2019-06-08T13:07:26	1559999246686	5.95307	5.65275	10.1781	3.27939		2019.89	2019-11-19	2019-11-19T21:02:45	1574197365173	0.831296	0.783613	1.52019	0.404402		2019.47	2019-06-18	2019-06-18T22:08:11	1560895691763	8.31555
2019.72	2019-09-17	2019-09-17T19:43:41	1568749421281	0.734255	0.702724	1.23623	0.430297		2019.61	2019-08-08	2019-08-08T15:50:04	1565279404402	3.39393	3.15597	6.81794	1.44957		2019.57	2019-07-24	2019-07-24T18:12:29	1563991949199	5.24265	5.01399	9.02336	2.76211		2019.33	2019-04-29	2019-04-29T12:02:05	1556539325564	2.72533	2.59208	4.59408	1.29555		2019.79	2019-10-16	2019-10-16T07:25:14	1571210714659	0.831296	0.783613	1.52019	0.404402		2019.36	2019-05-10	2019-05-10T05:20:52	1557465652122	3.70103
2019.62	2019-08-13	2019-08-13T08:02:54	1565683374204	0.734255	0.702724	1.23623	0.430297		2019.51	2019-07-02	2019-07-02T21:03:41	1562101421301	3.42874	3.1768	6.86519	1.53216		2019.46	2019-06-17	2019-06-17T11:53:55	1560772435274	5.28099	5.04345	9.02336	2.91098		2019.22	2019-03-20	2019-03-20T10:56:44	1553079404442	1.35553	1.12113	4.31256	0.657164		2019.7	2019-09-11	2019-09-11T17:47:44	1568224064144	0.831296	0.783613	1.52019	0.404402		2019.25	2019-03-31	2019-03-31T12:33:32	1554035612481	3.01821
2019.52	2019-07-08	2019-07-08T20:22:07	1562617327128	5.78841	5.74708	9.19697	1.26593		2019.4	2019-05-27	2019-05-27T02:17:18	1558923438199	2.38115	2.26919	4.18172	1.16904		2019.36	2019-05-11	2019-05-11T05:35:21	1557552921348	4.20261	4.04536	6.90258	2.33524		2019.11	2019-02-08	2019-02-08T09:51:23	1549619483320	1.16125	1.09908	2.01016	0.653979		2019.6	2019-08-08	2019-08-08T04:10:13	1565237413630	0.831296	0.783613	1.52019	0.404402		2019.14	2019-02-19	2019-02-19T19:46:12	1550605572841	2.11935
2019.42	2019-06-03	2019-06-03T08:41:20	1559551280052	5.96672	5.78488	9.23547	3.68403		2019.3	2019-04-20	2019-04-20T07:30:55	1555745455098	1.69184	1.49264	4.05456	0.813524		2019.26	2019-04-03	2019-04-03T23:16:47	1554333407423	3.72898	3.82279	6.89805	1.29445		2019	2018-12-30	2018-12-30T08:46:02	1546159562198	1.16125	1.09908	2.01016	0.653979		2019.51	2019-07-04	2019-07-04T14:32:43	1562250763116	7.15239	6.84787	12.1661	3.62481		2019.03	2019-01-11	2019-01-11T02:58:53	1547175533200	2.10742
2019.33	2019-04-28	2019-04-28T21:00:32	1556485232975	2.83783	2.56296	6.66218	1.4945		2019.2	2019-03-14	2019-03-14T12:44:31	1552567471997	1.50785	1.44808	2.58209	0.801216		2019.16	2019-02-25	2019-02-25T16:58:13	1551113893498	2.10397	1.91751	5.61157	1.16833		2018.89	2018-11-20	2018-11-20T07:40:41	1542699641076	1.16125	1.09908	2.01016	0.653979		2019.42	2019-05-31	2019-05-31T00:55:12	1559264112601	7.15239	6.84787	12.1661	3.62481		2018.92	2018-12-02	2018-12-02T10:11:33	1543745493559	2.10742
2019.23	2019-03-24	2019-03-24T09:19:45	1553419185898	1.9565	1.50531	4.34567	0.78429		2019.1	2019-02-05	2019-02-05T17:58:08	1549389488896	1.50785	1.44808	2.58209	0.801216		2019.05	2019-01-19	2019-01-19T10:39:39	1547894379573	1.95966	1.87443	3.20899	1.16833		2018.78	2018-10-11	2018-10-11T06:35:19	1539239719953	1.16125	1.09908	2.01016	0.653979		2019.32	2019-04-26	2019-04-26T11:17:42	1556277462087	3.86177	2.74941	12.0117	1.52731		2018.81	2018-10-23	2018-10-23T17:24:13	1540315453919	2.10742
2019.13	2019-02-16	2019-02-16T21:38:58	1550353138821	1.3192	1.27068	2.1242	0.771515		2019	2018-12-30	2018-12-30T23:11:45	1546211505794	1.50785	1.44808	2.58209	0.801216		2018.95	2018-12-13	2018-12-13T04:21:05	1544674865648	1.95966	1.87443	3.20899	1.16833		2018.67	2018-09-01	2018-09-01T05:29:58	1535779798831	1.68093	1.63439	2.67375	0.960049		2019.23	2019-03-22	2019-03-22T21:40:11	1553290811573	2.17919	1.75947	4.98799	0.706652		2018.71	2018-09-14	2018-09-14T00:36:54	1536885414278	2.11795
2019.04	2019-01-12	2019-01-12T09:58:11	1547287091744	1.31611	1.27068	2.11844	0.771515		2018.9	2018-11-24	2018-11-24T04:25:22	1543033522693	1.50785	1.44808	2.58209	0.801216		2018.85	2018-11-05	2018-11-05T22:02:31	1541455351722	1.95966	1.87443	3.20899	1.16833		2018.56	2018-07-23	2018-07-23T04:24:37	1532319877709	1.71922	1.67592	2.71762	0.947868		2019.13	2019-02-16	2019-02-16T08:02:41	1550304161058	1.38186	1.26903	2.71429	0.693119		2018.6	2018-08-05	2018-08-05T07:49:34	1533455374637	1.70706
2018.94	2018-12-07	2018-12-07T22:17:24	1544221044667	1.31611	1.27068	2.11844	0.771515		2018.8	2018-10-18	2018-10-18T09:38:59	1539855539592	1.50785	1.44808	2.58209	0.801216		2018.75	2018-09-29	2018-09-29T15:43:57	1538235837797	1.95966	1.87443	3.20899	1.16833		2018.45	2018-06-13	2018-06-13T03:19:16	1528859956587	1.71922	1.67592	2.71762	0.947868		2019.04	2019-01-12	2019-01-12T18:25:10	1547317510544	1.32438	1.26744	2.2809	0.693119		2018.49	2018-06-26	2018-06-26T15:02:14	1530025334997	1.70706
2018.84	2018-11-02	2018-11-02T10:36:37	1541154997590	1.31611	1.27068	2.11844	0.771515		2018.7	2018-09-11	2018-09-11T14:52:36	1536677556491	2.42283	2.3534	3.8859	1.44009		2018.65	2018-08-23	2018-08-23T09:25:23	1535016323874	2.45834	2.38621	3.82073	1.47261		2018.34	2018-05-04	2018-05-04T02:13:55	1525400035465	1.71922	1.67592	2.71762	0.947868		2018.94	2018-12-09	2018-12-09T04:47:40	1544330860029	1.32438	1.26744	2.2809	0.693119		2018.38	2018-05-17	2018-05-17T22:14:55	1526595295356	1.70706
2018.74	2018-09-27	2018-09-27T22:55:50	1538088950513	1.31611	1.27068	2.11844	0.771515		2018.6	2018-08-05	2018-08-05T20:06:13	1533499573390	2.44468	2.37501	3.8859	1.42953		2018.54	2018-07-17	2018-07-17T03:06:49	1531796809949	2.43591	2.37809	3.7724	1.44737		2018.23	2018-03-25	2018-03-25T01:08:34	1521940114343	1.71922	1.67592	2.71762	0.947868		2018.85	2018-11-04	2018-11-04T15:10:09	1541344209515	1.32438	1.26744	2.2809	0.693119		2018.27	2018-04-08	2018-04-08T05:27:35	1523165255715	1.70706
2018.65	2018-08-23	2018-08-23T11:15:03	1535022903436	2.23881	2.20418	3.62438	1.27277		2018.5	2018-06-30	2018-06-30T01:19:50	1530321590288	2.44468	2.37501	3.8859	1.42953		2018.44	2018-06-09	2018-06-09T20:48:16	1528577296023	2.43591	2.37809	3.7724	1.44737		2018.12	2018-02-13	2018-02-13T00:03:13	1518480193221	1.71922	1.67592	2.71762	0.947868		2018.75	2018-10-01	2018-10-01T01:32:39	1538357559001	1.32438	1.26744	2.2809	0.693119		2018.16	2018-02-27	2018-02-27T12:40:16	1519735216074	1.70706
2018.55	2018-07-18	2018-07-18T23:34:16	1531956856360	2.38973	2.32162	3.66011	1.50313		2018.4	2018-05-24	2018-05-24T06:33:27	1527143607187	2.44468	2.37501	3.8859	1.42953		2018.34	2018-05-03	2018-05-03T14:29:42	1525357782098	2.43591	2.37809	3.7724	1.44737		2018.01	2018-01-03	2018-01-03T22:57:52	1515020272099	1.99826	1.75909	4.93169	1.0798		2018.66	2018-08-27	2018-08-27T11:55:08	1535370908486	1.52224	1.39006	3.12911	0.82262		2018.05	2018-01-18	2018-01-18T19:52:56	1516305176434	1.75851
2018.45	2018-06-13	2018-06-13T11:53:29	1528890809283	2.38973	2.32162	3.66011	1.50313		2018.3	2018-04-17	2018-04-17T11:47:04	1523965624086	2.44468	2.37501	3.8859	1.42953		2018.24	2018-03-27	2018-03-27T08:11:08	1522138268173	2.43591	2.37809	3.7724	1.44737		2017.9	2017-11-24	2017-11-24T21:52:30	1511560350977	3.18225	2.48323	7.42827	1.26724		2018.56	2018-07-23	2018-07-23T22:17:37	1532384257974	2.31587	2.2209	3.94393	1.27759		2017.94	2017-12-10	2017-12-10T03:05:36	1512875136793	3.03348
2018.35	2018-05-09	2018-05-09T00:12:42	1525824762206	2.38973	2.32162	3.66011	1.50313		2018.2	2018-03-11	2018-03-11T17:00:40	1520787640985	2.44468	2.37501	3.8859	1.42953		2018.14	2018-02-18	2018-02-18T01:52:34	1518918754248	2.43591	2.37809	3.7724	1.44737		2017.79	2017-10-15	2017-10-15T20:47:09	1508100429855	4.42293	4.264	8.03226	1.7878		2018.47	2018-06-19	2018-06-19T08:40:07	1529397607460	2.31587	2.2209	3.94393	1.27759		2017.84	2017-10-31	2017-10-31T10:18:17	1509445097152	6.11873
2018.26	2018-04-03	2018-04-03T12:31:55	1522758715130	2.38973	2.32162	3.66011	1.50313		2018.09	2018-02-02	2018-02-02T22:14:17	1517609657883	2.44868	2.37501	3.91319	1.42953		2018.03	2018-01-11	2018-01-11T19:34:00	1515699240323	2.45231	2.38578	3.79348	1.45612		2017.68	2017-09-05	2017-09-05T19:41:48	1504640508733	4.73204	4.49239	8.03257	2.53794		2018.37	2018-05-15	2018-05-15T19:02:36	1526410956945	2.31587	2.2209	3.94393	1.27759		2017.73	2017-09-21	2017-09-21T17:30:57	1506015057512	7.23823
2018.16	2018-02-27	2018-02-27T00:51:08	1519692668053	2.38973	2.32162	3.66011	1.50313		2017.99	2017-12-28	2017-12-28T03:27:54	1514431674782	2.51655	2.40428	4.3317	1.46278		2017.93	2017-12-05	2017-12-05T13:15:26	1512479726397	2.75955	2.57562	5.42725	1.6398		2017.57	2017-07-27	2017-07-27T18:36:27	1501180587611	4.73204	4.49239	8.03257	2.53794		2018.28	2018-04-11	2018-04-11T05:25:06	1523424306431	2.31587	2.2209	3.94393	1.27759		2017.62	2017-08-13	2017-08-13T00:43:37	1502585017871	7.2483
2018.06	2018-01-22	2018-01-22T13:10:20	1516626620976	2.38973	2.32162	3.66011	1.50313		2017.89	2017-11-21	2017-11-21T08:41:31	1511253691681	3.26678	2.82995	6.91031	1.63539		2017.83	2017-10-29	2017-10-29T06:56:52	1509260212472	3.55434	3.2405	6.47944	1.856		2017.46	2017-06-17	2017-06-17T17:31:06	1497720666489	3.77847	3.24151	8.0102	1.42519		2018.18	2018-03-07	2018-03-07T15:47:35	1520437655917	2.31587	2.2209	3.94393	1.27759		2017.51	2017-07-04	2017-07-04T07:56:18	1499154978230	6.29349
2017.97	2017-12-18	2017-12-18T01:29:33	1513560573900	2.40168	2.32277	3.67027	1.50438		2017.79	2017-10-15	2017-10-15T13:55:08	1508075708580	4.8281	4.657	8.89746	2.16045		2017.73	2017-09-22	2017-09-22T00:38:18	1506040698547	4.4753	4.29376	7.49167	2.32402		2017.35	2017-05-08	2017-05-08T16:25:45	1494260745367	3.21719	2.98262	5.78662	1.73433		2018.09	2018-02-01	2018-02-01T02:10:05	1517451005402	2.32197	2.22212	3.95675	1.29048		2017.4	2017-05-25	2017-05-25T15:08:58	1495724938590	3.06351
2017.87	2017-11-12	2017-11-12T13:48:46	1510494526823	2.55224	2.37689	5.54773	1.53574		2017.69	2017-09-08	2017-09-08T19:08:45	1504897725479	5.14461	4.97473	9.12507	2.64601		2017.63	2017-08-15	2017-08-15T18:19:44	1502821184622	4.50824	4.31884	7.51825	2.32976		2017.24	2017-03-29	2017-03-29T15:20:24	1490800824245	2.86446	2.75734	4.65805	1.66956		2017.99	2017-12-28	2017-12-28T12:32:34	1514464354888	2.40612	2.24704	4.32564	1.30662		2017.29	2017-04-15	2017-04-15T22:21:38	1492294898949	2.54019
2017.77	2017-10-08	2017-10-08T02:07:59	1507428479746	4.2501	3.19267	9.35792	1.82409		2017.59	2017-08-03	2017-08-03T00:22:22	1501719742377	5.14461	4.97473	9.12507	2.64601		2017.52	2017-07-09	2017-07-09T12:01:10	1499601670696	3.98918	3.75961	7.51825	1.51511		2017.13	2017-02-17	2017-02-17T14:15:03	1487340903123	2.86446	2.75734	4.65805	1.66956		2017.9	2017-11-23	2017-11-23T22:55:04	1511477704374	3.17295	2.48699	9.34965	1.38646		2017.18	2017-03-07	2017-03-07T05:34:19	1488864859308	2.54019
2017.67	2017-09-02	2017-09-02T14:27:12	1504362432669	6.29844	6.22694	9.91087	2.8861		2017.49	2017-06-27	2017-06-27T05:35:59	1498541759276	2.71124	2.5136	5.05032	1.37077		2017.42	2017-06-02	2017-06-02T05:42:36	1496382156771	2.53335	2.27063	4.87405	1.37252		2017.02	2017-01-08	2017-01-08T13:09:42	1483880982001	2.86446	2.75734	4.65805	1.66956		2017.81	2017-10-20	2017-10-20T09:17:33	1508491053859	5.29905	4.15062	12.5048	1.67629		2017.07	2017-01-26	2017-01-26T12:46:59	1485434819668	2.54019
2017.58	2017-07-29	2017-07-29T02:46:25	1501296385592	6.53058	6.35399	10.1586	3.85808		2017.39	2017-05-21	2017-05-21T10:49:36	1495363776175	1.93954	1.82805	3.29017	1.03929		2017.32	2017-04-25	2017-04-25T23:24:02	1493162642846	2.20628	2.09539	3.51451	1.34511		2016.92	2016-11-28	2016-11-28T12:04:20	1480334660879	2.86446	2.75734	4.65805	1.66956		2017.71	2017-09-15	2017-09-15T19:40:03	1505504403345	7.32674	7.26917	13.7336	2.14087		2016.97	2016-12-16	2016-12-16T19:59:40	1481918380027	2.54019
2017.48	2017-06-23	2017-06-23T15:05:38	1498230338515	6.53058	6.35399	10.1586	3.85808		2017.29	2017-04-14	2017-04-14T16:03:13	1492185793074	1.90121	1.82221	3.10338	1.03929		2017.22	2017-03-19	2017-03-19T17:05:28	1489943128921	2.20628	2.09539	3.51451	1.34511		2016.81	2016-10-19	2016-10-19T10:58:59	1476874739756	2.8699	2.76808	4.66004	1.66956		2017.62	2017-08-12	2017-08-12T06:02:32	1502517752831	8.12545	7.78338	14.0399	4.2254		2016.86	2016-11-07	2016-11-07T03:12:20	1478488340386	2.54019
2017.38	2017-05-19	2017-05-19T03:24:51	1495164291438	3.58581	3.37168	6.21198	1.89866		2017.19	2017-03-08	2017-03-08T21:16:49	1489007809973	1.90121	1.82221	3.10338	1.03929		2017.12	2017-02-10	2017-02-10T10:46:54	1486723614996	2.20628	2.09539	3.51451	1.34511		2016.7	2016-09-09	2016-09-09T09:53:38	1473414818634	5.16004	4.88026	9.20682	2.44832		2017.52	2017-07-08	2017-07-08T16:25:02	1499531102316	8.14405	7.79568	14.0399	4.33174		2016.75	2016-09-28	2016-09-28T10:25:00	1475058300745	3.76195
2017.29	2017-04-13	2017-04-13T15:44:04	1492098244361	4.20992	4.11245	6.64302	2.5735		2017.09	2017-01-31	2017-01-31T02:30:26	1485829826871	1.90121	1.82221	3.10338	1.03929		2017.01	2017-01-04	2017-01-04T04:28:21	1483504101070	2.20628	2.09539	3.51451	1.34511		2016.59	2016-07-31	2016-07-31T08:48:17	1469954897512	4.93664	4.77989	9.24036	2.04837		2017.43	2017-06-04	2017-06-04T02:47:31	1496544451802	7.12179	7.55743	14.0399	1.74631		2016.64	2016-08-19	2016-08-19T17:37:41	1471628261105	3.68963
2017.19	2017-03-09	2017-03-09T04:03:17	1489032197285	4.19392	4.10772	6.62194	2.5735		2016.99	2016-12-24	2016-12-24T07:44:03	1482565443770	1.93313	1.84301	3.21191	1.08835		2016.91	2016-11-26	2016-11-26T22:09:47	1480198187148	2.20628	2.09539	3.51451	1.34511		2016.48	2016-06-21	2016-06-21T07:42:56	1466494976390	3.37704	3.25273	5.40617	1.99385		2017.33	2017-04-30	2017-04-30T13:10:01	1493557801288	2.593	2.02622	5.66181	0.75886		2016.53	2016-07-11	2016-07-11T00:50:21	1468198221464	3.14497
2017.09	2017-02-01	2017-02-01T16:22:30	1485966150208	4.19392	4.10772	6.62194	2.5735		2016.89	2016-11-17	2016-11-17T12:57:40	1479387460669	2.06663	1.93901	3.63064	1.1642		2016.81	2016-10-20	2016-10-20T15:51:13	1476978673223	2.43259	2.18962	4.99564	1.37252		2016.37	2016-05-12	2016-05-12T06:37:35	1463035055268	3.43634	3.29608	5.54571	1.97539		2017.24	2017-03-26	2017-03-26T23:32:30	1490571150773	1.40855	1.33965	2.39493	0.735875		2016.42	2016-06-01	2016-06-01T08:03:01	1464768181823	2.89977
2016.99	2016-12-27	2016-12-27T04:41:43	1482813703132	4.19392	4.10772	6.62194	2.5735		2016.78	2016-10-11	2016-10-11T18:11:17	1476209477568	2.83963	2.71622	5.12925	1.3103		2016.71	2016-09-13	2016-09-13T09:32:39	1473759159298	4.48978	4.29826	7.51503	2.47938		2016.26	2016-04-02	2016-04-02T05:32:14	1459575134146	3.39031	3.27883	5.34825	1.95921		2017.14	2017-02-20	2017-02-20T09:55:00	1487584500259	1.39651	1.33965	2.36534	0.735875		2016.31	2016-04-22	2016-04-22T15:15:42	1461338142184	2.8397
2016.9	2016-11-21	2016-11-21T17:00:56	1479747656055	4.19392	4.10772	6.62194	2.5735		2016.68	2016-09-04	2016-09-04T23:24:54	1473031494466	2.8309	2.7518	5.2835	1.04775		2016.6	2016-08-07	2016-08-07T03:14:05	1470539645373	3.80711	3.59205	7.00726	1.93446		2016.15	2016-02-22	2016-02-22T04:26:53	1456115213024	3.39031	3.27883	5.34825	1.95921		2017.05	2017-01-16	2017-01-16T20:17:29	1484597849744	1.40336	1.34024	2.36836	0.741106		2016.2	2016-03-13	2016-03-13T22:28:22	1457908102543	2.8397
2016.8	2016-10-17	2016-10-17T05:20:08	1476681608978	4.19392	4.10772	6.62194	2.5735		2016.58	2016-07-30	2016-07-30T04:38:31	1469853511365	1.74151	1.73035	3.5434	0.581244		2016.5	2016-06-30	2016-06-30T20:55:31	1467320131447	3.58225	3.4872	6.17161	1.64496		2016.04	2016-01-13	2016-01-13T03:21:31	1452655291902	3.39031	3.27883	5.34825	1.95921		2016.95	2016-12-12	2016-12-12T06:39:59	1481524799230	1.44163	1.35437	2.4995	0.766009		2016.1	2016-02-03	2016-02-03T05:41:02	1454478062902	2.8397
2016.7	2016-09-11	2016-09-11T17:39:21	1473615561901	4.19844	4.10852	6.62194	2.58346		2016.48	2016-06-23	2016-06-23T09:52:08	1466675528264	0.914523	0.877262	1.53654	0.495911		2016.4	2016-05-24	2016-05-24T14:36:57	1464100617522	2.54858	2.412	4.59553	1.47436		2015.93	2015-12-04	2015-12-04T02:16:10	1449195370780	3.39031	3.27883	5.34825	1.95921		2016.86	2016-11-07	2016-11-07T17:02:28	1478538148716	1.56713	1.38451	3.99655	0.806024		2015.99	2015-12-25	2015-12-25T12:53:43	1451048023262	2.8397
2016.6	2016-08-07	2016-08-07T05:58:34	1470549514824	4.78021	4.55927	8.15516	2.5703		2016.38	2016-05-17	2016-05-17T15:05:45	1463497545163	0.914523	0.877262	1.53654	0.495911		2016.3	2016-04-17	2016-04-17T08:18:23	1460881103597	2.48843	2.39236	4.02547	1.47436		2015.82	2015-10-25	2015-10-25T01:10:49	1445735449658	3.39031	3.27883	5.34825	1.95921		2016.76	2016-10-04	2016-10-04T03:24:58	1475551498201	2.1286	1.54614	6.18349	0.902829		2015.88	2015-11-15	2015-11-15T20:06:23	1447617983621	2.8397
2016.51	2016-07-02	2016-07-02T18:17:47	1467483467747	3.4597	3.26021	6.20149	1.80542		2016.28	2016-04-10	2016-04-10T20:19:22	1460319562062	0.914523	0.877262	1.53654	0.495911		2016.2	2016-03-11	2016-03-11T01:59:49	1457661589672	2.48843	2.39236	4.02547	1.47436		2015.71	2015-09-15	2015-09-15T00:05:28	1442275528536	3.39031	3.27883	5.34825	1.95921		2016.67	2016-08-30	2016-08-30T13:47:27	1472564847687	4.43029	4.25882	7.83167	2.05398		2015.77	2015-10-07	2015-10-07T03:19:03	1444187943980	2.8397
2016.41	2016-05-28	2016-05-28T06:37:00	1464417420670	3.73191	3.65785	5.73232	2.27055		2016.18	2016-03-05	2016-03-05T01:32:58	1457141578960	0.914523	0.877262	1.53654	0.495911		2016.09	2016-02-02	2016-02-02T19:41:15	1454442075746	2.48843	2.39236	4.02547	1.47436		2015.6	2015-08-05	2015-08-05T23:00:07	1438815607414	3.40318	3.29225	5.3733	1.95921		2016.57	2016-07-27	2016-07-27T00:09:57	1469578197173	4.51647	4.36563	7.83167	2.17273		2015.66	2015-08-28	2015-08-28T10:31:44	1440757904340	2.94428
2016.31	2016-04-22	2016-04-22T18:56:13	1461351373593	3.52262	3.41585	5.58296	2.12002		2016.08	2016-01-28	2016-01-28T06:46:35	1453963595859	0.914523	0.877262	1.53654	0.495911		2015.99	2015-12-27	2015-12-27T13:22:41	1451222561821	2.48843	2.39236	4.02547	1.47436		2015.49	2015-06-26	2015-06-26T21:54:46	1435355686292	3.21102	2.86808	6.63308	1.46082		2016.48	2016-06-22	2016-06-22T10:32:26	1466591546658	3.45518	3.29993	6.29589	1.69779		2015.55	2015-07-19	2015-07-19T17:44:24	1437327864699	2.66541
2016.22	2016-03-18	2016-03-18T07:15:26	1458285326516	3.50923	3.41032	5.48153	2.11269		2015.98	2015-12-22	2015-12-22T12:00:12	1450785612758	0.914523	0.877262	1.53654	0.495911		2015.89	2015-11-20	2015-11-20T07:04:07	1448003047896	2.48843	2.39236	4.02547	1.47436		2015.38	2015-05-17	2015-05-17T20:49:25	1431895765170	2.55996	2.51065	4.70322	0.945207		2016.38	2016-05-18	2016-05-18T20:54:56	1463604896144	3.21272	3.06931	6.14982	1.32243		2015.44	2015-06-10	2015-06-10T00:57:05	1433897825058	1.48178
2016.12	2016-02-11	2016-02-11T19:34:39	1455219279441	3.50923	3.41032	5.48153	2.11269		2015.88	2015-11-15	2015-11-15T17:13:49	1447607629657	0.914523	0.877262	1.53654	0.495911		2015.79	2015-10-14	2015-10-14T00:45:33	1444783533971	2.48843	2.39236	4.02547	1.47436		2015.27	2015-04-07	2015-04-07T19:44:04	1428435844048	1.66463	1.57043	2.98095	0.871713		2016.29	2016-04-14	2016-04-14T07:17:25	1460618245630	2.56951	2.40191	4.81115	1.27953		2015.33	2015-05-01	2015-05-01T08:09:45	1430467785417	1.28289
2016.02	2016-01-07	2016-01-07T07:53:52	1452153232364	3.50923	3.41032	5.48153	2.11269		2015.78	2015-10-09	2015-10-09T22:27:26	1444429646555	0.914523	0.877262	1.53654	0.495911		2015.69	2015-09-06	2015-09-06T18:27:00	1441564020046	2.48843	2.39236	4.02547	1.47436		2015.16	2015-02-26	2015-02-26T18:38:42	1424975922926	1.64922	1.56995	2.90658	0.871713		2016.2	2016-03-10	2016-03-10T17:39:55	1457631595115	2.50822	2.38608	4.42516	1.27953		2015.23	2015-03-22	2015-03-22T15:22:25	1427037745777	1.28289
2015.92	2015-12-02	2015-12-02T20:13:05	1449087185287	3.50923	3.41032	5.48153	2.11269		2015.68	2015-09-03	2015-09-03T03:41:03	1441251663454	1.43427	1.29241	3.18401	0.575748		2015.58	2015-07-31	2015-07-31T12:08:26	1438344506122	5.23228	5.07001	8.70614	2.88039		2015.05	2015-01-17	2015-01-17T17:33:21	1421516001804	1.64922	1.56995	2.90658	0.871713		2016.1	2016-02-05	2016-02-05T04:02:24	1454644944601	2.50132	2.38608	4.40421	1.27953		2015.12	2015-02-10	2015-02-10T22:35:06	1423607706136	1.28289
2015.83	2015-10-28	2015-10-28T08:32:18	1446021138210	3.50923	3.41032	5.48153	2.11269		2015.58	2015-07-28	2015-07-28T08:54:40	1438073680353	1.48307	1.37604	3.15856	0.581616		2015.48	2015-06-24	2015-06-24T05:49:52	1435124992197	2.0816	1.9976	3.57982	0.882087		2014.94	2014-12-08	2014-12-08T16:28:00	1418056080682	1.64922	1.56995	2.90658	0.871713		2016.01	2016-01-01	2016-01-01T14:24:54	1451658294087	2.50132	2.38608	4.40421	1.27953		2015.01	2015-01-02	2015-01-02T05:47:46	1420177666495	1.28289
2015.73	2015-09-22	2015-09-22T20:51:31	1442955091133	3.50923	3.41032	5.48153	2.11269		2015.47	2015-06-21	2015-06-21T14:08:17	1434895697252	0.745464	0.64764	2.53079	0.369215		2015.38	2015-05-17	2015-05-17T23:31:18	1431905478272	1.13245	1.05983	2.00413	0.632319		2014.83	2014-10-29	2014-10-29T15:22:39	1414596159559	1.64922	1.56995	2.90658	0.871713		2015.91	2015-11-28	2015-11-28T00:47:23	1448671643572	2.50132	2.38608	4.40421	1.27953		2014.9	2014-11-23	2014-11-23T13:00:26	1416747626855	1.28289
2015.63	2015-08-18	2015-08-18T09:10:44	1439889044056	3.50923	3.41032	5.48153	2.11269		2015.37	2015-05-15	2015-05-15T19:21:54	1431717714151	0.677332	0.645173	1.15437	0.369215		2015.28	2015-04-10	2015-04-10T17:12:44	1428685964347	1.1018	1.05955	1.86336	0.625393		2014.72	2014-09-19	2014-09-19T14:17:18	1411136238437	1.64922	1.56995	2.90658	0.871713		2015.82	2015-10-24	2015-10-24T11:09:53	1445684993058	2.50132	2.38608	4.40421	1.27953		2014.79	2014-10-14	2014-10-14T20:13:07	1413317587214	1.28289
2015.54	2015-07-13	2015-07-13T21:29:56	1436822996979	3.77127	3.59805	6.45498	1.80382		2015.27	2015-04-09	2015-04-09T00:35:31	1428539731049	0.677332	0.645173	1.15437	0.369215		2015.18	2015-03-04	2015-03-04T10:54:10	1425466450422	1.1018	1.05955	1.86336	0.625393		2014.61	2014-08-10	2014-08-10T13:11:57	1407676317315	1.79292	1.73433	2.88495	1.0322		2015.72	2015-09-19	2015-09-19T21:32:22	1442698342544	2.50132	2.38608	4.40421	1.27953		2014.68	2014-09-05	2014-09-05T03:25:47	1409887547573	1.589
2015.44	2015-06-08	2015-06-08T09:49:09	1433756949902	2.1248	2.01916	3.6031	1.16252		2015.17	2015-03-03	2015-03-03T05:49:07	1425361747948	0.677332	0.645173	1.15437	0.369215		2015.07	2015-01-26	2015-01-26T04:35:36	1422246936496	1.1018	1.05955	1.86336	0.625393		2014.5	2014-07-01	2014-07-01T12:06:36	1404216396193	1.79292	1.73433	2.88495	1.0322		2015.63	2015-08-16	2015-08-16T07:54:52	1439711692029	2.50132	2.38608	4.40421	1.27953		2014.57	2014-07-27	2014-07-27T10:38:27	1406457507933	1.589
2015.34	2015-05-03	2015-05-03T22:08:22	1430690902825	1.72618	1.57497	3.53206	0.926228		2015.07	2015-01-25	2015-01-25T11:02:44	1422183764847	0.677332	0.645173	1.15437	0.369215		2014.97	2014-12-19	2014-12-19T22:17:02	1419027422571	1.1018	1.05955	1.86336	0.625393		2014.39	2014-05-22	2014-05-22T11:01:15	1400756475071	1.79292	1.73433	2.88495	1.0322		2015.53	2015-07-12	2015-07-12T18:17:21	1436725041515	3.13598	2.91265	6.3213	1.2551		2014.46	2014-06-17	2014-06-17T17:51:08	1403027468292	1.589
2015.24	2015-03-29	2015-03-29T10:27:35	1427624855748	1.62241	1.5447	2.63039	0.924221		2014.97	2014-12-19	2014-12-19T16:16:21	1419005781746	0.677332	0.645173	1.15437	0.369215		2014.87	2014-11-12	2014-11-12T15:58:28	1415807908646	1.1018	1.05955	1.86336	0.625393		2014.28	2014-04-12	2014-04-12T09:55:53	1397296553949	1.79292	1.73433	2.88495	1.0322		2015.44	2015-06-08	2015-06-08T04:39:51	1433738391000	1.81972	1.60676	3.69285	0.894513		2014.36	2014-05-09	2014-05-09T01:03:48	1399597428651	1.589
2015.15	2015-02-21	2015-02-21T22:46:48	1424558808671	1.62241	1.5447	2.63039	0.924221		2014.87	2014-11-12	2014-11-12T21:29:58	1415827798645	0.677332	0.645173	1.15437	0.369215		2014.77	2014-10-06	2014-10-06T09:39:54	1412588394721	1.1018	1.05955	1.86336	0.625393		2014.17	2014-03-03	2014-03-03T08:50:32	1393836632827	1.79591	1.73886	2.88495	1.03392		2015.34	2015-05-04	2015-05-04T15:02:20	1430751740490	1.72204	1.59933	3.18345	0.874425		2014.25	2014-03-30	2014-03-30T08:16:29	1396167389011	1.60939
2015.05	2015-01-17	2015-01-17T11:06:01	1421492761594	1.62241	1.5447	2.63039	0.924221		2014.77	2014-10-07	2014-10-07T02:43:35	1412649815543	0.684123	0.64793	1.16502	0.369802		2014.66	2014-08-30	2014-08-30T03:21:20	1409368880795	1.54329	1.48583	2.45742	0.922666		2014.06	2014-01-22	2014-01-22T07:45:11	1390376711705	3.59093	2.60537	8.81932	1.27222		2015.25	2015-03-31	2015-03-31T01:24:49	1427765089976	1.6103	1.53413	2.62648	0.874425		2014.14	2014-02-18	2014-02-18T15:29:09	1392737349370	3.21356
2014.95	2014-12-12	2014-12-12T23:25:14	1418426714518	1.62241	1.5447	2.63039	0.924221		2014.67	2014-08-31	2014-08-31T07:57:12	1409471832442	0.703317	0.675087	1.25121	0.339808		2014.56	2014-07-23	2014-07-23T21:02:46	1406149366870	1.54329	1.48583	2.45742	0.922666		2013.95	2013-12-13	2013-12-13T06:39:50	1386916790583	5.04681	4.97999	9.51262	1.67809		2015.15	2015-02-24	2015-02-24T11:47:19	1424778439461	1.60297	1.53222	2.60189	0.874425		2014.03	2014-01-09	2014-01-09T22:41:49	1389307309729	4.66712
2014.85	2014-11-07	2014-11-07T11:44:27	1415360667441	1.62241	1.5447	2.63039	0.924221		2014.57	2014-07-25	2014-07-25T13:10:49	1406293849341	0.790066	0.72555	1.62848	0.39683		2014.46	2014-06-16	2014-06-16T14:44:12	1402929852945	1.54329	1.48583	2.45742	0.922666		2013.84	2013-11-03	2013-11-03T05:34:29	1383456869461	5.46972	5.31882	9.53631	2.49423		2015.06	2015-01-20	2015-01-20T22:09:48	1421791788947	1.60297	1.53222	2.60189	0.874425		2013.92	2013-12-01	2013-12-01T05:54:30	1385877270088	4.7261
2014.76	2014-10-03	2014-10-03T00:03:40	1412294620364	1.62241	1.5447	2.63039	0.924221		2014.47	2014-06-18	2014-06-18T18:24:26	1403115866240	1.09286	0.949604	2.45239	0.497662		2014.36	2014-05-10	2014-05-10T08:25:39	1399710339020	1.54329	1.48583	2.45742	0.922666		2013.73	2013-09-24	2013-09-24T04:29:08	1379996948339	5.49443	5.32803	9.53631	2.53601		2014.96	2014-12-17	2014-12-17T08:32:18	1418805138433	1.60297	1.53222	2.60189	0.874425		2013.81	2013-10-22	2013-10-22T13:07:10	1382447230448	4.73035
2014.66	2014-08-28	2014-08-28T12:22:53	1409228573287	1.61627	1.5447	2.63039	0.852835		2014.37	2014-05-12	2014-05-12T23:38:03	1399937883138	1.25215	1.15815	2.57749	0.529464		2014.26	2014-04-03	2014-04-03T02:07:05	1396490825095	1.55653	1.4878	2.48954	0.923247		2013.62	2013-08-15	2013-08-15T03:23:47	1376537027217	2.19618	2.2697	4.36226	0.562903		2014.87	2014-11-12	2014-11-12T18:54:47	1415818487918	1.60297	1.53222	2.60189	0.874425		2013.7	2013-09-12	2013-09-12T20:19:50	1379017190807	3.11781
2014.56	2014-07-24	2014-07-24T00:42:06	1406162526210	1.22879	1.18262	2.07683	0.611458		2014.27	2014-04-06	2014-04-06T04:51:40	1396759900037	1.2754	1.19841	2.6141	0.519573		2014.15	2014-02-24	2014-02-24T19:48:31	1393271311169	3.71567	1.84854	11.156	0.976446		2013.51	2013-07-06	2013-07-06T02:18:26	1373077106095	0.980715	0.9271	1.69355	0.516825		2014.77	2014-10-09	2014-10-09T05:17:17	1412831837404	1.60297	1.53222	2.60189	0.874425		2013.59	2013-08-04	2013-08-04T03:32:31	1375587151166	1.54758
2014.47	2014-06-18	2014-06-18T13:01:19	1403096479133	1.23208	1.18295	2.08132	0.619032		2014.16	2014-02-28	2014-02-28T10:05:16	1393581916936	1.27762	1.19926	2.62966	0.519573		2014.05	2014-01-18	2014-01-18T13:29:57	1390051797244	7.05089	7.15573	12.5021	1.41185		2013.4	2013-05-27	2013-05-27T01:13:04	1369617184973	0.976026	0.9271	1.68905	0.516825		2014.68	2014-09-04	2014-09-04T15:39:46	1409845186890	1.60297	1.53222	2.60189	0.874425		2013.48	2013-06-25	2013-06-25T10:45:11	1372157111526	1.48982
2014.37	2014-05-14	2014-05-14T01:20:32	1400030432056	1.33989	1.21032	3.00418	0.689119		2014.06	2014-01-22	2014-01-22T15:18:53	1390403933835	1.27838	1.2006	2.62966	0.519573		2013.95	2013-12-12	2013-12-12T07:11:23	1386832283319	7.61038	7.37683	12.6767	3.66321		2013.29	2013-04-17	2013-04-17T00:07:43	1366157263851	0.976026	0.9271	1.68905	0.516825		2014.59	2014-08-01	2014-08-01T02:02:16	1406858536375	0.811253	0.767164	1.47334	0.373679		2013.38	2013-05-16	2013-05-16T17:57:51	1368727071885	1.48982
2014.27	2014-04-08	2014-04-08T13:39:44	1396964384979	1.49725	1.26129	4.36576	0.735654		2013.96	2013-12-16	2013-12-16T20:32:30	1387225950734	1.27838	1.2006	2.62966	0.519573		2013.85	2013-11-05	2013-11-05T00:52:49	1383612769394	7.74358	7.44944	12.7534	4.35196		2013.18	2013-03-07	2013-03-07T23:02:22	1362697342734	0.976026	0.9271	1.68905	0.516825		2014.49	2014-06-27	2014-06-27T12:24:45	1403871885861	0.829635	0.773629	1.5504	0.39792		2013.27	2013-04-07	2013-04-07T01:10:32	1365297032244	1.48982
2014.17	2014-03-04	2014-03-04T01:58:57	1393898337902	1.64608	1.3014	4.81468	0.758661		2013.86	2013-11-10	2013-11-10T01:46:07	1384047967632	1.27838	1.2006	2.62966	0.519573		2013.75	2013-09-28	2013-09-28T18:34:15	1380393255469	7.74358	7.44944	12.7534	4.35196		2013.08	2013-01-26	2013-01-26T21:57:01	1359237421612	0.976026	0.9271	1.68905	0.516825		2014.4	2014-05-23	2014-05-23T22:47:15	1400885235347	1.27704	0.924163	3.96011	0.475922		2013.16	2013-02-26	2013-02-26T08:23:12	1361866992604	1.48982
2014.08	2014-01-27	2014-01-27T14:18:10	1390832290825	1.91923	1.40972	5.60468	0.787474		2013.76	2013-10-04	2013-10-04T06:59:44	1380869984531	1.26339	1.12247	2.69946	0.49214		2013.64	2013-08-22	2013-08-22T12:15:41	1377173741543	2.56676	2.6392	4.69214	0.6366		2012.97	2012-12-16	2012-12-16T20:51:40	1355691100490	0.976026	0.9271	1.68905	0.516825		2014.3	2014-04-19	2014-04-19T09:09:44	1397898584832	1.94082	1.61891	4.84576	0.609524		2013.05	2013-01-17	2013-01-17T15:35:52	1358436952963	1.48982
2013.98	2013-12-23	2013-12-23T02:37:23	1387766243748	3.21902	3.04089	6.75061	1.05549		2013.66	2013-08-28	2013-08-28T12:13:21	1377692001430	0.632674	0.593402	1.11803	0.309135		2013.54	2013-07-16	2013-07-16T05:57:07	1373954227618	1.10184	1.04324	1.89134	0.597105		2012.86	2012-11-06	2012-11-06T19:46:19	1352231179367	0.976026	0.9271	1.68905	0.516825		2014.21	2014-03-15	2014-03-15T19:32:14	1394911934318	2.45954	2.35945	5.24521	0.72978		2012.94	2012-12-07	2012-12-07T22:48:33	1354920513322	1.48982
2013.88	2013-11-17	2013-11-17T14:56:36	1384700196672	3.56497	3.37475	6.7979	1.41991		2013.56	2013-07-22	2013-07-22T17:26:58	1374514018329	0.629193	0.593154	1.11708	0.309135		2013.44	2013-06-08	2013-06-08T23:38:33	1370734713693	1.10184	1.04324	1.89134	0.597105		2012.75	2012-09-27	2012-09-27T18:40:58	1348771258245	0.976026	0.9271	1.68905	0.516825		2014.11	2014-02-09	2014-02-09T05:54:43	1391925283804	2.71676	2.55934	5.47842	0.870914		2012.83	2012-10-29	2012-10-29T06:01:13	1351490473682	1.48982
2013.79	2013-10-13	2013-10-13T03:15:49	1381634149595	3.62249	3.42318	6.81328	1.58782		2013.46	2013-06-15	2013-06-15T22:40:35	1371336035227	0.629193	0.593154	1.11708	0.309135		2013.34	2013-05-02	2013-05-02T17:19:59	1367515199768	1.10184	1.04324	1.89134	0.597105		2012.64	2012-08-18	2012-08-18T17:35:37	1345311337123	0.976026	0.9271	1.68905	0.516825		2014.02	2014-01-05	2014-01-05T16:17:13	1388938633289	2.80355	2.61507	5.59465	1.09744		2012.72	2012-09-19	2012-09-19T13:13:54	1348060434041	1.48982
2013.69	2013-09-07	2013-09-07T15:35:02	1378568102518	3.6486	3.43582	6.81328	1.82898		2013.36	2013-05-10	2013-05-10T03:54:12	1368158052126	0.629193	0.593154	1.11708	0.309135		2013.24	2013-03-26	2013-03-26T11:01:25	1364295685842	1.10184	1.04324	1.89134	0.597105		2012.53	2012-07-09	2012-07-09T16:30:16	1341851416002	0.976026	0.9271	1.68905	0.516825		2013.92	2013-12-02	2013-12-02T02:39:42	1385951982775	2.84226	2.63391	5.59465	1.26158		2012.61	2012-08-10	2012-08-10T20:26:34	1344630394400	1.48982
2013.59	2013-08-03	2013-08-03T03:54:15	1375502055441	1.27763	0.910062	3.49629	0.496683		2013.26	2013-04-03	2013-04-03T09:07:49	1364980069025	0.629193	0.593154	1.11708	0.309135		2013.13	2013-02-17	2013-02-17T04:42:51	1361076171917	1.10184	1.04324	1.89134	0.597105		2012.42	2012-05-30	2012-05-30T15:24:54	1338391494880	0.976026	0.9271	1.68905	0.516825		2013.83	2013-10-28	2013-10-28T13:02:12	1382965332261	2.85262	2.64668	5.59465	1.30326		2012.51	2012-07-02	2012-07-02T03:39:14	1341200354759	1.48982
2013.49	2013-06-28	2013-06-28T16:13:28	1372436008364	0.866761	0.836618	1.3885	0.48667		2013.16	2013-02-25	2013-02-25T14:21:25	1361802085924	0.629193	0.593154	1.11708	0.309135		2013.03	2013-01-10	2013-01-10T22:24:17	1357856657992	1.10184	1.04324	1.89134	0.597105		2012.31	2012-04-20	2012-04-20T14:19:33	1334931573758	0.976601	0.9271	1.68905	0.519444		2013.73	2013-09-23	2013-09-23T23:24:41	1379978681746	2.85262	2.64668	5.59465	1.30326		2012.4	2012-05-23	2012-05-23T10:51:55	1337770315119	1.48982
2013.4	2013-05-24	2013-05-24T04:32:41	1369369961287	0.866761	0.836618	1.3885	0.48667		2013.06	2013-01-19	2013-01-19T19:35:02	1358624102823	0.629193	0.593154	1.11708	0.309135		2012.93	2012-12-03	2012-12-03T16:05:44	1354550744067	1.10184	1.04324	1.89134	0.597105		2012.2	2012-03-11	2012-03-11T13:14:12	1331471652636	0.976747	0.927412	1.68905	0.519444		2013.64	2013-08-20	2013-08-20T09:47:11	1376992031232	2.10459	1.97104	4.04235	0.673739		2012.29	2012-04-13	2012-04-13T18:04:35	1334340275478	1.48982
2013.3	2013-04-18	2013-04-18T16:51:54	1366303914210	0.866761	0.836618	1.3885	0.48667		2012.96	2012-12-13	2012-12-13T00:48:39	1355359719721	0.629397	0.593154	1.11708	0.309135		2012.83	2012-10-27	2012-10-27T09:47:10	1351331230142	1.10201	1.04324	1.89134	0.597105		2012.09	2012-01-31	2012-01-31T12:08:51	1328011731514	0.977389	0.927412	1.68905	0.519856		2013.54	2013-07-16	2013-07-16T20:09:40	1374005380717	0.786101	0.736496	1.42846	0.381541		2012.18	2012-03-05	2012-03-05T01:17:15	1330910235837	1.49031
2013.2	2013-03-14	2013-03-14T05:11:07	1363237867133	0.867716	0.836731	1.3885	0.493596		2012.85	2012-11-06	2012-11-06T06:02:16	1352181736620	0.629327	0.593154	1.11708	0.309135		2012.73	2012-09-20	2012-09-20T03:28:36	1348111716216	1.10269	1.04388	1.89134	0.59964		2011.98	2011-12-22	2011-12-22T11:03:30	1324551810392	0.979032	0.928881	1.68905	0.519856		2013.45	2013-06-12	2013-06-12T06:32:10	1371018730203	0.77434	0.736496	1.38252	0.381541		2012.07	2012-01-25	2012-01-25T08:29:56	1327480196197	1.49245
[truncated: 19 more columns]

## Sheet: BYAM
	Bayesian Skyline: BYAM_HA_date_1.log									Bayesian Skyline: BYAM_MP_date_1.log									Bayesian Skyline: BYAM_NA_date_1.log									Bayesian Skyline: BYAM_NP_date_1.log									Bayesian Skyline: BYAM_NS_date_2.log									Bayesian Skyline: BYAM_PA_date_1.log
time	date	datetime	milliseconds	mean	median	upper	lower		time	date	datetime	milliseconds	mean	median	upper	lower		time	date	datetime	milliseconds	mean	median	upper	lower		time	date	datetime	milliseconds	mean	median	upper	lower		time	date	datetime	milliseconds	mean	median	upper	lower		time	date	datetime	milliseconds	mean
2018.82	2018-10-25	2018-10-25T18:12:00	1540491120257	2.61276	2.32876	5.25252	1.15905		2018.82	2018-10-25	2018-10-25T18:12:00	1540491120125	1.59383	1.49306	3.18907	0.730687		2018.82	2018-10-25	2018-10-25T18:12:00	1540491120437	5.07635	4.63849	11.4527	1.77474		2018.82	2018-10-25	2018-10-25T18:12:00	1540491120971	2.71437	2.48013	6.04897	1.05303		2018.82	2018-10-25	2018-10-25T18:12:00	1540491120448	2.85042	2.5532	6.30772	1.21		2018.82	2018-10-25	2018-10-25T18:12:00	1540491120463	1.72667
2018.74	2018-09-25	2018-09-25T02:40:55	1537843255772	2.61276	2.32876	5.25252	1.15905		2018.74	2018-09-26	2018-09-26T04:53:18	1537937598874	1.59383	1.49306	3.18907	0.730687		2018.73	2018-09-24	2018-09-24T10:18:39	1537784319331	5.07635	4.63849	11.4527	1.77474		2018.74	2018-09-25	2018-09-25T14:04:07	1537884247132	2.71437	2.48013	6.04897	1.05303		2018.74	2018-09-28	2018-09-28T00:49:57	1538095797799	2.85042	2.5532	6.30772	1.21		2018.71	2018-09-14	2018-09-14T12:00:08	1536926408806	1.72667
2018.65	2018-08-25	2018-08-25T11:09:51	1535195391287	2.61276	2.32876	5.25252	1.15905		2018.66	2018-08-27	2018-08-27T15:34:37	1535384077622	1.59383	1.49306	3.18907	0.730687		2018.65	2018-08-24	2018-08-24T02:25:18	1535077518225	5.07635	4.63849	11.4527	1.77474		2018.65	2018-08-26	2018-08-26T09:56:13	1535277373292	2.71437	2.48013	6.04897	1.05303		2018.67	2018-08-31	2018-08-31T07:27:55	1535700475149	2.85042	2.5532	6.30772	1.21		2018.59	2018-08-04	2018-08-04T05:48:17	1533361697148	1.72667
2018.57	2018-07-25	2018-07-25T19:38:46	1532547526802	2.61276	2.32876	5.25252	1.15905		2018.58	2018-07-29	2018-07-29T02:15:56	1532830556370	1.59383	1.49306	3.18907	0.730687		2018.56	2018-07-23	2018-07-23T18:31:57	1532370717119	5.07635	4.63849	11.4527	1.77474		2018.57	2018-07-27	2018-07-27T05:48:19	1532670499452	2.71437	2.48013	6.04897	1.05303		2018.59	2018-08-03	2018-08-03T14:05:52	1533305152499	2.85042	2.5532	6.30772	1.21		2018.48	2018-06-23	2018-06-23T23:36:25	1529796985491	1.72667
2018.48	2018-06-25	2018-06-25T04:07:42	1529899662317	2.61276	2.32876	5.25252	1.15905		2018.5	2018-06-29	2018-06-29T12:57:15	1530277035118	1.59383	1.49306	3.18907	0.730687		2018.48	2018-06-22	2018-06-22T10:38:36	1529663916013	5.07635	4.63849	11.4527	1.77474		2018.49	2018-06-27	2018-06-27T01:40:25	1530063625613	2.71437	2.48013	6.04897	1.05303		2018.52	2018-07-06	2018-07-06T20:43:49	1530909829849	2.85042	2.5532	6.30772	1.21		2018.37	2018-05-13	2018-05-13T17:24:33	1526232273833	1.72667
2018.4	2018-05-25	2018-05-25T12:36:37	1527251797832	2.61276	2.32876	5.25252	1.15905		2018.42	2018-05-30	2018-05-30T23:38:33	1527723513866	1.59383	1.49306	3.18907	0.730687		2018.39	2018-05-22	2018-05-22T02:45:14	1526957114907	5.07635	4.63849	11.4527	1.77474		2018.41	2018-05-27	2018-05-27T21:32:31	1527456751773	2.71437	2.48013	6.04897	1.05303		2018.44	2018-06-09	2018-06-09T03:21:47	1528514507199	2.85042	2.5532	6.30772	1.21		2018.25	2018-04-02	2018-04-02T11:12:42	1522667562176	1.72667
2018.32	2018-04-24	2018-04-24T21:05:33	1524603933347	2.61276	2.32876	5.25252	1.15905		2018.33	2018-05-01	2018-05-01T10:19:52	1525169992614	1.59383	1.49306	3.18907	0.730687		2018.31	2018-04-20	2018-04-20T18:51:53	1524250313801	5.07635	4.63849	11.4527	1.77474		2018.32	2018-04-27	2018-04-27T17:24:37	1524849877933	2.71437	2.48013	6.04897	1.05303		2018.36	2018-05-12	2018-05-12T09:59:44	1526119184550	2.85042	2.5532	6.30772	1.21		2018.14	2018-02-20	2018-02-20T05:00:50	1519102850518	1.72667
2018.23	2018-03-25	2018-03-25T05:34:28	1521956068862	2.61276	2.32876	5.25252	1.15905		2018.25	2018-04-01	2018-04-01T21:01:11	1522616471363	1.59383	1.49306	3.18907	0.730687		2018.22	2018-03-20	2018-03-20T10:58:32	1521543512695	5.07635	4.63849	11.4527	1.77474		2018.24	2018-03-28	2018-03-28T13:16:44	1522243004094	2.71437	2.48013	6.04897	1.05303		2018.29	2018-04-14	2018-04-14T16:37:41	1523723861900	2.85042	2.5532	6.30772	1.21		2018.03	2018-01-09	2018-01-09T22:48:58	1515538138861	1.72667
2018.15	2018-02-22	2018-02-22T14:03:24	1519308204377	2.61276	2.32876	5.25252	1.15905		2018.17	2018-03-03	2018-03-03T07:42:30	1520062950111	1.59383	1.49306	3.18907	0.730687		2018.13	2018-02-17	2018-02-17T03:05:11	1518836711589	5.07635	4.63849	11.4527	1.77474		2018.16	2018-02-26	2018-02-26T09:08:50	1519636130254	2.71437	2.48013	6.04897	1.05303		2018.21	2018-03-17	2018-03-17T23:15:39	1521328539250	2.85042	2.5532	6.30772	1.21		2017.92	2017-11-29	2017-11-29T16:37:07	1511973427203	1.72667
2018.06	2018-01-22	2018-01-22T22:32:19	1516660339892	2.61276	2.32876	5.25252	1.15905		2018.09	2018-02-01	2018-02-01T18:23:48	1517509428860	1.59383	1.49306	3.18907	0.730687		2018.05	2018-01-16	2018-01-16T19:11:50	1516129910483	5.07635	4.63849	11.4527	1.77474		2018.08	2018-01-27	2018-01-27T05:00:56	1517029256414	2.71437	2.48013	6.04897	1.05303		2018.14	2018-02-18	2018-02-18T05:53:36	1518933216600	2.85042	2.5532	6.30772	1.21		2017.8	2017-10-19	2017-10-19T10:25:15	1508408715546	1.72667
2017.98	2017-12-23	2017-12-23T07:01:15	1514012475407	2.61276	2.32876	5.25252	1.15905		2018.01	2018-01-03	2018-01-03T05:05:07	1514955907608	1.59383	1.49306	3.18907	0.730687		2017.96	2017-12-16	2017-12-16T11:18:29	1513423109377	5.07635	4.63849	11.4527	1.77474		2017.99	2017-12-28	2017-12-28T00:53:02	1514422382575	2.71437	2.48013	6.04897	1.05303		2018.06	2018-01-21	2018-01-21T12:31:33	1516537893950	2.85042	2.5532	6.30772	1.21		2017.69	2017-09-08	2017-09-08T04:13:23	1504844003888	1.72667
2017.9	2017-11-22	2017-11-22T15:30:10	1511364610922	2.61276	2.32876	5.25252	1.15905		2017.93	2017-12-04	2017-12-04T15:46:26	1512402386356	1.59383	1.49306	3.18907	0.730687		2017.88	2017-11-15	2017-11-15T03:25:08	1510716308271	5.07635	4.63849	11.4527	1.77474		2017.91	2017-11-27	2017-11-27T20:45:08	1511815508735	2.71437	2.48013	6.04897	1.05303		2017.98	2017-12-24	2017-12-24T19:09:31	1514142571301	2.85042	2.5532	6.30772	1.21		2017.58	2017-07-28	2017-07-28T22:01:32	1501279292231	4.31831
2017.81	2017-10-22	2017-10-22T23:59:06	1508716746436	2.61276	2.32876	5.25252	1.15905		2017.85	2017-11-05	2017-11-05T02:27:45	1509848865104	1.59383	1.49306	3.18907	0.730687		2017.79	2017-10-14	2017-10-14T19:31:47	1508009507165	5.07635	4.63849	11.4527	1.77474		2017.83	2017-10-28	2017-10-28T16:37:14	1509208634895	2.71437	2.48013	6.04897	1.05303		2017.91	2017-11-27	2017-11-27T01:47:28	1511747248651	2.85042	2.5532	6.30772	1.21		2017.46	2017-06-17	2017-06-17T15:49:40	1497714580574	5.32103
2017.73	2017-09-22	2017-09-22T08:28:01	1506068881966	2.61276	2.32876	5.25252	1.15905		2017.77	2017-10-06	2017-10-06T13:09:03	1507295343852	1.59383	1.49306	3.18907	0.730687		2017.7	2017-09-13	2017-09-13T11:38:26	1505302706059	5.07635	4.63849	11.4527	1.77474		2017.75	2017-09-28	2017-09-28T12:29:21	1506601761056	2.71437	2.48013	6.04897	1.05303		2017.83	2017-10-30	2017-10-30T08:25:26	1509351926001	2.85042	2.5532	6.30772	1.21		2017.35	2017-05-07	2017-05-07T09:37:48	1494149868916	2.06854
2017.64	2017-08-22	2017-08-22T16:56:57	1503421017481	2.61276	2.32876	5.25252	1.15905		2017.69	2017-09-06	2017-09-06T23:50:22	1504741822600	1.59383	1.49306	3.18907	0.730687		2017.62	2017-08-13	2017-08-13T03:45:04	1502595904953	5.07635	4.63849	11.4527	1.77474		2017.66	2017-08-29	2017-08-29T08:21:27	1503994887216	2.71437	2.48013	6.04897	1.05303		2017.76	2017-10-02	2017-10-02T15:03:23	1506956603351	2.85042	2.5532	6.30772	1.21		2017.24	2017-03-27	2017-03-27T03:25:57	1490585157259	3.7849
2017.56	2017-07-23	2017-07-23T01:25:52	1500773152996	4.25191	3.97297	8.29281	1.99251		2017.61	2017-08-08	2017-08-08T10:31:41	1502188301348	1.67896	1.55149	3.58373	0.765851		2017.53	2017-07-12	2017-07-12T19:51:43	1499889103847	8.90533	7.87941	20.2794	3.46397		2017.58	2017-07-30	2017-07-30T04:13:33	1501388013376	3.09123	2.74607	7.10094	1.29436		2017.68	2017-09-04	2017-09-04T21:41:20	1504561280701	2.85042	2.5532	6.30772	1.21		2017.12	2017-02-13	2017-02-13T21:14:05	1487020445601	3.78864
2017.48	2017-06-22	2017-06-22T09:54:48	1498125288511	3.6743	3.37154	8.137	1.30492		2017.52	2017-07-09	2017-07-09T21:13:00	1499634780096	4.6105	4.2151	9.55841	1.69127		2017.45	2017-06-11	2017-06-11T11:58:22	1497182302741	9.67197	8.65237	22.0595	3.15962		2017.5	2017-06-30	2017-06-30T00:05:39	1498781139537	4.50866	3.88409	11.2978	1.46109		2017.6	2017-08-08	2017-08-08T04:19:18	1502165958052	2.86308	2.56051	6.39158	1.22486		2017.01	2017-01-03	2017-01-03T15:02:13	1483455733944	3.75512
2017.39	2017-05-22	2017-05-22T18:23:44	1495477424026	3.31969	3.07379	6.44955	1.5036		2017.44	2017-06-10	2017-06-10T07:54:18	1497081258846	4.07299	3.54781	9.74875	1.24925		2017.36	2017-05-11	2017-05-11T04:05:01	1494475501635	5.47308	4.83495	13.2408	1.82591		2017.41	2017-05-30	2017-05-30T19:57:45	1496174265697	4.93012	4.48773	11.1017	1.71925		2017.53	2017-07-11	2017-07-11T10:57:15	1499770635402	4.7609	4.12669	11.7045	1.55615		2016.9	2016-11-22	2016-11-22T08:50:22	1479804622286	3.31896
2017.31	2017-04-22	2017-04-22T02:52:39	1492829559541	4.38317	4.1405	8.0951	1.97213		2017.36	2017-05-11	2017-05-11T18:35:37	1494527737595	3.26222	2.8608	7.99677	1.01453		2017.28	2017-04-09	2017-04-09T20:11:40	1491768700528	4.76128	4.30455	10.1764	1.91577		2017.33	2017-04-30	2017-04-30T15:49:51	1493567391857	3.68988	3.20071	9.18582	1.12721		2017.45	2017-06-13	2017-06-13T17:35:12	1497375312752	5.53901	4.86133	13.1043	1.63968		2016.79	2016-10-12	2016-10-12T02:38:30	1476239910630	2.45065
2017.22	2017-03-22	2017-03-22T11:21:35	1490181695056	5.18634	4.95137	8.85531	2.83406		2017.28	2017-04-12	2017-04-12T05:16:56	1491974216343	3.66264	3.39268	7.84173	1.37861		2017.19	2017-03-09	2017-03-09T12:18:19	1489061899422	4.26773	4.00112	7.99291	1.91883		2017.25	2017-03-31	2017-03-31T11:41:58	1490960518018	3.24268	2.83702	7.54662	1.31918		2017.38	2017-05-17	2017-05-17T00:13:10	1494979990102	3.78302	3.10506	10.58	0.918043		2016.67	2016-08-31	2016-08-31T20:26:38	1472675198972	1.78987
2017.14	2017-02-19	2017-02-19T19:50:30	1487533830571	5.16197	4.92015	8.85531	2.8132		2017.2	2017-03-13	2017-03-13T15:58:15	1489420695091	3.47867	3.24684	7.11646	1.43421		2017.1	2017-02-06	2017-02-06T04:24:58	1486355098316	3.98011	3.75667	7.65489	2.00844		2017.17	2017-03-01	2017-03-01T07:34:04	1488353644178	2.8367	2.55756	6.10837	1.14385		2017.3	2017-04-19	2017-04-19T06:51:07	1492584667452	3.76244	3.25253	9.01816	1.24844		2016.56	2016-07-21	2016-07-21T14:14:47	1469110487315	1.72565
2017.06	2017-01-20	2017-01-20T04:19:26	1484885966086	5.15652	4.90898	8.83212	2.83406		2017.12	2017-02-12	2017-02-12T02:39:33	1486867173839	3.20058	2.8709	6.70143	1.2625		2017.02	2017-01-05	2017-01-05T20:31:37	1483648297211	4.06428	3.88244	7.43855	2.16159		2017.08	2017-01-30	2017-01-30T03:26:10	1485746770338	2.5417	2.34711	5.20107	1.11067		2017.22	2017-03-22	2017-03-22T13:29:04	1490189344803	3.5765	3.17073	8.26963	1.24161		2016.45	2016-06-10	2016-06-10T08:02:55	1465545775657	1.72919
2016.97	2016-12-19	2016-12-19T12:48:21	1482151701601	5.10068	4.85999	8.83212	2.63283		2017.04	2017-01-13	2017-01-13T13:20:52	1484313652588	2.67186	2.32522	6.12794	1.18642		2016.93	2016-12-04	2016-12-04T12:38:16	1480855096105	3.92014	3.72191	7.02365	2.00901		2017	2016-12-30	2016-12-30T23:18:16	1483139896499	2.42405	2.2959	4.85732	0.65447		2017.15	2017-02-22	2017-02-22T20:07:02	1487794022153	3.3453	2.97305	7.59298	1.26195		2016.33	2016-04-30	2016-04-30T01:51:04	1461981064000	1.71666
2016.89	2016-11-18	2016-11-18T21:17:17	1479503837116	4.66667	4.36171	8.80404	2.10093		2016.96	2016-12-14	2016-12-14T00:02:11	1481673731336	2.39505	2.24917	4.57032	1.18596		2016.85	2016-11-03	2016-11-03T04:44:54	1478148294999	3.67272	3.48597	6.68181	1.93695		2016.92	2016-11-29	2016-11-29T19:10:22	1480446622659	2.25322	2.24489	4.85732	0.479264		2017.07	2017-01-26	2017-01-26T02:44:59	1485398699503	3.19068	2.91023	6.97882	1.08953		2016.22	2016-03-19	2016-03-19T19:39:12	1458416352342	1.66368
2016.8	2016-10-19	2016-10-19T05:46:12	1476855972630	3.97586	3.57161	8.1414	1.94317		2016.88	2016-11-14	2016-11-14T10:43:30	1479120210084	2.35834	2.23424	4.39219	1.18596		2016.76	2016-10-02	2016-10-02T20:51:33	1475441493893	3.60117	3.43197	6.18015	1.93695		2016.84	2016-10-30	2016-10-30T15:02:28	1477839748819	1.90246	1.59693	4.81551	0.455302		2017	2016-12-28	2016-12-28T09:22:56	1482916976853	2.99726	2.69649	6.71851	0.970228		2016.11	2016-02-07	2016-02-07T13:27:20	1454851640685	1.58808
2016.72	2016-09-18	2016-09-18T14:15:08	1474208108145	3.59692	3.3328	7.00392	1.94317		2016.8	2016-10-15	2016-10-15T21:24:48	1476566688832	2.35834	2.23424	4.39219	1.18596		2016.67	2016-09-01	2016-09-01T12:58:12	1472734692787	3.59322	3.42305	6.15629	1.93695		2016.75	2016-09-30	2016-09-30T10:54:34	1475232874980	1.47249	0.957034	4.67255	0.440417		2016.92	2016-11-30	2016-11-30T16:00:54	1480521654203	2.74347	2.38138	6.45939	0.928007		2015.99	2015-12-28	2015-12-28T07:15:29	1451286929028	1.53151
2016.64	2016-08-18	2016-08-18T22:44:03	1471560243660	3.46727	3.29082	5.98325	1.94317		2016.71	2016-09-16	2016-09-16T08:06:07	1474013167581	2.35641	2.23379	4.39219	1.18547		2016.59	2016-08-01	2016-08-01T05:04:51	1470027891681	3.59322	3.42305	6.15629	1.93695		2016.67	2016-08-31	2016-08-31T06:46:41	1472626001140	1.04514	0.867766	3.34349	0.433559		2016.85	2016-11-02	2016-11-02T22:38:51	1478126331553	2.50915	2.18718	5.98428	0.913315		2015.88	2015-11-17	2015-11-17T01:03:37	1447722217370	1.50715
2016.55	2016-07-19	2016-07-19T07:12:59	1468912379175	3.45399	3.28693	5.90609	1.94317		2016.63	2016-08-17	2016-08-17T18:47:26	1471459646329	2.31005	2.19962	4.39219	0.895811		2016.5	2016-06-30	2016-06-30T21:11:30	1467321090574	3.59322	3.42305	6.15629	1.93695		2016.59	2016-08-01	2016-08-01T02:38:47	1470019127300	0.932776	0.862016	1.80277	0.433559		2016.77	2016-10-06	2016-10-06T05:16:48	1475731008904	2.38094	2.12072	5.43627	0.913315		2015.77	2015-10-06	2015-10-06T18:51:45	1444157505713	1.5041
2016.47	2016-06-18	2016-06-18T15:41:54	1466264514690	3.45399	3.28693	5.90609	1.94317		2016.55	2016-07-19	2016-07-19T05:28:45	1468906125077	1.94781	1.77631	4.30574	0.667149		2016.42	2016-05-30	2016-05-30T13:18:09	1464614289468	3.58762	3.42004	6.15629	1.89342		2016.51	2016-07-01	2016-07-01T22:30:53	1467412253461	0.930048	0.862669	1.80059	0.433559		2016.69	2016-09-08	2016-09-08T11:54:46	1473335686254	2.31899	2.10706	5.02064	0.915385		2015.65	2015-08-26	2015-08-26T12:39:54	1440592794055	1.5041
2016.39	2016-05-19	2016-05-19T00:10:50	1463616650205	3.45794	3.29082	5.90609	1.96523		2016.47	2016-06-19	2016-06-19T16:10:03	1466352603825	1.6061	1.35848	3.96168	0.638166		2016.33	2016-04-29	2016-04-29T05:24:48	1461907488362	3.56135	3.42305	6.15629	1.77336		2016.42	2016-06-01	2016-06-01T18:22:59	1464805379621	0.934071	0.863734	1.80277	0.432499		2016.62	2016-08-11	2016-08-11T18:32:43	1470940363604	2.27576	2.10031	4.75041	0.814286		2015.54	2015-07-16	2015-07-16T06:28:02	1437028082398	1.53832
2016.3	2016-04-18	2016-04-18T08:39:45	1460968785720	3.49322	3.32953	5.90609	2.01147		2016.39	2016-05-21	2016-05-21T02:51:22	1463799082573	1.45553	1.28815	3.37431	0.638166		2016.25	2016-03-28	2016-03-28T21:31:27	1459200687256	3.33057	3.25985	6.1293	1.37905		2016.34	2016-05-02	2016-05-02T14:15:05	1462198505781	0.925526	0.859615	1.80277	0.386971		2016.54	2016-07-15	2016-07-15T01:10:40	1468545040954	2.16359	2.03362	4.67862	0.613569		2015.43	2015-06-05	2015-06-05T00:16:10	1433463370740	3.64829
2016.22	2016-03-18	2016-03-18T17:08:41	1458320921235	3.4994	3.35369	6.06567	1.63136		2016.31	2016-04-21	2016-04-21T13:32:41	1461245561321	1.41986	1.28254	2.94143	0.638166		2016.16	2016-02-26	2016-02-26T13:38:06	1456493886150	2.90182	2.6116	5.83249	1.23269		2016.26	2016-04-02	2016-04-02T10:07:11	1459591631941	0.910756	0.829916	2.04102	0.285372		2016.47	2016-06-17	2016-06-17T07:48:38	1466149718304	1.96847	1.74891	4.63604	0.566133		2015.32	2015-04-24	2015-04-24T18:04:19	1429898659083	3.45816
2016.13	2016-02-17	2016-02-17T01:37:36	1455673056750	3.29716	3.1016	6.23139	1.57402		2016.23	2016-03-23	2016-03-23T00:14:00	1458692040069	1.40945	1.2762	2.87437	0.638166		2016.07	2016-01-26	2016-01-26T05:44:45	1453787085044	2.58981	2.31758	5.49236	1.16718		2016.17	2016-03-03	2016-03-03T05:59:18	1456984758102	0.883887	0.763901	2.26583	0.259618		2016.39	2016-05-20	2016-05-20T14:26:35	1463754395655	1.7229	1.32993	4.53286	0.550981		2015.2	2015-03-14	2015-03-14T11:52:27	1426333947425	3.27457
2016.05	2016-01-17	2016-01-17T10:06:32	1453025192265	3.09116	2.87126	6.06371	1.53457		2016.15	2016-02-22	2016-02-22T10:55:18	1456138518818	1.40945	1.2762	2.87437	0.638166		2015.99	2015-12-25	2015-12-25T21:51:23	1451080283938	2.42797	2.2058	4.80457	1.16718		2016.09	2016-02-02	2016-02-02T01:51:24	1454377884262	0.875993	0.743201	2.35611	0.257894		2016.31	2016-04-22	2016-04-22T21:04:33	1461359073005	1.51596	1.19613	4.26678	0.544599		2015.09	2015-02-01	2015-02-01T05:40:35	1422769235768	2.97821
2015.97	2015-12-17	2015-12-17T18:35:27	1450377327780	3.02702	2.82659	5.7585	1.51623		2016.07	2016-01-23	2016-01-23T21:36:37	1453584997566	1.40945	1.2762	2.87437	0.638166		2015.9	2015-11-24	2015-11-24T13:58:02	1448373482832	2.39068	2.1889	4.53061	1.16718		2016.01	2016-01-02	2016-01-02T21:43:30	1451771010422	0.868446	0.741309	2.31414	0.257894		2016.24	2016-03-26	2016-03-26T03:42:30	1458963750355	1.36922	1.15006	3.75952	0.541885		2014.98	2014-12-21	2014-12-21T23:28:44	1419204524110	2.55768
2015.88	2015-11-17	2015-11-17T03:04:23	1447729463294	3.01685	2.82501	5.74448	1.51623		2015.99	2015-12-25	2015-12-25T08:17:56	1451031476315	1.40945	1.2762	2.87437	0.638166		2015.82	2015-10-24	2015-10-24T06:04:41	1445666681726	2.38771	2.1889	4.51713	1.16718		2015.93	2015-12-03	2015-12-03T17:35:36	1449164136583	0.869765	0.73276	2.35611	0.257894		2016.16	2016-02-27	2016-02-27T10:20:27	1456568427705	1.29223	1.13184	3.04139	0.540531		2014.86	2014-11-10	2014-11-10T17:16:52	1415639812453	2.46442
2015.8	2015-10-17	2015-10-17T11:33:18	1445081598809	3.01514	2.82501	5.74448	1.51623		2015.91	2015-11-25	2015-11-25T18:59:15	1448477955063	1.40945	1.2762	2.87437	0.638166		2015.73	2015-09-22	2015-09-22T22:11:20	1442959880620	2.38771	2.1889	4.51713	1.16718		2015.84	2015-11-03	2015-11-03T13:27:42	1446557262743	0.87408	0.739464	2.35611	0.257894		2016.09	2016-01-30	2016-01-30T16:58:25	1454173105055	1.25353	1.12588	2.68465	0.540531		2014.75	2014-09-30	2014-09-30T11:05:00	1412075100795	2.45455
2015.71	2015-09-16	2015-09-16T20:02:14	1442433734324	3.01514	2.82501	5.74448	1.51623		2015.82	2015-10-27	2015-10-27T05:40:33	1445924433811	1.40945	1.2762	2.87437	0.638166		2015.64	2015-08-22	2015-08-22T14:17:59	1440253079513	2.38771	2.1889	4.51713	1.16718		2015.76	2015-10-04	2015-10-04T09:19:48	1443950388903	0.87657	0.739464	2.39829	0.257894		2016.01	2016-01-02	2016-01-02T23:36:22	1451777782406	1.24141	1.12461	2.60596	0.540531		2014.64	2014-08-20	2014-08-20T04:53:09	1408510389138	2.46348
2015.63	2015-08-17	2015-08-17T04:31:09	1439785869839	3.04207	2.84483	5.74448	1.54033		2015.74	2015-09-27	2015-09-27T16:21:52	1443370912559	1.40945	1.2762	2.87437	0.638166		2015.56	2015-07-22	2015-07-22T06:24:38	1437546278407	3.45846	3.21809	6.6135	1.35803		2015.68	2015-09-04	2015-09-04T05:11:55	1441343515064	0.87657	0.739464	2.39829	0.257894		2015.93	2015-12-06	2015-12-06T06:14:19	1449382459756	1.23821	1.12368	2.57143	0.540531		2014.52	2014-07-09	2014-07-09T22:41:17	1404945677480	1.90803
2015.55	2015-07-17	2015-07-17T13:00:05	1437138005354	4.16597	3.90711	8.11614	1.66501		2015.66	2015-08-29	2015-08-29T03:03:11	1440817391307	1.50554	1.31299	3.42113	0.675389		2015.47	2015-06-20	2015-06-20T22:31:17	1434839477301	3.1937	2.77105	6.97766	1.23979		2015.6	2015-08-05	2015-08-05T01:04:01	1438736641224	1.78321	1.61476	3.9626	0.667912		2015.86	2015-11-08	2015-11-08T12:52:17	1446987137106	1.23598	1.12368	2.56676	0.540531		2014.41	2014-05-29	2014-05-29T16:29:25	1401380965822	1.54908
2015.46	2015-06-16	2015-06-16T21:29:00	1434490140869	3.93759	3.64731	7.93004	1.74149		2015.58	2015-07-30	2015-07-30T13:44:30	1438263870055	4.38102	3.95037	9.6953	1.78909		2015.39	2015-05-20	2015-05-20T14:37:56	1432132676195	4.44514	4.15644	8.55987	1.82995		2015.51	2015-07-05	2015-07-05T20:56:07	1436129767384	1.67327	1.46296	4.00709	0.527644		2015.78	2015-10-11	2015-10-11T19:30:14	1444591814456	1.23598	1.12368	2.56676	0.540531		2014.3	2014-04-18	2014-04-18T10:17:34	1397816254165	1.58914
2015.38	2015-05-17	2015-05-17T05:57:56	1431842276384	5.11326	4.87268	9.47744	2.09067		2015.5	2015-07-01	2015-07-01T00:25:48	1435710348803	4.60318	4.12783	10.3714	1.72835		2015.3	2015-04-19	2015-04-19T06:44:35	1429425875089	4.56845	4.25515	8.52801	2.25757		2015.43	2015-06-05	2015-06-05T16:48:13	1433522893545	1.69848	1.50719	4.05931	0.662386		2015.71	2015-09-14	2015-09-14T02:08:11	1442196491806	1.23598	1.12368	2.56676	0.540531		2014.19	2014-03-08	2014-03-08T04:05:42	1394251542507	1.51937
2015.29	2015-04-16	2015-04-16T14:26:51	1429194411899	5.14277	4.87575	9.47744	2.37128		2015.42	2015-06-01	2015-06-01T11:07:07	1433156827551	3.94846	3.60182	8.55643	1.14156		2015.22	2015-03-18	2015-03-18T22:51:13	1426719073983	4.82888	4.56094	8.69552	2.09651		2015.35	2015-05-06	2015-05-06T12:40:19	1430916019705	1.87806	1.7196	4.02075	0.823968		2015.63	2015-08-17	2015-08-17T08:46:09	1439801169163	1.87338	1.63041	4.60771	0.575397		2014.07	2014-01-25	2014-01-25T21:53:50	1390686830850	1.41682
2015.21	2015-03-16	2015-03-16T22:55:47	1426546547414	4.75858	4.48076	9.41821	1.87008		2015.34	2015-05-02	2015-05-02T21:48:26	1430603306300	3.6872	3.33786	8.09821	1.44192		2015.13	2015-02-15	2015-02-15T14:57:52	1424012272877	4.55623	4.24144	8.71042	1.8214		2015.27	2015-04-06	2015-04-06T08:32:25	1428309145865	1.76626	1.62526	3.59984	0.808362		2015.55	2015-07-20	2015-07-20T15:24:06	1437405846513	2.41444	2.13895	5.84503	0.733876		2013.96	2013-12-15	2013-12-15T15:41:59	1387122119192	1.37888
2015.13	2015-02-14	2015-02-14T07:24:42	1423898682929	3.74077	3.23286	8.60053	1.67275		2015.26	2015-04-03	2015-04-03T08:29:45	1428049785049	3.80342	3.57584	8.10403	1.49401		2015.04	2015-01-15	2015-01-15T07:04:31	1421305471771	4.29166	3.90178	8.71042	1.80196		2015.18	2015-03-07	2015-03-07T04:24:32	1425702272026	1.72326	1.61038	3.3545	0.618834		2015.48	2015-06-22	2015-06-22T22:02:03	1435010523863	2.30112	2.04437	5.6551	0.702785		2013.85	2013-11-04	2013-11-04T09:30:07	1383557407535	1.37888
2015.04	2015-01-14	2015-01-14T15:53:38	1421250818444	3.3402	3.07964	6.55258	1.63639		2015.18	2015-03-04	2015-03-04T19:11:03	1425496263797	3.58687	3.22725	7.9541	1.4064		2014.96	2014-12-14	2014-12-14T23:11:10	1418598670665	4.22908	3.87394	8.67389	1.80196		2015.1	2015-02-05	2015-02-05T00:16:38	1423095398186	1.60341	1.50719	3.30986	0.438622		2015.4	2015-05-26	2015-05-26T04:40:01	1432615201213	2.47692	2.27373	5.33587	0.824391		2013.73	2013-09-24	2013-09-24T03:18:15	1379992695877	1.37888
2014.96	2014-12-15	2014-12-15T00:22:33	1418602953959	3.28547	3.06449	6.21348	1.64042		2015.1	2015-02-03	2015-02-03T05:52:22	1422942742545	3.28968	2.91918	7.57045	1.3898		2014.87	2014-11-13	2014-11-13T15:17:49	1415891869558	4.2121	3.87394	8.5179	1.80196		2015.02	2015-01-05	2015-01-05T20:08:44	1420488524346	1.3657	1.1971	3.24199	0.403656		2015.33	2015-04-28	2015-04-28T11:17:58	1430219878563	2.52615	2.27975	5.40685	0.976272		2013.62	2013-08-13	2013-08-13T21:06:24	1376427984220	1.72245
2014.87	2014-11-14	2014-11-14T08:51:29	1415955089473	3.28561	3.06449	6.21348	1.63639		2015.01	2015-01-04	2015-01-04T16:33:41	1420389221293	3.15862	2.87312	6.59294	1.36385		2014.79	2014-10-13	2014-10-13T07:24:28	1413185068452	4.2121	3.87394	8.5179	1.80196		2014.93	2014-12-06	2014-12-06T16:00:50	1417881650507	1.16025	0.948928	3.08952	0.393299		2015.25	2015-03-31	2015-03-31T17:55:55	1427824555913	2.58192	2.3648	5.30245	1.08861		2013.51	2013-07-03	2013-07-03T14:54:32	1372863272562	1.81221
2014.79	2014-10-14	2014-10-14T17:20:24	1413307224988	3.28343	3.06091	6.21348	1.57425		2014.93	2014-12-06	2014-12-06T03:15:00	1417835700041	3.1412	2.87038	6.58112	1.36294		2014.7	2014-09-11	2014-09-11T23:31:07	1410478267346	4.22343	3.88141	8.5179	1.8214		2014.85	2014-11-06	2014-11-06T11:52:56	1415274776667	1.07775	0.91021	2.72521	0.387558		2015.17	2015-03-04	2015-03-04T00:33:53	1425429233264	2.57698	2.37204	5.31985	0.989969		2013.39	2013-05-23	2013-05-23T08:42:40	1369298560905	1.65948
2014.71	2014-09-14	2014-09-14T01:49:20	1410659360503	3.19962	3.00612	6.21348	1.3159		2014.85	2014-11-06	2014-11-06T13:56:18	1415282178789	3.1412	2.87038	6.58112	1.36294		2014.61	2014-08-11	2014-08-11T15:37:46	1407771466240	4.71651	4.41291	8.92477	1.91204		2014.77	2014-10-07	2014-10-07T07:45:02	1412667902827	1.05067	0.904115	2.46473	0.387558		2015.1	2015-02-04	2015-02-04T07:11:50	1423033910614	2.42917	2.17919	5.27835	0.917566		2013.28	2013-04-12	2013-04-12T02:30:49	1365733849247	1.65175
2014.62	2014-08-14	2014-08-14T10:18:16	1408011496018	2.43051	2.14072	5.75131	1.07951		2014.77	2014-10-08	2014-10-08T00:37:37	1412728657537	3.14135	2.87038	6.58112	1.37747		2014.53	2014-07-11	2014-07-11T07:44:25	1405064665134	4.18179	3.88061	8.55528	1.80403		2014.69	2014-09-07	2014-09-07T03:37:08	1410061028988	1.0446	0.903603	2.37134	0.387558		2015.02	2015-01-07	2015-01-07T13:49:47	1420638587964	2.25454	2.00656	5.00069	0.902751		2013.17	2013-03-01	2013-03-01T20:18:57	1362169137590	1.65175
2014.54	2014-07-14	2014-07-14T18:47:11	1405363631533	1.66271	1.32694	4.18769	0.514949		2014.69	2014-09-08	2014-09-08T11:18:56	1410175136285	3.132	2.87038	6.58112	1.19109		2014.44	2014-06-09	2014-06-09T23:51:04	1402357864028	3.76431	3.35306	8.3173	1.50985		2014.6	2014-08-07	2014-08-07T23:29:15	1407454155148	1.44785	1.32525	3.11542	0.560024		2014.95	2014-12-10	2014-12-10T20:27:45	1418243265314	2.14429	1.94307	4.54466	0.894552		2013.06	2013-01-19	2013-01-19T14:07:05	1358604425932	1.65175
2014.45	2014-06-14	2014-06-14T03:16:07	1402715767048	1.82177	1.63433	3.90066	0.83688		2014.61	2014-08-09	2014-08-09T22:00:15	1407621615034	2.05497	1.60323	6.20694	0.650694		2014.36	2014-05-09	2014-05-09T15:57:42	1399651062922	3.0454	2.79391	6.32171	1.46672		2014.52	2014-07-08	2014-07-08T19:21:21	1404847281308	1.46366	1.3597	3.0979	0.535366		2014.87	2014-11-13	2014-11-13T03:05:42	1415847942664	2.10818	1.92667	4.32785	0.894552		2012.94	2012-12-08	2012-12-08T07:55:14	1354953314274	1.65175
2014.37	2014-05-14	2014-05-14T11:45:02	1400067902563	2.29428	2.1605	4.40707	1.17428		2014.53	2014-07-11	2014-07-11T08:41:33	1405068093782	1.17192	0.882421	3.40195	0.365229		2014.27	2014-04-08	2014-04-08T08:04:21	1396944261816	2.96673	2.7977	5.36258	1.49484		2014.44	2014-06-08	2014-06-08T15:13:27	1402240407469	1.29811	1.13424	3.11542	0.463929		2014.79	2014-10-16	2014-10-16T09:43:40	1413452620015	2.09792	1.92555	4.25379	0.894552		2012.83	2012-10-28	2012-10-28T01:43:22	1351388602617	1.65175
2014.29	2014-04-13	2014-04-13T20:13:58	1397420038078	2.34668	2.19471	4.42839	1.15092		2014.45	2014-06-11	2014-06-11T19:22:52	1402514572530	0.968437	0.88956	2.04188	0.41772		2014.19	2014-03-08	2014-03-08T00:11:00	1394237460710	2.81412	2.68059	5.32324	1.03003		2014.36	2014-05-09	2014-05-09T11:05:33	1399633533629	1.24466	1.1246	2.71856	0.483838		2014.72	2014-09-18	2014-09-18T16:21:37	1411057297365	2.09664	1.92555	4.24114	0.894552		2012.72	2012-09-16	2012-09-16T19:31:30	1347823890959	1.65175
2014.2	2014-03-14	2014-03-14T04:42:53	1394772173593	2.34585	2.19083	4.42839	1.15092		2014.37	2014-05-13	2014-05-13T06:04:11	1399961051278	0.871617	0.801235	1.75824	0.410614		2014.1	2014-02-04	2014-02-04T16:17:39	1391530659603	2.29993	1.96924	5.07828	0.902053		2014.27	2014-04-09	2014-04-09T06:57:39	1397026659789	1.35102	1.24368	2.77733	0.601229		2014.64	2014-08-21	2014-08-21T22:59:34	1408661974715	2.06765	1.9175	4.24441	0.70496		2012.6	2012-08-06	2012-08-06T13:19:39	1344259179302	1.65175
2014.12	2014-02-11	2014-02-11T13:11:49	1392124309108	2.34585	2.19083	4.42839	1.15092		2014.29	2014-04-13	2014-04-13T16:45:30	1397407530026	0.843842	0.791584	1.57953	0.410614		2014.01	2014-01-04	2014-01-04T08:24:18	1388823858497	1.98571	1.76757	4.46111	0.871197		2014.19	2014-03-10	2014-03-10T02:49:45	1394419785950	1.43636	1.3212	2.94938	0.584669		2014.57	2014-07-25	2014-07-25T05:37:32	1406266652065	1.41346	1.22368	3.59526	0.545867		2012.49	2012-06-26	2012-06-26T07:07:47	1340694467644	1.65175
2014.03	2014-01-11	2014-01-11T21:40:44	1389476444623	2.34585	2.19083	4.42839	1.15092		2014.2	2014-03-15	2014-03-15T03:26:48	1394854008774	0.842613	0.791584	1.56557	0.410614		2013.93	2013-12-04	2013-12-04T00:30:57	1386117057391	1.91061	1.74509	3.88093	0.871197		2014.11	2014-02-07	2014-02-07T22:41:52	1391812912110	1.49596	1.37358	3.1866	0.560954		2014.49	2014-06-27	2014-06-27T12:15:29	1403871329415	1.05492	0.887045	2.73622	0.358805		2012.38	2012-05-16	2012-05-16T00:55:55	1337129755987	1.65175
2013.95	2013-12-12	2013-12-12T06:09:40	1386828580138	2.34585	2.19083	4.42839	1.15092		2014.12	2014-02-13	2014-02-13T14:08:07	1392300487522	0.842613	0.791584	1.56557	0.410614		2013.84	2013-11-02	2013-11-02T16:37:36	1383410256285	1.899	1.7436	3.66787	0.871197		2014.03	2014-01-08	2014-01-08T18:33:58	1389206038270	1.50129	1.34822	3.20788	0.554979		2014.41	2014-05-30	2014-05-30T18:53:26	1401476006766	0.92971	0.853928	2.00438	0.292213		2012.26	2012-04-04	2012-04-04T18:44:04	1333565044329	1.65175
2013.87	2013-11-11	2013-11-11T14:38:35	1384180715652	2.34585	2.19083	4.42839	1.15092		2014.04	2014-01-15	2014-01-15T00:49:26	1389746966270	0.842613	0.791584	1.56557	0.410614		2013.76	2013-10-02	2013-10-02T08:44:15	1380703455179	1.899	1.7436	3.66787	0.871197		2013.94	2013-12-09	2013-12-09T14:26:04	1386599164430	1.48928	1.31786	3.26744	0.54979		2014.34	2014-05-03	2014-05-03T01:31:24	1399080684116	0.836128	0.745623	1.97729	0.236362		2012.15	2012-02-23	2012-02-23T12:32:12	1330000332676	1.65175
2013.78	2013-10-11	2013-10-11T23:07:31	1381532851167	2.34585	2.19083	4.42839	1.15092		2013.96	2013-12-16	2013-12-16T11:30:45	1387193445019	0.842613	0.791584	1.56557	0.410614		2013.67	2013-09-01	2013-09-01T00:50:54	1377996654073	2.15347	2.00711	3.94466	1.0472		2013.86	2013-11-09	2013-11-09T10:18:10	1383992290591	1.47905	1.30792	3.29303	0.54979		2014.26	2014-04-05	2014-04-05T08:09:21	1396685361466	0.716048	0.555654	1.94135	0.228763		2012.04	2012-01-13	2012-01-13T06:20:21	1326435621018	1.65175
2013.7	2013-09-11	2013-09-11T07:36:26	1378884986682	2.34585	2.19083	4.42839	1.15092		2013.88	2013-11-16	2013-11-16T22:12:03	1384639923767	0.842613	0.791584	1.56557	0.410614		2013.58	2013-07-31	2013-07-31T16:57:32	1375289852967	2.1495	2.02765	3.9899	0.982102		2013.78	2013-10-10	2013-10-10T06:10:16	1381385416751	1.46941	1.30749	3.29303	0.54979		2014.19	2014-03-08	2014-03-08T14:47:18	1394290038816	0.641923	0.518718	1.81664	0.227846		2011.92	2011-12-03	2011-12-03T00:08:29	1322870909361	1.65175
2013.61	2013-08-11	2013-08-11T16:05:22	1376237122197	2.35893	2.20244	4.57761	1.0378		2013.8	2013-10-18	2013-10-18T08:53:22	1382086402515	0.842613	0.791584	1.56557	0.410614		2013.5	2013-06-30	2013-06-30T09:04:11	1372583051861	2.17577	2.05034	3.9899	1.04829		2013.69	2013-09-10	2013-09-10T02:02:22	1378778542911	1.46871	1.30749	3.29303	0.54979		2014.11	2014-02-08	2014-02-08T21:25:16	1391894716166	0.608631	0.512452	1.6043	0.227846		2011.81	2011-10-22	2011-10-22T17:56:37	1319306197703	1.65175
2013.53	2013-07-12	2013-07-12T00:34:17	1373589257712	2.31045	2.18294	4.53484	1.00606		2013.72	2013-09-18	2013-09-18T19:34:41	1379532881263	0.860513	0.801938	1.63416	0.420716		2013.41	2013-05-30	2013-05-30T01:10:50	1369876250755	1.90106	1.79259	3.67234	0.966464		2013.61	2013-08-10	2013-08-10T21:54:29	1376171669072	2.01774	1.85952	4.17119	0.796604		2014.03	2014-01-12	2014-01-12T04:03:13	1389499393517	0.597903	0.511345	1.47938	0.227429		2011.7	2011-09-11	2011-09-11T11:44:46	1315741486046	1.65175
2013.45	2013-06-11	2013-06-11T09:03:13	1370941393227	1.74651	1.53115	4.21725	0.835513		2013.64	2013-08-20	2013-08-20T06:16:00	1376979360011	1.56937	1.44382	3.43785	0.566516		2013.33	2013-04-28	2013-04-28T17:17:29	1367169449648	1.84103	1.76901	3.18565	0.966464		2013.53	2013-07-11	2013-07-11T17:46:35	1373564795232	1.97635	1.81631	4.08506	0.757979		2013.96	2013-12-15	2013-12-15T10:41:10	1387104070867	0.595039	0.51127	1.46607	0.227429		2011.59	2011-08-01	2011-08-01T05:32:54	1312176774388	1.65175
2013.36	2013-05-11	2013-05-11T17:32:08	1368293528742	1.56455	1.48909	2.6198	0.835513		2013.56	2013-07-21	2013-07-21T16:57:18	1374425838759	1.58392	1.4317	3.44034	0.616759		2013.24	2013-03-28	2013-03-28T09:24:08	1364462648542	1.84103	1.76901	3.18565	0.966464		2013.45	2013-06-11	2013-06-11T13:38:41	1370957921392	1.64294	1.35074	4.05411	0.665199		2013.88	2013-11-17	2013-11-17T17:19:08	1384708748217	0.59496	0.51127	1.46607	0.227429		2011.47	2011-06-20	2011-06-20T23:21:02	1308612062730	1.65175
2013.28	2013-04-11	2013-04-11T02:01:04	1365645664257	1.55313	1.48523	2.59883	0.835513		2013.48	2013-06-22	2013-06-22T03:38:37	1371872317507	1.34628	1.15752	3.3442	0.588235		2013.16	2013-02-25	2013-02-25T01:30:47	1361755847436	1.84103	1.76901	3.18565	0.966464		2013.36	2013-05-12	2013-05-12T09:30:47	1368351047553	1.43201	1.27768	3.52222	0.659549		2013.81	2013-10-20	2013-10-20T23:57:05	1382313425567	0.59496	0.51127	1.46607	0.227429		2011.36	2011-05-10	2011-05-10T17:09:11	1305047351073	1.65175
2013.19	2013-03-11	2013-03-11T10:29:59	1362997799772	1.55313	1.48523	2.59883	0.835513		2013.39	2013-05-23	2013-05-23T14:19:56	1369318796255	1.22965	1.13009	2.37396	0.588235		2013.07	2013-01-24	2013-01-24T17:37:26	1359049046330	1.84103	1.76901	3.18565	0.966464		2013.28	2013-04-12	2013-04-12T05:22:53	1365744173713	1.36824	1.26447	2.70297	0.659549		2013.73	2013-09-23	2013-09-23T06:35:02	1379918102917	0.59496	0.51127	1.46607	0.227429		2011.25	2011-03-30	2011-03-30T10:57:19	1301482639415	1.65175
2013.11	2013-02-08	2013-02-08T18:58:55	1360349935293	1.55313	1.48523	2.59883	0.835513		2013.31	2013-04-24	2013-04-24T01:01:15	1366765275003	1.2233	1.13009	2.32078	0.588235		2012.98	2012-12-23	2012-12-23T09:44:05	1356255845224	1.84103	1.76901	3.18565	0.966464		2013.2	2013-03-13	2013-03-13T01:14:59	1363137299873	1.36676	1.26447	2.7025	0.659549		2013.66	2013-08-26	2013-08-26T13:13:00	1377522780268	1.62428	1.45867	3.48752	0.631011		2011.13	2011-02-17	2011-02-17T04:45:27	1297917927758	1.65175
2013.03	2013-01-09	2013-01-09T03:27:50	1357702070808	1.55313	1.48523	2.59883	0.835513		2013.23	2013-03-25	2013-03-25T11:42:33	1364211753752	1.2233	1.13009	2.32078	0.588235		2012.9	2012-11-22	2012-11-22T01:50:44	1353549044118	1.84103	1.76901	3.18565	0.966464		2013.12	2013-02-10	2013-02-10T21:07:06	1360530426034	1.36104	1.26447	2.66962	0.659549		2013.58	2013-07-29	2013-07-29T19:50:57	1375127457618	1.64726	1.48308	3.54014	0.654615		2011.02	2011-01-06	2011-01-06T22:33:36	1294353216100	1.65175
2012.94	2012-12-08	2012-12-08T11:56:46	1354967806322	1.55313	1.48523	2.59883	0.835513		2013.15	2013-02-23	2013-02-23T22:23:52	1361658232500	1.2233	1.13009	2.32078	0.588235		2012.81	2012-10-21	2012-10-21T17:57:23	1350842243012	1.84103	1.76901	3.18565	0.966464		2013.03	2013-01-11	2013-01-11T16:59:12	1357923552194	1.36104	1.26447	2.66962	0.659549		2013.5	2013-07-02	2013-07-02T02:28:54	1372732134968	1.66358	1.50622	3.5403	0.667528		2010.91	2010-11-26	2010-11-26T16:21:44	1290788504443	1.65175
2012.86	2012-11-07	2012-11-07T20:25:41	1352319941837	1.55313	1.48523	2.59883	0.835513		2013.07	2013-01-25	2013-01-25T09:05:11	1359104711248	1.2233	1.13009	2.32078	0.588235		2012.73	2012-09-20	2012-09-20T10:04:01	1348135441906	1.84103	1.76901	3.18565	0.966464		2012.95	2012-12-11	2012-12-11T12:51:18	1355230278354	1.36104	1.26447	2.66962	0.659549		2013.43	2013-06-04	2013-06-04T09:06:52	1370336812318	1.47041	1.26047	3.44289	0.622934		2010.79	2010-10-16	2010-10-16T10:09:52	1287223792785	1.65175
2012.77	2012-10-08	2012-10-08T04:54:37	1349672077352	1.55313	1.48523	2.59883	0.835513		2012.99	2012-12-25	2012-12-25T19:46:29	1356464789996	1.2233	1.13009	2.32078	0.588235		2012.64	2012-08-20	2012-08-20T02:10:40	1345428640805	1.84103	1.76901	3.18565	0.966464		2012.87	2012-11-11	2012-11-11T08:43:24	1352623404515	1.36104	1.26447	2.66962	0.659549		2013.35	2013-05-07	2013-05-07T15:44:49	1367941489668	1.32889	1.20419	2.82893	0.617224		2010.68	2010-09-05	2010-09-05T03:58:01	1283659081128	1.65175
2012.69	2012-09-07	2012-09-07T13:23:32	1347024212867	1.55313	1.48523	2.59883	0.835513		2012.91	2012-11-26	2012-11-26T06:27:48	1353911268744	1.2233	1.13009	2.32078	0.588235		2012.55	2012-07-19	2012-07-19T18:17:19	1342721839698	1.84103	1.76901	3.18565	0.966464		2012.79	2012-10-12	2012-10-12T04:35:30	1350016530675	1.36104	1.26447	2.66962	0.659549		2013.28	2013-04-09	2013-04-09T22:22:47	1365546167018	1.29409	1.19867	2.52083	0.616771		2010.57	2010-07-25	2010-07-25T21:46:09	1280094369470	1.65175
2012.61	2012-08-07	2012-08-07T21:52:28	1344376348382	1.55313	1.48523	2.59883	0.835513		2012.83	2012-10-27	2012-10-27T17:09:07	1351357747492	1.2233	1.13009	2.32078	0.588235		2012.47	2012-06-18	2012-06-18T10:23:58	1340015038592	1.84103	1.76901	3.18565	0.966464		2012.7	2012-09-12	2012-09-12T00:27:36	1347409656835	1.36104	1.26447	2.66962	0.659549		2013.2	2013-03-13	2013-03-13T05:00:44	1363150844369	1.29067	1.19778	2.50813	0.616771		2010.46	2010-06-14	2010-06-14T15:34:17	1276529657813	1.65175
2012.52	2012-07-08	2012-07-08T06:21:23	1341728483897	1.55313	1.48523	2.59883	0.835513		2012.75	2012-09-28	2012-09-28T03:50:26	1348804226240	1.2233	1.13009	2.32078	0.588235		2012.38	2012-05-18	2012-05-18T02:30:37	1337308237486	1.84103	1.76901	3.18565	0.966464		2012.62	2012-08-12	2012-08-12T20:19:42	1344802782996	1.36104	1.26447	2.66962	0.659549		2013.12	2013-02-13	2013-02-13T11:38:41	1360755521719	1.28983	1.19778	2.50301	0.616771		2010.34	2010-05-04	2010-05-04T09:22:26	1272964946155	1.65175
2012.44	2012-06-07	2012-06-07T14:50:19	1339080619412	1.55313	1.48523	2.59883	0.835513		2012.67	2012-08-29	2012-08-29T14:31:44	1346250704988	1.2233	1.13009	2.32078	0.588235		2012.3	2012-04-16	2012-04-16T18:37:16	1334601436380	1.84103	1.76901	3.18565	0.966464		2012.54	2012-07-13	2012-07-13T16:11:49	1342195909156	1.36104	1.26447	2.66962	0.659549		2013.05	2013-01-16	2013-01-16T18:16:39	1358360199069	1.28983	1.19778	2.50301	0.616771		2010.23	2010-03-24	2010-03-24T03:10:34	1269400234497	1.65175
2012.35	2012-05-07	2012-05-07T23:19:14	1336432754927	1.55313	1.48523	2.59883	0.835513		2012.59	2012-07-31	2012-07-31T01:13:03	1343697183737	1.2233	1.13009	2.32078	0.588235		2012.21	2012-03-16	2012-03-16T10:43:55	1331894635274	1.84103	1.76901	3.18565	0.966464		2012.45	2012-06-13	2012-06-13T12:03:55	1339589035316	1.36104	1.26447	2.66962	0.659549		2012.97	2012-12-19	2012-12-19T00:54:36	1355878476419	1.28983	1.19778	2.50301	0.616771		2010.12	2010-02-10	2010-02-10T20:58:42	1265835522840	1.65175
2012.27	2012-04-07	2012-04-07T07:48:10	1333784890442	1.55313	1.48523	2.59883	0.835513		2012.5	2012-07-01	2012-07-01T11:54:22	1341143662485	1.2233	1.13009	2.32078	0.588235		2012.13	2012-02-14	2012-02-14T02:50:34	1329187834168	1.84103	1.76901	3.18565	0.966464		2012.37	2012-05-14	2012-05-14T07:56:01	1336982161477	1.36104	1.26447	2.66962	0.659549		2012.9	2012-11-21	2012-11-21T07:32:33	1353483153769	1.28983	1.19778	2.50301	0.616771		2010	2009-12-31	2009-12-31T14:46:51	1262270811182	1.65175
2012.19	2012-03-07	2012-03-07T16:17:05	1331137025957	1.55313	1.48523	2.59883	0.835513		2012.42	2012-06-01	2012-06-01T22:35:41	1338590141233	1.2233	1.13009	2.32078	0.588235		2012.04	2012-01-13	2012-01-13T18:57:13	1326481033062	1.84103	1.76901	3.18565	0.966464		2012.29	2012-04-14	2012-04-14T03:48:07	1334375287637	1.36104	1.26447	2.66962	0.659549		2012.82	2012-10-24	2012-10-24T14:10:31	1351087831120	1.28983	1.19778	2.50301	0.616771		2009.89	2009-11-20	2009-11-20T08:34:59	1258706099525	1.65175
2012.1	2012-02-06	2012-02-06T00:46:01	1328489161472	1.55313	1.48523	2.59883	0.835513		2012.34	2012-05-03	2012-05-03T09:16:59	1336036619981	1.2233	1.13009	2.32078	0.588235		2011.95	2011-12-13	2011-12-13T11:03:51	1323774231956	1.84103	1.76901	3.18565	0.966464		2012.21	2012-03-14	2012-03-14T23:40:13	1331768413797	1.36104	1.26447	2.66962	0.659549		2012.74	2012-09-26	2012-09-26T20:48:28	1348692508470	1.28983	1.19778	2.50301	0.616771		2009.78	2009-10-10	2009-10-10T02:23:07	1255141387867	1.65175
2012.02	2012-01-06	2012-01-06T09:14:56	1325841296987	1.55313	1.48523	2.59883	0.835513		2012.26	2012-04-03	2012-04-03T19:58:18	1333483098729	1.2233	1.13009	2.32078	0.588235		2011.87	2011-11-12	2011-11-12T03:10:30	1321067430850	1.84103	1.76901	3.18565	0.966464		2012.12	2012-02-13	2012-02-13T19:32:19	1329161539958	1.36104	1.26447	2.66962	0.659549		2012.67	2012-08-30	2012-08-30T03:26:25	1346297185820	1.28983	1.19778	2.50301	0.616771		2009.66	2009-08-29	2009-08-29T20:11:16	1251576676210	1.65175
2011.94	2011-12-06	2011-12-06T17:43:52	1323193432501	1.55313	1.48523	2.59883	0.835513		2012.18	2012-03-05	2012-03-05T06:39:37	1330929577477	1.2233	1.13009	2.32078	0.588235		2011.78	2011-10-11	2011-10-11T19:17:09	1318360629743	1.84103	1.76901	3.18565	0.966464		2012.04	2012-01-14	2012-01-14T15:24:26	1326554666118	1.36104	1.26447	2.66962	0.659549		2012.59	2012-08-02	2012-08-02T10:04:23	1343901863170	1.28983	1.19778	2.50301	0.616771		2009.55	2009-07-19	2009-07-19T13:59:24	1248011964552	1.65175
2011.85	2011-11-06	2011-11-06T02:12:48	1320545568016	1.55313	1.48523	2.59883	0.835513		2012.1	2012-02-04	2012-02-04T17:20:56	1328376056225	1.2233	1.13009	2.32078	0.588235		2011.7	2011-09-10	2011-09-10T11:23:48	1315653828637	1.84103	1.76901	3.18565	0.966464		2011.96	2011-12-15	2011-12-15T11:16:32	1323947792278	1.36104	1.26447	2.66962	0.659549		2012.52	2012-07-05	2012-07-05T16:42:20	1341506540520	1.28983	1.19778	2.50301	0.616771		2009.44	2009-06-08	2009-06-08T07:47:32	1244447252895	1.65175
2011.77	2011-10-06	2011-10-06T10:41:43	1317897703531	1.55313	1.48523	2.59883	0.835513		2012.02	2012-01-06	2012-01-06T04:02:14	1325822534973	1.2233	1.13009	2.32078	0.588235		2011.61	2011-08-10	2011-08-10T03:30:27	1312947027531	1.84103	1.76901	3.18565	0.966464		2011.88	2011-11-15	2011-11-15T07:08:38	1321340918439	1.36104	1.26447	2.66962	0.659549		2012.44	2012-06-07	2012-06-07T23:20:17	1339111217871	1.2899	1.19778	2.50301	0.616607		2009.32	2009-04-28	2009-04-28T01:35:41	1240882541237	1.65175
2011.68	2011-09-05	2011-09-05T19:10:39	1315249839046	1.55313	1.48523	2.59883	0.835513		2011.94	2011-12-07	2011-12-07T14:43:33	1323269013721	1.2233	1.13009	2.32078	0.588235		2011.52	2011-07-09	2011-07-09T19:37:06	1310240226425	1.84103	1.76901	3.18565	0.966464		2011.79	2011-10-16	2011-10-16T03:00:44	1318734044599	1.36104	1.26447	2.66962	0.659549		2012.36	2012-05-11	2012-05-11T05:58:15	1336715895221	1.2899	1.19778	2.50301	0.616607		2009.21	2009-03-17	2009-03-17T19:23:49	1237317829580	1.65175
2011.6	2011-08-06	2011-08-06T03:39:34	1312601974561	1.55313	1.48523	2.59883	0.835513		2011.86	2011-11-08	2011-11-08T01:24:52	1320715492470	1.2233	1.13009	2.32078	0.588235		2011.44	2011-06-08	2011-06-08T11:43:45	1307533425319	1.84103	1.76901	3.18565	0.966464		2011.71	2011-09-15	2011-09-15T22:52:50	1316127170771	1.36104	1.26447	2.66962	0.659549		2012.29	2012-04-13	2012-04-13T12:36:12	1334320572571	1.2899	1.19778	2.50301	0.616607		2009.1	2009-02-04	2009-02-04T13:11:57	1233753117922	1.65175
2011.52	2011-07-06	2011-07-06T12:08:30	1309954110076	1.55313	1.48523	2.59883	0.835513		2011.78	2011-10-09	2011-10-09T12:06:11	1318161971218	1.2233	1.13009	2.32078	0.588235		2011.35	2011-05-08	2011-05-08T03:50:24	1304826624213	1.84103	1.76901	3.18565	0.966464		2011.63	2011-08-16	2011-08-16T18:44:56	1313520296931	1.36104	1.26447	2.66962	0.659549		2012.21	2012-03-16	2012-03-16T19:14:09	1331925249921	1.2899	1.19778	2.50301	0.616607		2008.99	2008-12-24	2008-12-24T07:00:06	1230102006268	1.65175
2011.43	2011-06-05	2011-06-05T20:37:25	1307306245591	1.55313	1.48523	2.59883	0.835513		2011.69	2011-09-09	2011-09-09T22:47:29	1315608449966	1.2233	1.13009	2.32078	0.588235		2011.27	2011-04-06	2011-04-06T19:57:03	1302119823107	1.84103	1.76901	3.18565	0.966464		2011.55	2011-07-17	2011-07-17T14:37:03	1310913423092	1.36104	1.26447	2.66962	0.659549		2012.14	2012-02-18	2012-02-18T01:52:07	1329529927271	1.29003	1.19796	2.50708	0.616771		2008.87	2008-11-13	2008-11-13T00:48:14	1226537294610	1.65175
2011.35	2011-05-06	2011-05-06T05:06:21	1304658381106	1.55313	1.48523	2.59883	0.835513		2011.61	2011-08-11	2011-08-11T09:28:48	1313054928714	1.2233	1.13009	2.32078	0.588235		2011.18	2011-03-06	2011-03-06T12:03:42	1299413022001	1.84103	1.76901	3.18565	0.966464		2011.46	2011-06-17	2011-06-17T10:29:09	1308306549252	1.36104	1.26447	2.66962	0.659549		2012.06	2012-01-21	2012-01-21T08:30:04	1327134604622	1.29016	1.19831	2.50708	0.616771		2008.76	2008-10-02	2008-10-02T18:36:22	1222972582952	1.65175
2011.26	2011-04-05	2011-04-05T13:35:16	1302010516621	1.55362	1.48523	2.59883	0.835513		2011.53	2011-07-12	2011-07-12T20:10:07	1310501407462	1.2233	1.13009	2.32078	0.588235		2011.1	2011-02-03	2011-02-03T04:10:20	1296706220895	1.84103	1.76901	3.18565	0.966464		2011.38	2011-05-18	2011-05-18T06:21:15	1305699675412	1.36104	1.26447	2.66962	0.659549		2011.98	2011-12-24	2011-12-24T15:08:01	1324739281972	1.29019	1.19867	2.50708	0.616771		2008.65	2008-08-22	2008-08-22T12:24:31	1219407871295	1.65175
2011.18	2011-03-05	2011-03-05T22:04:12	1299362652136	1.55362	1.48523	2.59883	0.835513		2011.45	2011-06-13	2011-06-13T06:51:26	1307947886210	1.2233	1.13009	2.32078	0.588235		2011.01	2011-01-02	2011-01-02T20:16:59	1293999419788	1.84103	1.76901	3.18565	0.966464		2011.3	2011-04-18	2011-04-18T02:13:21	1303092801573	1.36104	1.26447	2.66962	0.659549		2011.91	2011-11-26	2011-11-26T21:45:59	1322343959322	1.29047	1.1989	2.50708	0.617224		2008.53	2008-07-12	2008-07-12T06:12:39	1215843159637	1.65203
2011.1	2011-02-03	2011-02-03T06:33:07	1296714787651	1.55415	1.48873	2.59883	0.835513		2011.37	2011-05-14	2011-05-14T17:32:44	1305394364958	1.2233	1.13009	2.32078	0.588235		2010.92	2010-12-02	2010-12-02T12:23:38	1291292618682	1.84103	1.76901	3.18565	0.966464		2011.21	2011-03-18	2011-03-18T22:05:27	1300485927733	1.36178	1.26447	2.66962	0.659549		2011.83	2011-10-30	2011-10-30T04:23:56	1319948636672	1.29065	1.19898	2.50708	0.617224		2008.42	2008-06-01	2008-06-01T00:00:47	1212278447980	1.65388
2011.01	2011-01-03	2011-01-03T15:02:03	1294066923165	1.55415	1.48873	2.59883	0.835513		2011.29	2011-04-15	2011-04-15T04:14:03	1302840843706	1.22416	1.13019	2.32078	0.588435		2010.84	2010-11-01	2010-11-01T04:30:17	1288585817576	1.84133	1.76901	3.18565	0.966464		2011.13	2011-02-16	2011-02-16T17:57:33	1297879053894	1.36178	1.26447	2.66962	0.659549		2011.76	2011-10-02	2011-10-02T11:01:54	1317553314022	1.29088	1.19923	2.50301	0.617224		2008.31	2008-04-20	2008-04-20T17:48:56	1208713736322	1.65388
2010.93	2010-12-03	2010-12-03T23:30:58	1291419058680	1.55415	1.48873	2.59883	0.835513		2011.21	2011-03-16	2011-03-16T14:55:22	1300287322455	1.22421	1.13009	2.32078	0.588435		2010.75	2010-09-30	2010-09-30T20:36:56	1285879016470	1.84139	1.76901	3.18565	0.966464		2011.05	2011-01-17	2011-01-17T13:49:40	1295272180055	1.36178	1.26447	2.66962	0.659549		2011.68	2011-09-04	2011-09-04T17:39:51	1315157991372	1.29168	1.2001	2.50708	0.617896		2008.19	2008-03-10	2008-03-10T11:37:04	1205149024665	1.65388
2010.84	2010-11-03	2010-11-03T07:59:54	1288771194195	1.55415	1.48873	2.59883	0.835513		2011.13	2011-02-15	2011-02-15T01:36:41	1297733801203	1.22489	1.13019	2.32078	0.588435		2010.67	2010-08-30	2010-08-30T12:43:35	1283172215364	1.84219	1.76901	3.18565	0.966464		2010.97	2010-12-18	2010-12-18T09:41:46	1292665306215	1.36224	1.26562	2.66962	0.659549		2011.6	2011-08-08	2011-08-08T00:17:48	1312762668723	1.29202	1.20051	2.50708	0.618158		2008.08	2008-01-29	2008-01-29T05:25:13	1201584313007	1.65399
2010.76	2010-10-03	2010-10-03T16:28:49	1286123329710	1.5551	1.48873	2.59883	0.835578		2011.05	2011-01-16	2011-01-16T12:17:59	1295180279951	1.22532	1.13019	2.32078	0.588435		2010.58	2010-07-30	2010-07-30T04:50:14	1280465414258	1.8415	1.76901	3.18565	0.966464		2010.88	2010-11-18	2010-11-18T05:33:52	1290058432375	1.36385	1.26623	2.66962	0.659549		2011.53	2011-07-11	2011-07-11T06:55:46	1310367346073	1.29306	1.20165	2.50757	0.618545		2007.97	2007-12-18	2007-12-18T23:13:21	1198019601351	1.65399
2010.68	2010-09-03	2010-09-03T00:57:45	1283475465225	1.5551	1.48873	2.59883	0.835578		2010.97	2010-12-17	2010-12-17T22:59:18	1292626758699	1.22532	1.13019	2.32078	0.588435		2010.49	2010-06-28	2010-06-28T20:56:53	1277758613152	1.842	1.76901	3.18565	0.966464		2010.8	2010-10-19	2010-10-19T01:25:58	1287451558536	1.3654	1.26631	2.66962	0.665199		2011.45	2011-06-13	2011-06-13T13:33:43	1307972023423	1.29475	1.20256	2.50757	0.623005		2007.86	2007-11-07	2007-11-07T17:01:29	1194454889693	1.65399
2010.59	2010-08-03	2010-08-03T09:26:40	1280827600740	1.55564	1.48523	2.59883	0.835578		2010.88	2010-11-18	2010-11-18T09:40:37	1290073237447	1.22485	1.13019	2.32078	0.588435		2010.41	2010-05-28	2010-05-28T13:03:32	1275051812046	1.8424	1.77048	3.18565	0.966464		2010.72	2010-09-18	2010-09-18T21:18:04	1284844684696	1.36707	1.26726	2.66962	0.674627		2011.38	2011-05-16	2011-05-16T20:11:40	1305576700773	1.29612	1.20371	2.50757	0.623978		2007.74	2007-09-27	2007-09-27T10:49:38	1190890178036	1.65587
[truncated: 19 more columns]

## Sheet: H3N2_2
	Bayesian Skyline: H3_HA_BICEPS_2.log									Bayesian Skyline: H3_MP_BICEPS_2.log									Bayesian Skyline: H3_NA_BICEPS_2.log									Bayesian Skyline: H3_NP_BICEPS_2.log									Bayesian Skyline: H3N2_NS_Combined									Bayesian Skyline: H3_PA_BICEPS_2.log
time	date	datetime	milliseconds	mean	median	upper	lower		time	date	datetime	milliseconds	mean	median	upper	lower		time	date	datetime	milliseconds	mean	median	upper	lower		time	date	datetime	milliseconds	mean	median	upper	lower		time	date	datetime	milliseconds	mean	median	upper	lower		time	date	datetime	milliseconds	mean
2022.73	2022-09-22	2022-09-22T21:48:00	1663883280181	3.98889	3.80361	6.67511	2.21544		2022.73	2022-09-22	2022-09-22T21:48:00	1663883280754	1.83696	1.70654	3.6324	0.775651		2022.73	2022-09-22	2022-09-22T21:48:00	1663883280790	3.45997	3.25851	5.9796	1.69987		2022.73	2022-09-22	2022-09-22T21:48:00	1663883280010	4.14356	3.94	7.11191	2.18523		2022.73	2022-09-22	2022-09-22T21:48:00	1663883280825	3.50004	3.30263	6.87896	1.46891		2022.73	2022-09-22	2022-09-22T21:48:00	1663883280433	4.56248
2022.63	2022-08-18	2022-08-18T23:20:18	1660864818079	3.98889	3.80361	6.67511	2.21544		2022.63	2022-08-17	2022-08-17T15:06:08	1660748768460	1.83696	1.70654	3.6324	0.775651		2022.63	2022-08-17	2022-08-17T08:31:41	1660725101818	3.45997	3.25851	5.9796	1.69987		2022.62	2022-08-14	2022-08-14T15:38:09	1660491489998	4.14356	3.94	7.11191	2.18523		2022.64	2022-08-19	2022-08-19T14:01:05	1660917665343	3.50004	3.30263	6.87896	1.46891		2022.62	2022-08-14	2022-08-14T10:38:47	1660473527312	4.56248
2022.54	2022-07-15	2022-07-15T00:52:35	1657846355977	3.98889	3.80361	6.67511	2.21544		2022.53	2022-07-12	2022-07-12T08:24:16	1657614256167	0.973607	0.821064	3.38651	0.381874		2022.53	2022-07-11	2022-07-11T19:15:22	1657566922846	1.23139	1.18942	2.3085	0.379689		2022.51	2022-07-06	2022-07-06T09:28:19	1657099699986	4.14356	3.94	7.11191	2.18523		2022.54	2022-07-16	2022-07-16T06:14:09	1657952049863	3.50004	3.30263	6.87896	1.46891		2022.51	2022-07-05	2022-07-05T23:29:34	1657063774192	1.7458
2022.44	2022-06-10	2022-06-10T02:24:53	1654827893875	1.30403	1.06752	2.87328	0.543345		2022.43	2022-06-06	2022-06-06T01:42:23	1654479743874	0.530114	0.505531	0.975631	0.231455		2022.43	2022-06-05	2022-06-05T05:59:03	1654408743874	0.616868	0.590503	1.05926	0.325609		2022.41	2022-05-28	2022-05-28T03:18:29	1653707909974	1.22288	0.89992	3.04534	0.460696		2022.45	2022-06-11	2022-06-11T22:27:14	1654986434382	1.15219	0.976913	2.60989	0.45781		2022.41	2022-05-27	2022-05-27T12:20:21	1653654021072	0.732845
2022.35	2022-05-06	2022-05-06T03:57:11	1651809431773	0.942884	0.909212	1.5642	0.522668		2022.33	2022-04-30	2022-04-30T19:00:31	1651345231581	0.530114	0.505531	0.975631	0.231455		2022.33	2022-04-29	2022-04-29T16:42:44	1651250564902	0.616868	0.590503	1.05926	0.325609		2022.3	2022-04-18	2022-04-18T21:08:39	1650316119963	0.858103	0.819122	1.42848	0.455055		2022.35	2022-05-08	2022-05-08T14:40:18	1652020818900	0.750293	0.723475	1.26291	0.413193		2022.3	2022-04-18	2022-04-18T01:11:07	1650244267952	0.732845
2022.25	2022-04-01	2022-04-01T05:29:29	1648790969671	0.942884	0.909212	1.5642	0.522668		2022.23	2022-03-25	2022-03-25T12:18:39	1648210719288	0.530114	0.505531	0.975631	0.231455		2022.23	2022-03-24	2022-03-24T03:26:25	1648092385931	0.616868	0.590503	1.05926	0.325609		2022.19	2022-03-10	2022-03-10T14:58:49	1646924329951	0.856064	0.819122	1.42809	0.455055		2022.26	2022-04-04	2022-04-04T06:53:23	1649055203419	0.750019	0.722643	1.26291	0.413193		2022.19	2022-03-09	2022-03-09T14:01:54	1646834514832	0.732845
2022.16	2022-02-25	2022-02-25T07:01:47	1645772507569	0.942884	0.909212	1.5642	0.522668		2022.13	2022-02-17	2022-02-17T05:36:46	1645076206995	0.530114	0.505531	0.975631	0.231455		2022.13	2022-02-15	2022-02-15T14:10:06	1644934206959	0.616868	0.590503	1.05926	0.325609		2022.08	2022-01-30	2022-01-30T08:48:59	1643532539939	0.856064	0.819122	1.42809	0.455055		2022.17	2022-02-28	2022-02-28T23:06:27	1646089587937	0.750019	0.722643	1.26291	0.413193		2022.08	2022-01-29	2022-01-29T02:52:41	1643424761711	0.732845
2022.06	2022-01-21	2022-01-21T08:34:05	1642754045467	0.942884	0.909212	1.5642	0.522668		2022.03	2022-01-11	2022-01-11T22:54:54	1641941694702	0.530114	0.505531	0.975631	0.231455		2022.03	2022-01-10	2022-01-10T00:53:47	1641776027987	0.616868	0.590503	1.05926	0.325609		2021.98	2021-12-22	2021-12-22T02:39:09	1640140749928	0.856064	0.819122	1.42809	0.455055		2022.07	2022-01-25	2022-01-25T15:19:32	1643123972457	0.750019	0.722643	1.26291	0.413193		2021.97	2021-12-20	2021-12-20T15:43:28	1640015008591	0.732845
2021.96	2021-12-17	2021-12-17T10:06:23	1639735583365	0.942884	0.909212	1.5642	0.522668		2021.93	2021-12-06	2021-12-06T16:13:02	1638807182410	0.530114	0.505531	0.975631	0.231455		2021.93	2021-12-04	2021-12-04T11:37:29	1638617849015	0.616868	0.590503	1.05926	0.325609		2021.87	2021-11-12	2021-11-12T20:29:19	1636748959916	0.856064	0.819122	1.42809	0.455055		2021.98	2021-12-22	2021-12-22T07:32:36	1640158356975	0.750019	0.722643	1.26291	0.413193		2021.87	2021-11-11	2021-11-11T04:34:15	1636605255471	0.732845
2021.87	2021-11-12	2021-11-12T11:38:41	1636717121263	0.942884	0.909212	1.5642	0.522668		2021.84	2021-10-31	2021-10-31T09:31:10	1635672670117	0.530114	0.505531	0.975631	0.231455		2021.83	2021-10-28	2021-10-28T22:21:10	1635459670043	0.616868	0.590503	1.05926	0.325609		2021.76	2021-10-04	2021-10-04T14:19:29	1633357169904	0.856064	0.819122	1.42809	0.455055		2021.88	2021-11-17	2021-11-17T23:45:41	1637192741494	0.750019	0.722643	1.26291	0.413193		2021.76	2021-10-02	2021-10-02T17:25:02	1633195502351	0.732845
2021.77	2021-10-08	2021-10-08T13:10:59	1633698659161	0.942884	0.909212	1.5642	0.522668		2021.74	2021-09-25	2021-09-25T02:49:17	1632538157824	0.530114	0.505531	0.975631	0.231455		2021.73	2021-09-22	2021-09-22T09:04:51	1632301491071	0.616868	0.590503	1.05926	0.325609		2021.65	2021-08-26	2021-08-26T08:09:39	1629965379893	0.856064	0.819122	1.42809	0.455055		2021.79	2021-10-14	2021-10-14T15:58:46	1634227126012	0.750019	0.722643	1.26291	0.413193		2021.65	2021-08-24	2021-08-24T06:15:49	1629785749231	0.732845
2021.68	2021-09-03	2021-09-03T14:43:17	1630680197060	0.942884	0.909212	1.5642	0.522668		2021.64	2021-08-19	2021-08-19T20:07:25	1629403645530	0.530114	0.505531	0.975631	0.231455		2021.63	2021-08-16	2021-08-16T19:48:32	1629143312099	0.616868	0.590503	1.05926	0.325609		2021.55	2021-07-18	2021-07-18T01:59:49	1626573589881	0.856064	0.819122	1.42809	0.455055		2021.7	2021-09-10	2021-09-10T08:11:50	1631261510531	0.750019	0.722643	1.26291	0.413193		2021.54	2021-07-15	2021-07-15T19:06:36	1626375996111	0.732845
2021.58	2021-07-30	2021-07-30T16:15:34	1627661734958	0.942884	0.909212	1.5642	0.522668		2021.54	2021-07-14	2021-07-14T13:25:33	1626269133237	0.530114	0.505531	0.975631	0.231455		2021.53	2021-07-11	2021-07-11T06:32:13	1625985133127	0.616868	0.590503	1.05926	0.325609		2021.44	2021-06-08	2021-06-08T19:49:59	1623181799869	0.856064	0.819122	1.42809	0.455055		2021.6	2021-08-07	2021-08-07T00:24:55	1628295895049	0.750019	0.722643	1.26291	0.413193		2021.43	2021-06-06	2021-06-06T07:57:22	1622966242990	0.732845
2021.49	2021-06-25	2021-06-25T17:47:52	1624643272856	0.942884	0.909212	1.5642	0.522668		2021.44	2021-06-08	2021-06-08T06:43:40	1623134620944	0.530114	0.505531	0.975631	0.231455		2021.43	2021-06-04	2021-06-04T17:15:54	1622826954155	0.616868	0.590503	1.05926	0.325609		2021.33	2021-04-30	2021-04-30T13:40:09	1619790009857	0.856064	0.819122	1.42809	0.455055		2021.51	2021-07-03	2021-07-03T16:37:59	1625330279568	0.750019	0.722643	1.26291	0.413193		2021.32	2021-04-27	2021-04-27T20:48:09	1619556489870	0.732845
2021.39	2021-05-21	2021-05-21T19:20:10	1621624810754	0.942884	0.909212	1.5642	0.522668		2021.34	2021-05-03	2021-05-03T00:01:48	1620000108651	0.530114	0.505531	0.975631	0.231455		2021.33	2021-04-29	2021-04-29T03:59:35	1619668775183	0.616868	0.590503	1.05926	0.325609		2021.22	2021-03-22	2021-03-22T07:30:19	1616398219846	0.856064	0.819122	1.42809	0.455055		2021.41	2021-05-30	2021-05-30T08:51:04	1622364664086	0.750019	0.722643	1.26291	0.413193		2021.22	2021-03-19	2021-03-19T09:38:56	1616146736750	0.732845
2021.29	2021-04-16	2021-04-16T20:52:28	1618606348652	0.942884	0.909212	1.5642	0.522668		2021.24	2021-03-27	2021-03-27T17:19:56	1616865596358	0.530114	0.505531	0.975631	0.231455		2021.23	2021-03-23	2021-03-23T14:43:16	1616510596211	0.616868	0.590503	1.05926	0.325609		2021.12	2021-02-11	2021-02-11T01:20:29	1613006429834	0.856064	0.819122	1.42809	0.455055		2021.32	2021-04-26	2021-04-26T01:04:08	1619399048605	0.750019	0.722643	1.26291	0.413193		2021.11	2021-02-07	2021-02-07T22:29:43	1612736983630	0.732845
2021.2	2021-03-12	2021-03-12T22:24:46	1615587886550	0.942884	0.909212	1.5642	0.522668		2021.14	2021-02-19	2021-02-19T10:38:04	1613731084065	0.530114	0.505531	0.975631	0.231455		2021.13	2021-02-15	2021-02-15T01:26:57	1613352417239	0.616868	0.590503	1.05926	0.325609		2021.01	2021-01-02	2021-01-02T19:10:39	1609614639822	0.856064	0.819122	1.42809	0.455055		2021.23	2021-03-22	2021-03-22T17:17:13	1616433433123	0.750019	0.722643	1.26291	0.413193		2021	2020-12-30	2020-12-30T11:20:30	1609327230510	0.732845
2021.1	2021-02-05	2021-02-05T23:57:04	1612569424448	0.942884	0.909212	1.5642	0.522668		2021.04	2021-01-14	2021-01-14T03:56:11	1610596571772	0.530114	0.505531	0.975631	0.231455		2021.03	2021-01-09	2021-01-09T12:10:38	1610194238268	0.616868	0.590503	1.05926	0.325609		2020.9	2020-11-23	2020-11-23T13:00:49	1606136449811	0.856064	0.819122	1.42809	0.455055		2021.13	2021-02-16	2021-02-16T09:30:17	1613467817642	0.750019	0.722643	1.26291	0.413193		2020.89	2020-11-20	2020-11-20T00:11:17	1605831077389	0.732845
2021.01	2021-01-02	2021-01-02T01:29:22	1609550962346	0.942884	0.909212	1.5642	0.522668		2020.94	2020-12-07	2020-12-07T21:14:19	1607375659479	0.530114	0.505531	0.975631	0.231455		2020.93	2020-12-02	2020-12-02T22:54:19	1606949659296	0.616868	0.590503	1.05926	0.325609		2020.79	2020-10-15	2020-10-15T06:50:59	1602744659799	0.856064	0.819122	1.42809	0.455055		2021.04	2021-01-13	2021-01-13T01:43:22	1610502202160	0.750019	0.722643	1.26291	0.413193		2020.78	2020-10-11	2020-10-11T13:02:04	1602421324269	0.732845
2020.91	2020-11-27	2020-11-27T03:01:40	1606446100244	0.942884	0.909212	1.5642	0.522668		2020.84	2020-11-01	2020-11-01T14:32:27	1604241147186	0.530114	0.505531	0.975631	0.231455		2020.83	2020-10-27	2020-10-27T09:38:00	1603791480324	0.616868	0.590503	1.05926	0.325609		2020.69	2020-09-06	2020-09-06T00:41:09	1599352869789	0.856064	0.819122	1.42809	0.455055		2020.94	2020-12-08	2020-12-08T17:56:26	1607450186679	0.750019	0.722643	1.26291	0.413193		2020.68	2020-09-02	2020-09-02T01:52:51	1599011571155	0.732845
2020.82	2020-10-23	2020-10-23T04:33:58	1603427638142	0.942884	0.909212	1.5642	0.522668		2020.74	2020-09-26	2020-09-26T07:50:34	1601106634894	0.530114	0.505531	0.975631	0.231455		2020.73	2020-09-20	2020-09-20T20:21:41	1600633301352	0.616868	0.590503	1.05926	0.325609		2020.58	2020-07-28	2020-07-28T18:31:19	1595961079778	0.856064	0.819122	1.42809	0.455055		2020.85	2020-11-04	2020-11-04T10:09:31	1604484571197	0.750019	0.722643	1.26291	0.413193		2020.57	2020-07-24	2020-07-24T14:43:38	1595601818035	0.732845
2020.72	2020-09-18	2020-09-18T06:06:16	1600409176040	0.942884	0.909212	1.5642	0.522668		2020.64	2020-08-21	2020-08-21T01:08:42	1597972122601	0.530114	0.505531	0.975631	0.231455		2020.63	2020-08-15	2020-08-15T07:05:22	1597475122380	0.616868	0.590503	1.05926	0.325609		2020.47	2020-06-19	2020-06-19T12:21:29	1592569289766	0.856064	0.819122	1.42809	0.455055		2020.76	2020-10-01	2020-10-01T02:22:35	1601518955715	0.750019	0.722643	1.26291	0.413193		2020.46	2020-06-15	2020-06-15T03:34:24	1592192064915	0.732845
2020.62	2020-08-14	2020-08-14T07:38:33	1597390713939	0.942884	0.909212	1.5642	0.522668		2020.54	2020-07-15	2020-07-15T18:26:50	1594837610307	0.530114	0.505531	0.975631	0.231455		2020.53	2020-07-09	2020-07-09T17:49:03	1594316943408	0.616868	0.590503	1.05926	0.325609		2020.36	2020-05-11	2020-05-11T06:11:39	1589177499754	0.856064	0.819122	1.42809	0.455055		2020.66	2020-08-27	2020-08-27T18:35:40	1598553340234	0.750019	0.722643	1.26291	0.413193		2020.35	2020-05-06	2020-05-06T16:25:11	1588782311795	0.732845
2020.53	2020-07-10	2020-07-10T09:10:51	1594372251837	0.942884	0.909212	1.5642	0.522668		2020.44	2020-06-09	2020-06-09T11:44:58	1591703098014	0.530114	0.505531	0.975631	0.231455		2020.43	2020-06-03	2020-06-03T04:32:44	1591158764436	0.616868	0.590503	1.05926	0.325609		2020.26	2020-04-02	2020-04-02T00:01:49	1585785709742	0.856064	0.819122	1.42809	0.455055		2020.57	2020-07-24	2020-07-24T10:48:44	1595587724752	0.750019	0.722643	1.26291	0.413193		2020.24	2020-03-28	2020-03-28T05:15:58	1585372558674	0.732845
2020.43	2020-06-05	2020-06-05T10:43:09	1591353789735	0.942884	0.909212	1.5642	0.522668		2020.34	2020-05-04	2020-05-04T05:03:05	1588568585721	0.530114	0.505531	0.975631	0.231455		2020.33	2020-04-27	2020-04-27T15:16:25	1588000585464	0.616868	0.590503	1.05926	0.325609		2020.15	2020-02-22	2020-02-22T17:51:59	1582393919731	0.856064	0.819122	1.42809	0.455055		2020.47	2020-06-20	2020-06-20T03:01:49	1592622109271	0.750019	0.722643	1.26291	0.413193		2020.14	2020-02-17	2020-02-17T18:06:45	1581962805554	0.732845
2020.34	2020-05-01	2020-05-01T12:15:27	1588335327633	0.942884	0.909212	1.5642	0.522668		2020.25	2020-03-28	2020-03-28T22:21:13	1585434073428	0.530114	0.505531	0.975631	0.231455		2020.23	2020-03-22	2020-03-22T02:00:06	1584842406492	0.616868	0.590503	1.05926	0.325609		2020.04	2020-01-14	2020-01-14T11:42:09	1579002129719	0.856064	0.819122	1.42809	0.455055		2020.38	2020-05-16	2020-05-16T19:14:53	1589656493789	0.750019	0.722643	1.26291	0.413193		2020.03	2020-01-09	2020-01-09T06:57:32	1578553052434	0.732845
2020.24	2020-03-27	2020-03-27T13:47:45	1585316865531	0.942884	0.909212	1.5642	0.522668		2020.15	2020-02-21	2020-02-21T15:39:21	1582299561135	0.530114	0.505531	0.975631	0.231455		2020.13	2020-02-14	2020-02-14T12:43:47	1581684227520	0.616868	0.590503	1.05926	0.325609		2019.93	2019-12-06	2019-12-06T05:32:19	1575610339707	0.856064	0.819122	1.42809	0.455055		2020.28	2020-04-12	2020-04-12T11:27:58	1586690878308	0.750019	0.722643	1.26291	0.413193		2019.92	2019-11-30	2019-11-30T19:48:19	1575143299314	0.732845
2020.15	2020-02-21	2020-02-21T15:20:03	1582298403429	0.942884	0.909212	1.5642	0.522668		2020.05	2020-01-16	2020-01-16T08:57:28	1579165048843	0.530114	0.505531	0.975631	0.231455		2020.03	2020-01-08	2020-01-08T23:27:28	1578526048548	0.616868	0.590503	1.05926	0.325609		2019.83	2019-10-27	2019-10-27T23:22:29	1572218549696	0.856064	0.819122	1.42809	0.455055		2020.19	2020-03-09	2020-03-09T03:41:02	1583725262826	0.750019	0.722643	1.26291	0.413193		2019.81	2019-10-22	2019-10-22T08:39:06	1571733546194	0.732845
2020.05	2020-01-17	2020-01-17T16:52:21	1579279941327	0.942884	0.909212	1.5642	0.522668		2019.95	2019-12-11	2019-12-11T02:15:36	1576030536550	0.530114	0.505531	0.975631	0.231455		2019.93	2019-12-03	2019-12-03T10:11:09	1575367869576	0.616868	0.590503	1.05926	0.325609		2019.72	2019-09-18	2019-09-18T17:12:39	1568826759684	0.856064	0.819122	1.42809	0.455055		2020.1	2020-02-03	2020-02-03T19:54:07	1580759647345	0.750019	0.722643	1.26291	0.413193		2019.7	2019-09-12	2019-09-12T21:29:53	1568323793073	0.749819
2019.95	2019-12-13	2019-12-13T18:24:39	1576261479225	0.942884	0.909212	1.5642	0.522668		2019.85	2019-11-04	2019-11-04T19:33:44	1572896024257	0.530114	0.505531	0.975631	0.231455		2019.83	2019-10-27	2019-10-27T20:54:50	1572209690604	0.616868	0.590503	1.05926	0.325609		2019.61	2019-08-10	2019-08-10T11:02:49	1565434969672	2.62274	1.0054	10.3448	0.549882		2020	2019-12-31	2019-12-31T12:07:11	1577794031863	0.750019	0.722643	1.26291	0.413193		2019.59	2019-08-04	2019-08-04T10:20:39	1564914039953	7.22405
2019.86	2019-11-08	2019-11-08T19:56:57	1573243017123	0.942884	0.909212	1.5642	0.522668		2019.75	2019-09-29	2019-09-29T12:51:51	1569761511964	0.530114	0.505531	0.975631	0.231455		2019.73	2019-09-21	2019-09-21T07:38:31	1569051511632	0.616868	0.590503	1.05926	0.325609		2019.5	2019-07-02	2019-07-02T04:52:59	1562043179661	7.49492	7.23939	12.273	4.03608		2019.91	2019-11-27	2019-11-27T04:20:16	1574828416382	0.750019	0.722643	1.26291	0.413193		2019.49	2019-06-25	2019-06-25T23:11:26	1561504286833	6.71459
2019.76	2019-10-04	2019-10-04T21:29:15	1570224555021	0.942884	0.909212	1.5642	0.522668		2019.65	2019-08-24	2019-08-24T06:09:59	1566626999671	3.98905	3.86227	7.16334	0.960323		2019.63	2019-08-15	2019-08-15T18:22:12	1565893332660	6.38654	6.12145	10.6549	3.28814		2019.4	2019-05-23	2019-05-23T22:43:09	1558651389649	4.86706	2.95446	12.2718	1.51081		2019.81	2019-10-23	2019-10-23T20:33:20	1571862800900	0.750019	0.722643	1.26291	0.413193		2019.38	2019-05-17	2019-05-17T12:02:13	1558094533713	4.16204
2019.67	2019-08-30	2019-08-30T23:01:32	1567206092919	0.942884	0.909212	1.5642	0.522668		2019.55	2019-07-18	2019-07-18T23:28:07	1563492487378	4.10681	3.90576	7.20263	2.0999		2019.53	2019-07-10	2019-07-10T05:05:53	1562735153688	6.38028	6.12145	10.6549	3.2207		2019.29	2019-04-14	2019-04-14T16:33:19	1555259599637	1.81903	1.29875	4.14207	0.654965		2019.72	2019-09-19	2019-09-19T12:46:25	1568897185419	0.750019	0.722643	1.26291	0.413193		2019.27	2019-04-08	2019-04-08T00:53:00	1554684780593	2.65495
2019.57	2019-07-27	2019-07-27T00:33:50	1564187630818	5.02289	4.82279	8.05535	2.94664		2019.45	2019-06-12	2019-06-12T16:46:15	1560357975084	2.24663	2.06965	4.20432	1.11306		2019.43	2019-06-03	2019-06-03T15:49:34	1559576974717	3.27847	3.14097	5.4021	1.84726		2019.18	2019-03-06	2019-03-06T10:23:29	1551867809626	1.09826	1.04387	1.86483	0.629817		2019.63	2019-08-16	2019-08-16T04:59:29	1565931569937	5.51204	5.39015	12.7735	0.527835		2019.16	2019-02-27	2019-02-27T13:43:47	1551275027473	1.88859
2019.48	2019-06-22	2019-06-22T02:06:08	1561169168716	4.97989	4.81301	8.05535	2.54317		2019.35	2019-05-07	2019-05-07T10:04:22	1557223462791	1.59218	1.38271	3.63162	0.768288		2019.33	2019-04-28	2019-04-28T02:33:15	1556418795747	2.22324	1.80587	5.12432	1.00525		2019.07	2019-01-26	2019-01-26T04:13:39	1548476019615	1.09643	1.04375	1.85468	0.629817		2019.53	2019-07-12	2019-07-12T21:12:34	1562965954456	6.52488	6.14968	12.8997	2.58848		2019.05	2019-01-19	2019-01-19T02:34:34	1547865274352	1.88859
2019.38	2019-05-18	2019-05-18T03:38:26	1558150706614	2.69158	2.61855	4.30005	1.36409		2019.25	2019-04-01	2019-04-01T03:22:30	1554088950498	1.39891	1.33993	2.45049	0.76275		2019.22	2019-03-22	2019-03-22T13:16:56	1553260616775	1.65738	1.59343	2.5918	0.979853		2018.97	2018-12-17	2018-12-17T22:03:49	1545084229603	1.09643	1.04375	1.85468	0.629817		2019.44	2019-06-08	2019-06-08T13:25:38	1560000338974	5.56723	4.94801	12.1723	2.20669		2018.95	2018-12-10	2018-12-10T15:25:21	1544455521232	1.88859
2019.28	2019-04-13	2019-04-13T05:10:44	1555132244512	1.46142	1.27676	3.81945	0.784721		2019.15	2019-02-23	2019-02-23T20:40:38	1550954438205	1.39718	1.33993	2.44621	0.76275		2019.12	2019-02-14	2019-02-14T00:00:37	1550102437803	1.65531	1.59276	2.58681	0.979853		2018.86	2018-11-08	2018-11-08T15:53:59	1541692439591	1.09643	1.04375	1.85468	0.629817		2019.34	2019-05-05	2019-05-05T05:38:43	1557034723493	3.50026	3.37733	6.21409	1.5797		2018.84	2018-11-01	2018-11-01T04:16:08	1541045768112	1.88859
2019.19	2019-03-09	2019-03-09T06:43:02	1552113782410	1.28927	1.24369	2.08995	0.782419		2019.05	2019-01-18	2019-01-18T13:58:45	1547819925912	1.39718	1.33993	2.44621	0.76275		2019.02	2019-01-08	2019-01-08T10:44:18	1546944258831	1.65531	1.59276	2.58681	0.979853		2018.75	2018-09-30	2018-09-30T09:44:09	1538300649580	1.11327	1.06136	1.89997	0.641976		2019.25	2019-03-31	2019-03-31T21:51:48	1554069108011	2.27527	1.89014	5.10945	0.916081		2018.73	2018-09-22	2018-09-22T17:06:54	1537636014994	1.77718
2019.09	2019-02-02	2019-02-02T08:15:20	1549095320308	1.28927	1.24369	2.08995	0.782419		2018.95	2018-12-13	2018-12-13T07:16:53	1544685413619	1.39718	1.33993	2.44621	0.76275		2018.92	2018-12-02	2018-12-02T21:27:59	1543786079859	1.65531	1.59276	2.58681	0.979853		2018.64	2018-08-22	2018-08-22T03:34:19	1534908859568	1.62559	1.57771	2.64838	0.914889		2019.16	2019-02-25	2019-02-25T14:04:52	1551103492530	1.64077	1.541	3.06972	0.870063		2018.62	2018-08-14	2018-08-14T05:57:41	1534226261874	1.7476
2019	2018-12-29	2018-12-29T09:47:38	1546076858206	1.28927	1.24369	2.08995	0.782419		2018.85	2018-11-07	2018-11-07T00:35:01	1541550901326	1.39718	1.33993	2.44621	0.76275		2018.82	2018-10-27	2018-10-27T08:11:40	1540627900887	1.65531	1.59276	2.58681	0.979853		2018.54	2018-07-13	2018-07-13T21:24:29	1531517069556	1.62559	1.57771	2.64838	0.914889		2019.06	2019-01-22	2019-01-22T06:17:57	1548137877048	1.61603	1.5336	2.89732	0.870063		2018.51	2018-07-05	2018-07-05T18:48:28	1530816508753	1.7476
2018.9	2018-11-24	2018-11-24T11:19:56	1543058396104	1.28927	1.24369	2.08995	0.782419		2018.75	2018-10-01	2018-10-01T17:53:09	1538416389033	1.98506	1.89724	3.39736	1.09104		2018.72	2018-09-20	2018-09-20T18:55:21	1537469721915	2.36707	2.30021	3.6227	1.45441		2018.43	2018-06-04	2018-06-04T15:14:39	1528125279545	1.62559	1.57771	2.64838	0.914889		2018.97	2018-12-18	2018-12-18T22:31:01	1545172261567	1.61603	1.5336	2.89732	0.870063		2018.41	2018-05-27	2018-05-27T07:39:15	1527406755633	1.7476
2018.81	2018-10-20	2018-10-20T12:52:14	1540039934002	1.28927	1.24369	2.08995	0.782419		2018.65	2018-08-26	2018-08-26T11:11:16	1535281876740	2.25784	2.18177	3.5109	1.31276		2018.62	2018-08-15	2018-08-15T05:39:02	1534311542943	2.36451	2.29811	3.6227	1.4454		2018.32	2018-04-26	2018-04-26T09:04:49	1524733489533	1.62559	1.57771	2.64838	0.914889		2018.87	2018-11-14	2018-11-14T14:44:06	1542206646085	1.61603	1.5336	2.89732	0.870063		2018.3	2018-04-17	2018-04-17T20:30:02	1523997002513	1.7476
2018.71	2018-09-15	2018-09-15T14:24:31	1537021471900	2.22408	2.17793	3.33972	1.35573		2018.56	2018-07-21	2018-07-21T04:29:24	1532147364447	2.25784	2.18177	3.5109	1.31276		2018.52	2018-07-09	2018-07-09T16:22:43	1531153363971	2.36451	2.29811	3.6227	1.4454		2018.21	2018-03-18	2018-03-18T02:54:59	1521341699521	1.62559	1.57771	2.64838	0.914889		2018.78	2018-10-11	2018-10-11T06:57:10	1539241030603	1.61603	1.5336	2.89732	0.870063		2018.19	2018-03-09	2018-03-09T09:20:49	1520587249393	1.7476
2018.61	2018-08-11	2018-08-11T15:56:49	1534003009798	2.24936	2.19853	3.34195	1.38591		2018.46	2018-06-14	2018-06-14T21:47:32	1529012852154	2.25784	2.18177	3.5109	1.31276		2018.42	2018-06-03	2018-06-03T03:06:24	1527995184999	2.36451	2.29811	3.6227	1.4454		2018.11	2018-02-06	2018-02-06T20:45:09	1517949909509	1.82401	1.62748	4.65199	0.949102		2018.69	2018-09-06	2018-09-06T23:10:15	1536275415122	2.09202	2.00297	3.68159	1.01566		2018.08	2018-01-28	2018-01-28T22:11:36	1517177496273	1.84993
2018.52	2018-07-07	2018-07-07T17:29:07	1530984547697	2.24936	2.19853	3.34195	1.38591		2018.36	2018-05-09	2018-05-09T15:05:39	1525878339860	2.25784	2.18177	3.5109	1.31276		2018.32	2018-04-27	2018-04-27T13:50:06	1524837006027	2.36451	2.29811	3.6227	1.4454		2018	2017-12-29	2017-12-29T14:35:19	1514558119499	2.90295	2.08062	7.1969	1.11751		2018.59	2018-08-03	2018-08-03T15:23:19	1533309799640	2.22588	2.14424	3.7878	1.14958		2017.97	2017-12-20	2017-12-20T11:02:23	1513767743153	3.42681
2018.42	2018-06-02	2018-06-02T19:01:25	1527966085595	2.24936	2.19853	3.34195	1.38591		2018.26	2018-04-03	2018-04-03T08:23:47	1522743827567	2.25784	2.18177	3.5109	1.31276		2018.22	2018-03-22	2018-03-22T00:33:47	1521678827055	2.36451	2.29811	3.6227	1.4454		2017.89	2017-11-20	2017-11-20T08:25:29	1511166329487	4.29151	4.25535	8.04045	1.43571		2018.5	2018-06-30	2018-06-30T07:36:24	1530344184159	2.22588	2.14424	3.7878	1.14958		2017.86	2017-11-10	2017-11-10T23:53:10	1510357990032	5.3458
2018.33	2018-04-28	2018-04-28T20:33:43	1524947623493	2.24936	2.19853	3.34195	1.38591		2018.16	2018-02-26	2018-02-26T01:41:55	1519609315274	2.25784	2.18177	3.5109	1.31276		2018.12	2018-02-13	2018-02-13T11:17:28	1518520648083	2.41954	2.31882	3.93284	1.4728		2017.78	2017-10-12	2017-10-12T02:15:39	1507774539475	4.83865	4.64398	8.33034	2.39665		2018.4	2018-05-26	2018-05-26T23:49:28	1527378568677	2.22588	2.14424	3.7878	1.14958		2017.76	2017-10-02	2017-10-02T12:43:56	1506948236912	5.75901
2018.23	2018-03-24	2018-03-24T22:06:01	1521929161391	2.24936	2.19853	3.34195	1.38591		2018.06	2018-01-20	2018-01-20T19:00:02	1516474802981	2.30226	2.20475	3.70944	1.34143		2018.02	2018-01-07	2018-01-07T22:01:09	1515362469111	2.81555	2.4757	6.62457	1.57567		2017.68	2017-09-02	2017-09-02T20:05:49	1504382749464	4.90669	4.68733	8.37764	2.66469		2018.31	2018-04-22	2018-04-22T16:02:33	1524412953196	2.22588	2.14424	3.7878	1.14958		2017.65	2017-08-24	2017-08-24T01:34:43	1503538483792	5.75901
2018.14	2018-02-17	2018-02-17T23:38:19	1518910699289	2.24936	2.19853	3.34195	1.38591		2017.96	2017-12-15	2017-12-15T12:18:10	1513340290688	2.88584	2.54918	6.32992	1.49209		2017.92	2017-12-02	2017-12-02T08:44:50	1512204290139	4.0268	3.47422	8.12529	1.8045		2017.57	2017-07-25	2017-07-25T13:55:59	1500990959452	4.90669	4.68733	8.37764	2.66469		2018.22	2018-03-19	2018-03-19T08:15:37	1521447337714	2.22753	2.1446	3.7914	1.14958		2017.54	2017-07-15	2017-07-15T14:25:30	1500128730672	2.82282
2018.04	2018-01-14	2018-01-14T01:10:37	1515892237187	2.27678	2.2015	3.42153	1.39698		2017.86	2017-11-09	2017-11-09T05:36:18	1510205778395	4.12019	3.82717	7.54446	1.97153		2017.82	2017-10-26	2017-10-26T19:28:31	1509046111168	5.45495	5.30337	9.0508	2.65471		2017.46	2017-06-16	2017-06-16T07:46:09	1497599169440	3.81941	3.66544	6.38394	2.04816		2018.12	2018-02-13	2018-02-13T00:28:42	1518481722233	2.23804	2.146	3.80972	1.14958		2017.43	2017-06-06	2017-06-06T03:16:17	1496718977552	2.32795
2017.94	2017-12-10	2017-12-10T02:42:55	1512873775085	2.82497	2.32704	7.88321	1.52497		2017.76	2017-10-03	2017-10-03T22:54:26	1507071266102	4.40362	4.17274	7.6751	2.08235		2017.72	2017-09-20	2017-09-20T06:12:12	1505887932196	5.61856	5.41747	9.22947	3.14977		2017.35	2017-05-08	2017-05-08T01:36:19	1494207379429	2.6164	2.47264	4.65719	1.50265		2018.03	2018-01-09	2018-01-09T16:41:46	1515516106751	2.38513	2.17197	5.41531	1.15835		2017.32	2017-04-27	2017-04-27T16:07:04	1493309224431	2.31645
2017.85	2017-11-05	2017-11-05T04:15:12	1509855312983	5.08595	5.19052	9.99662	1.79802		2017.66	2017-08-28	2017-08-28T16:12:33	1503936753809	4.41248	4.19911	7.6751	2.08235		2017.62	2017-08-14	2017-08-14T16:55:53	1502729753224	5.62438	5.41748	9.22947	3.16182		2017.24	2017-03-29	2017-03-29T19:26:29	1490815589417	2.5431	2.45747	4.08565	1.49637		2017.93	2017-12-06	2017-12-06T08:54:51	1512550491270	2.9439	2.38701	7.47604	1.20939		2017.22	2017-03-19	2017-03-19T04:57:51	1489899471311	2.31645
2017.75	2017-10-01	2017-10-01T05:47:30	1506836850881	6.58908	6.44892	10.3603	2.93748		2017.56	2017-07-23	2017-07-23T09:30:41	1500802241516	4.07279	3.83056	7.6751	1.46367		2017.52	2017-07-09	2017-07-09T03:39:34	1499571574252	3.261	3.08884	5.61908	1.81939		2017.14	2017-02-18	2017-02-18T13:16:39	1487423799405	2.5431	2.45747	4.08565	1.49637		2017.84	2017-11-02	2017-11-02T01:07:55	1509584875788	4.06407	3.67246	8.39057	1.31926		2017.11	2017-02-07	2017-02-07T17:48:38	1486489718191	2.31645
2017.66	2017-08-27	2017-08-27T07:19:48	1503818388779	6.73992	6.53396	10.4464	3.98807		2017.46	2017-06-17	2017-06-17T02:48:49	1497667729223	2.83693	2.46234	5.78083	1.3012		2017.42	2017-06-02	2017-06-02T14:23:15	1496413395280	2.51491	2.42797	3.7995	1.52927		2017.03	2017-01-10	2017-01-10T07:06:49	1484032009393	2.5431	2.45747	4.08565	1.49637		2017.75	2017-09-28	2017-09-28T17:21:00	1506619260307	4.7966	4.64601	8.9775	1.70859		2017	2016-12-29	2016-12-29T06:39:25	1482993565071	2.31645
2017.56	2017-07-23	2017-07-23T08:52:06	1500799926677	6.7423	6.53581	10.4464	3.99418		2017.36	2017-05-11	2017-05-11T20:06:56	1494533216930	2.13772	2.06816	3.51873	1.21105		2017.32	2017-04-27	2017-04-27T01:06:56	1493255216308	2.50119	2.42312	3.75701	1.52927		2016.92	2016-12-01	2016-12-01T00:56:59	1480553819382	2.55505	2.46784	4.11597	1.51349		2017.65	2017-08-25	2017-08-25T09:34:04	1503653644825	5.0146	4.85093	9.01198	2.09216		2016.89	2016-11-19	2016-11-19T19:30:11	1479583811951	2.31645
2017.47	2017-06-18	2017-06-18T10:24:24	1497781464576	2.84307	2.72038	4.65226	1.69114		2017.26	2017-04-05	2017-04-05T13:25:04	1491398704636	2.13772	2.06816	3.51873	1.21105		2017.22	2017-03-21	2017-03-21T11:50:37	1490097037336	2.50119	2.42312	3.75701	1.52927		2016.81	2016-10-22	2016-10-22T18:47:09	1477162029370	2.87855	2.70456	5.10888	1.67698		2017.56	2017-07-22	2017-07-22T01:47:09	1500688029344	5.00163	4.84283	8.99555	2.0226		2016.78	2016-10-11	2016-10-11T08:20:58	1476174058831	3.90111
2017.37	2017-05-14	2017-05-14T11:56:42	1494763002474	3.07297	2.98584	4.70404	1.95193		2017.16	2017-02-28	2017-02-28T06:43:12	1488264192343	2.13772	2.06816	3.51873	1.21105		2017.12	2017-02-12	2017-02-12T22:34:18	1486938858364	2.50119	2.42312	3.75701	1.52927		2016.71	2016-09-13	2016-09-13T12:37:19	1473770239358	3.74553	3.57577	6.21331	2.0163		2017.46	2017-06-17	2017-06-17T18:00:13	1497722413862	2.15501	1.94264	4.45533	0.908683		2016.68	2016-09-01	2016-09-01T21:11:45	1472764305710	2.41772
2017.27	2017-04-09	2017-04-09T13:29:00	1491744540372	3.07297	2.98584	4.70404	1.95193		2017.06	2017-01-23	2017-01-23T00:01:20	1485129680050	2.13772	2.06816	3.51873	1.21105		2017.02	2017-01-07	2017-01-07T09:17:59	1483780679392	2.50119	2.42312	3.75701	1.52927		2016.6	2016-08-05	2016-08-05T06:27:29	1470378449347	3.03747	2.88144	5.33581	1.59313		2017.37	2017-05-14	2017-05-14T10:13:18	1494756798381	1.44175	1.38032	2.56953	0.773834		2016.57	2016-07-24	2016-07-24T10:02:32	1469354552591	3.17546
2017.18	2017-03-05	2017-03-05T15:01:18	1488726078270	3.07297	2.98584	4.70404	1.95193		2016.97	2016-12-16	2016-12-16T17:19:27	1481908767757	2.15934	2.08106	3.56713	1.25191		2016.92	2016-11-30	2016-11-30T20:01:40	1480536100420	2.50119	2.42312	3.75701	1.52927		2016.49	2016-06-27	2016-06-27T00:17:39	1466986659335	3.35819	3.24187	5.23506	2.01984		2017.28	2017-04-10	2017-04-10T02:26:22	1491791182899	1.43688	1.3802	2.49896	0.773834		2016.46	2016-06-14	2016-06-14T22:53:19	1465944799471	3.23131
2017.08	2017-01-29	2017-01-29T16:33:36	1485707616168	3.07297	2.98584	4.70404	1.95193		2016.87	2016-11-10	2016-11-10T10:37:35	1478774255464	2.31807	2.21788	3.89989	1.35088		2016.82	2016-10-25	2016-10-25T06:45:21	1477377921448	4.34611	4.17741	7.2407	2.48799		2016.38	2016-05-18	2016-05-18T18:07:49	1463594869323	3.10963	3.01811	4.88319	1.88805		2017.18	2017-03-06	2017-03-06T18:39:27	1488825567418	1.43688	1.3802	2.49896	0.773834		2016.35	2016-05-06	2016-05-06T11:44:06	1462535046351	3.22964
2016.99	2016-12-24	2016-12-24T18:05:54	1482602754082	3.07297	2.98584	4.70404	1.95193		2016.77	2016-10-05	2016-10-05T03:55:43	1475639743171	2.89556	2.75971	5.43032	1.34599		2016.72	2016-09-18	2016-09-18T17:29:02	1474219742476	4.38723	4.22887	7.26262	2.45002		2016.28	2016-04-09	2016-04-09T11:57:59	1460203079312	3.10484	3.01331	4.86376	1.88805		2017.09	2017-01-31	2017-01-31T10:52:31	1485859951936	1.43927	1.38032	2.51299	0.773834		2016.24	2016-03-28	2016-03-28T00:34:53	1459125293231	3.22964
2016.89	2016-11-19	2016-11-19T19:38:11	1479584291980	3.07297	2.98584	4.70404	1.95193		2016.67	2016-08-29	2016-08-29T21:13:50	1472505230878	1.8052	1.59377	4.74956	0.804175		2016.62	2016-08-13	2016-08-13T04:12:43	1471061563504	3.49298	3.35864	5.83585	1.81021		2016.17	2016-03-01	2016-03-01T05:48:09	1456811289300	3.10484	3.01331	4.86376	1.88805		2016.99	2016-12-27	2016-12-27T03:05:36	1482807936455	1.47804	1.38708	2.74317	0.780109		2016.13	2016-02-17	2016-02-17T13:25:40	1455715540110	3.22964
2016.8	2016-10-15	2016-10-15T21:10:29	1476565829878	3.10641	2.9989	4.91415	1.95553		2016.57	2016-07-24	2016-07-24T14:31:58	1469370718585	1.14071	0.994601	2.93369	0.563507		2016.52	2016-07-07	2016-07-07T14:56:24	1467903384532	2.87554	2.49318	5.82701	1.49982		2016.06	2016-01-21	2016-01-21T23:38:19	1453419499288	3.10484	3.01331	4.86376	1.88805		2016.9	2016-11-22	2016-11-22T19:18:40	1479842320973	1.66763	1.46444	3.88523	0.793571		2016.03	2016-01-09	2016-01-09T02:16:26	1452305786990	3.22964
2016.7	2016-09-10	2016-09-10T22:42:47	1473547367776	6.42841	6.24463	10.1908	3.72579		2016.47	2016-06-18	2016-06-18T07:50:06	1466236206292	1.02318	0.980163	1.72036	0.563507		2016.42	2016-06-01	2016-06-01T01:40:05	1464745205560	2.33355	2.27584	3.55959	1.47765		2015.95	2015-12-13	2015-12-13T17:28:29	1450027709276	3.10484	3.01331	4.86376	1.88805		2016.81	2016-10-19	2016-10-19T11:31:45	1476876705491	2.56021	2.38638	5.34128	0.92942		2015.92	2015-11-30	2015-11-30T15:07:13	1448896033870	3.22964
2016.6	2016-08-07	2016-08-07T00:15:05	1470528905674	5.35592	4.80184	10.1908	2.27334		2016.37	2016-05-13	2016-05-13T01:08:13	1463101693999	1.02318	0.980163	1.72036	0.563507		2016.32	2016-04-25	2016-04-25T12:23:46	1461587026588	2.33355	2.27584	3.55959	1.47765		2015.85	2015-11-04	2015-11-04T11:18:39	1446635919265	3.10484	3.01331	4.86376	1.88805		2016.71	2016-09-15	2016-09-15T03:44:50	1473911090010	3.04058	2.86888	5.69708	1.3712		2015.81	2015-10-22	2015-10-22T03:58:00	1445486280750	3.22964
2016.51	2016-07-03	2016-07-03T01:47:23	1467510443572	3.76172	3.61279	6.28491	2.21656		2016.27	2016-04-06	2016-04-06T18:26:21	1459967181706	1.02318	0.980163	1.72036	0.563507		2016.22	2016-03-19	2016-03-19T23:07:27	1458428847616	2.33355	2.27584	3.55959	1.47765		2015.74	2015-09-26	2015-09-26T05:08:49	1443244129253	3.10484	3.01331	4.86376	1.88805		2016.62	2016-08-11	2016-08-11T19:57:54	1470945474528	2.79584	2.6762	5.04319	1.33886		2015.7	2015-09-12	2015-09-12T16:48:47	1442076527630	3.52929
2016.41	2016-05-29	2016-05-29T03:19:41	1464491981471	3.05075	2.88205	5.58255	1.77197		2016.17	2016-03-01	2016-03-01T11:44:29	1456832669412	1.02318	0.980163	1.72036	0.563507		2016.12	2016-02-12	2016-02-12T09:51:08	1455270668645	2.33355	2.27584	3.55959	1.47765		2015.63	2015-08-17	2015-08-17T22:58:59	1439852339241	2.84741	2.80185	5.15778	1.07949		2016.52	2016-07-08	2016-07-08T12:10:59	1467979859047	2.3293	2.16641	4.56351	1.00165		2015.59	2015-08-04	2015-08-04T05:39:34	1438666774510	1.65122
2016.32	2016-04-24	2016-04-24T04:51:59	1461473519369	2.9001	2.82921	4.58965	1.73698		2016.07	2016-01-25	2016-01-25T05:02:37	1453698157119	1.02318	0.980163	1.72036	0.563507		2016.02	2016-01-06	2016-01-06T20:34:49	1452112489673	2.33355	2.27584	3.55959	1.47765		2015.52	2015-07-09	2015-07-09T16:49:09	1436460549230	2.31053	2.19589	4.19525	1.12538		2016.43	2016-06-04	2016-06-04T04:24:03	1465014243565	1.6973	1.61212	3.01772	0.888949		2015.49	2015-06-25	2015-06-25T18:30:21	1435257021389	1.13476
2016.22	2016-03-20	2016-03-20T06:24:17	1458455057267	2.8956	2.82866	4.56199	1.73698		2015.97	2015-12-19	2015-12-19T22:20:44	1450563644826	1.02318	0.980163	1.72036	0.563507		2015.92	2015-12-01	2015-12-01T07:18:30	1448954310701	2.33355	2.27584	3.55959	1.47765		2015.42	2015-05-31	2015-05-31T10:39:19	1433068759218	1.87625	1.68079	3.82233	0.897736		2016.34	2016-04-30	2016-04-30T20:37:08	1462048628084	1.66912	1.58606	2.93671	0.883434		2015.38	2015-05-17	2015-05-17T07:21:08	1431847268269	1.10789
2016.13	2016-02-14	2016-02-14T07:56:35	1455436595165	2.8956	2.82866	4.56199	1.73698		2015.87	2015-11-13	2015-11-13T15:38:52	1447429132533	1.02318	0.980163	1.72036	0.563507		2015.82	2015-10-25	2015-10-25T18:02:11	1445796131729	2.33355	2.27584	3.55959	1.47765		2015.31	2015-04-22	2015-04-22T04:29:29	1429676969206	1.7026	1.62399	2.94211	0.875533		2016.24	2016-03-27	2016-03-27T12:50:12	1459083012602	1.66852	1.58551	2.93671	0.883434		2015.27	2015-04-07	2015-04-07T20:11:55	1428437515149	1.10789
2016.03	2016-01-10	2016-01-10T09:28:53	1452418133063	2.8956	2.82866	4.56199	1.73698		2015.77	2015-10-08	2015-10-08T08:57:00	1444294620240	1.02318	0.980163	1.72036	0.563507		2015.72	2015-09-19	2015-09-19T04:45:52	1442637952757	2.53433	2.39973	4.46765	1.53552		2015.2	2015-03-13	2015-03-13T22:19:39	1426285179195	1.70045	1.62399	2.93111	0.875533		2016.15	2016-02-22	2016-02-22T05:03:17	1456117397121	1.66852	1.58551	2.93671	0.883434		2015.16	2015-02-27	2015-02-27T09:02:42	1425027762029	1.10789
2015.93	2015-12-06	2015-12-06T11:01:10	1449399670961	2.8956	2.82866	4.56199	1.73698		2015.67	2015-09-02	2015-09-02T02:15:07	1441160107947	0.972062	0.898904	1.97387	0.42198		2015.62	2015-08-13	2015-08-13T15:29:33	1439479773785	2.56344	2.09529	5.8333	0.942956		2015.09	2015-02-02	2015-02-02T16:09:49	1422893389183	1.70045	1.62399	2.93111	0.875533		2016.05	2016-01-18	2016-01-18T21:16:21	1453151781639	1.66852	1.58551	2.93671	0.883434		2015.05	2015-01-18	2015-01-18T21:53:28	1421618008909	1.10789
2015.84	2015-11-01	2015-11-01T12:33:28	1446381208859	2.8956	2.82866	4.56199	1.73698		2015.57	2015-07-27	2015-07-27T19:33:15	1438025595654	0.827424	0.703769	1.81979	0.30731		2015.52	2015-07-08	2015-07-08T02:13:14	1436321594813	1.46706	1.17044	3.27044	0.676477		2014.99	2014-12-25	2014-12-25T09:59:59	1419501599171	1.70045	1.62399	2.93111	0.875533		2015.96	2015-12-15	2015-12-15T13:29:26	1450186166158	1.66852	1.58551	2.93671	0.883434		2014.95	2014-12-10	2014-12-10T10:44:15	1418208255788	1.10789
2015.74	2015-09-27	2015-09-27T14:05:46	1443362746757	2.8956	2.82866	4.56199	1.73698		2015.47	2015-06-21	2015-06-21T12:51:23	1434891083361	0.61457	0.582275	1.12088	0.306493		2015.42	2015-06-01	2015-06-01T12:56:55	1433163415841	1.07674	1.03394	1.72348	0.660472		2014.88	2014-11-16	2014-11-16T03:50:09	1416109809159	1.70045	1.62399	2.93111	0.875533		2015.87	2015-11-11	2015-11-11T05:42:30	1447220550676	1.66852	1.58551	2.93671	0.883434		2014.84	2014-10-31	2014-10-31T23:35:02	1414798502668	1.10789
2015.65	2015-08-23	2015-08-23T15:38:04	1440344284655	3.35411	3.22281	6.40912	1.21161		2015.37	2015-05-16	2015-05-16T06:09:31	1431756571068	0.61457	0.582275	1.12088	0.306493		2015.32	2015-04-25	2015-04-25T23:40:36	1430005236869	1.07674	1.03394	1.72348	0.660472		2014.77	2014-10-07	2014-10-07T21:40:19	1412718019148	1.70045	1.62399	2.93111	0.875533		2015.77	2015-10-07	2015-10-07T21:55:35	1444254935195	1.66852	1.58551	2.93671	0.883434		2014.73	2014-09-22	2014-09-22T12:25:49	1411388749548	1.57412
2015.55	2015-07-19	2015-07-19T17:10:22	1437325822553	2.91487	2.43494	6.74534	1.23325		2015.28	2015-04-09	2015-04-09T23:27:38	1428622058775	0.61457	0.582275	1.12088	0.306493		2015.22	2015-03-20	2015-03-20T10:24:17	1426847057897	1.07674	1.03394	1.72348	0.660472		2014.66	2014-08-29	2014-08-29T15:30:29	1409326229136	1.16493	1.11171	1.96903	0.652067		2015.68	2015-09-03	2015-09-03T14:08:39	1441289319713	1.67264	1.58488	2.95304	0.883434		2014.62	2014-08-14	2014-08-14T01:16:36	1407978996428	1.57412
2015.46	2015-06-14	2015-06-14T18:42:40	1434307360451	1.87286	1.64373	3.7296	0.798774		2015.18	2015-03-04	2015-03-04T16:45:46	1425487546482	0.61457	0.582275	1.12088	0.306493		2015.12	2015-02-11	2015-02-11T21:07:58	1423688878925	1.07674	1.03394	1.72348	0.660472		2014.56	2014-07-21	2014-07-21T09:20:39	1405934439124	1.17751	1.11418	2.03586	0.664439		2015.58	2015-07-31	2015-07-31T06:21:44	1438323704232	2.00382	1.83808	4.02808	0.815928		2014.51	2014-07-05	2014-07-05T14:07:23	1404569243308	1.57412
2015.36	2015-05-10	2015-05-10T20:14:58	1431288898350	1.38095	1.32821	2.28248	0.774798		2015.08	2015-01-27	2015-01-27T10:03:54	1422353034188	0.61457	0.582275	1.12088	0.306493		2015.02	2015-01-06	2015-01-06T07:51:39	1420530699953	1.07674	1.03394	1.72348	0.660472		2014.45	2014-06-12	2014-06-12T03:10:49	1402542649115	2.11695	1.32171	6.97139	0.746069		2015.49	2015-06-26	2015-06-26T22:34:48	1435358088750	1.4028	1.34954	2.52368	0.689103		2014.4	2014-05-27	2014-05-27T02:58:10	1401159490188	1.58013
2015.26	2015-04-05	2015-04-05T21:47:16	1428270436248	1.38095	1.32821	2.28248	0.774798		2014.98	2014-12-22	2014-12-22T03:22:01	1419218521895	0.61457	0.582275	1.12088	0.306493		2014.92	2014-11-30	2014-11-30T18:35:20	1417372520981	1.07674	1.03394	1.72348	0.660472		2014.34	2014-05-03	2014-05-03T21:00:59	1399150859103	4.11654	4.18754	8.29395	1.02028		2015.39	2015-05-23	2015-05-23T14:47:53	1432392473269	1.43295	1.37038	2.42084	0.792158		2014.3	2014-04-17	2014-04-17T15:48:57	1397749737067	1.60256
2015.17	2015-03-01	2015-03-01T23:19:34	1425251974146	1.38095	1.32821	2.28248	0.774798		2014.88	2014-11-15	2014-11-15T20:40:09	1416084009602	0.61457	0.582275	1.12088	0.306493		2014.82	2014-10-25	2014-10-25T05:19:02	1414214342009	1.08462	1.037	1.74034	0.67079		2014.23	2014-03-25	2014-03-25T14:51:09	1395759069091	4.8792	4.72913	8.58837	1.45709		2015.3	2015-04-19	2015-04-19T07:00:57	1429426857787	1.43302	1.37038	2.42084	0.792158		2014.19	2014-03-09	2014-03-09T04:39:43	1394339983947	3.32087
2015.07	2015-01-26	2015-01-26T00:51:52	1422233512044	1.38095	1.32821	2.28248	0.774798		2014.78	2014-10-10	2014-10-10T13:58:17	1412949497309	0.800698	0.748539	1.45598	0.405055		2014.72	2014-09-18	2014-09-18T16:02:43	1411056163037	1.45523	1.41234	2.29615	0.837529		2014.13	2014-02-14	2014-02-14T08:41:19	1392367279080	5.07896	4.85139	8.69198	2.50645		2015.21	2015-03-15	2015-03-15T23:14:02	1426461242306	1.43302	1.37038	2.42084	0.792158		2014.08	2014-01-28	2014-01-28T17:30:30	1390930230827	4.01151
2014.98	2014-12-22	2014-12-22T02:24:09	1419215049942	1.38095	1.32821	2.28248	0.774798		2014.68	2014-09-04	2014-09-04T07:16:25	1409814985016	0.869143	0.818843	1.61913	0.412295		2014.62	2014-08-13	2014-08-13T02:46:24	1407897984065	1.45523	1.41234	2.29615	0.837529		2014.02	2014-01-06	2014-01-06T02:31:29	1388975489068	5.1008	4.85983	8.71393	2.57663		2015.11	2015-02-09	2015-02-09T15:27:06	1423495626824	1.43302	1.37038	2.42084	0.792158		2013.97	2013-12-20	2013-12-20T06:21:17	1387520477707	4.04716
2014.88	2014-11-17	2014-11-17T03:56:27	1416196587840	1.38095	1.32821	2.28248	0.774798		2014.58	2014-07-30	2014-07-30T00:34:32	1406680472723	0.914223	0.832698	1.8119	0.44184		2014.52	2014-07-07	2014-07-07T13:30:05	1404739805094	1.45523	1.41234	2.29615	0.837529		2013.91	2013-11-27	2013-11-27T20:21:39	1385583699056	5.10647	4.86665	8.74233	2.57722		2015.02	2015-01-06	2015-01-06T07:40:11	1420530011343	1.43302	1.37038	2.42084	0.792158		2013.86	2013-11-10	2013-11-10T19:12:04	1384110724587	4.04716
2014.79	2014-10-13	2014-10-13T05:28:45	1413178125738	1.38095	1.32821	2.28248	0.774798		2014.48	2014-06-23	2014-06-23T17:52:40	1403545960430	1.1541	0.964961	3.00169	0.526892		2014.42	2014-06-01	2014-06-01T00:13:46	1401581626122	1.45854	1.41254	2.32977	0.845156		2013.8	2013-10-19	2013-10-19T14:11:49	1382191909045	5.10647	4.86665	8.74233	2.57722		2014.92	2014-12-02	2014-12-02T23:53:15	1417564395861	1.43302	1.37038	2.42084	0.792158		2013.76	2013-10-02	2013-10-02T08:02:51	1380700971466	2.51719
2014.69	2014-09-08	2014-09-08T07:01:03	1410159663636	1.13506	1.09708	1.9082	0.576754		2014.38	2014-05-18	2014-05-18T11:10:48	1400411448137	1.5284	1.27475	3.67957	0.621002		2014.32	2014-04-25	2014-04-25T10:57:27	1398423447150	1.46696	1.41312	2.33399	0.8456		2013.7	2013-09-10	2013-09-10T08:01:59	1378800119033	2.31756	2.04068	7.92379	0.549089		2014.83	2014-10-29	2014-10-29T16:06:20	1414598780379	1.43302	1.37038	2.42084	0.792158		2013.65	2013-08-23	2013-08-23T20:53:38	1377291218346	1.4693
2014.59	2014-08-04	2014-08-04T08:33:21	1407141201534	1.13438	1.09708	1.90631	0.576754		2014.28	2014-04-12	2014-04-12T04:28:55	1397276935844	1.80008	1.59546	3.87389	0.696768		2014.22	2014-03-19	2014-03-19T21:41:08	1395265268178	3.57305	2.29235	8.75751	0.956093		2013.59	2013-08-02	2013-08-02T01:52:09	1375408329021	0.766994	0.732079	1.26066	0.415939		2014.74	2014-09-25	2014-09-25T08:19:24	1411633164898	1.41343	1.35587	2.42084	0.704417		2013.54	2013-07-15	2013-07-15T09:44:25	1373881465226	1.4693
2014.5	2014-06-30	2014-06-30T10:05:39	1404122739432	1.20701	1.1121	2.29071	0.608472		2014.18	2014-03-06	2014-03-06T21:47:03	1394142423551	1.96395	1.80922	3.96631	0.778727		2014.12	2014-02-11	2014-02-11T08:24:49	1392107089206	5.42892	5.37208	9.60672	1.45245		2013.48	2013-06-23	2013-06-23T19:42:19	1372016539009	0.764024	0.732079	1.25923	0.415939		2014.64	2014-08-22	2014-08-22T00:32:29	1408667549416	0.772833	0.729062	1.41811	0.352418		2013.43	2013-06-05	2013-06-05T22:35:12	1370471712106	1.4693
2014.4	2014-05-26	2014-05-26T11:37:57	1401104277331	1.44449	1.16556	4.93324	0.684845		2014.08	2014-01-29	2014-01-29T15:05:11	1391007911257	2.00079	1.84148	3.9741	0.79361		2014.02	2014-01-05	2014-01-05T19:08:30	1388948910234	5.70689	5.52897	9.695	2.68759		2013.37	2013-05-15	2013-05-15T13:32:28	1368624748998	0.764024	0.732079	1.25923	0.415939		2014.55	2014-07-18	2014-07-18T16:45:33	1405701933935	0.870241	0.744812	2.85115	0.352418		2013.32	2013-04-27	2013-04-27T11:25:58	1367061958986	1.4693
2014.31	2014-04-21	2014-04-21T13:10:15	1398085815229	1.63935	1.21115	5.48224	0.704825		2013.98	2013-12-24	2013-12-24T08:23:18	1387873398964	2.00755	1.84684	3.9741	0.79361		2013.92	2013-11-30	2013-11-30T05:52:11	1385790731262	5.74722	5.54567	9.695	2.85931		2013.27	2013-04-06	2013-04-06T07:22:38	1365232958986	0.764024	0.732079	1.25923	0.415939		2014.45	2014-06-14	2014-06-14T08:58:38	1402736318453	1.62757	0.902395	5.71164	0.383422		2013.22	2013-03-19	2013-03-19T00:16:45	1363652205866	1.4693
2014.21	2014-03-17	2014-03-17T14:42:33	1395067353127	1.76751	1.24299	5.58803	0.71836		2013.88	2013-11-18	2013-11-18T01:41:26	1384738886671	2.00755	1.84684	3.9741	0.79361		2013.82	2013-10-24	2013-10-24T16:35:52	1382632552290	5.743	5.54567	9.695	2.8977		2013.16	2013-02-26	2013-02-26T01:12:48	1361841168974	0.764024	0.732079	1.25923	0.415939		2014.36	2014-05-11	2014-05-11T01:11:42	1399770702972	2.54382	2.38095	6.71044	0.418836		2013.11	2013-02-07	2013-02-07T13:07:32	1360242452745	1.4693
2014.12	2014-02-10	2014-02-10T16:14:51	1392048891025	2.90842	2.5847	6.76543	0.792351		2013.78	2013-10-12	2013-10-12T18:59:34	1381604374378	1.6688	1.34949	3.98701	0.570338		2013.72	2013-09-18	2013-09-18T03:19:33	1379474373318	1.66444	1.05937	4.41765	0.523669		2013.05	2013-01-17	2013-01-17T19:02:58	1358449378963	0.764024	0.732079	1.25923	0.415939		2014.27	2014-04-06	2014-04-06T17:24:47	1396805087490	3.14061	2.99684	7.14124	0.55735		2013	2012-12-29	2012-12-29T01:58:19	1356746299625	1.4693
2014.02	2014-01-06	2014-01-06T17:47:08	1389030428923	4.07889	3.98495	7.51734	1.12829		2013.69	2013-09-06	2013-09-06T12:17:42	1378469862085	0.564038	0.521702	1.05437	0.285013		2013.62	2013-08-12	2013-08-12T14:03:14	1376316194346	0.945892	0.893974	1.6228	0.515173		2012.94	2012-12-08	2012-12-08T12:53:08	1354971188951	0.764024	0.732079	1.25923	0.415939		2014.17	2014-03-03	2014-03-03T09:37:52	1393839472009	3.40547	3.2022	7.30132	0.786356		2012.89	2012-11-19	2012-11-19T14:49:06	1353336546505	1.4693
2013.92	2013-12-02	2013-12-02T19:19:26	1386011966821	4.29059	4.14591	7.67234	1.99336		2013.59	2013-08-01	2013-08-01T05:35:49	1375335349792	0.55891	0.521702	1.02373	0.285013		2013.52	2013-07-07	2013-07-07T00:46:55	1373158015374	0.945892	0.893974	1.6228	0.515173		2012.84	2012-10-30	2012-10-30T06:43:18	1351579398939	0.764024	0.732079	1.25923	0.415939		2014.08	2014-01-28	2014-01-28T01:50:56	1390873856527	3.47697	3.25425	7.32756	1.12046		2012.78	2012-10-11	2012-10-11T03:39:53	1349926793385	1.4693
2013.83	2013-10-28	2013-10-28T20:51:44	1382993504719	4.32761	4.16389	7.68714	2.10462		2013.49	2013-06-25	2013-06-25T22:53:57	1372200837499	0.55891	0.521702	1.02373	0.285013		2013.42	2013-05-31	2013-05-31T11:30:36	1369999836402	0.945892	0.893974	1.6228	0.515173		2012.73	2012-09-21	2012-09-21T00:33:28	1348187608928	0.764024	0.732079	1.25923	0.415939		2013.98	2013-12-24	2013-12-24T18:04:01	1387908241046	3.51897	3.28098	7.32756	1.42862		2012.67	2012-09-01	2012-09-01T16:30:40	1346517040268	1.4693
2013.73	2013-09-23	2013-09-23T22:24:02	1379975042617	3.64907	3.38121	7.67234	1.1507		2013.39	2013-05-20	2013-05-20T16:12:05	1369066325206	0.55891	0.521702	1.02373	0.285013		2013.32	2013-04-24	2013-04-24T22:14:17	1366841657430	0.945892	0.893974	1.6228	0.515173		2012.62	2012-08-12	2012-08-12T18:23:38	1344795818916	0.764024	0.732079	1.25923	0.415939		2013.89	2013-11-20	2013-11-20T10:17:05	1384942625564	3.53207	3.2905	7.32756	1.47856		2012.57	2012-07-24	2012-07-24T05:21:27	1343107287147	1.4693
2013.64	2013-08-19	2013-08-19T23:56:20	1376956580515	0.82001	0.748469	1.47712	0.418164		2013.29	2013-04-14	2013-04-14T09:30:12	1365931812913	0.55891	0.521702	1.02373	0.285013		2013.22	2013-03-19	2013-03-19T08:57:58	1363683478458	0.945892	0.893974	1.6228	0.515173		2012.51	2012-07-04	2012-07-04T12:13:48	1341404028904	0.764024	0.732079	1.25923	0.415939		2013.8	2013-10-17	2013-10-17T02:30:10	1381977010083	3.53495	3.29149	7.32756	1.48342		2012.46	2012-06-14	2012-06-14T18:12:14	1339697534027	1.4693
2013.54	2013-07-16	2013-07-16T01:28:38	1373938118413	0.780399	0.747694	1.28119	0.418164		2013.19	2013-03-09	2013-03-09T02:48:20	1362797300620	0.55891	0.521702	1.02373	0.285013		2013.12	2013-02-10	2013-02-10T19:41:39	1360525299486	0.946384	0.894553	1.6228	0.515173		2012.4	2012-05-26	2012-05-26T06:03:58	1338012238892	0.764024	0.732079	1.25923	0.415939		2013.7	2013-09-12	2013-09-12T18:43:14	1379011394601	2.20123	2.07194	4.20021	0.665441		2012.35	2012-05-06	2012-05-06T07:03:00	1336287780907	1.46989
2013.45	2013-06-11	2013-06-11T03:00:56	1370919656315	0.780399	0.747694	1.28119	0.418164		2013.09	2013-01-31	2013-01-31T20:06:28	1359662788327	0.559138	0.521702	1.02373	0.285013		2013.02	2013-01-05	2013-01-05T06:25:20	1357367120514	0.946384	0.894553	1.6228	0.515173		2012.3	2012-04-16	2012-04-16T23:54:08	1334620448881	0.764326	0.732623	1.25969	0.415939		2013.61	2013-08-09	2013-08-09T10:56:19	1376045779120	0.79318	0.73048	1.55598	0.372263		2012.24	2012-03-27	2012-03-27T19:53:47	1332878027787	1.47094
2013.35	2013-05-07	2013-05-07T04:33:14	1367901194214	0.78084	0.747811	1.28119	0.418512		2012.99	2012-12-25	2012-12-25T13:24:36	1356441876033	0.559434	0.523054	1.02373	0.285013		2012.92	2012-11-28	2012-11-28T17:09:01	1354122541543	0.946936	0.894553	1.66319	0.515173		2012.19	2012-03-08	2012-03-08T17:44:18	1331228658870	0.765482	0.734446	1.25969	0.415939		2013.51	2013-07-06	2013-07-06T03:09:23	1373080163645	0.769702	0.723424	1.41013	0.371425		2012.13	2012-02-17	2012-02-17T08:44:34	1329468274667	1.47272
[truncated: 19 more columns]

## Sheet: H3N2_3
	Bayesian Skyline: H3_HA_BICEPS_3.log									Bayesian Skyline: H3_MP_BICEPS_3R.log									Bayesian Skyline: H3_NA_BICEPS_3.log									Bayesian Skyline: Combined									Bayesian Skyline: H3N2_NS_Combined									Bayesian Skyline: H3_PA_BICEPS_3.log
time	date	datetime	milliseconds	mean	median	upper	lower		time	date	datetime	milliseconds	mean	median	upper	lower		time	date	datetime	milliseconds	mean	median	upper	lower		time	date	datetime	milliseconds	mean	median	upper	lower		time	date	datetime	milliseconds	mean	median	upper	lower		time	date	datetime	milliseconds	mean
2022.73	2022-09-22	2022-09-22T21:48:00	1663883280850	2.92128	2.76209	5.39721	1.34865		2022.73	2022-09-22	2022-09-22T21:48:00	1663883280529	2.28531	2.13811	4.68589	0.914277		2022.73	2022-09-22	2022-09-22T21:48:00	1663883280513	2.82293	2.67078	5.05488	1.30695		2022.73	2022-09-22	2022-09-22T21:48:00	1663883280705	2.66707	2.47743	5.42168	1.01222		2022.73	2022-09-22	2022-09-22T21:48:00	1663883280160	2.47373	2.30762	4.95731	0.904301		2022.73	2022-09-22	2022-09-22T21:48:00	1663883280245	4.9646
2022.64	2022-08-19	2022-08-19T06:21:48	1660890108667	2.92128	2.76209	5.39721	1.34865		2022.63	2022-08-16	2022-08-16T08:09:45	1660637385550	2.28531	2.13811	4.68589	0.914277		2022.63	2022-08-16	2022-08-16T12:36:19	1660653379863	2.82293	2.67078	5.05488	1.30695		2022.62	2022-08-14	2022-08-14T04:27:10	1660451230968	2.66707	2.47743	5.42168	1.01222		2022.64	2022-08-19	2022-08-19T11:53:59	1660910039748	2.47373	2.30762	4.95731	0.904301		2022.62	2022-08-14	2022-08-14T10:43:56	1660473836704	4.9646
2022.54	2022-07-15	2022-07-15T14:55:36	1657896936484	1.41634	1.33729	2.51346	0.557089		2022.52	2022-07-09	2022-07-09T18:31:30	1657391490572	2.28531	2.13811	4.68589	0.914277		2022.53	2022-07-10	2022-07-10T03:24:39	1657423479213	2.82293	2.67078	5.05488	1.30695		2022.51	2022-07-05	2022-07-05T11:06:21	1657019181232	1.15888	1.0716	2.27365	0.552514		2022.54	2022-07-16	2022-07-16T01:59:59	1657936799336	2.47373	2.30762	4.95731	0.904301		2022.51	2022-07-05	2022-07-05T23:39:53	1657064393164	3.90486
2022.45	2022-06-10	2022-06-10T23:29:24	1654903764301	0.671178	0.633926	1.11684	0.39128		2022.42	2022-06-02	2022-06-02T04:53:15	1654145595594	1.57873	1.11101	4.68589	0.446062		2022.42	2022-06-02	2022-06-02T18:12:58	1654193578564	2.55332	2.61081	5.05488	0.594808		2022.4	2022-05-26	2022-05-26T17:45:31	1653587131496	0.990157	0.950846	1.69858	0.535663		2022.45	2022-06-11	2022-06-11T16:05:58	1654963558924	2.46149	2.30762	4.95731	0.650386		2022.41	2022-05-27	2022-05-27T12:35:49	1653654949624	0.804264
2022.35	2022-05-07	2022-05-07T08:03:12	1651910592118	0.671178	0.633926	1.11684	0.39128		2022.32	2022-04-25	2022-04-25T15:15:00	1650899700616	0.785049	0.739602	1.4347	0.394515		2022.32	2022-04-26	2022-04-26T09:01:17	1650963677916	0.474484	0.440688	0.861781	0.243286		2022.29	2022-04-17	2022-04-17T00:24:41	1650155081760	0.989913	0.950666	1.69858	0.535663		2022.35	2022-05-08	2022-05-08T06:11:58	1651990318512	0.586565	0.497971	1.83433	0.265674		2022.3	2022-04-18	2022-04-18T01:31:46	1650245506083	0.797269
2022.26	2022-04-02	2022-04-02T16:36:59	1648917419935	0.671178	0.633926	1.11684	0.39128		2022.22	2022-03-19	2022-03-19T01:36:45	1647653805638	0.778094	0.739103	1.38313	0.394515		2022.22	2022-03-19	2022-03-19T23:49:37	1647733777266	0.463132	0.440688	0.820493	0.243286		2022.19	2022-03-08	2022-03-08T07:03:52	1646723032024	0.989913	0.950666	1.69858	0.535663		2022.26	2022-04-03	2022-04-03T20:17:58	1649017078100	0.523052	0.493823	0.969602	0.265674		2022.19	2022-03-09	2022-03-09T14:27:42	1646836062543	0.797269
2022.16	2022-02-27	2022-02-27T01:10:47	1645924247752	0.671178	0.633926	1.11684	0.39128		2022.11	2022-02-09	2022-02-09T11:58:30	1644407910660	0.778094	0.739103	1.38313	0.394515		2022.12	2022-02-10	2022-02-10T14:37:56	1644503876617	0.463132	0.440688	0.820493	0.243286		2022.08	2022-01-27	2022-01-27T13:43:02	1643290982288	0.989913	0.950666	1.69858	0.535663		2022.16	2022-02-28	2022-02-28T10:23:57	1646043837688	0.523052	0.493823	0.969602	0.265674		2022.08	2022-01-29	2022-01-29T03:23:39	1643426619003	0.797269
2022.07	2022-01-23	2022-01-23T09:44:35	1642931075569	0.671178	0.633926	1.11684	0.39128		2022.01	2022-01-02	2022-01-02T22:20:15	1641162015682	0.778094	0.739103	1.38313	0.394515		2022.01	2022-01-04	2022-01-04T05:26:15	1641273975967	0.463132	0.440688	0.820493	0.243286		2021.97	2021-12-18	2021-12-18T20:22:12	1639858932551	0.989913	0.950666	1.69858	0.535663		2022.07	2022-01-25	2022-01-25T00:29:57	1643070597276	0.523052	0.493823	0.969602	0.265674		2021.97	2021-12-20	2021-12-20T16:19:35	1640017175463	0.797269
2021.97	2021-12-19	2021-12-19T18:18:23	1639937903386	0.671178	0.633926	1.11684	0.39128		2021.91	2021-11-26	2021-11-26T08:42:00	1637916120704	0.778094	0.739103	1.38313	0.394515		2021.91	2021-11-27	2021-11-27T20:14:35	1638044075318	0.463132	0.440688	0.820493	0.243286		2021.86	2021-11-09	2021-11-09T03:01:22	1636426882815	0.989913	0.950666	1.69858	0.535663		2021.98	2021-12-21	2021-12-21T14:35:56	1640097356864	0.523052	0.493823	0.969602	0.265674		2021.87	2021-11-11	2021-11-11T05:15:31	1636607731922	0.797269
2021.88	2021-11-15	2021-11-15T02:52:11	1636944731203	0.671178	0.633926	1.11684	0.39128		2021.8	2021-10-19	2021-10-19T19:03:45	1634670225726	0.778094	0.739103	1.38313	0.394515		2021.81	2021-10-21	2021-10-21T11:02:54	1634814174668	0.463132	0.440688	0.820493	0.243286		2021.75	2021-09-30	2021-09-30T09:40:33	1632994833079	0.989913	0.950666	1.69858	0.535663		2021.88	2021-11-17	2021-11-17T04:41:56	1637124116452	0.523052	0.493823	0.969602	0.265674		2021.76	2021-10-02	2021-10-02T18:11:28	1633198288382	0.797269
2021.78	2021-10-11	2021-10-11T11:25:59	1633951559020	0.671178	0.633926	1.11684	0.39128		2021.7	2021-09-12	2021-09-12T05:25:30	1631424330748	0.778094	0.739103	1.38313	0.394515		2021.71	2021-09-14	2021-09-14T01:51:14	1631584274018	0.463132	0.440688	0.820493	0.243286		2021.64	2021-08-21	2021-08-21T16:19:43	1629562783343	0.989913	0.950666	1.69858	0.535663		2021.79	2021-10-13	2021-10-13T18:47:56	1634150876041	0.523052	0.493823	0.969602	0.265674		2021.65	2021-08-24	2021-08-24T07:07:24	1629788844842	0.797269
2021.69	2021-09-06	2021-09-06T19:59:46	1630958386837	0.671178	0.633926	1.11684	0.39128		2021.6	2021-08-05	2021-08-05T15:47:15	1628178435770	0.778094	0.739103	1.38313	0.394515		2021.6	2021-08-07	2021-08-07T16:39:33	1628354373369	0.463132	0.440688	0.820493	0.243286		2021.53	2021-07-12	2021-07-12T22:58:53	1626130733607	0.989913	0.950666	1.69858	0.535663		2021.69	2021-09-09	2021-09-09T08:53:55	1631177635629	0.523052	0.493823	0.969602	0.265674		2021.54	2021-07-15	2021-07-15T20:03:21	1626379401302	0.797269
2021.59	2021-08-03	2021-08-03T04:33:34	1627965214654	0.671178	0.633926	1.11684	0.39128		2021.49	2021-06-29	2021-06-29T02:09:00	1624932540792	0.778094	0.739103	1.38313	0.394515		2021.5	2021-07-01	2021-07-01T07:27:52	1625124472719	0.463132	0.440688	0.820493	0.243286		2021.42	2021-06-03	2021-06-03T05:38:03	1622698683871	0.989913	0.950666	1.69858	0.535663		2021.6	2021-08-05	2021-08-05T22:59:55	1628204395217	0.523052	0.493823	0.969602	0.265674		2021.43	2021-06-06	2021-06-06T08:59:17	1622969957761	0.797269
2021.5	2021-06-29	2021-06-29T13:07:22	1624972042471	0.671178	0.633926	1.11684	0.39128		2021.39	2021-05-22	2021-05-22T12:30:45	1621686645814	0.778094	0.739103	1.38313	0.394515		2021.4	2021-05-24	2021-05-24T22:16:12	1621894572069	0.463132	0.440688	0.820493	0.243286		2021.32	2021-04-24	2021-04-24T12:17:14	1619266634135	0.989913	0.950666	1.69858	0.535663		2021.5	2021-07-02	2021-07-02T13:05:54	1625231154806	0.523052	0.493823	0.969602	0.265674		2021.32	2021-04-27	2021-04-27T21:55:14	1619560514221	0.797269
2021.4	2021-05-25	2021-05-25T21:41:10	1621978870288	0.671178	0.633926	1.11684	0.39128		2021.29	2021-04-14	2021-04-14T22:52:30	1618440750836	0.778094	0.739103	1.38313	0.394515		2021.3	2021-04-17	2021-04-17T13:04:31	1618664671420	0.463132	0.440688	0.820493	0.243286		2021.21	2021-03-15	2021-03-15T18:56:24	1615834584398	0.989913	0.950666	1.69858	0.535663		2021.41	2021-05-29	2021-05-29T03:11:54	1622257914394	0.523052	0.493823	0.969602	0.265674		2021.22	2021-03-19	2021-03-19T10:51:10	1616151070681	0.797269
2021.31	2021-04-21	2021-04-21T06:14:58	1618985698105	0.671178	0.633926	1.11684	0.39128		2021.19	2021-03-08	2021-03-08T09:14:15	1615194855858	0.778094	0.739103	1.38313	0.394515		2021.19	2021-03-11	2021-03-11T03:52:50	1615434770770	0.463132	0.440688	0.820493	0.243286		2021.1	2021-02-04	2021-02-04T01:35:34	1612402534662	0.989913	0.950666	1.69858	0.535663		2021.32	2021-04-24	2021-04-24T17:17:53	1619284673982	0.523052	0.493823	0.969602	0.265674		2021.11	2021-02-07	2021-02-07T23:47:07	1612741627141	0.797269
2021.21	2021-03-17	2021-03-17T14:48:45	1615992525922	0.671178	0.633926	1.11684	0.39128		2021.08	2021-01-29	2021-01-29T19:36:00	1611948960880	0.778094	0.739103	1.38313	0.394515		2021.09	2021-02-01	2021-02-01T18:41:10	1612204870122	0.463132	0.440688	0.820493	0.243286		2020.99	2020-12-25	2020-12-25T08:14:44	1608884084926	0.989913	0.950666	1.69858	0.535663		2021.22	2021-03-21	2021-03-21T07:23:53	1616311433570	0.523052	0.493823	0.969602	0.265674		2021	2020-12-30	2020-12-30T12:43:03	1609332183600	0.797269
2021.12	2021-02-10	2021-02-10T23:22:33	1612999353740	0.671178	0.633926	1.11684	0.39128		2020.98	2020-12-22	2020-12-22T05:57:45	1608616665902	0.778094	0.739103	1.38313	0.394515		2020.99	2020-12-25	2020-12-25T09:29:29	1608888569472	0.463132	0.440688	0.820493	0.243286		2020.88	2020-11-15	2020-11-15T14:53:55	1605452035190	0.989913	0.950666	1.69858	0.535663		2021.13	2021-02-14	2021-02-14T21:29:53	1613338193158	0.523052	0.493823	0.969602	0.265674		2020.89	2020-11-20	2020-11-20T01:39:00	1605836340060	0.797269
2021.02	2021-01-07	2021-01-07T07:56:21	1610006181563	0.671178	0.633926	1.11684	0.39128		2020.88	2020-11-14	2020-11-14T16:19:30	1605370770924	0.778094	0.739103	1.38313	0.394515		2020.89	2020-11-18	2020-11-18T00:17:48	1605658668822	0.463132	0.440688	0.820493	0.243286		2020.77	2020-10-06	2020-10-06T21:33:05	1602019985454	0.989913	0.950666	1.69858	0.535663		2021.03	2021-01-11	2021-01-11T11:35:52	1610364952746	0.523052	0.493823	0.969602	0.265674		2020.78	2020-10-11	2020-10-11T14:34:56	1602426896520	0.797269
2020.93	2020-12-02	2020-12-02T16:30:09	1606926609380	0.671178	0.633926	1.11684	0.39128		2020.77	2020-10-08	2020-10-08T02:41:15	1602124875946	0.778094	0.739103	1.38313	0.394515		2020.78	2020-10-11	2020-10-11T15:06:08	1602428768173	0.463132	0.440688	0.820493	0.243286		2020.66	2020-08-28	2020-08-28T04:12:15	1598587935718	0.989913	0.950666	1.69858	0.535663		2020.94	2020-12-07	2020-12-07T01:41:52	1607305312334	0.523052	0.493823	0.969602	0.265674		2020.68	2020-09-02	2020-09-02T03:30:52	1599017452980	0.797269
2020.83	2020-10-29	2020-10-29T01:03:57	1603933437197	0.671178	0.633926	1.11684	0.39128		2020.67	2020-08-31	2020-08-31T13:03:00	1598878980968	0.778094	0.739103	1.38313	0.394515		2020.68	2020-09-04	2020-09-04T05:54:27	1599198867523	0.463132	0.440688	0.820493	0.243286		2020.55	2020-07-19	2020-07-19T10:51:25	1595155885982	0.989913	0.950666	1.69858	0.535663		2020.84	2020-11-02	2020-11-02T15:47:51	1604332071923	0.523052	0.493823	0.969602	0.265674		2020.57	2020-07-24	2020-07-24T16:26:49	1595608009439	0.797269
2020.74	2020-09-24	2020-09-24T09:37:45	1600940265014	0.671178	0.633926	1.11684	0.39128		2020.57	2020-07-24	2020-07-24T23:24:45	1595633085990	0.778094	0.739103	1.38313	0.394515		2020.58	2020-07-28	2020-07-28T20:42:46	1595968966873	0.463132	0.440688	0.820493	0.243286		2020.44	2020-06-09	2020-06-09T17:30:36	1591723836245	0.989913	0.950666	1.69858	0.535663		2020.75	2020-09-29	2020-09-29T05:53:51	1601358831511	0.523052	0.493823	0.969602	0.265674		2020.46	2020-06-15	2020-06-15T05:22:45	1592198565899	0.797269
2020.64	2020-08-20	2020-08-20T18:11:32	1597947092831	0.671178	0.633926	1.11684	0.39128		2020.47	2020-06-17	2020-06-17T09:46:31	1592387191012	0.778094	0.739103	1.38313	0.394515		2020.48	2020-06-21	2020-06-21T11:31:06	1592739066224	0.463132	0.440688	0.820493	0.243286		2020.34	2020-05-01	2020-05-01T00:09:46	1588291786509	0.989913	0.950666	1.69858	0.535663		2020.66	2020-08-25	2020-08-25T19:59:51	1598385591099	0.523052	0.493823	0.969602	0.265674		2020.35	2020-05-06	2020-05-06T18:18:42	1588789122359	0.797269
2020.55	2020-07-17	2020-07-17T02:45:20	1594953920648	0.671178	0.633926	1.11684	0.39128		2020.36	2020-05-10	2020-05-10T20:08:16	1589141296034	0.778094	0.739103	1.38313	0.394515		2020.37	2020-05-15	2020-05-15T02:19:25	1589509165574	0.463132	0.440688	0.820493	0.243286		2020.23	2020-03-22	2020-03-22T06:48:56	1584859736773	0.989913	0.950666	1.69858	0.535663		2020.56	2020-07-22	2020-07-22T10:05:50	1595412350687	0.523052	0.493823	0.969602	0.265674		2020.24	2020-03-28	2020-03-28T07:14:38	1585379678826	0.797269
2020.45	2020-06-12	2020-06-12T11:19:08	1591960748465	0.671178	0.633926	1.11684	0.39128		2020.26	2020-04-03	2020-04-03T06:30:01	1585895401056	0.778094	0.739103	1.38313	0.394515		2020.27	2020-04-07	2020-04-07T17:07:44	1586279264925	0.463132	0.440688	0.820493	0.243286		2020.12	2020-02-11	2020-02-11T13:28:07	1581427687037	0.989913	0.950666	1.69858	0.535663		2020.47	2020-06-18	2020-06-18T00:11:50	1592439110275	0.523052	0.493823	0.969602	0.265674		2020.14	2020-02-17	2020-02-17T20:10:35	1581970235285	0.797269
2020.36	2020-05-08	2020-05-08T19:52:56	1588967576282	0.671178	0.633926	1.11684	0.39128		2020.16	2020-02-25	2020-02-25T16:51:46	1582649506078	0.778094	0.739103	1.38313	0.394515		2020.17	2020-03-01	2020-03-01T07:56:04	1583049364275	0.463132	0.440688	0.820493	0.243286		2020.01	2020-01-02	2020-01-02T20:07:17	1577995637301	0.989913	0.950666	1.69858	0.535663		2020.37	2020-05-14	2020-05-14T14:17:49	1589465869863	0.523052	0.493823	0.969602	0.265674		2020.03	2020-01-09	2020-01-09T09:06:31	1578560791745	0.797269
2020.26	2020-04-04	2020-04-04T04:26:44	1585974404099	0.671178	0.633926	1.11684	0.39128		2020.05	2020-01-19	2020-01-19T03:13:31	1579403611100	0.778094	0.739103	1.38313	0.394515		2020.07	2020-01-23	2020-01-23T22:44:23	1579819463625	0.463132	0.440688	0.820493	0.243286		2019.9	2019-11-24	2019-11-24T02:46:27	1574563587565	0.989913	0.950666	1.69858	0.535663		2020.28	2020-04-10	2020-04-10T04:23:49	1586492629451	0.523052	0.493823	0.969602	0.265674		2019.92	2019-11-30	2019-11-30T22:02:28	1575151348205	0.797269
2020.17	2020-02-29	2020-02-29T13:00:31	1582981231916	0.671178	0.633926	1.11684	0.39128		2019.95	2019-12-12	2019-12-12T13:35:16	1576157716122	0.778094	0.739103	1.38313	0.394515		2019.96	2019-12-17	2019-12-17T13:32:42	1576589562976	0.463132	0.440688	0.820493	0.243286		2019.79	2019-10-15	2019-10-15T09:25:37	1571131537836	0.989913	0.950666	1.69858	0.535663		2020.18	2020-03-06	2020-03-06T18:29:49	1583519389039	0.523052	0.493823	0.969602	0.265674		2019.81	2019-10-22	2019-10-22T10:58:24	1571741904665	0.797269
2020.07	2020-01-25	2020-01-25T21:34:19	1579988059733	0.671178	0.633926	1.11684	0.39128		2019.85	2019-11-04	2019-11-04T23:57:01	1572911821144	0.778094	0.739103	1.38313	0.394515		2019.86	2019-11-10	2019-11-10T04:21:02	1573359662327	0.463132	0.440688	0.820493	0.243286		2019.68	2019-09-05	2019-09-05T16:04:48	1567699488100	2.2713	1.06345	9.44902	0.548432		2020.09	2020-02-01	2020-02-01T08:35:48	1580546148627	0.523052	0.493823	0.969602	0.265674		2019.7	2019-09-12	2019-09-12T23:54:21	1568332461124	0.797269
2019.98	2019-12-22	2019-12-22T06:08:07	1576994887550	0.671178	0.633926	1.11684	0.39128		2019.75	2019-09-28	2019-09-28T10:18:46	1569665926166	0.778094	0.739103	1.38313	0.394515		2019.76	2019-10-03	2019-10-03T19:09:21	1570129761677	0.463132	0.440688	0.820493	0.243286		2019.57	2019-07-27	2019-07-27T22:43:58	1564267438364	6.97833	6.77708	11.2175	3.96534		2020	2019-12-28	2019-12-28T22:41:48	1577572908216	0.523052	0.493823	0.969602	0.265674		2019.59	2019-08-04	2019-08-04T12:50:17	1564923017584	6.59079
2019.88	2019-11-17	2019-11-17T14:41:55	1574001715367	0.671178	0.633926	1.11684	0.39128		2019.64	2019-08-21	2019-08-21T20:40:31	1566420031188	0.778094	0.739103	1.38313	0.394515		2019.66	2019-08-27	2019-08-27T09:57:41	1566899861028	0.463132	0.440688	0.820493	0.243286		2019.47	2019-06-18	2019-06-18T05:23:08	1560835388629	2.94803	2.45768	8.40712	1.38298		2019.9	2019-11-24	2019-11-24T12:47:47	1574599667804	0.523052	0.493823	0.969602	0.265674		2019.49	2019-06-26	2019-06-26T01:46:14	1561513574044	6.58211
2019.79	2019-10-13	2019-10-13T23:15:43	1571008543184	0.671178	0.633926	1.11684	0.39128		2019.54	2019-07-15	2019-07-15T07:02:16	1563174136210	4.16244	4.30196	11.019	0.597702		2019.55	2019-07-21	2019-07-21T00:46:00	1563669960378	5.34799	5.47352	9.10271	0.564369		2019.36	2019-05-09	2019-05-09T12:02:18	1557403338893	1.56524	1.40286	3.3307	0.786823		2019.81	2019-10-21	2019-10-21T02:53:47	1571626427392	0.523052	0.493823	0.969602	0.265674		2019.38	2019-05-17	2019-05-17T14:42:10	1558104130504	4.34494
2019.69	2019-09-09	2019-09-09T07:49:31	1568015371001	5.60347	5.77594	9.38459	0.765724		2019.44	2019-06-07	2019-06-07T17:24:01	1559928241232	6.74479	6.45193	11.4247	3.46645		2019.45	2019-06-13	2019-06-13T15:34:19	1560440059729	5.7954	5.60501	9.14433	3.45535		2019.25	2019-03-30	2019-03-30T18:41:29	1553971289157	1.37312	1.31152	2.29033	0.767306		2019.71	2019-09-16	2019-09-16T16:59:46	1568653186980	0.523052	0.493823	0.969602	0.265674		2019.27	2019-04-08	2019-04-08T03:38:06	1554694686963	3.6027
2019.6	2019-08-05	2019-08-05T16:23:18	1565022198819	6.08624	5.99184	9.56373	3.62905		2019.33	2019-05-01	2019-05-01T03:45:46	1556682346254	4.87279	3.2565	11.4247	1.41504		2019.35	2019-05-07	2019-05-07T06:22:39	1557210159079	3.80896	3.13291	8.78845	1.80314		2019.14	2019-02-19	2019-02-19T01:20:39	1550539239421	1.37312	1.31152	2.29033	0.767306		2019.62	2019-08-13	2019-08-13T07:05:46	1565679946569	0.523052	0.493823	0.969602	0.265674		2019.16	2019-02-27	2019-02-27T16:34:03	1551285243423	2.02033
2019.5	2019-07-02	2019-07-02T00:57:06	1562029026636	5.14735	4.91851	9.42955	2.11897		2019.23	2019-03-24	2019-03-24T14:07:31	1553436451276	2.0338	1.82386	4.49009	0.647195		2019.25	2019-03-30	2019-03-30T21:10:58	1553980258429	2.71704	2.75479	5.05909	0.956705		2019.03	2019-01-10	2019-01-10T07:59:49	1547107189684	1.37312	1.31152	2.29033	0.767306		2019.52	2019-07-09	2019-07-09T21:11:46	1562706706157	7.33055	7.09149	12.4232	3.73054		2019.05	2019-01-19	2019-01-19T05:29:59	1547875799883	1.98652
2019.41	2019-05-28	2019-05-28T09:30:54	1559035854453	3.18972	3.11002	5.18464	1.47334		2019.13	2019-02-15	2019-02-15T00:29:16	1550190556298	1.16244	1.07994	2.17319	0.616006		2019.15	2019-02-21	2019-02-21T11:59:17	1550750357780	1.50901	1.42293	2.51733	0.843832		2018.92	2018-12-01	2018-12-01T14:38:59	1543675139948	1.37312	1.31152	2.29033	0.767306		2019.43	2019-06-05	2019-06-05T11:17:45	1559733465745	7.33403	7.09149	12.4232	3.73489		2018.95	2018-12-10	2018-12-10T18:25:56	1544466356343	1.98652
2019.31	2019-04-23	2019-04-23T18:04:42	1556042682270	1.84921	1.60957	4.62624	0.94512		2019.02	2019-01-08	2019-01-08T10:51:01	1546944661320	1.12717	1.07404	1.98584	0.616006		2019.04	2019-01-15	2019-01-15T02:47:37	1547520457130	1.47781	1.41685	2.43096	0.843832		2018.81	2018-10-22	2018-10-22T21:18:10	1540243090212	1.37735	1.31321	2.29517	0.767306		2019.34	2019-05-02	2019-05-02T01:23:45	1556760225333	5.96432	6.03609	12.4232	1.72685		2018.84	2018-11-01	2018-11-01T07:21:52	1541056912802	1.98652
2019.22	2019-03-20	2019-03-20T02:38:30	1553049510087	1.62064	1.5612	2.58741	0.939881		2018.92	2018-12-01	2018-12-01T21:12:46	1543698766344	1.12717	1.07404	1.98584	0.616006		2018.94	2018-12-08	2018-12-08T17:35:56	1544290556480	1.47781	1.41685	2.43096	0.843832		2018.7	2018-09-13	2018-09-13T03:57:20	1536811040476	1.54827	1.48909	2.52166	0.876332		2019.24	2019-03-28	2019-03-28T15:29:44	1553786984921	2.89192	2.88473	5.23222	0.911967		2018.73	2018-09-22	2018-09-22T20:17:49	1537647469262	1.97922
2019.12	2019-02-13	2019-02-13T11:12:17	1550056337904	1.62064	1.5612	2.58741	0.939881		2018.82	2018-10-25	2018-10-25T07:34:31	1540452871366	1.12717	1.07404	1.98584	0.616006		2018.84	2018-11-01	2018-11-01T08:24:15	1541060655831	1.47781	1.41685	2.43096	0.843832		2018.59	2018-08-04	2018-08-04T10:36:30	1533378990740	1.54827	1.48909	2.52166	0.876332		2019.15	2019-02-22	2019-02-22T05:35:44	1550813744509	1.67674	1.38948	4.8517	0.758309		2018.62	2018-08-14	2018-08-14T09:13:45	1534238025722	1.71283
2019.03	2019-01-09	2019-01-09T19:46:05	1547063165721	1.62064	1.5612	2.58741	0.939881		2018.72	2018-09-17	2018-09-17T17:56:16	1537206976388	1.12717	1.07404	1.98584	0.616006		2018.74	2018-09-24	2018-09-24T23:12:35	1537830755181	1.47781	1.41685	2.43096	0.843832		2018.49	2018-06-25	2018-06-25T17:15:41	1529946941004	1.54827	1.48909	2.52166	0.876332		2019.05	2019-01-18	2019-01-18T19:41:44	1547840504098	1.42678	1.34609	2.52277	0.757024		2018.51	2018-07-05	2018-07-05T22:09:42	1530828582182	1.71283
2018.93	2018-12-06	2018-12-06T04:19:53	1544069993538	1.62064	1.5612	2.58741	0.939881		2018.61	2018-08-11	2018-08-11T04:18:01	1533961081410	2.26259	2.20157	3.69214	1.35377		2018.63	2018-08-18	2018-08-18T14:00:54	1534600854531	2.31119	2.24227	3.76899	1.30183		2018.38	2018-05-16	2018-05-16T23:54:51	1526514891268	1.54827	1.48909	2.52166	0.876332		2018.96	2018-12-15	2018-12-15T09:47:43	1544867263686	1.42376	1.34609	2.51471	0.757024		2018.41	2018-05-27	2018-05-27T11:05:38	1527419138641	1.71283
2018.84	2018-11-01	2018-11-01T12:53:41	1541076821355	1.62064	1.5612	2.58741	0.939881		2018.51	2018-07-04	2018-07-04T14:39:46	1530715186432	2.27294	2.21274	3.69214	1.35284		2018.53	2018-07-12	2018-07-12T04:49:13	1531370953883	2.48386	2.4048	3.91905	1.45436		2018.27	2018-04-07	2018-04-07T06:34:01	1523082841531	1.54827	1.48909	2.52166	0.876332		2018.86	2018-11-10	2018-11-10T23:53:43	1541894023274	1.42376	1.34609	2.51471	0.757024		2018.3	2018-04-18	2018-04-18T00:01:35	1524009695101	1.71283
2018.74	2018-09-27	2018-09-27T21:27:29	1538083649172	2.28444	2.19542	3.61181	1.35984		2018.41	2018-05-28	2018-05-28T01:01:31	1527469291454	2.27294	2.21274	3.69214	1.35284		2018.43	2018-06-04	2018-06-04T19:37:33	1528141053233	2.48386	2.4048	3.91905	1.45436		2018.16	2018-02-26	2018-02-26T13:13:11	1519650791795	2.12476	1.6478	6.15319	0.892174		2018.77	2018-10-07	2018-10-07T13:59:42	1538920782862	1.42376	1.34609	2.51471	0.757024		2018.19	2018-03-09	2018-03-09T12:57:31	1520600251561	1.71283
2018.65	2018-08-24	2018-08-24T06:01:16	1535090476989	2.28363	2.19412	3.58919	1.35984		2018.3	2018-04-20	2018-04-20T11:23:16	1524223396476	2.27294	2.21274	3.69214	1.35284		2018.33	2018-04-28	2018-04-28T10:25:52	1524911152584	2.48386	2.4048	3.91905	1.45436		2018.05	2018-01-17	2018-01-17T19:52:22	1516218742059	3.58987	3.52044	7.31599	1.03296		2018.68	2018-09-03	2018-09-03T04:05:42	1535947542450	1.42376	1.34609	2.51471	0.757024		2018.08	2018-01-29	2018-01-29T01:53:28	1517190808021	1.7397
2018.55	2018-07-20	2018-07-20T14:35:04	1532097304806	2.28363	2.19412	3.58919	1.35984		2018.2	2018-03-13	2018-03-13T21:45:01	1520977501498	2.27294	2.21274	3.69214	1.35284		2018.22	2018-03-22	2018-03-22T01:14:11	1521681251934	2.48386	2.4048	3.91905	1.45436		2017.94	2017-12-09	2017-12-09T02:31:32	1512786692323	4.20492	4.02458	7.62568	1.47845		2018.58	2018-07-30	2018-07-30T18:11:42	1532974302038	2.61253	2.50292	4.53697	1.41026		2017.97	2017-12-20	2017-12-20T14:49:24	1513781364480	2.58261
2018.46	2018-06-15	2018-06-15T23:08:52	1529104132623	2.28363	2.19412	3.58919	1.35984		2018.1	2018-02-04	2018-02-04T08:06:46	1517731606520	2.27294	2.21274	3.69214	1.35284		2018.12	2018-02-12	2018-02-12T16:02:31	1518451351284	2.48386	2.4048	3.91905	1.45436		2017.83	2017-10-30	2017-10-30T09:10:42	1509354642587	4.37957	4.14125	7.63353	2.26054		2018.49	2018-06-26	2018-06-26T08:17:41	1530001061626	2.61256	2.51426	4.51546	1.39788		2017.86	2017-11-11	2017-11-11T03:45:20	1510371920940	4.20323
2018.36	2018-05-12	2018-05-12T07:42:40	1526110960440	2.28363	2.19412	3.58919	1.35984		2018	2017-12-28	2017-12-28T18:28:31	1514485711542	2.28307	2.22145	3.7622	1.37317		2018.02	2018-01-06	2018-01-06T06:50:50	1515221450635	2.48386	2.4048	3.91905	1.45436		2017.72	2017-09-20	2017-09-20T15:49:52	1505922592851	4.37957	4.14125	7.63353	2.26054		2018.39	2018-05-22	2018-05-22T22:23:41	1527027821214	2.61256	2.51426	4.51546	1.39788		2017.76	2017-10-02	2017-10-02T16:41:17	1506962477400	4.82151
2018.27	2018-04-07	2018-04-07T16:16:28	1523117788257	2.28363	2.19412	3.58919	1.35984		2017.89	2017-11-21	2017-11-21T04:50:16	1511239816564	2.45214	2.27762	4.75847	1.41128		2017.92	2017-11-29	2017-11-29T21:39:09	1511991549985	2.53152	2.42435	4.17466	1.54472		2017.62	2017-08-11	2017-08-11T22:29:03	1502490543114	4.24593	4.00221	7.44588	2.13847		2018.3	2018-04-18	2018-04-18T12:29:40	1524054580802	2.61256	2.51426	4.51546	1.39788		2017.65	2017-08-24	2017-08-24T05:37:13	1503553033860	4.85265
2018.17	2018-03-04	2018-03-04T00:50:16	1520124616074	2.28363	2.19412	3.58919	1.35984		2017.79	2017-10-14	2017-10-14T15:12:01	1507993921586	3.9037	3.57702	8.13338	1.7392		2017.81	2017-10-23	2017-10-23T12:27:29	1508761649335	2.75936	2.52686	5.50105	1.61382		2017.51	2017-07-03	2017-07-03T05:08:13	1499058493378	3.30903	3.04692	6.48109	1.45449		2018.2	2018-03-15	2018-03-15T02:35:40	1521081340391	2.61256	2.51426	4.51546	1.39788		2017.54	2017-07-15	2017-07-15T18:33:10	1500143590319	3.51187
2018.08	2018-01-28	2018-01-28T09:24:03	1517131443892	2.40171	2.2234	4.3621	1.38552		2017.69	2017-09-07	2017-09-07T01:33:46	1504748026608	4.85924	4.69907	8.54461	2.17982		2017.71	2017-09-16	2017-09-16T03:15:48	1505531748686	3.90631	3.73226	7.44966	1.98182		2017.4	2017-05-24	2017-05-24T11:47:23	1495626443642	2.22097	2.13011	3.60672	1.32364		2018.11	2018-02-08	2018-02-08T16:41:39	1518108099979	2.61256	2.51426	4.51546	1.39788		2017.43	2017-06-06	2017-06-06T07:29:06	1496734146779	3.36836
2017.98	2017-12-24	2017-12-24T17:57:51	1514138271709	4.21742	2.7664	10.9533	1.56587		2017.58	2017-07-31	2017-07-31T11:55:31	1501502131630	5.00896	4.8597	8.63382	2.23675		2017.61	2017-08-09	2017-08-09T18:04:08	1502301848036	4.51497	4.34626	7.69883	2.50859		2017.29	2017-04-14	2017-04-14T18:26:33	1492194393906	2.21638	2.12911	3.60491	1.32364		2018.02	2018-01-05	2018-01-05T06:47:39	1515134859567	2.61487	2.51508	4.53697	1.39788		2017.32	2017-04-27	2017-04-27T20:25:03	1493324703239	3.25481
2017.89	2017-11-20	2017-11-20T02:31:39	1511145099526	6.82778	7.20654	12.5095	1.92381		2017.48	2017-06-23	2017-06-23T22:17:16	1498256236652	5.00894	4.8597	8.63382	2.23675		2017.51	2017-07-03	2017-07-03T08:52:27	1499071947387	4.51497	4.34626	7.69883	2.50859		2017.18	2017-03-06	2017-03-06T01:05:44	1488762344170	2.21638	2.12911	3.60491	1.32364		2017.92	2017-12-01	2017-12-01T20:53:39	1512161619155	2.73851	2.56228	5.31244	1.46411		2017.22	2017-03-19	2017-03-19T09:20:59	1489915259699	3.25481
2017.79	2017-10-16	2017-10-16T11:05:27	1508151927346	8.24698	8.02032	12.9601	4.90783		2017.38	2017-05-17	2017-05-17T08:39:01	1495010341674	2.59426	2.44228	4.88313	1.15997		2017.4	2017-05-26	2017-05-26T23:40:46	1495842046737	2.95037	2.79955	5.14926	1.63473		2017.07	2017-01-25	2017-01-25T07:44:54	1485330294434	2.21638	2.12911	3.60491	1.32364		2017.83	2017-10-28	2017-10-28T10:59:38	1509188378743	3.27123	2.76336	8.10313	1.5874		2017.11	2017-02-07	2017-02-07T22:16:56	1486505816158	3.25481
2017.7	2017-09-11	2017-09-11T19:39:15	1505158755163	8.25825	8.0367	12.9601	4.96446		2017.27	2017-04-09	2017-04-09T19:00:46	1491764446696	1.74591	1.66067	2.96772	0.996607		2017.3	2017-04-19	2017-04-19T14:29:06	1492612146087	2.62251	2.51097	4.20176	1.62916		2016.96	2016-12-15	2016-12-15T14:24:04	1481811844698	2.21638	2.12911	3.60491	1.32364		2017.73	2017-09-24	2017-09-24T01:05:38	1506215138331	4.58258	3.79795	10.3829	1.85893		2017	2016-12-30	2016-12-30T11:12:52	1483096372618	3.25481
2017.6	2017-08-08	2017-08-08T04:13:02	1502165582980	8.0565	8.01358	12.9601	2.53024		2017.17	2017-03-03	2017-03-03T05:22:31	1488518551718	1.72033	1.65912	2.77086	0.996607		2017.2	2017-03-13	2017-03-13T05:17:25	1489382245438	2.61649	2.50715	4.13435	1.62916		2016.85	2016-11-05	2016-11-05T21:03:14	1478379794961	3.95142	3.33794	8.72451	1.39361		2017.64	2017-08-20	2017-08-20T15:11:37	1503241897919	6.15944	5.85005	11.6196	2.6326		2016.89	2016-11-20	2016-11-20T00:08:49	1479600529078	3.25481
2017.51	2017-07-04	2017-07-04T12:46:50	1499172410797	3.21436	3.08824	5.21909	1.94409		2017.07	2017-01-24	2017-01-24T15:44:16	1485272656740	1.72033	1.65912	2.77086	0.996607		2017.1	2017-02-03	2017-02-03T20:05:44	1486152344788	2.61649	2.50715	4.13435	1.62916		2016.74	2016-09-27	2016-09-27T03:42:25	1474947745225	5.65829	5.44739	9.44227	2.94192		2017.54	2017-07-17	2017-07-17T05:17:37	1500268657508	6.37136	6.09389	11.7424	2.81311		2016.78	2016-10-11	2016-10-11T13:04:45	1476191085538	4.06005
2017.41	2017-05-30	2017-05-30T21:20:38	1496179238614	2.88613	2.77557	4.57075	1.84953		2016.97	2016-12-17	2016-12-17T02:06:01	1481940361762	1.72222	1.66055	2.77086	0.997669		2016.99	2016-12-27	2016-12-27T10:54:04	1482836044138	2.61649	2.50715	4.13435	1.62916		2016.64	2016-08-18	2016-08-18T10:21:35	1471515695489	3.50749	3.35146	5.96523	1.86871		2017.45	2017-06-12	2017-06-12T19:23:37	1497295417096	6.19025	6.08001	11.7424	1.53172		2016.68	2016-09-02	2016-09-02T02:00:41	1472781641997	4.26978
2017.32	2017-04-26	2017-04-26T05:54:26	1493186066431	2.88613	2.77557	4.57075	1.84953		2016.86	2016-11-09	2016-11-09T12:27:46	1478694466784	1.73962	1.67191	2.89046	1.01997		2016.89	2016-11-20	2016-11-20T01:42:23	1479606143489	2.61649	2.50715	4.13435	1.62916		2016.53	2016-07-09	2016-07-09T17:00:45	1468083645753	3.1976	3.06896	5.41332	1.77881		2017.36	2017-05-09	2017-05-09T09:29:36	1494322176684	2.28831	2.1282	4.97275	0.700172		2016.57	2016-07-24	2016-07-24T14:56:38	1469372198457	2.94749
2017.23	2017-03-22	2017-03-22T14:28:14	1490192894248	2.88613	2.77557	4.57075	1.84953		2016.76	2016-10-02	2016-10-02T22:49:31	1475448571806	1.85326	1.75799	3.17222	1.08412		2016.79	2016-10-13	2016-10-13T16:30:42	1476376242839	2.61649	2.50715	4.13435	1.62916		2016.42	2016-05-30	2016-05-30T23:39:56	1464651596017	2.99396	2.87752	4.85626	1.67829		2017.26	2017-04-04	2017-04-04T23:35:36	1491348936273	1.32009	1.25368	2.26916	0.674493		2016.46	2016-06-15	2016-06-15T03:52:34	1465962754917	3.21121
2017.13	2017-02-15	2017-02-15T23:02:02	1487199722065	2.88613	2.77557	4.57075	1.84953		2016.66	2016-08-26	2016-08-26T09:11:16	1472202676828	2.26732	2.13166	4.29841	1.08412		2016.69	2016-09-06	2016-09-06T07:19:02	1473146342190	5.08464	4.85323	9.22381	2.35532		2016.31	2016-04-21	2016-04-21T06:19:06	1461219546281	2.98888	2.86744	4.81097	1.67829		2017.17	2017-03-01	2017-03-01T13:41:35	1488375695861	1.30256	1.25368	2.21649	0.674493		2016.35	2016-05-06	2016-05-06T16:48:31	1462553311377	3.14383
2017.04	2017-01-12	2017-01-12T07:35:49	1484206549882	2.88613	2.77557	4.57075	1.84953		2016.55	2016-07-19	2016-07-19T19:33:01	1468956781850	1.59559	1.44915	3.63415	0.696229		2016.58	2016-07-30	2016-07-30T22:07:21	1469916441540	5.66111	5.3891	9.67513	3.01741		2016.2	2016-03-12	2016-03-12T12:58:16	1457787496545	2.98888	2.86744	4.81097	1.67829		2017.07	2017-01-26	2017-01-26T03:47:35	1485402455449	1.30319	1.25438	2.21649	0.674562		2016.24	2016-03-28	2016-03-28T05:44:27	1459143867836	3.14383
2016.94	2016-12-07	2016-12-07T16:09:37	1481126977699	2.88613	2.77557	4.57075	1.84953		2016.45	2016-06-12	2016-06-12T05:54:46	1465710886872	0.922466	0.80339	2.55822	0.447659		2016.48	2016-06-23	2016-06-23T12:55:40	1466686540890	4.04362	3.84806	6.95539	2.23155		2016.09	2016-02-01	2016-02-01T19:37:26	1454355446808	2.98888	2.86744	4.81097	1.67829		2016.98	2016-12-21	2016-12-21T17:53:35	1482342815037	1.34225	1.26805	2.35821	0.686012		2016.14	2016-02-17	2016-02-17T18:40:24	1455734424296	3.14383
2016.85	2016-11-03	2016-11-03T00:43:25	1478133805516	4.14845	3.93914	7.15925	2.21633		2016.35	2016-05-05	2016-05-05T16:16:31	1462464991894	0.832386	0.790359	1.41977	0.447659		2016.38	2016-05-17	2016-05-17T03:44:00	1463456640241	3.5561	3.26498	6.67546	1.62607		2015.98	2015-12-24	2015-12-24T02:16:37	1450923397072	2.98888	2.86744	4.81097	1.67829		2016.88	2016-11-17	2016-11-17T07:59:34	1479369574625	1.44384	1.31088	3.23442	0.716068		2016.03	2016-01-09	2016-01-09T07:36:20	1452324980756	3.14383
2016.75	2016-09-29	2016-09-29T09:17:13	1475140633333	5.07101	4.9124	7.53172	3.03401		2016.25	2016-03-29	2016-03-29T02:38:16	1459219096916	0.832386	0.790359	1.41977	0.447659		2016.28	2016-04-09	2016-04-09T18:32:19	1460226739591	2.74512	2.61695	4.59213	1.56357		2015.87	2015-11-14	2015-11-14T08:55:47	1447491347336	2.98888	2.86744	4.81097	1.67829		2016.79	2016-10-13	2016-10-13T22:05:34	1476396334213	1.76124	1.46324	4.50626	0.772793		2015.92	2015-11-30	2015-11-30T20:32:17	1448915537216	3.14383
2016.66	2016-08-25	2016-08-25T17:51:01	1472147461150	3.45559	3.27739	6.25385	1.99584		2016.14	2016-02-20	2016-02-20T13:00:01	1455973201938	0.832386	0.790359	1.41977	0.447659		2016.18	2016-03-03	2016-03-03T09:20:38	1456996838941	2.71309	2.61554	4.40961	1.56357		2015.76	2015-10-05	2015-10-05T15:34:57	1444059297600	2.98888	2.86744	4.81097	1.67829		2016.7	2016-09-09	2016-09-09T12:11:33	1473423093801	3.18167	2.97653	6.02301	1.40547		2015.81	2015-10-22	2015-10-22T09:28:13	1445506093675	3.14383
2016.56	2016-07-22	2016-07-22T02:24:48	1469154288967	3.76124	3.63361	5.86832	2.40317		2016.04	2016-01-13	2016-01-13T23:21:46	1452727306960	0.832386	0.790359	1.41977	0.447659		2016.07	2016-01-26	2016-01-26T00:08:58	1453766938292	2.71309	2.61554	4.40961	1.56357		2015.66	2015-08-26	2015-08-26T22:14:07	1440627247864	2.26634	2.08121	4.59341	1.03858		2016.6	2016-08-06	2016-08-06T02:17:33	1470449853389	3.30499	3.08619	6.04609	1.61161		2015.7	2015-09-12	2015-09-12T22:24:10	1442096650135	3.18309
2016.47	2016-06-17	2016-06-17T10:58:36	1466161116785	3.97016	3.83856	6.55459	2.37157		2015.94	2015-12-07	2015-12-07T09:43:31	1449481411982	0.832386	0.790359	1.41977	0.447659		2015.97	2015-12-19	2015-12-19T14:57:17	1450537037642	2.71309	2.61554	4.40961	1.56357		2015.55	2015-07-18	2015-07-18T04:53:18	1437195198128	1.84271	1.76409	3.27323	0.875808		2016.51	2016-07-02	2016-07-02T16:23:32	1467476612977	3.01939	2.86413	5.4888	1.42741		2015.59	2015-08-04	2015-08-04T11:20:06	1438687206595	2.93133
2016.37	2016-05-13	2016-05-13T19:32:24	1463167944602	3.94544	3.82602	6.47442	2.37157		2015.83	2015-10-30	2015-10-30T20:05:17	1446235517004	0.832386	0.790359	1.41977	0.447659		2015.87	2015-11-12	2015-11-12T05:45:36	1447307136993	2.71309	2.61554	4.40961	1.56357		2015.44	2015-06-08	2015-06-08T11:32:28	1433763148392	1.61459	1.52947	2.88079	0.847916		2016.41	2016-05-29	2016-05-29T06:29:32	1464503372566	2.85318	2.68328	5.43912	1.20249		2015.49	2015-06-26	2015-06-26T00:16:03	1435277763055	1.17834
2016.28	2016-04-09	2016-04-09T04:06:12	1460174772419	3.94544	3.82602	6.47442	2.37157		2015.73	2015-09-23	2015-09-23T06:27:02	1442989622026	0.832386	0.790359	1.41977	0.447659		2015.77	2015-10-05	2015-10-05T20:33:56	1444077236343	2.71309	2.61554	4.40961	1.56357		2015.33	2015-04-29	2015-04-29T18:11:38	1430331098655	1.61463	1.52947	2.88079	0.847916		2016.32	2016-04-24	2016-04-24T20:35:32	1461530132154	2.17688	2.02359	4.46089	1.10305		2015.38	2015-05-17	2015-05-17T13:11:59	1431868319514	1.04469
2016.18	2016-03-05	2016-03-05T12:40:00	1457181600236	3.94544	3.82602	6.47442	2.37157		2015.63	2015-08-16	2015-08-16T16:48:47	1439743727048	0.863072	0.803945	1.68433	0.449954		2015.66	2015-08-29	2015-08-29T11:22:15	1440847335693	2.71309	2.61554	4.40961	1.56357		2015.22	2015-03-21	2015-03-21T00:50:48	1426899048919	1.61463	1.52947	2.88079	0.847916		2016.22	2016-03-21	2016-03-21T10:41:31	1458556891742	2.09391	2.00798	3.5881	1.09773		2015.27	2015-04-08	2015-04-08T02:07:55	1428458875974	1.04469
2016.09	2016-01-30	2016-01-30T21:13:48	1454188428053	3.94544	3.82602	6.47442	2.37157		2015.53	2015-07-10	2015-07-10T03:10:32	1436497832070	1.90342	1.76475	4.17	0.765481		2015.56	2015-07-23	2015-07-23T02:10:35	1437617435044	3.80009	3.65722	6.21865	2.075		2015.11	2015-02-09	2015-02-09T07:29:59	1423466999183	1.61463	1.52947	2.88079	0.847916		2016.13	2016-02-16	2016-02-16T00:47:31	1455583651330	2.09391	2.00798	3.5881	1.09773		2015.16	2015-02-27	2015-02-27T15:03:52	1425049432434	1.04469
2015.99	2015-12-27	2015-12-27T05:47:35	1451195255870	3.94544	3.82602	6.47442	2.37157		2015.42	2015-06-02	2015-06-02T13:32:17	1433251937092	1.15242	0.952581	2.54429	0.390014		2015.46	2015-06-15	2015-06-15T16:58:54	1434387534394	1.94789	1.72283	5.58432	0.966588		2015	2014-12-31	2014-12-31T14:09:09	1420034949447	1.61463	1.52947	2.88079	0.847916		2016.04	2016-01-12	2016-01-12T14:53:30	1452610410918	2.09391	2.00798	3.5881	1.09773		2015.05	2015-01-19	2015-01-19T03:59:48	1421639988894	1.04469
2015.9	2015-11-22	2015-11-22T14:21:23	1448202083687	3.94544	3.82602	6.47442	2.37157		2015.32	2015-04-25	2015-04-25T23:54:02	1430006042114	0.681904	0.648636	1.13674	0.369177		2015.36	2015-05-09	2015-05-09T07:47:13	1431157633744	1.17884	1.05854	2.70531	0.648293		2014.89	2014-11-21	2014-11-21T20:48:19	1416602899711	1.61463	1.52947	2.88079	0.847916		2015.94	2015-12-09	2015-12-09T04:59:30	1449637170506	2.09391	2.00798	3.5881	1.09773		2014.95	2014-12-10	2014-12-10T16:55:45	1418230545353	1.04469
2015.8	2015-10-18	2015-10-18T22:55:11	1445208911504	3.94544	3.82602	6.47442	2.37157		2015.22	2015-03-19	2015-03-19T10:15:47	1426760147136	0.681904	0.648636	1.13674	0.369177		2015.25	2015-04-01	2015-04-01T22:35:33	1427927733095	1.08892	1.04066	1.81086	0.640094		2014.79	2014-10-13	2014-10-13T03:27:29	1413170849975	1.68984	1.62055	2.87444	0.922379		2015.85	2015-11-04	2015-11-04T19:05:30	1446663930094	2.09391	2.00798	3.5881	1.09773		2014.84	2014-11-01	2014-11-01T05:51:41	1414821101813	1.04469
2015.71	2015-09-14	2015-09-14T07:28:59	1442215739321	4.73464	4.46084	8.0883	2.80848		2015.11	2015-02-09	2015-02-09T20:37:32	1423514252158	0.681904	0.648636	1.13674	0.369177		2015.15	2015-02-23	2015-02-23T13:23:52	1424697832445	1.08892	1.04066	1.81086	0.640094		2014.68	2014-09-03	2014-09-03T10:06:40	1409738800238	1.77067	1.70597	2.82586	1.04289		2015.75	2015-10-01	2015-10-01T09:11:29	1443690689682	2.09391	2.00798	3.5881	1.09773		2014.73	2014-09-22	2014-09-22T18:47:38	1411411658273	1.56831
2015.61	2015-08-10	2015-08-10T16:02:47	1439222567138	4.94164	5.07756	9.19543	1.58408		2015.01	2015-01-03	2015-01-03T06:59:17	1420268357180	0.681904	0.648636	1.13674	0.369177		2015.05	2015-01-17	2015-01-17T04:12:11	1421467931796	1.08892	1.04066	1.81086	0.640094		2014.57	2014-07-25	2014-07-25T16:45:50	1406306750502	1.77067	1.70597	2.82586	1.04289		2015.66	2015-08-27	2015-08-27T23:17:29	1440717449270	2.09391	2.00798	3.5881	1.09773		2014.62	2014-08-14	2014-08-14T07:43:34	1408002214733	1.56636
2015.52	2015-07-07	2015-07-07T00:36:34	1436229394955	2.37608	2.31503	4.06292	1.0414		2014.91	2014-11-26	2014-11-26T17:21:02	1417022462202	0.681904	0.648636	1.13674	0.369177		2014.95	2014-12-10	2014-12-10T19:00:31	1418238031146	1.08892	1.04066	1.81086	0.640094		2014.46	2014-06-15	2014-06-15T23:25:00	1402874700766	1.77067	1.70597	2.82586	1.04289		2015.56	2015-07-24	2015-07-24T13:23:28	1437744208858	2.02978	1.95331	3.82233	0.829032		2014.51	2014-07-05	2014-07-05T20:39:31	1404592771192	1.56636
2015.42	2015-06-02	2015-06-02T09:10:22	1433236222772	1.52275	1.43968	2.56904	0.878494		2014.8	2014-10-20	2014-10-20T03:42:47	1413776567224	0.681904	0.648636	1.13674	0.369177		2014.84	2014-11-03	2014-11-03T09:48:50	1415008130499	1.08892	1.04066	1.81086	0.640094		2014.35	2014-05-07	2014-05-07T06:04:11	1399442651030	1.77154	1.70597	2.82767	1.04289		2015.47	2015-06-20	2015-06-20T03:29:28	1434770968447	1.52566	1.39888	3.16585	0.636911		2014.41	2014-05-27	2014-05-27T09:35:27	1401183327652	1.56636
2015.33	2015-04-28	2015-04-28T17:44:10	1430243050589	1.51165	1.43968	2.4689	0.878494		2014.7	2014-09-12	2014-09-12T14:04:32	1410530672246	0.681904	0.648636	1.13674	0.369177		2014.74	2014-09-27	2014-09-27T00:37:09	1411778229850	1.08892	1.04066	1.81086	0.640094		2014.24	2014-03-28	2014-03-28T12:43:21	1396010601294	1.94572	1.74539	4.96686	1.04965		2015.38	2015-05-16	2015-05-16T17:35:28	1431797728035	1.63135	1.52517	3.00689	0.835197		2014.3	2014-04-17	2014-04-17T22:31:24	1397773884112	1.57461
2015.23	2015-03-25	2015-03-25T02:17:58	1427249878406	1.51165	1.43968	2.4689	0.878494		2014.6	2014-08-06	2014-08-06T00:26:17	1407284777268	0.920371	0.878031	1.67196	0.443439		2014.64	2014-08-20	2014-08-20T15:25:29	1408548329200	1.4986	1.44436	2.36284	0.907457		2014.13	2014-02-16	2014-02-16T19:22:31	1392578551558	4.04191	3.88768	8.71565	1.19466		2015.28	2015-04-12	2015-04-12T07:41:27	1428824487623	1.54757	1.48222	2.61942	0.834404		2014.19	2014-03-09	2014-03-09T11:27:20	1394364440572	2.44176
2015.14	2015-02-18	2015-02-18T10:51:46	1424256706223	1.51165	1.43968	2.4689	0.878494		2014.5	2014-06-29	2014-06-29T10:48:02	1404038882290	0.921741	0.878676	1.69213	0.443439		2014.54	2014-07-14	2014-07-14T06:13:48	1405318428550	1.49583	1.44038	2.36284	0.904634		2014.02	2014-01-08	2014-01-08T02:01:41	1389146501822	4.80858	4.64812	8.99566	1.52692		2015.19	2015-03-08	2015-03-08T21:47:27	1425851247211	1.54757	1.48222	2.61942	0.834404		2014.08	2014-01-29	2014-01-29T00:23:17	1390954997031	4.19152
2015.04	2015-01-14	2015-01-14T19:25:34	1421263534040	1.51165	1.43968	2.4689	0.878494		2014.39	2014-05-22	2014-05-22T21:09:47	1400792987312	1.02952	0.940202	2.29887	0.503434		2014.43	2014-06-06	2014-06-06T21:02:07	1402088527901	1.49583	1.44038	2.36284	0.904634		2013.91	2013-11-29	2013-11-29T08:40:52	1385714452085	5.00065	4.78328	9.08875	2.1396		2015.09	2015-02-02	2015-02-02T11:53:26	1422878006799	1.54757	1.48222	2.61942	0.834404		2013.97	2013-12-20	2013-12-20T13:19:13	1387545553491	4.29535
2014.95	2014-12-11	2014-12-11T03:59:21	1418270361858	1.51165	1.43968	2.4689	0.878494		2014.29	2014-04-15	2014-04-15T07:31:32	1397547092334	1.26385	1.08689	2.82103	0.550708		2014.33	2014-04-30	2014-04-30T11:50:27	1398858627251	1.49583	1.44038	2.36284	0.904634		2013.81	2013-10-20	2013-10-20T15:20:02	1382282402349	4.72424	4.57788	8.86124	1.70605		2015	2014-12-30	2014-12-30T01:59:26	1419904766387	1.54757	1.48222	2.61942	0.834404		2013.86	2013-11-11	2013-11-11T02:15:09	1384136109951	4.29867
2014.85	2014-11-06	2014-11-06T12:33:09	1415277189675	1.51165	1.43968	2.4689	0.878494		2014.19	2014-03-08	2014-03-08T17:53:17	1394301197356	1.46651	1.30239	3.19224	0.622353		2014.23	2014-03-24	2014-03-24T02:38:46	1395628726602	1.50886	1.44284	2.42663	0.907457		2013.7	2013-09-10	2013-09-10T21:59:12	1378850352613	1.1963	0.989405	3.3238	0.548664		2014.9	2014-11-25	2014-11-25T16:05:25	1416931525975	1.54757	1.48222	2.61942	0.834404		2013.76	2013-10-02	2013-10-02T15:11:06	1380726666411	3.58043
2014.76	2014-10-02	2014-10-02T21:06:57	1412284017492	1.1712	1.12604	1.97314	0.612544		2014.08	2014-01-30	2014-01-30T04:15:02	1391055302378	1.60891	1.442	3.73293	0.669355		2014.13	2014-02-14	2014-02-14T17:27:05	1392398825952	1.50886	1.44284	2.42663	0.907457		2013.59	2013-08-02	2013-08-02T04:38:22	1375418302877	0.985082	0.933178	1.74356	0.540725		2014.81	2014-10-22	2014-10-22T06:11:25	1413958285563	1.54757	1.48222	2.61942	0.834404		2013.65	2013-08-24	2013-08-24T04:07:02	1377317222870	1.86558
2014.66	2014-08-29	2014-08-29T05:40:45	1409290845309	1.16588	1.12161	1.96514	0.612544		2013.98	2013-12-23	2013-12-23T14:36:47	1387809407400	1.69932	1.52931	3.87756	0.668425		2014.02	2014-01-08	2014-01-08T08:15:25	1389168925302	5.33175	5.53489	10.9571	1.1884		2013.48	2013-06-23	2013-06-23T11:17:33	1371986253141	0.984949	0.933178	1.74356	0.540725		2014.72	2014-09-17	2014-09-17T20:17:25	1410985045151	1.54757	1.48222	2.61942	0.834404		2013.54	2013-07-15	2013-07-15T17:02:59	1373907779330	1.55474
2014.57	2014-07-25	2014-07-25T14:14:33	1406297673126	1.21001	1.13114	2.10895	0.627869		2013.88	2013-11-16	2013-11-16T00:58:32	1384563512422	1.70115	1.52931	3.87756	0.668425		2013.92	2013-12-01	2013-12-01T23:03:44	1385939024653	6.11279	5.96985	10.9571	1.68844		2013.37	2013-05-14	2013-05-14T17:56:43	1368554203405	0.984949	0.933178	1.74356	0.540725		2014.62	2014-08-14	2014-08-14T10:23:24	1408011804740	0.950045	0.827383	2.40019	0.403641		2013.43	2013-06-06	2013-06-06T05:58:55	1370498335790	1.55474
2014.47	2014-06-20	2014-06-20T22:48:20	1403304500943	1.39557	1.1652	4.7212	0.674029		2013.78	2013-10-09	2013-10-09T11:20:17	1381317617444	1.70115	1.52931	3.87756	0.668425		2013.82	2013-10-25	2013-10-25T13:52:04	1382709124003	6.32431	6.09435	11.0218	3.36403		2013.26	2013-04-05	2013-04-05T00:35:53	1365122153669	0.984949	0.933178	1.74356	0.540725		2014.53	2014-07-11	2014-07-11T00:29:24	1405038564328	0.852311	0.809278	1.54313	0.403641		2013.32	2013-04-27	2013-04-27T18:54:52	1367088892250	1.55474
2014.38	2014-05-17	2014-05-17T07:22:08	1400311328760	1.57052	1.19284	5.45015	0.705969		2013.67	2013-09-01	2013-09-01T21:42:02	1378071722466	1.8471	1.71041	3.87756	0.705224		2013.72	2013-09-18	2013-09-18T04:40:23	1379479223353	6.34181	6.09605	11.0218	3.4309		2013.15	2013-02-24	2013-02-24T07:15:03	1361690103932	0.984949	0.933178	1.74356	0.540725		2014.43	2014-06-06	2014-06-06T14:35:23	1402065323916	0.968266	0.84568	2.71762	0.440646		2013.22	2013-03-19	2013-03-19T07:50:48	1363679448709	1.55474
2014.28	2014-04-12	2014-04-12T15:55:56	1397318156577	1.66291	1.22305	5.79501	0.724123		2013.57	2013-07-26	2013-07-26T08:03:47	1374825827488	0.823004	0.737602	1.90216	0.374733		2013.61	2013-08-11	2013-08-11T19:28:42	1376249322704	3.49661	2.69345	10.7606	1.40861		2013.04	2013-01-15	2013-01-15T13:54:14	1358258054196	0.984949	0.933178	1.74356	0.540725		2014.34	2014-05-03	2014-05-03T04:41:23	1399092083504	1.60405	1.0856	4.64636	0.53582		2013.11	2013-02-07	2013-02-07T20:46:45	1360270005169	1.55474
2014.19	2014-03-09	2014-03-09T00:29:44	1394324984394	2.75582	1.72166	7.1332	0.750845		2013.47	2013-06-18	2013-06-18T18:25:32	1371579932510	0.780883	0.734922	1.42759	0.374733		2013.51	2013-07-05	2013-07-05T10:17:02	1373019422054	1.14792	1.06896	1.99335	0.59279		2012.94	2012-12-05	2012-12-05T20:33:24	1354739604460	0.984949	0.933178	1.74356	0.540725		2014.24	2014-03-29	2014-03-29T18:47:23	1396118843092	2.40378	2.20443	5.85552	0.685814		2013	2012-12-29	2012-12-29T09:42:41	1356774161629	1.55474
2014.09	2014-02-02	2014-02-02T09:03:32	1391331812211	4.24149	4.22902	7.71092	1.10434		2013.36	2013-05-12	2013-05-12T04:47:17	1368334037532	0.780883	0.734922	1.42759	0.374733		2013.41	2013-05-29	2013-05-29T01:05:21	1369789521405	1.10175	1.06855	1.78346	0.59279		2012.83	2012-10-27	2012-10-27T03:12:34	1351307554724	0.984949	0.933178	1.74356	0.540725		2014.15	2014-02-23	2014-02-23T08:53:22	1393145602680	2.82434	2.66312	6.15036	0.889974		2012.89	2012-11-19	2012-11-19T22:38:38	1353364718089	1.55474
2014	2013-12-29	2013-12-29T17:37:20	1388338640028	4.54576	4.39282	7.74545	2.12382		2013.26	2013-04-04	2013-04-04T15:09:02	1365088142554	0.780883	0.734922	1.42759	0.374733		2013.31	2013-04-21	2013-04-21T15:53:40	1366559620755	1.09789	1.06855	1.78045	0.59279		2012.72	2012-09-17	2012-09-17T09:51:44	1347875504988	0.984949	0.933178	1.74356	0.540725		2014.06	2014-01-19	2014-01-19T22:59:22	1390172362268	3.039	2.86402	6.33713	1.10786		2012.78	2012-10-11	2012-10-11T11:34:34	1349955274548	1.55474
2013.9	2013-11-25	2013-11-25T02:11:07	1385345467845	4.58175	4.41609	7.75996	2.30509		2013.16	2013-02-26	2013-02-26T01:30:47	1361842247576	0.780883	0.734922	1.42759	0.374733		2013.2	2013-03-15	2013-03-15T06:42:00	1363329720105	1.09789	1.06855	1.78045	0.59279		2012.61	2012-08-08	2012-08-08T16:30:55	1344443455252	0.984949	0.933178	1.74356	0.540725		2013.96	2013-12-16	2013-12-16T13:05:21	1387199121856	3.10539	2.90492	6.35708	1.25119		2012.68	2012-09-02	2012-09-02T00:30:31	1346545831008	1.55474
2013.81	2013-10-21	2013-10-21T10:44:55	1382352295662	4.52171	4.41609	7.75996	1.81117		2013.05	2013-01-19	2013-01-19T11:52:32	1358596352598	0.780883	0.734922	1.42759	0.374733		2013.1	2013-02-05	2013-02-05T21:30:19	1360099819456	1.09789	1.06855	1.78045	0.59279		2012.5	2012-06-29	2012-06-29T23:10:05	1341011405515	0.984949	0.933178	1.74356	0.540725		2013.87	2013-11-12	2013-11-12T03:11:21	1384225881444	3.13648	2.92483	6.35708	1.32178		2012.57	2012-07-24	2012-07-24T13:26:27	1343136387468	1.55474
2013.71	2013-09-16	2013-09-16T19:18:43	1379359123479	1.00068	0.794614	3.30725	0.445514		2012.95	2012-12-11	2012-12-11T22:14:17	1355264057620	0.780883	0.734922	1.42759	0.374733		2013	2012-12-30	2012-12-30T12:18:38	1356869918806	1.09789	1.06855	1.78045	0.59279		2012.39	2012-05-21	2012-05-21T05:49:15	1337579355779	0.984949	0.933178	1.74356	0.540725		2013.77	2013-10-08	2013-10-08T17:17:21	1381252641032	3.14212	2.93001	6.35708	1.33095		2012.46	2012-06-15	2012-06-15T02:22:23	1339726943928	1.55474
2013.62	2013-08-13	2013-08-13T03:52:31	1376365951296	0.811776	0.779286	1.36805	0.445514		2012.85	2012-11-04	2012-11-04T08:36:02	1352018162642	0.781298	0.734922	1.42759	0.374733		2012.9	2012-11-22	2012-11-22T03:06:58	1353553618156	1.09789	1.06855	1.78045	0.59279		2012.28	2012-04-11	2012-04-11T12:28:26	1334147306043	0.984848	0.933178	1.74356	0.53975		2013.68	2013-09-04	2013-09-04T07:23:20	1378279400621	3.17025	2.95381	6.35708	1.42025		2012.35	2012-05-06	2012-05-06T15:18:20	1336317500387	1.55602
2013.52	2013-07-09	2013-07-09T12:26:19	1373372779113	0.811776	0.779286	1.36805	0.445514		2012.75	2012-09-27	2012-09-27T18:57:47	1348772267664	0.782828	0.73757	1.42759	0.374733		2012.8	2012-10-15	2012-10-15T17:55:17	1350323717507	1.09853	1.06855	1.78045	0.59381		2012.17	2012-03-02	2012-03-02T19:07:36	1330715256307	0.984972	0.933178	1.76559	0.53975		2013.58	2013-07-31	2013-07-31T21:29:20	1375306160209	1.47466	0.872721	4.1035	0.387368		2012.24	2012-03-28	2012-03-28T04:14:16	1332908056847	1.55759
2013.43	2013-06-04	2013-06-04T21:00:06	1370379606931	0.811776	0.779286	1.36805	0.445514		2012.64	2012-08-21	2012-08-21T05:19:32	1345526372686	0.784875	0.737841	1.42759	0.38546		2012.69	2012-09-08	2012-09-08T08:43:36	1347093816857	1.09894	1.06863	1.78045	0.59381		2012.06	2012-01-23	2012-01-23T01:46:46	1327283206571	0.985231	0.933178	1.74356	0.541253		2013.49	2013-06-27	2013-06-27T11:35:19	1372332919797	0.807621	0.754306	1.48466	0.386972		2012.13	2012-02-17	2012-02-17T17:10:13	1329498613307	1.55894
[truncated: 19 more columns]
