# Supplementary material for: A decade of genomic surveillance tracks the disappearance and reintroduction of seasonal influenza virus in Aotearoa New Zealand
Source: Research Square preprint supplement (doi:10.21203/rs.3.rs-7503135/v1), 2025-09-03
Supplement: Supplementary file 3 [file e75ec981b808c947e964017f.xlsx]

## Sheet: Sheet1
A(H3N2) Accession	A(H3N2) clade		A(H1N1)09pdm Accession	A(H1N1)09pdm clade		B/Victoria Accession	B/Victoria clade		B/Yamagata Accession	B/Yamagata clade
13CF5071	3C.3		13CF5131	6B		14CF0915	V1A		15CF1756	Y3
13CF5072	3C.3		13CF5325	6B		15CF0427	V1A		14CF0267	Y3
13CF5081	3C.3		13CF5405	6B		15CF0544	V1A		14CF0833	Y3
13CF5082	3C.3		13CF5467	6B		15CF0880	V1A		14CF1158	Y3
13CF5085	3C.3		13CF5931	6B		15CF1361	V1A		14CF1417	Y3
13CF5093	3C.3		14CF0990	6B		15CF1506	V1A		14CF1174	Y3
13CF5094	3C.3		14CF1271	6B		15CF1753	V1A		14CF0984	Y3
13CF5105	3C.3		14HB1144	6B		15CF0938	V1A		14CF1374	Y3
13CF5117	3C.3		14HB1145	6B		15CF1044	V1A		14CF1413	Y3
13CF5126	3C.3		14HB1170	6B		15CF1465	V1A		14HB1122	Y3
13CF5133	3C.3		14CF1071	6B		15CF2103	V1A		14CF1091	Y3
13CF5138	3C.3		14CF0265	6B		15CF1086	V1A		14CF1287	Y3
13CF5141	3C.3		14CF0489	6B		15CF1912	V1A		14CF1194	Y3
13CF5144	3C.3		14HB0111	6B		15CF1940	V1A		14CF1370	Y3
13CF5157	3C.3		14CF0486	6B		15HB0677	V1A		14CF1434	Y3
13CF5160	3C.3		14CF1242	6B		15HB1528	V1A		14CF1225	Y3
13CF5163	3C.3		14CF0209	6B		15HB1344	V1A		15CF1939	Y3
13CF5164	3C.3		14CF0313	6B		15CF1075	V1A		15CF0909	Y3
13CF5170	3C.3		14CF0331	6B		15CF1929	V1A		15CF0398	Y3
13CF5171	3C.3		14CF0347	6B		15CF1890	V1A		15CF0443	Y3
13CF5174	3C.3		14CF0462	6B		15CF0537	V1A		15CF0459	Y3
13CF5200	3C.3		14CF0546	6B		15CF0893	V1A		15CF1232	Y3
13CF5214	3C.3		14CF0547	6B		15CF0953	V1A		16CF0042	Y3
13CF5216	3C.3		14CF0590	6B		15CF0954	V1A		15CF1025	Y3
13CF5218	3C.3		14CF0640	6B		15CF1130	V1A		15CF1597	Y3
13CF5220	3C.3		14CF0704	6B		15CF1299	V1A		15CF1837	Y3
13CF5222	3C.3		14CF0705	6B		15CF1309	V1A		15CF0594	Y3
13CF5229	3C.3		14CF0831	6B		15CF1326	V1A		15CF1638	Y3
13CF5230	3C.3		14CF1003	6B		15CF1352	V1A		15HB0746	Y3
13CF5231	3C.3		14CF1054	6B		15CF1381	V1A		15CF1081	Y3
13CF5236	3C.3		14CF1070	6B		15CF1450	V1A		15CF1203	Y3
13CF5244	3C.3		14CF1077	6B		15CF1627	V1A		15CF1379	Y3
13CF5251	3C.3		14CF1080	6B		15CF1668	V1A		15CF1227	Y3
13CF5258	3C.3		14CF1164	6B		15CF1669	V1A		15CF1456	Y3
13CF5260	3C.3		14CF1301	6B		15CF1702	V1A		15CF1386	Y3
13CF5261	3C.3		14CF1406	6B		15CF1703	V1A		15CF1221	Y3
13CF5262	3C.3		14HB0529	6B		15CF1750	V1A		15CF1351	Y3
13CF5269	3C.3		14HB0843	6B		15CF1761	V1A		15CF1475	Y3
13CF5279	3C.3		14HB0850	6B		15CF1766	V1A		15CF1372	Y3
13CF5280	3C.3		14HB0988	6B		15CF1783	V1A		15CF1637	Y3
13CF5298	3C.3		14HB1148	6B		15CF1827	V1A		15CF0761	Y3
13CF5302	3C.3		14HB1473	6B		15CF1855	V1A		15CF1198	Y3
13CF5303	3C.3		14HB1563	6B		15CF1903	V1A		15CF2002	Y3
13CF5304	3C.3		14CF0493	6B		15CF2036	V1A		15CF0858	Y3
13CF5306	3C.3		14CF0550	6B		15CF2114	V1A		15CF1076	Y3
13CF5310	3C.3		14CF0719	6B		15HB1901	V1A		15CF1408	Y3
13CF5311	3C.3		14CF0869	6B		15CF1071	V1A		15CF0542	Y3
13CF5337	3C.3		14HB1338	6B		15CF1219	V1A		15CF0774	Y3
13CF5347	3C.3		14CF0790	6B		15CF1587	V1A		15CF1157	Y3
13CF5380	3C.3		14CF0879	6B		15CF2005	V1A		15CF1305	Y3
13CF5389	3C.3		14CF0995	6B		15CF1530	V1A		15CF1158	Y3
13CF5391	3C.3		14CF1026	6B		15CF1120	V1A		15CF1821	Y3
13CF5395	3C.3		14CF1076	6B		15CF1626	V1A		15CF1239	Y3
13CF5397	3C.3		14CF1361	6B		15CF1640	V1A		15CF1634	Y3
13CF5398	3C.3		14HB1385	6B		15CF1671	V1A		15CF1430	Y3
13CF5400	3C.3		14CF1102	6B		15CF1687	V1A		15CF1564	Y3
13CF5416	3C.3		14CF1199	6B		15CF1857	V1A		15CF1445	Y3
13CF5422	3C.3		14CF1131	6B		15CF1898	V1A		15CF1916	Y3
13CF5493	3C.3		14CF1172	6B		15CF1834	V1A		15HB1366	Y3
13CF5496	3C.3		14CF1189	6B		15CF1836	V1A		15CF1764	Y3
13CF5508	3C.3		14CF1208	6B		15CF1842	V1A		15CF0399	Y3
13CF5514	3C.3		14CF1226	6B		15CF1854	V1A		15CF0328	Y3
13CF5520	3C.3		14CF1232	6B		15CF2018	V1A		15CF0515	Y3
13CF5525	3C.3		14CF1260	6B		15CF2021	V1A		15CF0547	Y3
13CF5529	3C.3		14HB0832	6B		15HB2408	V1A		15CF0475	Y3
13CF5558	3C.3		14HB0877	6B		15CF2024	V1A		15CF1928	Y3
13CF5562	3C.3		14HB1243	6B		15HB1551	V1A		16CF0085	Y3
13CF5565	3C.3		14HB1444	6B		15CF1385	V1A		14CF1201	Y3
13CF5570	3C.3		14CF0792	6B		16HB2347	V1A		16CF0374	Y3
13CF5579	3C.3		14CF0629	6B		15CF0834	V1A		16CF0724	Y3
13CF5581	3C.3		14CF0595	6B		15CF0862	V1A		17CF0063	Y3
13CF5600	3C.3		14CF0621	6B		15CF0958	V1A		17CF0414	Y3
13CF5603	3C.3		14CF1179	6B		15CF0980	V1A		17CF0144	Y3
13CF5604	3C.3		14CF0750	6B		15CF0986	V1A		17CF0273	Y3
13CF5609	3C.3		14CF1185	6B		15CF1092	V1A		17CF0564	Y3
13CF5632	3C.3		14CF1188	6B		15CF1141	V1A		17CF1280	Y3
13CF5641	3C.3		14CF1262	6B		15CF1149	V1A		17CF1028	Y3
13CF5650	3C.3		14HB1249	6B		15CF1228	V1A		17CF1198	Y3
13CF5652	3C.3		14HB1263	6B		15CF1570	V1A		17CF1206	Y3
13CF5689	3C.3		14CF0520	6B		15CF1623	V1A		17CF1368	Y3
13CF5693	3C.3		14CF0710	6B		15CF1635	V1A		17CF0345	Y3
13CF5708	3C.3		14CF1109	6B		15CF1641	V1A		17CF1204	Y3
13CF5709	3C.3		14CF1063	6B		15CF1670	V1A		17CF1293	Y3
13CF5713	3C.3		14CF1148	6B		15CF1745	V1A		17CF1319	Y3
13CF5715	3C.3		14CF1400	6B		15CF1755	V1A		17CF0942	Y3
13CF5716	3C.3		14CF1341	6B		15CF1935	V1A		17CF0715	Y3
13CF5720	3C.3		14CF0439	6B		15HB1765	V1A		17CF1205	Y3
13CF5741	3C.3		14CF0533	6B		15HB1960	V1A		17CF1623	Y3
13CF5764	3C.3		14CF0730	6B		15HB2067	V1A		17CF1726	Y3
13CF5774	3C.3		14CF0809	6B		15HB2088	V1A		17CF1855	Y3
13CF5833	3C.3		14CF0953	6B		15HB2206	V1A		17CF1888	Y3
13CF5847	3C.3		14CF1200	6B		15CF1752	V1A		17CF1704	Y3
13CF5880	3C.3		14CF1229	6B		15CF1022	V1A		16CF0787	Y3
13CF5907	3C.3		14CF1249	6B		15CF1458	V1A		17CF0185	Y3
13HB4239	3C.3		14CF1275	6B		15CF1565	V1A		17CF0012	Y3
13HB4495	3C.3		14CF1282	6B		15CF1846	V1A		17CF1718	Y3
13HB4688	3C.3		14HB1216	6B		15HB1662	V1A		17CF1753	Y3
13HB4697	3C.3		14CF0541	6B		15CF1612	V1A		17CF0635	Y3
13HB4700	3C.3		14CF1272	6B		15CF2054	V1A		17CF0959	Y3
13HB4701	3C.3		14CF0587	6B		15HB2506	V1A		17CF0740	Y3
13HB4703	3C.3		14CF0768	6B		15CF0937	V1A		17CF0446	Y3
13HB4704	3C.3		14CF0875	6B		15CF1303	V1A		17CF0557	Y3
13HB4772	3C.3		14CF0987	6B		15CF1722	V1A		17CF0558	Y3
13HB4775	3C.3		14CF1095	6B		15CF1776	V1A		17CF1145	Y3
13HB4783	3C.3		14CF1096	6B		15CF1978	V1A		17CF1265	Y3
13HB4793	3C.3		14CF1292	6B		15CF1993	V1A		17CF1596	Y3
13HB4805	3C.3		14HB1164	6B		15CF1994	V1A		17CF0389	Y3
13HB4812	3C.3		14CF1403	6B		15CF2065	V1A		17CF0474	Y3
13HB4862	3C.3		14CF0678	6B		15CF1339	V1A		17CF0475	Y3
13HB4890	3C.3		14CF0866	6B		15CF2073	V1A		17CF0748	Y3
13HB4899	3C.3		14CF0755	6B		15CF1785	V1A		17CF1812	Y3
13HB4902	3C.3		14CF0949	6B		15CF1964	V1A		17CF1125	Y3
13HB4903	3C.3		14CF0950	6B		15HB2185	V1A		17CF1817	Y3
13HB4918	3C.3		14CF1289	6B		15HB1903	V1A		17CF1339	Y3
13HB4978	3C.3		14CF0994	6B		15HB2378	V1A		18CF0462	Y3
13HB4992	3C.3		14CF1132	6B		15HB2971	V1A		17CF0222	Y3
13HB4993	3C.3		14HB1384	6B		16CF0471	V1A		17CF0327	Y3
13HB4995	3C.3		14HB1490	6B		16CF0613	V1A		17CF0435	Y3
13HB4998	3C.3		14CF0772	6B		16CF0650	V1A		17CF0796	Y3
13HB5005	3C.3		14CF1455	6B		16CF0651	V1A		17CF1015	Y3
13HB5007	3C.3		14CF1489	6B		16CF0792	V1A		17CF0592	Y3
13HB5012	3C.3		14HB1650	6B		15CF0719	V1A		17CF0455	Y3
13HB5013	3C.3		14HB1609	6B		17CF0808	V1A		17CF0458	Y3
13HB5113	3C.3		14CF0645	6B		15CF0762	V1A		17CF1430	Y3
13HB5129	3C.3		14CF1079	6B		17CF0290	V1A		17CF1227	Y3
13HB5130	3C		14CF0997	6B		17CF0397	V1A		17CF0060	Y3
13HB5139	3C.3		14CF1304	6B		17CF0418	V1A		17CF0331	Y3
13HB5141	3C.3		14CF1311	6B		17CF0543	V1A		17CF0789	Y3
13HB5142	3C.3		13HB5701	6B		17CF0982	V1A		17CF0888	Y3
13HB5151	3C.3		14CF1473	6B		17CF1196	V1A		17CF1009	Y3
13HB5206	3C.3		14HB1397	6B		17CF1512	V1A		17CF1135	Y3
13HB5211	3C.3		14HB1406	6B		15CF1304	V1A		17CF1468	Y3
13HB5267	3C.3		14CF0674	6B		16CF0492	V1A		17CF0333	Y3
13HB5276	3C.3		14CF1173	6B		17CF1475	V1A		17CF0624	Y3
13HB5319	3C.3		14CF0202	6B		18VR0138	V1A		17CF0757	Y3
13HB5328	3C.3		14CF0220	6B		19CF0702	V1A		17CF0320	Y3
13HB5709	3C.3		14CF0544	6B		18CF0102	V1A.1		17CF0416	Y3
13HB5710	3C.3		14CF0805	6B		18CF0103	V1A.1		17CF0737	Y3
13HB5739	3C.3		14CF0272	6B		19CF0155	V1A.3		17CF0953	Y3
14CF0613	3C.3b		14CF0460	6B		19CF0210	V1A.3		17CF1679	Y3
14CF0661	3C.3b		14CF0386	6B		19CF0233	V1A.3		17CF0209	Y3
14CF0847	3C.2a		14CF0490	6B		19CF0326	V1A.3		17CF1264	Y3
14CF0952	3C.3a		14CF0782	6B		19CF0348	V1A.3		17CF1393	Y3
14CF1002	3C.3a		14CF0868	6B		19CF0374	V1A.3		17CF0272	Y3
14CF1044	3C.3a		14CF0548	6B		19CF0499	V1A.3		17CF1614	Y3
14CF1061	3C.3a		14HB1139	6B		19CF0576	V1A.3		17CF0815	Y3
14CF1072	3C.3b		14CF0269	6B		19CF0588	V1A.3		17CF0587	Y3
14CF1085	3C.3b		14CF0325	6B		19CF0618	V1A.3		17CF0721	Y3
14CF1145	3C.2a		14CF0329	6B		19CF0642	V1A.3		17CF1458	Y3
14CF1146	3C.3a		14CF0390	6B		19CF0654	V1A.3		17CF0841	Y3
14CF1156	3C.3		14CF0427	6B		19CF0671	V1A.3		17CF1434	Y3
14CF1169	3C.3a		14CF0442	6B		19CF0739	V1A.3		17CF1499	Y3
14CF1176	3C.3a		14CF0480	6B		19CF0866	V1A.3		17CF1775	Y3
14CF1222	3C.3b		14CF0522	6B		19CF0888	V1A.3		17CF1306	Y3
14CF1228	3C.3a		14CF0551	6B		19CF0895	V1A.3		17CF0095	Y3
14CF1230	3C.3a		14CF0567	6B		19CF0945	V1A.3		17CF0117	Y3
14CF1237	3C.3a		14CF0643	6B		19CF0961	V1A.3		17CF0323	Y3
14CF1238	3C.3a		14CF0659	6B		19CF1015	V1A.3		17CF0434	Y3
14CF1240	3C.3a		14CF0663	6B		19CF1022	V1A.3		17CF1141	Y3
14CF1248	3C.3a		14CF0691	6B		19CF1073	V1A.3		17CF1207	Y3
14CF1308	3C.3a		14CF0702	6B		19CF1074	V1A.3		17CF0454	Y3
14CF1317	3C.2a		14CF0742	6B		19CF1076	V1A.3		17CF0692	Y3
14CF1337	3C.3a		14CF0839	6B		19CF1081	V1A.3		17CF0177	Y3
14CF1359	3C.2a		14CF0864	6B		19CF1096	V1A.3		17CF1184	Y3
14CF1368	3C.2a		14CF1104	6B		19CF1118	V1A.3		14CF0469	Y3
14CF1379	3C.3a		14CF1147	6B		19CF1130	V1A.3		14CF0624	Y3
14CF1381	3C.2a		14CF1196	6B		19CF1214	V1A.3		14CF1206	Y3
14CF1384	3C.2a		14CF1198	6B		19CF1225	V1A.3		14CF1221	Y3
14CF1385	3C.3a		14CF1204	6B		19CF1229	V1A.3		14CF1270	Y3
14CF1404	3C.3a		14HB0594	6B		19CF1292	V1A.3		14HB0818	Y3
14CF1410	3C.3a		14HB0673	6B		19CF1320	V1A.3		14HB1532	Y3
14CF1412	3C.3a		14HB0683	6B		19CF1402	V1A.3		14CF1220	Y3
14CF1447	3C.3a		14HB0696	6B		19CF1432	V1A.3		15CF1423	Y3
14CF1448	3C.3		14HB0773	6B		19CF1795	V1A.3		14CF0482	Y3
14CF1454	3C.3a		14HB0793	6B		19CF0219	V1A.3		14CF0964	Y3
14CF1499	3C.3a		14HB0839	6B		19CF0669	V1A.3		14CF0528	Y3
14CF1523	3C.2a		14HB0852	6B		19CF0197	V1A.3		14CF0539	Y3
14CF1525	3C.3a		14HB0881	6B		19CF0198	V1A.3		14CF0724	Y3
14CF1527	3C.2a		14HB1089	6B		19CF0816	V1A.3		14CF0887	Y3
14HB0784	3C.3		14HB1272	6B		19CF0697	V1A.3		14CF1297	Y3
14HB1157	3C.3b		14HB1446	6B		19CF0298	V1A.3		14CF1392	Y3
14HB1308	3C.3a		14CF0342	6B		19CF0416	V1A.3		14CF1418	Y3
14HB1371	3C.3a		14CF0358	6B		19CF0660	V1A.3		14HB0967	Y3
14HB1443	3C.3a		14CF0731	6B		19CF1059	V1A.3		14HB1437	Y3
14HB1484	3C.3a		14CF1165	6B		19CF1179	V1A.3		14HB1524	Y3
14HB1485	3C.3a		14HB0221	6B		19CF1260	V1A.3		14CF0791	Y3
14HB1604	3C.3a		14CF0426	6B		19CF1305	V1A.3		14CF1346	Y3
14HB1619	3C.3a		14CF0475	6B		19CF1552	V1A.3		14CF1330	Y3
14HB1704	3C.3a		14CF0558	6B		19CF0546	V1A.3		14HB1552	Y3
15CF0008	3C.2a		14CF0603	6B		19CF1208	V1A.3		14CF0474	Y3
15CF0041	3C.2a		14CF0708	6B		19CF0705	V1A.3		15CF0457	Y3
15CF0152	3C.2a		14CF0754	6B		19CF0772	V1A.3		15CF0143	Y3
15CF0202	3C.2a		14CF0771	6B		19CF1020	V1A.3		15CF1504	Y3
15CF0274	3C.2a		14HB1238	6B		19CF1061	V1A.3		15HB1932	Y3
15CF0277	3C.2a		14CF0633	6B		19CF1099	V1A.3		15CF1030	Y3
15CF0280	3C.2a		14CF0658	6B		19CF1111	V1A.3		15CF1933	Y3
15CF0282	3C.2a		14CF1155	6B		19CF1603	V1A.3		15HB1559	Y3
15CF0324	3C.2a		14CF0660	6B		19CF0341	V1A.3		15CF1796	Y3
15CF0381	3C.2a		14CF0672	6B		19CF0745	V1A.3		15CF0886	Y3
15CF0382	3C.2a		14CF0675	6B		19CF1668	V1A.3		15CF1034	Y3
15CF0385	3C.2a		14CF0746	6B		19CF1175	V1A.3		15CF1617	Y3
15CF0400	3C.2a		14CF0877	6B		19CF1218	V1A.3		15CF2069	Y3
15CF0406	3C.2a		14CF1128	6B		19CF1269	V1A.3		15HB1339	Y3
15CF0407	3C.2a		14CF1142	6B		19CF1275	V1A.3		15CF1151	Y3
15CF0430	3C.2a		14CF1159	6B		19CF1351	V1A.3		15HB2551	Y3
15CF0432	3C.2a		14CF1227	6B		19CF1365	V1A.3		15CF1280	Y3
15CF0460	3C.2a		14CF1184	6B		19CF1405	V1A.3		15CF1965	Y3
15CF0461	3C.2a		14CF1205	6B		19CF0491	V1A.3		15CF1856	Y3
15CF0476	3C.2a		14CF1216	6B		19CF0876	V1A.3		15CF0108	Y3
15CF0500	3C.2a		14CF1219	6B		19CF0991	V1A.3		15HB1071	Y3
15CF0501	3C.2a		14HB0789	6B		19CF0213	V1A.3		15CF0597	Y3
15CF0518	3C.2a		14HB0857	6B		19CF0693	V1A.3		15CF0780	Y3
15CF0519	3C.2a		14HB0987	6B		19CF0547	V1A.3		15CF0376	Y3
15CF0520	3C.2a		14HB1171	6B		19CF0789	V1A.3		15CF0439	Y3
15CF0524	3C.2a		14HB1222	6B		19CF0980	V1A.3		15CF0444	Y3
15CF0526	3C.2a		14HB0934	6B		19CF1049	V1A.3		15CF1705	Y3
15CF0529	3C.2a		14HB1207	6B		19CF0833	V1A.3		15HB2356	Y3
15CF0531	3C.2a		14HB1278	6B		19CF0849	V1A.3		15CF1079	Y3
15CF0532	3C.2a		14HB1471	6B		19CF0785	V1A.3		15CF1272	Y3
15CF0533	3C.2a		14HB1603	6B		19CF0918	V1A.3		15CF1415	Y3
15CF0536	3C.2a		14HB1401	6B		19CF0981	V1A.3		15CF1709	Y3
15CF0553	3C.2a		14CF0850	6B		19CF0470	V1A.3		15CF1840	Y3
15CF0555	3C.2a		14CF0957	6B		19CF0324	V1A.3		15CF1278	Y3
15CF0556	3C.2a		14HB1387	6B		19CF1187	V1A.3		15CF1684	Y3
15CF0557	3C.2a		14HB1315	6B		19CF1689	V1A.3		15CF1208	Y3
15CF0559	3C.2a		14CF0344	6B		19CF0934	V1A.3		15CF1297	Y3
15CF0560	3C.2a		14CF0549	6B		19CF0254	V1A.3		15CF1360	Y3
15CF0561	3C.2a		14CF0747	6B		19CF1288	V1A.3		15CF1666	Y3
15CF0562	3C.2a		14CF1133	6B		19CF1296	V1A.3		15CF1983	Y3
15CF0563	3C.2a		14HB0703	6B		19CF1399	V1A.3		15CF1777	Y3
15CF0565	3C.2a		14CF0370	6B		19CF1507	V1A.3		15CF0870	Y3
15CF0566	3C.2a		14CF1069	6B		19CF1608	V1A.3		15CF1508	Y3
15CF0568	3C.2a		14CF1151	6B		19CF0212	V1A.3		15CF2068	Y3
15CF0569	3C.2a		14HB1143	6B		19CF0734	V1A.3		16CF0608	Y3
15CF0571	3C.2a		14CF0664	6B		19CF0856	V1A.3		16CF0795	Y3
15CF0572	3C.2a		14CF1118	6B		19CF1376	V1A.3		16CF0751	Y3
15CF0598	3C.2a		14CF0638	6B		19CF0741	V1A.3		16CF0884	Y3
15CF0600	3C.2a		14CF0718	6B		19CF1189	V1A.3		16HB2132	Y3
15CF0603	3C.2a		14CF0886	6B		19CF1609	V1A.3		17CF0075	Y3
15CF0604	3C.2a		14CF0630	6B		19CF0944	V1A.3		17CF0431	Y3
15CF0607	3C.2a		13CF5139	6B		19CF1782	V1A.3		16HB0587	Y3
15CF0609	3C.2a		14HB1339	6B		19CF0497	V1A.3		17CF1224	Y3
15CF0611	3C.2a		14CF0463	6B		19CF0942	V1A.3		17CF0031	Y3
15CF0613	3C.2a		15HB2034	6B		19CF0817	V1A.3		17CF0151	Y3
15CF0614	3C.2a		16CF0052	6B.1		19CF1422	V1A.3		17CF0716	Y3
15CF0617	3C.2a		16CF0203	6B.1		19CF0984	V1A.3		17CF1209	Y3
15CF0619	3C.2a		16CF0396	6B.1		19CF0988	V1A.3		17CF1484	Y3
15CF0620	3C.2a		16CF0649	6B.1		19CF1200	V1A.3		17CF1839	Y3
15CF0621	3C.2a		16HB1379	6B.1		19CF1442	V1A.3		17CF0259	Y3
15CF0623	3C.2a		16CF0371	6B.1		19CF1455	V1A.3		17CF0346	Y3
15CF0628	3C.2a		16CF0647	6B.1		19CF1456	V1A.3		17CF0265	Y3
15CF0630	3C.2a		16HB1589	6B.1		19CF1197	V1A.3		17CF0396	Y3
15CF0631	3C.2a		16CF0277	6B.1		19CF1642	V1A.3		17CF0445	Y3
15CF0632	3C.2a		16CF0840	6B.1		19CF1109	V1A.3		17CF0370	Y3
15CF0635	3C.2a		16CF0842	6B.1		19CF1509	V1A.3		17CF0956	Y3
15CF0640	3C.2a		16CF0148	6B.1		19CF1524	V1A.3		17CF0980	Y3
15CF0642	3C.2a		16CF0153	6B.1		19CF1623	V1A.3		17CF1893	Y3
15CF0643	3C.2a		16CF0168	6B.1		19CF1005	V1A.3		17CF1896	Y3
15CF0644	3C.2a		16HB0830	6B.1		19CF1790	V1A.3		17CF0183	Y3
15CF0659	3C.2a		16HB1172	6B.1		19CF0300	V1A.3		17CF1586	Y3
15CF0660	3C.2a		16HB1178	6B.1		19CF0522	V1A.3		17CF0955	Y3
15CF0666	3C.2a		16CF0260	6B.1		19CF0523	V1A.3		17CF1157	Y3
15CF0691	3C.2a		16CF0771	6B.1		19CF0528	V1A.3		17CF0015	Y3
15CF0692	3C.2a		16HB1171	6B.1		19CF1764	V1A.3		17CF1678	Y3
15CF0695	3C.2a		16HB1288	6B.1		19CF1745	V1A.3		17CF1477	Y3
15CF0696	3C.2a		16CF0539	6B.1		19CF0746	V1A.3		18VR0390	Y3
15CF0700	3C.2a		16CF0638	6B.1		19CF0204	V1A.3		18CF0233	Y3
15CF0703	3C.2a		16HB1723	6B.1		19CF0325	V1A.3		17CF0598	Y3
15CF0712	3C.2a		16HB2046	6B.1		19CF0486	V1A.3		15CF0393	Y3
15CF0721	3C.2a		16HB1514	6B.1		19CF0591	V1A.3		15CF0426	Y3
15CF0726	3C.2a		16CF0088	6B.1		19CF0677	V1A.3		15CF0436	Y3
15CF0729	3C.2a		17HB0352	6B.1		19CF0729	V1A.3		17CF1281	Y3
15CF0736	3C.2a		17HB0469	6B.1		19CF0738	V1A.3		17CF1793	Y3
15CF0738	3C.2a		16CF0075	6B.1		19CF0807	V1A.3		18CF0893	Y3
15CF0741	3C.2a		16CF0267	6B.1		19CF0886	V1A.3		17CF1435	Y3
15CF0742	3C.2a		16HB0583	6B.1		19CF0889	V1A.3		17CF1798	Y3
15CF0745	3C.2a		16CF0212	6B.1		19CF1000	V1A.3		18HB0199	Y3
15CF0748	3C.2a		16CF0383	6B.1		19CF1029	V1A.3		18VR0501	Y3
15CF0753	3C.2a		16CF0313	6B.1		19CF1060	V1A.3		18CF0702	Y3
15CF0754	3C.2a		16CF0336	6B.1		19CF1086	V1A.3		17CF0449	Y3
15CF0756	3C.2a		16CF0433	6B.1		19CF1091	V1A.3		17CF0512	Y3
15CF0763	3C.2a		16CF0679	6B.1		19CF1125	V1A.3		17CF1629	Y3
15CF0764	3C.2a		17CF1898	6B.1		19CF1168	V1A.3		17CF0570	Y3
15CF0766	3C.2a		17HB0531	6B.1		19CF1191	V1A.3		17CF0649	Y3
15CF0767	3C.2a		16CF0596	6B.1		19CF1219	V1A.3		17CF0969	Y3
15CF0769	3C.2a		16CF0617	6B.1		19CF1221	V1A.3		17CF1219	Y3
15CF0770	3C.2a		16CF0815	6B.1		19CF1250	V1A.3		17CF1334	Y3
15CF0773	3C.2a		16CF0418	6B.1		19CF1306	V1A.3		17CF1532	Y3
15CF0790	3C.2a		16CF0467	6B.1		19CF1317	V1A.3		17CF0574	Y3
15CF0799	3C.2a		16CF0533	6B.1		19CF1339	V1A.3		17CF1029	Y3
15CF0809	3C.2a		16CF0614	6B.1		19CF1354	V1A.3		17CF1479	Y3
15CF0832	3C.2a		16HB2236	6B.1		19CF1355	V1A.3		17CF1315	Y3
15CF0833	3C.2a		17CF0073	6B.1		19CF1367	V1A.3		17CF1579	Y3
15CF0835	3C.2a		17CF0094	6B.1		19CF1415	V1A.3		17CF1567	Y3
15CF0839	3C.2a		17CF1914	6B.1		19CF1466	V1A.3		17CF1732	Y3
15CF0842	3C.2a		17HB0533	6B.1		19CF1516	V1A.3		18CF0639	Y3
15CF0844	3C.2a		17CF1316	6B.1		19CF1543	V1A.3		18VR0491	Y3
15CF0860	3C.2a		17CF1551	6B.1		19CF1560	V1A.3		18CF0762	Y3
15CF0863	3C.2a		17CF2183	6B.1		19CF1574	V1A.3		18CF1319	Y3
15CF0865	3C.2a		17CF1056	6B.1		19CF1612	V1A.3		18CF1607	Y3
15CF0866	3C.2a		17CF1185	6B.1		19CF1613	V1A.3		16CF0723	Y3
15CF0867	3C.2a		17CF0111	6B.1		19CF1669	V1A.3		14CF0410	Y3
15CF0868	3C.2a		17CF0219	6B.1		19CF1781	V1A.3		15CF1963	Y3
15CF0873	3C.2a		17CF0591	6B.1		19CF1784	V1A.3		13CF4162	Y2
15CF0875	3C.2a		17CF0168	6B.1		19CF1170	V1A.3		13CF4166	Y2
15CF0876	3C.2a		17CF0237	6B.1		19CF1343	V1A.3		13CF5158	Y2
15CF0877	3C.2a		17HB0088	6B.1		19CF1409	V1A.3		13CF5226	Y2
15CF0885	3C.2a		17HB0491	6B.1		19CF1716	V1A.3		13CF5161	Y2
15CF0887	3C.2a		18CF0834	6B.1		19CF0778	V1A.3		13HB4784	Y2
15CF0891	3C.2a		17CF0170	6B.1A		19CF0863	V1A.3		13HB5004	Y2
15CF0895	3C.2a		17CF0178	6B.1A		19CF0986	V1A.3		13CF5686	Y2
15CF0917	3C.2a		17CF0179	6B.1A		19CF0989	V1A.3		13HB4380	Y2
15CF0919	3C.2a		17CF0245	6B.1A		19CF1100	V1A.3		13HB4892	Y2
15CF0921	3C.2a		17CF0285	6B.1A		19CF1205	V1A.3		13HB4920	Y2
15CF0922	3C.2a		17CF1649	6B.1A		19CF1210	V1A.3		14CF0021	Y2
15CF0924	3C.2a		17CF1831	6B.1A		19CF1480	V1A.3		13CF5631	Y2
15CF0947	3C.2a		17CF1949	6B.1A		19CF1217	V1A.3		13HB4777	Y2
15CF0951	3C.2a		17CF2264	6B.1A		19CF1345	V1A.3		13CF5387	Y2
15CF0956	3C.2a		17CF2280	6B.1A		19CF1362	V1A.3		13CF5142	Y2
15CF0960	3C.2a		17CF2309	6B.1A		19CF1413	V1A.3		13CF5209	Y2
15CF0965	3C.2a		17CF1836	6B.1A		19CF1541	V1A.3		13CF5309	Y2
15CF0967	3C.2a		17CF1770	6B.1A		19CF1569	V1A.3		13HB4931	Y2
15CF0972	3C.2a		17CF0476	6B.1A		19CF1598	V1A.3		13CF5242	Y2
15CF0977	3C.2a		17CF0666	6B.1A		19CF1631	V1A.3		13CF5429	Y2
15CF0982	3C.2a		17CF1378	6B.1A		19CF1701	V1A.3		13CF5528	Y2
15CF0983	3C.2a		17CF1823	6B.1A		19CF1712	V1A.3		13HB4708	Y2
15CF1012	3C.2a		17HB0628	6B.1A		19CF1766	V1A.3		13CF5333	Y2
15CF1013	3C.2a		17HB0542	6B.1A		19CF1807	V1A.3		13CF5687	Y2
15CF1015	3C.2a		17HB1076	6B.1A		19CF1143	V1A.3		13CF5706	Y2
15CF1018	3C.2a		18CF1309	6B.1A		19CF1152	V1A.3		13CF5203	Y2
15CF1026	3C.2a		17CF1635	6B.1A		19CF1209	V1A.3		13CF5336	Y2
15CF1042	3C.2a		17CF2164	6B.1A		19CF1349	V1A.3		13CF5313	Y2
15CF1059	3C.2a		17CF2329	6B.1A		19CF1411	V1A.3		13CF5635	Y2
15CF1062	3C.2a		18CF0073	6B.1A		19CF1459	V1A.3		13CF5648	Y2
15CF1068	3C.2a		18CF0074	6B.1A		19CF1652	V1A.3		13CF5696	Y2
15CF1088	3C.2a		18CF0263	6B.1A		19CF0839	V1A.3		13CF5136	Y2
15CF1093	3C.2a		18HB0080	6B.1A		19CF1011	V1A.3		13CF5206	Y2
15CF1094	3C.2a		18CF0247	6B.1A.2		19CF1272	V1A.3		13CF5806	Y2
15CF1095	3C.2a		18CF0282	6B.1A.2		19CF1576	V1A.3		13CF5268	Y2
15CF1109	3C.2a		18CF0288	6B.1A.2		19CF0870	V1A.3		13CF5404	Y2
15CF1110	3C.2a		18CF0375	6B.1A.2		19CF1286	V1A.3		13CF5254	Y2
15CF1111	3C.2a		18CF0377	6B.1A.2		19CF1752	V1A.3		14CF0825	Y2
15CF1117	3C.2a		18CF0387	6B.1A.2		19CF1220	V1A.3
15CF1118	3C.2a		18CF0289	6B.1A.2		19CF0707	V1A.3
15CF1125	3C.2a		18CF0298	6B.1A.2		19CF1551	V1A.3
15CF1127	3C.2a		18CF0327	6B.1A.2		19CF0841	V1A.3
15CF1133	3C.2a		18CF0483	6B.1A.2
15CF1142	3C.2a		18CF0529	6B.1A.2
15CF1143	3C.2a		18CF0585	6B.1A.2
15CF1145	3C.2a		18CF0301	6B.1A.2
15CF1161	3C.2a		18CF1482	6B.1A.2
15CF1167	3C.2a		18CF0312	6B.1A.2
15CF1169	3C.2a		18CF0453	6B.1A.2
15CF1174	3C.2a		18CF0739	6B.1A.2
15CF1180	3C.2a		18CF0741	6B.1A.2
15CF1201	3C.2a		18CF0799	6B.1A.2
15CF1209	3C.2a		18CF0885	6B.1A.2
15CF1210	3C.2a		18CF1129	6B.1A.2
15CF1215	3C.2a		18CF1131	6B.1A.2
15CF1220	3C.2a		18SS7456	6B.1A.2
15CF1223	3C.2a		18SS7477	6B.1A.2
15CF1224	3C.2a		18CF0500	6B.1A.2
15CF1226	3C.2a		18CF0867	6B.1A.2
15CF1229	3C.2a		18SS7678	6B.1A.2
15CF1240	3C.2a		18CF0881	6B.1A.2
15CF1267	3C.2a		18CF1028	6B.1A.2
15CF1277	3C.2a		18CF1327	6B.1A.2
15CF1283	3C.2a		18CF1323	6B.1A.2
15CF1295	3C.2a		18SS8031	6B.1A.2
15CF1301	3C.2a		18CF0502	6B.1A.2
15CF1344	3C.2a		18CF1490	6B.1A.2
15CF1350	3C.2a		18CF0791	6B.1A.2
15CF1383	3C.2a		18CF0983	6B.1A.2
15CF1387	3C.2a		18CF0899	6B.1A.2
15CF1397	3C.2a		18CF1058	6B.1A.2
15CF1402	3C.2a		18CF1520	6B.1A.2
15CF1410	3C.2a		18CF1184	6B.1A.2
15CF1413	3C.2a		18CF1238	6B.1A.2
15CF1418	3C.2a		18CF0814	6B.1A.2
15CF1420	3C.2a		18CF1303	6B.1A.2
15CF1426	3C.2a		18CF0234	6B.1A
15CF1436	3C.2a		18CF0137	6B.1A
15CF1455	3C.2a		18CF0210	6B.1A
15CF1471	3C.2a		18CF0244	6B.1A
15CF1472	3C.2a		18CF0262	6B.1A
15CF1476	3C.2a		18CF0270	6B.1A
15CF1487	3C.2a		18CF0521	6B.1A
15CF1536	3C.2a		18CF0532	6B.1A
15CF1540	3C.2a		18CF0533	6B.1A
15CF1547	3C.2a		18CF0633	6B.1A
15CF1567	3C.2a		18CF0671	6B.1A
15CF1600	3C.2a		18CF0307	6B.1A
15CF1619	3C.2a		18CF0309	6B.1A
15CF1620	3C.2a		18CF0324	6B.1A
15CF1622	3C.2a		18CF0916	6B.1A
15CF1639	3C.2a		18CF0390	6B.1A
15CF1651	3C.2a		18CF0512	6B.1A
15CF1652	3C.2a		18CF1299	6B.1A
15CF1653	3C.2a		18SS7462	6B.1A
15CF1662	3C.2a		18SS7829	6B.1A
15CF1744	3C.2a		18SS8004	6B.1A
15CF1760	3C.2a		18SS8183	6B.1A
15CF1774	3C.2a		18CF0604	6B.1A
15CF1799	3C.2a		18CF1017	6B.1A
15CF1822	3C.2a		18CF0217	6B.1A
15CF1844	3C.2a		18CF0272	6B.1A
15CF1899	3C.2a		18CF0335	6B.1A
15CF1911	3C.2a		18CF0374	6B.1A
15CF1931	3C.2a		18CF0505	6B.1A
15CF1948	3C.2a		18CF0614	6B.1A
15CF1991	3C.2a		18CF0733	6B.1A
15CF2015	3C.2a		18CF0712	6B.1A
15CF2066	3C.2a		18CF1316	6B.1A
15CF2106	3C.2a		18CF0761	6B.1A
15HB0038	3C.2a		18CF0803	6B.1A
15HB0282	3C.2a		18CF0350	6B.1A
15HB0431	3C.2a		18CF0469	6B.1A
15HB0448	3C.2a		18CF0612	6B.1A
15HB0668	3C.2a		18CF0613	6B.1A
15HB0672	3C.2a		18CF0687	6B.1A
15HB0679	3C.2a		18CF0688	6B.1A
15HB0747	3C.2a		18CF0689	6B.1A
15HB0761	3C.2a		18CF0745	6B.1A
15HB0829	3C.2a		18CF0768	6B.1A
15HB0861	3C.2a		18CF0770	6B.1A
15HB0864	3C.2a		18CF0784	6B.1A
15HB0924	3C.2a		18CF0793	6B.1A
15HB0930	3C.2a		18CF0817	6B.1A
15HB0933	3C.2a		18CF0818	6B.1A
15HB0941	3C.2a		18CF0866	6B.1A
15HB0942	3C.2a		18CF0873	6B.1A
15HB0944	3C.2a		18CF0877	6B.1A
15HB0946	3C.2a		18CF0890	6B.1A
15HB0947	3C.2a		18CF0902	6B.1A
15HB0948	3C.2a		18CF0954	6B.1A
15HB0949	3C.2a		18CF0962	6B.1A
15HB0951	3C.2a		18CF1006	6B.1A
15HB0952	3C.2a		18CF1031	6B.1A
15HB0957	3C.2a		18CF1033	6B.1A
15HB0959	3C.2a		18CF1040	6B.1A
15HB0961	3C.2a		18CF1074	6B.1A
15HB0962	3C.2a		18CF1093	6B.1A
15HB0964	3C.2a		18CF1411	6B.1A
15HB0975	3C.2a		18CF1459	6B.1A
15HB0978	3C.2a		18CF1465	6B.1A
15HB0980	3C.2a		18SS7864	6B.1A
15HB0987	3C.2a		18VR0540	6B.1A
15HB0993	3C.2a		18CF0930	6B.1A
15HB1004	3C.2a		18CF0458	6B.1A
15HB1008	3C.2a		18CF0569	6B.1A
15HB1046	3C.2a		18CF0713	6B.1A
15HB1047	3C.2a		18CF0716	6B.1A
15HB1048	3C.2a		18CF0839	6B.1A
15HB1055	3C.2a		18CF0969	6B.1A
15HB1056	3C.2a		18CF1016	6B.1A
15HB1057	3C.2a		18CF1087	6B.1A
15HB1059	3C.2a		18CF1127	6B.1A
15HB1060	3C.2a		18HB0178	6B.1A
15HB1062	3C.2a		18SS7867	6B.1A
15HB1063	3C.2a		18SS8005	6B.1A
15HB1065	3C.2a		18SS7948	6B.1A
15HB1066	3C.2a		18CF0611	6B.1A
15HB1070	3C.2a		18CF0792	6B.1A
15HB1076	3C.2a		18CF0964	6B.1A
15HB1087	3C.2a		18CF1311	6B.1A
15HB1102	3C.2a		18CF1005	6B.1A
15HB1125	3C.2a		18CF1007	6B.1A
15HB1139	3C.2a		18CF1075	6B.1A
15HB1151	3C.2a		18CF1169	6B.1A
15HB1208	3C.2a		18CF1365	6B.1A
15HB1212	3C.2a		18CF1418	6B.1A
15HB1223	3C.2a		18CF1279	6B.1A
15HB1225	3C.2a		18CF1339	6B.1A
15HB1228	3C.2a		18HB0144	6B.1A
15HB1253	3C.2a		18SS8091	6B.1A
15HB1277	3C.2a		18SS8202	6B.1A
15HB1281	3C.2a		18CF0693	6B.1A
15HB1337	3C.2a		18CF0841	6B.1A
15HB1345	3C.2a		18HB0185	6B.1A
15HB1347	3C.2a		18SS7763	6B.1A
15HB1370	3C.2a		18SS7890	6B.1A
15HB1377	3C.2a		18CF1244	6B.1A
15HB1405	3C.2a		18CF0756	6B.1A
15HB1466	3C.2a		18CF0961	6B.1A
15HB1469	3C.2a		18CF1125	6B.1A
15HB1470	3C.2a		18CF1128	6B.1A
15HB1527	3C.2a		18CF1381	6B.1A
15HB1649	3C.2a		18CF1401	6B.1A
15HB1672	3C.2a		18CF1226	6B.1A
15HB1703	3C.2a		19CF0049	6B.1A.5a
15HB1806	3C.2a		19CF0126	6B.1A.5a
15HB1855	3C.2a		19CF0174	6B.1A.5a
15HB1897	3C.2a		19CF0572	6B.1A.5a
15HB1931	3C.2a		19CF1004	6B.1A.5a
15HB2197	3C.2a		19CF0640	6B.1A.5a
15HB2391	3C.2a		19CF0748	6B.1A.5a
15HB2517	3C.2a		19CF0531	6B.1A.5a
15HB2637	3C.2a		19CF0605	6B.1A.5a
16CF0079	3C.2a1		19CF1857	6B.1A.5a
16CF0134	3C.2a1		19CF2059	6B.1A.5a
16CF0161	3C.2a		19CF2111	6B.1A.5a
16CF0206	3C.3a		19CF2010	6B.1A.5a
16CF0216	3C.3a		19CF1593	6B.1A.5a
16CF0254	3C.3a		19CF1056	6B.1A.5a
16CF0275	3C.3a		19CF1312	6B.1A.5a
16CF0282	3C.3a		19CF0223	6B.1A.5a
16CF0305	3C.2a1		19CF0134	6B.1A.5a
16CF0315	3C.2a		19CF1043	6B.1A.5a
16CF0318	3C.3a		19CF1479	6B.1A.5a
16CF0320	3C.2a1		19CF1828	6B.1A.5a
16CF0370	3C.3a		19CF2087	6B.1A.5a
16CF0377	3C.3a		19CF1762	6B.1A.5a
16CF0378	3C.3a		19CF0757	6B.1A.5a
16CF0380	3C.3a		18CF0561	6B.1A.5b
16CF0393	3C.2a1		18CF0691	6B.1A.5b
16CF0401	3C.2a		18CF0719	6B.1A.5b
16CF0402	3C.3a		18CF0729	6B.1A.5b
16CF0408	3C.2a1		18CF0734	6B.1A.5b
16CF0412	3C.3a		18CF0889	6B.1A.5b
16CF0428	3C.3a		18CF0995	6B.1A.5b
16CF0429	3C.3a		18CF1092	6B.1A.5b
16CF0437	3C.3a		18CF1139	6B.1A.5b
16CF0454	3C.3a		18CF0627	6B.1A.5b
16CF0457	3C.3a		18CF0644	6B.1A.5b
16CF0468	3C.3a		18CF0846	6B.1A.5b
16CF0470	3C.3a		18CF0976	6B.1A.5b
16CF0472	3C.2a		18CF1026	6B.1A.5b
16CF0473	3C.2a		18CF1251	6B.1A.5b
16CF0481	3C.3a		18CF1330	6B.1A.5b
16CF0494	3C.2a		18CF1353	6B.1A.5b
16CF0495	3C.3a		18CF1124	6B.1A.5b
16CF0501	3C.3a		18CF1192	6B.1A.5b
16CF0502	3C.3a		18CF0984	6B.1A.5b
16CF0503	3C.3a		18CF1329	6B.1A.5b
16CF0504	3C.3a		18CF1248	6B.1A.5b
16CF0505	3C.3a		18CF1079	6B.1A.5b
16CF0507	3C.3a		18SS7739	6B.1A.1
16CF0525	3C.3a		18CF0122	6B.1A.1
16CF0526	3C.2a		18CF0236	6B.1A.1
16CF0528	3C.3a		18CF0276	6B.1A.1
16CF0529	3C.3a		18CF0278	6B.1A.1
16CF0530	3C.2a1		18CF0494	6B.1A.1
16CF0544	3C.3a		18CF0536	6B.1A.1
16CF0562	3C.3a		18CF0565	6B.1A.1
16CF0563	3C.3a		18CF0717	6B.1A.1
16CF0564	3C.3a		18CF0788	6B.1A.1
16CF0567	3C.3a		18CF0922	6B.1A.1
16CF0574	3C.3a		18CF1113	6B.1A.1
16CF0575	3C.2a		18HB0081	6B.1A.1
16CF0577	3C.3a		18HB0139	6B.1A.1
16CF0578	3C.3a		18HB0159	6B.1A.1
16CF0579	3C.3a		18SS7913	6B.1A.1
16CF0581	3C.3a		18CF0371	6B.1A.1
16CF0585	3C.2a1		18CF0864	6B.1A.1
16CF0588	3C.3a		18CF1080	6B.1A.1
16CF0590	3C.3a		18CF1108	6B.1A.1
16CF0593	3C.2a1		18CF1321	6B.1A.1
16CF0598	3C.3a		18CF1499	6B.1A.1
16CF0599	3C.3a		18CF1505	6B.1A.1
16CF0602	3C.3a		18CF1052	6B.1A.1
16CF0611	3C.3a		18CF1249	6B.1A.1
16CF0626	3C.2a		18CF1334	6B.1A.1
16CF0629	3C.2a		18HB0150	6B.1A.1
16CF0630	3C.3a		18SS7650	6B.1A.1
16CF0632	3C.2a		18CF0694	6B.1A.1
16CF0633	3C.2a		18CF0695	6B.1A.1
16CF0634	3C.3a		18CF1062	6B.1A.1
16CF0635	3C.3a		18CF1063	6B.1A.1
16CF0637	3C.2a1		18CF1289	6B.1A.1
16CF0641	3C.2a1		18HB0198	6B.1A.1
16CF0654	3C.2a1		18CF0982	6B.1A.1
16CF0676	3C.2a1		18CF1370	6B.1A.1
16CF0678	3C.3a		18CF0795	6B.1A.1
16CF0681	3C.2a		18CF0796	6B.1A.1
16CF0683	3C.3a		18CF1081	6B.1A.1
16CF0687	3C.2a		18CF1023	6B.1A.1
16CF0696	3C.3a		18CF0342	6B.1A.1
16CF0697	3C.3a		18CF0480	6B.1A.1
16CF0705	3C.2a1		18CF0586	6B.1A.1
16CF0707	3C.2a		18CF0600	6B.1A.1
16CF0710	3C.3a		18CF0666	6B.1A.1
16CF0712	3C.2a		18CF0809	6B.1A.1
16CF0717	3C.2a		18CF0938	6B.1A.1
16CF0725	3C.3a		18CF1001	6B.1A.1
16CF0729	3C.2a		18SS7670	6B.1A.1
16CF0732	3C.3a		18SS7790	6B.1A.1
16CF0733	3C.3a		18SS7841	6B.1A.1
16CF0734	3C.2a		18SS7917	6B.1A.1
16CF0738	3C.3a		18CF1099	6B.1A.1
16CF0739	3C.2a		18CF0832	6B.1A.1
16CF0740	3C.3a		18CF0926	6B.1A.1
16CF0741	3C.3a		18CF0764	6B.1A.1
16CF0748	3C.3a		18CF1013	6B.1A.1
16CF0760	3C.3a		18CF1287	6B.1A.1
16CF0761	3C.3a		18SS7904	6B.1A.1
16CF0762	3C.3a		18SS8008	6B.1A.1
16CF0763	3C.2a1		18CF1116	6B.1A.1
16CF0777	3C.3a		18SS8088	6B.1A.1
16CF0779	3C.3a		18CF0388	6B.1A.1
16CF0783	3C.3a		18CF0507	6B.1A
16CF0786	3C.2a1		19CF0676	6B.1A.2
16CF0788	3C.3a		19CF0678	6B.1A.2
16CF0800	3C.3a		19CF0119	6B.1A.5b
16CF0819	3C.3a		19CF0127	6B.1A.5b
16CF0823	3C.3a		19CF0370	6B.1A.5b
16CF0832	3C.3a		19CF0379	6B.1A.5b
16CF0844	3C.3a		19CF0380	6B.1A.5b
16CF0846	3C.2a		19CF0658	6B.1A.5b
16CF0858	3C.3a		19CF0703	6B.1A.5b
16CF0859	3C.2a		19CF0821	6B.1A.5b
16CF0875	3C.3a		19CF0828	6B.1A.5b
16CF0876	3C.3a		19CF0830	6B.1A.5b
16CF0889	3C.3a		19CF0851	6B.1A.5b
16CF0891	3C.2a		19CF0927	6B.1A.5b
16CF0895	3C.2a		19CF0977	6B.1A.5b
16HB0239	3C.2a		19CF1050	6B.1A.5b
16HB0251	3C.2a		19CF1110	6B.1A.5b
16HB0254	3C.3a		19CF1184	6B.1A.5b
16HB0299	3C.2a		19CF1238	6B.1A.5b
16HB0306	3C.3a		19CF1309	6B.1A.5b
16HB0319	3C.2a		19CF1424	6B.1A.5b
16HB0323	3C.2a		19CF1583	6B.1A.5b
16HB1816	3C.3a		19CF1601	6B.1A.5b
16HB1819	3C.2a		19CF0335	6B.1A.5b
16HB1881	3C.3a		19CF1436	6B.1A.5b
16HB1885	3C.3a		19CF0666	6B.1A.5b
16HB1897	3C.2a		19CF1329	6B.1A.5b
16HB1992	3C.3a		19CF1511	6B.1A.5b
16HB2177	3C.3a		19CF0779	6B.1A.5b
16HB2229	3C.3a		19CF1058	6B.1A.5b
16HB2379	3C.3a		19CF1237	6B.1A.5b
16HB2395	3C.3a		19CF1401	6B.1A.5b
17CF0001	3C.2a1		19CF1353	6B.1A.5b
17CF0043	3C.2a1		19CF1759	6B.1A.5b
17CF0047	3C.2a1b		19CF0790	6B.1A.5b
17CF0070	3C.2a1b		19CF2100	6B.1A.5b
17CF0078	3C.2a1		19HB0824	6B.1A.5b
17CF0091	3C.2a1b		19CF0182	6B.1A.5b
17CF0092	3C.2a1		19CF0272	6B.1A.5b
17CF0126	3C.2a1b.1		18CF0055	6B.1
17CF0127	3C.2a		17CF0853	6B.1
17CF0140	3C.2a3		17CF0971	6B.1
17CF0149	3C.2a1		22CF0356	6B.1A.5a.2a
17CF0155	3C.2a1b		22CF0357	6B.1A.5a.2a
17CF0165	3C.2a1b		22VR1378	6B.1A.5a.2a
17CF0166	3C.2a		22VR1610	6B.1A.5a.2a
17CF0182	3C.2a		22VR1734	6B.1A.5a.2a
17CF0188	3C.2a		22VR1870	6B.1A.5a.2a
17CF0190	3C.2a		22VR1941	6B.1A.5a.2a
17CF0192	3C.2a		22VR1959	6B.1A.5a.2a
17CF0201	3C.2a1b		22VR2115	6B.1A.5a.2a
17CF0204	3C.2a1b		22VR2117	6B.1A.5a.2a
17CF0214	3C.2a1b		22VR2166	6B.1A.5a.2a
17CF0220	3C.2a		22VR2173	6B.1A.5a.2a
17CF0225	3C.2a3		22VR2565	6B.1A.5a.2a
17CF0226	3C.2a1b		22VR2569	6B.1A.5a.2a
17CF0227	3C.2a1b		22VR2581	6B.1A.5a.2a
17CF0246	3C.2a		22VR2960	6B.1A.5a.2a
17CF0262	3C.2a		22VR3358	6B.1A.5a.2a
17CF0266	3C.2a		22VR3724	6B.1A.5a.2a
17CF0267	3C.2a3		22HH5086	6B.1A.5a.2a
17CF0270	3C.2a1b		22HH5088	6B.1A.5a.2a
17CF0275	3C.2a1b		22VR1342	6B.1A.5a.2a
17CF0280	3C.2a1b		22VR1380	6B.1A.5a.2a
17CF0284	3C.2a3		22VR1300	6B.1A.5a.2a
17CF0287	3C.2a		22VR1330	6B.1A.5a.2a
17CF0311	3C.2a		22VR3898	6B.1A.5a.2a
17CF0312	3C.2a1b		22VR3928	6B.1A.5a.2a
17CF0313	3C.2a		22VR3929	6B.1A.5a.2a
17CF0326	3C.2a		22VR4361	6B.1A.5a.2a
17CF0339	3C.2a3		22VR2723	6B.1A.5a.2a
17CF0343	3C.2a		22VR2890	6B.1A.5a.2a
17CF0347	3C.2a1b
17CF0350	3C.2a1b
17CF0352	3C.2a1b
17CF0359	3C.2a
17CF0367	3C.2a1b
17CF0368	3C.2a
17CF0369	3C.2a
17CF0371	3C.2a
17CF0380	3C.2a1b
17CF0382	3C.2a3
17CF0383	3C.2a1b
17CF0387	3C.2a
17CF0393	3C.2a
17CF0400	3C.2a
17CF0405	3C.2a
17CF0426	3C.2a
17CF0428	3C.2a
17CF0439	3C.2a
17CF0440	3C.2a
17CF0441	3C.2a
17CF0447	3C.2a1b
17CF0448	3C.2a
17CF0450	3C.2a
17CF0451	3C.2a
17CF0452	3C.2a1b
17CF0461	3C.2a1
17CF0463	3C.2a
17CF0467	3C.2a
17CF0485	3C.2a
17CF0486	3C.2a3
17CF0488	3C.2a1b
17CF0491	3C.2a
17CF0492	3C.2a1b
17CF0501	3C.2a1b
17CF0502	3C.2a1b
17CF0503	3C.2a1b
17CF0507	3C.2a
17CF0514	3C.2a
17CF0518	3C.2a
17CF0521	3C.2a1b
17CF0527	3C.2a
17CF0528	3C.2a1b
17CF0533	3C.2a1b
17CF0534	3C.2a
17CF0535	3C.2a
17CF0542	3C.2a2
17CF0546	3C.2a
17CF0548	3C.2a
17CF0553	3C.2a1b
17CF0554	3C.2a
17CF0562	3C.2a
17CF0565	3C.2a1b
17CF0567	3C.2a
17CF0576	3C.2a1b
17CF0578	3C.2a3
17CF0579	3C.2a3
17CF0581	3C.2a3
17CF0585	3C.2a1b.1
17CF0589	3C.2a
17CF0601	3C.2a
17CF0609	3C.2a1b
17CF0611	3C.2a
17CF0617	3C.2a1b
17CF0622	3C.2a
17CF0623	3C.2a
17CF0628	3C.2a1b
17CF0632	3C.2a1
17CF0637	3C.2a1b.1
17CF0638	3C.2a1b
17CF0645	3C.2a
17CF0647	3C.2a
17CF0657	3C.2a1b
17CF0664	3C.2a1b
17CF0668	3C.2a
17CF0671	3C.2a3
17CF0672	3C.2a
17CF0674	3C.2a1b
17CF0675	3C.2a
17CF0677	3C.2a1b
17CF0685	3C.2a1b
17CF0695	3C.2a1b
17CF0700	3C.2a
17CF0703	3C.2a
17CF0705	3C.2a
17CF0707	3C.2a
17CF0718	3C.2a1b.1
17CF0719	3C.2a1b
17CF0722	3C.2a
17CF0724	3C.2a
17CF0730	3C.2a1b
17CF0744	3C.2a
17CF0755	3C.2a1b
17CF0758	3C.2a
17CF0760	3C.2a1b
17CF0762	3C.2a
17CF0764	3C.2a
17CF0770	3C.2a1b
17CF0774	3C.2a
17CF0777	3C.2a2
17CF0779	3C.2a
17CF0783	3C.2a2
17CF0794	3C.2a1b
17CF0797	3C.2a
17CF0801	3C.2a
17CF0803	3C.2a
17CF0806	3C.2a
17CF0807	3C.2a1b
17CF0812	3C.2a
17CF0816	3C.2a
17CF0818	3C.2a
17CF0827	3C.2a
17CF0848	3C.2a
17CF0861	3C.2a
17CF0863	3C.2a
17CF0872	3C.2a
17CF0882	3C.2a1b
17CF0894	3C.2a
17CF0900	3C.2a
17CF0909	3C.2a1b
17CF0917	3C.2a1b
17CF0918	3C.2a
17CF0921	3C.2a
17CF0922	3C.2a
17CF0925	3C.2a1b.1
17CF0941	3C.2a1b
17CF0949	3C.2a
17CF0951	3C.2a1b
17CF0952	3C.2a
17CF0967	3C.2a
17CF0968	3C.2a
17CF0974	3C.2a1b
17CF0975	3C.2a
17CF0976	3C.2a1b
17CF0979	3C.2a1b.1
17CF0983	3C.2a
17CF0986	3C.2a
17CF1010	3C.2a
17CF1021	3C.2a1b
17CF1023	3C.2a
17CF1024	3C.2a1b.1
17CF1031	3C.2a
17CF1032	3C.2a
17CF1033	3C.2a
17CF1034	3C.2a
17CF1036	3C.2a1b.1
17CF1039	3C.2a1
17CF1049	3C.2a
17CF1052	3C.2a1b
17CF1057	3C.2a
17CF1060	3C.2a1b
17CF1061	3C.2a1b
17CF1066	3C.2a
17CF1070	3C.2a1b
17CF1075	3C.2a1b
17CF1083	3C.2a1b
17CF1096	3C.2a1b
17CF1101	3C.2a1b.1
17CF1102	3C.2a
17CF1103	3C.2a
17CF1113	3C.2a
17CF1129	3C.2a1b
17CF1132	3C.2a1b
17CF1133	3C.2a
17CF1134	3C.2a
17CF1136	3C.2a
17CF1143	3C.2a1b
17CF1144	3C.2a
17CF1165	3C.2a
17CF1172	3C.2a3
17CF1181	3C.2a1b
17CF1182	3C.2a
17CF1183	3C.2a
17CF1188	3C.2a
17CF1201	3C.2a1
17CF1202	3C.2a
17CF1214	3C.2a
17CF1217	3C.2a
17CF1233	3C.2a
17CF1239	3C.2a
17CF1253	3C.2a1b
17CF1258	3C.2a
17CF1274	3C.2a1b
17CF1284	3C.2a1b
17CF1300	3C.2a1b
17CF1302	3C.2a
17CF1305	3C.2a1b
17CF1307	3C.2a1b.1
17CF1318	3C.2a
17CF1336	3C.2a
17CF1349	3C.2a
17CF1375	3C.2a
17CF1384	3C.2a3
17CF1395	3C.2a
17CF1406	3C.2a1b
17CF1408	3C.2a1b
17CF1418	3C.2a2
17CF1424	3C.2a
17CF1452	3C.2a
17CF1454	3C.2a
17CF1456	3C.2a1b
17CF1461	3C.2a1b
17CF1469	3C.2a
17CF1485	3C.2a1b.1
17CF1491	3C.2a
17CF1496	3C.2a
17CF1501	3C.2a
17CF1504	3C.2a1b
17CF1505	3C.2a
17CF1507	3C.2a
17CF1510	3C.2a
17CF1524	3C.2a
17CF1526	3C.2a2
17CF1541	3C.2a2
17CF1542	3C.2a
17CF1548	3C.2a1b
17CF1550	3C.2a1b.1
17CF1557	3C.2a3
17CF1580	3C.2a
17CF1585	3C.2a1b
17CF1591	3C.2a
17CF1598	3C.2a
17CF1647	3C.2a1b
17CF1661	3C.2a3
17CF1681	3C.2a1b
17CF1714	3C.2a1b.1
17CF1716	3C.2a1b.1
17CF1758	3C.2a
17CF1774	3C.2a1b.1
17CF1801	3C.2a
17CF1806	3C.2a
17CF1832	3C.2a1b.1
17CF1848	3C.2a2
17CF1849	3C.2a2
17CF1868	3C.2a
17CF1943	3C.2a
17CF1955	3C.2a3
17CF1958	3C.2a
17CF1972	3C.2a1b
17CF1977	3C.2a
17CF1984	3C.2a1b
17CF1985	3C.2a3
17CF1994	3C.2a1b
17CF1996	3C.2a
17CF2012	3C.2a
17CF2036	3C.2a1b
17CF2055	3C.2a2
17CF2066	3C.2a2
17CF2073	3C.2a1b
17CF2079	3C.2a1b.1
17CF2091	3C.2a1b.1
17CF2100	3C.2a1
17CF2137	3C.2a1b.1
17CF2182	3C.2a1b.1
17CF2186	3C.2a2
17CF2211	3C.2a2
17CF2214	3C.2a2
17CF2219	3C.2a
17CF2221	3C.2a1
17CF2235	3C.2a3
17CF2269	3C.2a2
17CF2308	3C.2a3
17CF2345	3C.2a2
17CF2348	3C.2a1
17HB0113	3C.2a1
17HB0173	3C.2a1b
17HB0183	3C.2a
17HB0187	3C.2a
17HB0224	3C.2a
17HB0252	3C.2a1
17HB0257	3C.2a1
17HB0258	3C.2a1b.1
17HB0291	3C.2a3
17HB0296	3C.2a1b
17HB0299	3C.2a3
17HB0302	3C.2a3
17HB0303	3C.2a
17HB0347	3C.2a
17HB0348	3C.2a
17HB0355	3C.2a
17HB0395	3C.2a
17HB0435	3C.2a
17HB0441	3C.2a
17HB0486	3C.2a
17HB0528	3C.2a
17HB0529	3C.2a3
17HB0532	3C.2a
17HB0534	3C.2a
17HB0669	3C.2a
17HB0740	3C.2a
17HB0826	3C.2a1b.1
17HB0873	3C.2a
17HB0979	3C.2a
18CF0004	3C.2a1b.1
18CF0011	3C.2a1b.1
18CF0273	3C.2a2
18CF0524	3C.2a2
18CF0577	3C.2a2
18CF0626	3C.2a2
18CF0670	3C.2a2
18CF0673	3C.2a2
18CF0847	3C.2a2
18CF0888	3C.2a2
18CF0917	3C.2a2
18CF0925	3C.2a2
18CF0927	3C.2a2
18CF0979	3C.2a1b.1
18CF1035	3C.2a1
18CF1053	3C.2a2
18CF1065	3C.2a2
18CF1104	3C.2a2
18CF1134	3C.2a2
18CF1142	3C.2a2
18CF1168	3C.2a2
18CF1176	3C.2a2
18CF1193	3C.2a2
18CF1198	3C.2a2
18CF1215	3C.2a2
18CF1235	3C.2a2
18CF1264	3C.2a2
18CF1282	3C.2a2
18CF1308	3C.2a2
18CF1325	3C.2a2
18CF1338	3C.2a2
18CF1357	3C.2a2
18CF1391	3C.2a1b.1
18CF1404	3C.2a2
18CF1416	3C.2a2
18CF1427	3C.2a2
18CF1436	3C.2a2
18CF1447	3C.2a2
18CF1448	3C.2a2
18CF1474	3C.2a2
18CF1523	3C.2a1b.2
18CF1584	3C.2a2
18CF1598	3C.2a2
18CF1624	3C.2a1b.2
18SS7964	3C.2a1b.1
18SS8138	3C.2a2
18VR0444	3C.2a2
18VR0448	3C.2a2
18VR0455	3C.2a2
18VR0507	3C.2a2
18VR0508	3C.2a2
18VR0510	3C.2a2
18VR0512	3C.2a2
18VR0513	3C.2a1
19CF0017	3C.2a1b.2b
19CF0023	3C.2a1b.2b
19CF0024	3C.2a1b.2b
19CF0039	3C.2a1b.2b
19CF0068	3C.2a1b.2b
19CF0073	3C.2a1b.2b
19CF0074	3C.2a1b.2b
19CF0077	3C.2a1b.2b
19CF0080	3C.2a1b.2b
19CF0081	3C.2a1b.2b
19CF0090	3C.2a1b.2b
19CF0096	3C.2a1b.2b
19CF0117	3C.2a1b.2b
19CF0142	3C.2a1b.2b
19CF0148	3C.2a1b.2b
19CF0149	3C.2a1b.2b
19CF0168	3C.2a1b.2
19CF0169	3C.2a1b.2b
19CF0184	3C.2a1b.2
19CF0186	3C.2a1b.2b
19CF0188	3C.2a1b.2b
19CF0207	3C.2a1b.2b
19CF0209	3C.2a1b.2
19CF0215	3C.2a1b.2b
19CF0226	3C.2a1b.2b
19CF0240	3C.2a1b.2b
19CF0242	3C.2a1b.2b
19CF0248	3C.2a1b.2
19CF0252	3C.2a1b.2b
19CF0253	3C.2a1b.2b
19CF0264	3C.2a1b.2b
19CF0266	3C.2a1b.2b
19CF0269	3C.2a1b.2b
19CF0271	3C.2a1b.2b
19CF0279	3C.2a1b.2
19CF0281	3C.2a1b.2b
19CF0291	3C.2a1b.2
19CF0317	3C.2a1b.2
19CF0322	3C.2a1b.2b
19CF0328	3C.2a1b.2b
19CF0332	3C.2a1b.2b
19CF0334	3C.2a1b.2b
19CF0337	3C.2a1b.2b
19CF0339	3C.2a1b.2
19CF0361	3C.2a1b.2b
19CF0363	3C.2a1b.2
19CF0367	3C.2a1b.2b
19CF0384	3C.2a1b.2b
19CF0389	3C.2a1b.2b
19CF0400	3C.2a1b.2b
19CF0403	3C.2a1b.2b
19CF0408	3C.2a1b.2b
19CF0410	3C.2a1b.2b
19CF0411	3C.2a1b.2b
19CF0415	3C.2a1b.2b
19CF0425	3C.2a1b.2b
19CF0426	3C.2a1b.2b
19CF0435	3C.2a1b.2b
19CF0436	3C.2a1b.2b
19CF0451	3C.2a1b.2
19CF0459	3C.2a1b.2b
19CF0460	3C.2a1b.2b
19CF0467	3C.2a1b.2b
19CF0469	3C.2a1b.2b
19CF0475	3C.2a1b.2b
19CF0489	3C.2a1b.2
19CF0490	3C.2a1b.2b
19CF0492	3C.2a1b.2b
19CF0493	3C.2a1b.2b
19CF0505	3C.2a1b.2b
19CF0536	3C.2a1b.2b
19CF0541	3C.2a1b.2b
19CF0542	3C.2a1b.2b
19CF0554	3C.2a1b.2b
19CF0562	3C.2a1b.2b
19CF0565	3C.2a1b.2b
19CF0582	3C.2a1b.2b
19CF0599	3C.2a1b.2b
19CF0600	3C.2a1b.2b
19CF0632	3C.2a1b.2
19CF0647	3C.2a1b.2
19CF0663	3C.2a1b.2b
19CF0683	3C.2a1b.2
19CF0690	3C.2a1b.2b
19CF0692	3C.2a1b.2b
19CF0699	3C.2a1b.2
19CF0706	3C.2a1b.2b
19CF0719	3C.2a1b.2b
19CF0722	3C.2a1b.2b
19CF0725	3C.2a1b.2b
19CF0727	3C.2a1b.2b
19CF0731	3C.2a1b.2b
19CF0733	3C.2a1b.2b
19CF0743	3C.2a1b.2b
19CF0751	3C.2a1b.2b
19CF0758	3C.2a1b.2b
19CF0764	3C.2a1b.2
19CF0781	3C.2a1b.2b
19CF0783	3C.2a1b.2b
19CF0788	3C.2a1b.2b
19CF0800	3C.2a1b.2b
19CF0802	3C.2a1b.2
19CF0825	3C.2a1b.2b
19CF0836	3C.2a1b.2b
19CF0837	3C.2a1b.2b
19CF0859	3C.2a1b.2b
19CF0860	3C.2a1b.2b
19CF0879	3C.2a1b.2b
19CF0884	3C.2a1b.2
19CF0887	3C.2a1b.2b
19CF0897	3C.2a1b.2b
19CF0909	3C.2a1b.2b
19CF0913	3C.2a1b.2b
19CF0914	3C.2a1b.2b
19CF0923	3C.2a1b.2
19CF0936	3C.2a1b.2
19CF0940	3C.2a1b.1
19CF0943	3C.2a1b.2
19CF0956	3C.2a1b.2b
19CF0957	3C.2a1b.2b
19CF0958	3C.2a1b.2b
19CF0965	3C.2a1b.2b
19CF0974	3C.2a1b.2b
19CF0975	3C.2a1b.2b
19CF0997	3C.2a1b.2b
19CF1001	3C.2a1b.2
19CF1006	3C.2a1b.2b
19CF1028	3C.2a1b.2
19CF1037	3C.2a1b.2b
19CF1040	3C.2a1b.2b
19CF1046	3C.2a1b.2b
19CF1062	3C.2a1b.2
19CF1094	3C.2a1b.2b
19CF1097	3C.2a1b.2b
19CF1112	3C.2a1b.2b
19CF1120	3C.2a1b.2
19CF1122	3C.2a1b.2b
19CF1127	3C.2a1b.2b
19CF1135	3C.2a1b.2b
19CF1141	3C.2a1b.2b
19CF1149	3C.2a1b.2
19CF1150	3C.2a1b.2b
19CF1155	3C.2a1b.2b
19CF1162	3C.2a1b.2b
19CF1166	3C.2a1b.2b
19CF1173	3C.2a1b.2b
19CF1176	3C.2a1b.2b
19CF1241	3C.2a1b.2b
19CF1242	3C.2a1b.2b
19CF1244	3C.2a1b.2
19CF1251	3C.2a1b.2b
19CF1253	3C.2a1b.2b
19CF1261	3C.2a1b.2b
19CF1263	3C.2a1b.2b
19CF1264	3C.2a1b.2b
19CF1265	3C.2a1b.2b
19CF1277	3C.2a1b.2b
19CF1291	3C.2a1b.2b
19CF1294	3C.2a1b.2b
19CF1304	3C.2a1b.2b
19CF1315	3C.2a1b.2b
19CF1326	3C.2a1b.2b
19CF1333	3C.2a1b.2b
19CF1335	3C.3a1
19CF1336	3C.2a1b.2
19CF1337	3C.2a1b.2b
19CF1372	3C.2a1b.2b
19CF1389	3C.2a1b.2b
19CF1392	3C.2a1b.2b
19CF1400	3C.2a1b.2b
19CF1404	3C.2a1b.2b
19CF1407	3C.2a1b.2b
19CF1418	3C.2a1b.2b
19CF1421	3C.2a1b.2b
19CF1430	3C.2a1b.2b
19CF1431	3C.2a1b.2
19CF1437	3C.2a1b.2b
19CF1443	3C.3a1
19CF1451	3C.2a1b.2b
19CF1458	3C.3a1
19CF1461	3C.2a1b.2b
19CF1462	3C.2a1b.2
19CF1469	3C.2a1b.2
19CF1484	3C.2a1b.2
19CF1485	3C.2a1b.2b
19CF1498	3C.2a1b.2b
19CF1515	3C.2a1b.2b
19CF1517	3C.2a1b.2b
19CF1531	3C.2a1b.2b
19CF1532	3C.2a1b.2b
19CF1533	3C.2a1b.2b
19CF1540	3C.2a1b.2b
19CF1561	3C.2a1b.2b
19CF1562	3C.2a1b.2b
19CF1582	3C.2a1b.2b
19CF1585	3C.2a1b.2b
19CF1588	3C.2a1b.2b
19CF1599	3C.2a1b.2b
19CF1606	3C.2a1b.2b
19CF1610	3C.2a1b.2b
19CF1628	3C.2a1b.2b
19CF1636	3C.2a1b.2b
19CF1640	3C.2a1b.2b
19CF1641	3C.2a1b.2b
19CF1657	3C.2a1b.2b
19CF1660	3C.2a1b.2b
19CF1664	3C.2a1b.2b
19CF1673	3C.2a1b.2b
19CF1683	3C.2a1b.2b
19CF1684	3C.2a1b.2b
19CF1690	3C.3a1
19CF1706	3C.2a1b.2b
19CF1719	3C.2a1b.2b
19CF1735	3C.2a1b.2
19CF1738	3C.2a1b.2b
19CF1756	3C.2a1b.2b
19CF1765	3C.2a1b.2
19CF1769	3C.2a1b.2b
19CF1779	3C.2a1b.2b
19CF1793	3C.2a1b.2b
19CF1794	3C.2a1b.2b
19CF1801	3C.2a1b.2b
19CF1803	3C.2a1b.2b
19CF1806	3C.2a1b.2b
19CF1808	3C.2a1b.2b
19CF1811	3C.2a1b.2b
19CF1813	3C.2a1b.2b
19CF1814	3C.2a1b.2
19CF1815	3C.2a1b.2b
19CF1820	3C.2a1b.2b
19CF1826	3C.2a1b.2b
19CF1831	3C.2a1b.2b
19CF1832	3C.2a1b.2b
19CF1834	3C.2a1b.2b
19CF1841	3C.2a1b.2b
19CF1845	3C.2a1b.2b
19CF1849	3C.2a1b.2b
19CF1853	3C.2a1b.2b
19CF1871	3C.2a1b.2b
19CF1873	3C.2a1b.2b
19CF1880	3C.2a1b.2b
19CF1900	3C.2a1b.2b
19CF1919	3C.2a1b.2b
19CF1937	3C.2a1b.2
19CF1978	3C.2a1b.2b
19CF1982	3C.2a1b.2
19CF1996	3C.3a1
19CF2045	3C.2a1b.2b
19CF2046	3C.2a1b.2b
19CF2069	3C.2a1b.2b
19CF2108	3C.3a1
19CF2118	3C.2a1b.2b
19CF2134	3C.3a1
19CF2136	3C.3a1
19CF2145	3C.3a1
19CF2148	3C.2a1b.2b
19CF2154	3C.3a1
19SS2310	3C.2a1b.2b
19SS2550	3C.2a1b.2b
19SS2626	3C.2a1b.2b
19SS2795	3C.2a1b.2b
19SS2986	3C.2a1b.2b
22CF0085	3C.2a1b.2a.2a.1
22CF0086	3C.2a1b.2a.2a.1
22CF0087	3C.2a1b.2a.2a.1
22CF0089	3C.2a1b.2a.2a.1
22CF0090	3C.2a1b.2a.2a.1
22CF0092	3C.2a1b.2a.2a.1
22CF0093	3C.2a1b.2a.2a.1
22CF0096	3C.2a1b.2a.2a.1
22CF0097	3C.2a1b.2a.2a.1
22CF0098	3C.2a1b.2a.2a.1
22CF0104	3C.2a1b.2a.2a.1
22CF0107	3C.2a1b.2a.2a.1
22CF0108	3C.2a1b.2a.2a.1
22CF0111	3C.2a1b.2a.2a.1
22CF0112	3C.2a1b.2a.2a.1
22CF0114	3C.2a1b.2a.2a.1
22CF0115	3C.2a1b.2a.2a.1
22CF0117	3C.2a1b.2a.2a.1
22CF0120	3C.2a1b.2a.2a.1
22CF0124	3C.2a1b.2a.2a.1
22CF0132	3C.2a1b.2a.2a.1
22CF0135	3C.2a1b.2a.2a.1
22CF0136	3C.2a1b.2a.2a.1
22CF0139	3C.2a1b.2a.2a.1
22CF0140	3C.2a1b.2a.2a.1
22CF0141	3C.2a1b.2a.2a.1
22CF0143	3C.2a1b.2a.2a.1
22CF0147	3C.2a1b.2a.2a.1
22CF0152	3C.2a1b.2a.2a.1
22CF0158	3C.2a1b.2a.2a.1
22CF0160	3C.2a1b.2a.2a.1
22CF0161	3C.2a1b.2a.2a.1
22CF0162	3C.2a1b.2a.2a.1
22CF0163	3C.2a1b.2a.2a.1
22CF0166	3C.2a1b.2a.2a.1
22CF0171	3C.2a1b.2a.2a.1
22CF0177	3C.2a1b.2a.2a.1
22CF0178	3C.2a1b.2a.2a.1
22CF0180	3C.2a1b.2a.2a.1
22CF0181	3C.2a1b.2a.2a.1
22CF0184	3C.2a1b.2a.2a.1
22CF0197	3C.2a1b.2a.2a.1
22CF0199	3C.2a1b.2a.2a.1
22CF0200	3C.2a1b.2a.2a.1
22CF0202	3C.2a1b.2a.2a.1
22CF0205	3C.2a1b.2a.2a.1
22CF0206	3C.2a1b.2a.2a.1
22CF0208	3C.2a1b.2a.2a.1
22CF0210	3C.2a1b.2a.2a.1
22CF0214	3C.2a1b.2a.2a.1
22CF0215	3C.2a1b.2a.2a.1
22CF0218	3C.2a1b.2a.2a.1
22CF0220	3C.2a1b.2a.2a.1
22CF0222	3C.2a1b.2a.2a.1
22CF0225	3C.2a1b.2a.2a.1
22CF0226	3C.2a1b.2a.2a.1
22CF0227	3C.2a1b.2a.2a.1
22CF0228	3C.2a1b.2a.2a.1
22CF0232	3C.2a1b.2a.2a.1
22CF0236	3C.2a1b.2a.2a.1
22CF0239	3C.2a1b.2a.2a.1
22CF0240	3C.2a1b.2a.2a.1
22CF0242	3C.2a1b.2a.2a.1
22CF0243	3C.2a1b.2a.2a.1
22CF0246	3C.2a1b.2a.2a.1
22CF0250	3C.2a1b.2a.2a.1
22CF0256	3C.2a1b.2a.2a.1
22CF0261	3C.2a1b.2a.2a.1
22CF0285	3C.2a1b.2a.2a.1
22CF0288	3C.2a1b.2a.2a.1
22CF0289	3C.2a1b.2a.2a.1
22CF0294	3C.2a1b.2a.2a.1
22CF0295	3C.2a1b.2a.2a.1
22CF0296	3C.2a1b.2a.2a.1
22CF0297	3C.2a1b.2a.2a.1
22CF0304	3C.2a1b.2a.2a.1
22CF0306	3C.2a1b.2a.2a.1
22CF0309	3C.2a1b.2a.2a.1
22CF0313	3C.2a1b.2a.2a.1
22CF0322	3C.2a1b.2a.2a.1
22CF0326	3C.2a1b.2a.2a.1
22CF0329	3C.2a1b.2a.2a.1
22CF0334	3C.2a1b.2a.2a.1
22CF0336	3C.2a1b.2a.2a.1
22CF0341	3C.2a1b.2a.2a.1
22CF0342	3C.2a1b.2a.2a.1
22CF0343	3C.2a1b.2a.2a.1
22CF0347	3C.2a1b.2a.2a.1
22CF0355	3C.2a1b.2a.2a.1
22CF0358	3C.2a1b.2a.2a.1
22CF0370	3C.2a1b.2a.2a.1
22CF0371	3C.2a1b.2a.2a.1
22CF0372	3C.2a1b.2a.2a.1
22CF0376	3C.2a1b.2a.2a.1
22CF0380	3C.2a1b.2a.2a.1
22CF0412	3C.2a1b.2a.2a.1
22CF0426	3C.2a1b.2a.2a.1
22CF0431	3C.2a1b.2a.2a.1
22CF0449	3C.2a1b.2a.2a.1
22CF0475	3C.2a1b.2a.2a.1
22HB0071	3C.2a1b.2a.2a.1
22HH4370	3C.2a1b.2a.2a.1
22HH4371	3C.2a1b.2a.2a.1
22HH4630	3C.2a1b.2a.2a.1
22HH4632	3C.2a1b.2a.2a.1
22HH4802	3C.2a1b.2a.2a.1
22HH5311	3C.2a1b.2a.2a.1
22HH5343	3C.2a1b.2a.2a.1
22HH5344	3C.2a1b.2a.2a.1
22HH5345	3C.2a1b.2a.2a.1
22HH5350	3C.2a1b.2a.2a.1
22HH5408	3C.2a1b.2a.2a.1
22HH5409	3C.2a1b.2a.2a.1
22HH5483	3C.2a1b.2a.2a.1
22HH5675	3C.2a1b.2a.2a.1
22HH5713	3C.2a1b.2a.2a.1
22HH5757	3C.2a1b.2a.2a.1
22HH5758	3C.2a1b.2a.2a.1
22HH5770	3C.2a1b.2a.2a.1
22HH5772	3C.2a1b.2a.2a.1
22HH5864	3C.2a1b.2a.2a.1
22HH5868	3C.2a1b.2a.2a.1
22HH5869	3C.2a1b.2a.2a.1
22HH5873	3C.2a1b.2a.2a.1
22HH5876	3C.2a1b.2a.2a.1
22HH5972	3C.2a1b.2a.2a.1
22HH5995	3C.2a1b.2a.2a.1
22HH6001	3C.2a1b.2a.2a.1
22HH6010	3C.2a1b.2a.2a.1
22HH6032	3C.2a1b.2a.2a.1
22HH6042	3C.2a1b.2a.2a.1
22HH6085	3C.2a1b.2a.2a.1
22HH6138	3C.2a1b.2a.2a.1
22HH6147	3C.2a1b.2a.2a.1
22HH6158	3C.2a1b.2a.2a.1
22HH6159	3C.2a1b.2a.2a.1
22HH6161	3C.2a1b.2a.2a.1
22HH6162	3C.2a1b.2a.2a.1
22HH6230	3C.2a1b.2a.2a.1
22HH6233	3C.2a1b.2a.2a.1
22HH6234	3C.2a1b.2a.2a.1
22HH6235	3C.2a1b.2a.2a.1
22HH6239	3C.2a1b.2a.2a.1
22HH6240	3C.2a1b.2a.2a.1
22HH6245	3C.2a1b.2a.2a.1
22HH6253	3C.2a1b.2a.2a.1
22HH6410	3C.2a1b.2a.2a.1
22HH6423	3C.2a1b.2a.2a.1
22HH6426	3C.2a1b.2a.2a.1
22HH6497	3C.2a1b.2a.2a.1
22HH6501	3C.2a1b.2a.2a.1
22HH6504	3C.2a1b.2a.2a.1
22HH6512	3C.2a1b.2a.2a.1
22HH6513	3C.2a1b.2a.2a.1
22HH6518	3C.2a1b.2a.2a.1
22HH6521	3C.2a1b.2a.2a.1
22HH6549	3C.2a1b.2a.2a.1
22HH6592	3C.2a1b.2a.2a.1
22HH6594	3C.2a1b.2a.2a.1
22HH6602	3C.2a1b.2a.2a.1
22HH6604	3C.2a1b.2a.2a.1
22HH6605	3C.2a1b.2a.2a.1
22HH6607	3C.2a1b.2a.2a.1
22HH6608	3C.2a1b.2a.2a.1
22HH6609	3C.2a1b.2a.2a.1
22HH6610	3C.2a1b.2a.2a.1
22HH6611	3C.2a1b.2a.2a.1
22HH6620	3C.2a1b.2a.2a.1
22HH6625	3C.2a1b.2a.2a.1
22HH6645	3C.2a1b.2a.2a.1
22HH6662	3C.2a1b.2a.2a.1
22HH6669	3C.2a1b.2a.2a.1
22HH6713	3C.2a1b.2a.2a.1
22HH6716	3C.2a1b.2a.2a.1
22HH6752	3C.2a1b.2a.2a.1
22HH6759	3C.2a1b.2a.2a.1
22HH6763	3C.2a1b.2a.2a.1
22HH6764	3C.2a1b.2a.2a.1
22HH6767	3C.2a1b.2a.2a.1
22HH6769	3C.2a1b.2a.2a.1
22HH6772	3C.2a1b.2a.2a.1
22HH6774	3C.2a1b.2a.2a.1
22HH6775	3C.2a1b.2a.2a.1
22HH6778	3C.2a1b.2a.2a.1
22HH6791	3C.2a1b.2a.2a.1
22HH6797	3C.2a1b.2a.2a.1
22HH6798	3C.2a1b.2a.2a.1
22HH6812	3C.2a1b.2a.2a.1
22HH6836	3C.2a1b.2a.2a.1
22HH6965	3C.2a1b.2a.2a.1
22HH6966	3C.2a1b.2a.2a.1
22HH6967	3C.2a1b.2a.2a.1
22HH6969	3C.2a1b.2a.2a.1
22HH6972	3C.2a1b.2a.2a.1
22HH6975	3C.2a1b.2a.2a.1
22HH6977	3C.2a1b.2a.2a.1
22HH6979	3C.2a1b.2a.2a.1
22HH6980	3C.2a1b.2a.2a.1
22HH6986	3C.2a1b.2a.2a.1
22HH6987	3C.2a1b.2a.2a.1
22HH6999	3C.2a1b.2a.2a.1
22HH7017	3C.2a1b.2a.2a.1
22HH7020	3C.2a1b.2a.2a.1
22HH7050	3C.2a1b.2a.2a.1
22HH7052	3C.2a1b.2a.2a.1
22HH7053	3C.2a1b.2a.2a.1
22HH7055	3C.2a1b.2a.2a.1
22HH7056	3C.2a1b.2a.2a.1
22HH7057	3C.2a1b.2a.2a.1
22HH7060	3C.2a1b.2a.2a.1
22HH7176	3C.2a1b.2a.2a.1
22HH7193	3C.2a1b.2a.2a.1
22HH7235	3C.2a1b.2a.2a.1
22HH7283	3C.2a1b.2a.2a.1
22HH7337	3C.2a1b.2a.2a.1
22HH7340	3C.2a1b.2a.2a.1
22HH7342	3C.2a1b.2a.2a.1
22HH7343	3C.2a1b.2a.2a.1
22HH7345	3C.2a1b.2a.2a.1
22HH7353	3C.2a1b.2a.2a.1
22HH7354	3C.2a1b.2a.2a.1
22HH7378	3C.2a1b.2a.2a.1
22HH7442	3C.2a1b.2a.2a.1
22VR1567	3C.2a1b.2a.2a.1
22VR1672	3C.2a1b.2a.2a.1
22VR1673	3C.2a1b.2a.2a.1
22VR1674	3C.2a1b.2a.2a.1
22VR1675	3C.2a1b.2a.2a.1
22VR1676	3C.2a1b.2a.2a.1
22VR1677	3C.2a1b.2a.2a.1
22VR1680	3C.2a1b.2a.2a.1
22VR1683	3C.2a1b.2a.2a.1
22VR1684	3C.2a1b.2a.2a.1
22VR1686	3C.2a1b.2a.2a.1
22VR1687	3C.2a1b.2a.2a.1
22VR1688	3C.2a1b.2a.2a.1
22VR1689	3C.2a1b.2a.2a.1
22VR1690	3C.2a1b.2a.2a.1
22VR1691	3C.2a1b.2a.2a.1
22VR1692	3C.2a1b.2a.2a.1
22VR1693	3C.2a1b.2a.2a.1
22VR1694	3C.2a1b.2a.2a.1
22VR1695	3C.2a1b.2a.2a.1
22VR1696	3C.2a1b.2a.2a.1
22VR1697	3C.2a1b.2a.2a.1
22VR1698	3C.2a1b.2a.2a.1
22VR1699	3C.2a1b.2a.2a.1
22VR1700	3C.2a1b.2a.2a.1
22VR1701	3C.2a1b.2a.2a.1
22VR1702	3C.2a1b.2a.2a.1
22VR1703	3C.2a1b.2a.2a.1
22VR1704	3C.2a1b.2a.2a.1
22VR1705	3C.2a1b.2a.2a.1
22VR1707	3C.2a1b.2a.2a.1
22VR1717	3C.2a1b.2a.2a.1
22VR1720	3C.2a1b.2a.2a.1
22VR1721	3C.2a1b.2a.2a.1
22VR1722	3C.2a1b.2a.2a.1
22VR1723	3C.2a1b.2a.2a.1
22VR1726	3C.2a1b.2a.2a.1
22VR1727	3C.2a1b.2a.2a.1
22VR1728	3C.2a1b.2a.2a.1
22VR1729	3C.2a1b.2a.2a.1
22VR1730	3C.2a1b.2a.2a.1
22VR1731	3C.2a1b.2a.2a.1
22VR1732	3C.2a1b.2a.2a.1
22VR1733	3C.2a1b.2a.2a.1
22VR1735	3C.2a1b.2a.2a.1
22VR1736	3C.2a1b.2a.2a.1
22VR1738	3C.2a1b.2a.2a.1
22VR1741	3C.2a1b.2a.2a.1
22VR1742	3C.2a1b.2a.2a.1
22VR1743	3C.2a1b.2a.2a.1
22VR1744	3C.2a1b.2a.2a.1
22VR1745	3C.2a1b.2a.2a.1
22VR1746	3C.2a1b.2a.2a.1
22VR1747	3C.2a1b.2a.2a.1
22VR1750	3C.2a1b.2a.2a.1
22VR1751	3C.2a1b.2a.2a.1
22VR1752	3C.2a1b.2a.2a.1
22VR1753	3C.2a1b.2a.2a.1
22VR1754	3C.2a1b.2a.2a.1
22VR1755	3C.2a1b.2a.2a.1
22VR1756	3C.2a1b.2a.2a.1
22VR1758	3C.2a1b.2a.2a.1
22VR1759	3C.2a1b.2a.2a.1
22VR1760	3C.2a1b.2a.2a.1
22VR1761	3C.2a1b.2a.2a.1
22VR1762	3C.2a1b.2a.2a.1
22VR1763	3C.2a1b.2a.2a.1
22VR1764	3C.2a1b.2a.2a.1
22VR1765	3C.2a1b.2a.2a.1
22VR1766	3C.2a1b.2a.2a.1
22VR1769	3C.2a1b.2a.2a.1
22VR1771	3C.2a1b.2a.2a.1
22VR1772	3C.2a1b.2a.2a.1
22VR1774	3C.2a1b.2a.2a.1
22VR1775	3C.2a1b.2a.2a.1
22VR1777	3C.2a1b.2a.2a.1
22VR1779	3C.2a1b.2a.2a.1
22VR1780	3C.2a1b.2a.2a.1
22VR1782	3C.2a1b.2a.2a.1
22VR1784	3C.2a1b.2a.2a.1
22VR1785	3C.2a1b.2a.2a.1
22VR1786	3C.2a1b.2a.2a.1
22VR1787	3C.2a1b.2a.2a.1
22VR1788	3C.2a1b.2a.2a.1
22VR1789	3C.2a1b.2a.2a.1
22VR1794	3C.2a1b.2a.2a.1
22VR1796	3C.2a1b.2a.2a.1
22VR1797	3C.2a1b.2a.2a.1
22VR1799	3C.2a1b.2a.2a.1
22VR1800	3C.2a1b.2a.2a.1
22VR1802	3C.2a1b.2a.2a.1
22VR1803	3C.2a1b.2a.2a.1
22VR1806	3C.2a1b.2a.2a.1
22VR1808	3C.2a1b.2a.2a.1
22VR1809	3C.2a1b.2a.2a.1
22VR1810	3C.2a1b.2a.2a.1
22VR1811	3C.2a1b.2a.2a.1
22VR1812	3C.2a1b.2a.2a.1
22VR1813	3C.2a1b.2a.2a.1
22VR1814	3C.2a1b.2a.2a.1
22VR1815	3C.2a1b.2a.2a.1
22VR1816	3C.2a1b.2a.2a.1
22VR1817	3C.2a1b.2a.2a.1
22VR1818	3C.2a1b.2a.2a.1
22VR1819	3C.2a1b.2a.2a.1
22VR1820	3C.2a1b.2a.2a.1
22VR1822	3C.2a1b.2a.2a.1
22VR1823	3C.2a1b.2a.2a.1
22VR1824	3C.2a1b.2a.2a.1
22VR1825	3C.2a1b.2a.2a.1
22VR1826	3C.2a1b.2a.2a.1
22VR1827	3C.2a1b.2a.2a.1
22VR1831	3C.2a1b.2a.2a.1
22VR1833	3C.2a1b.2a.2a.1
22VR1835	3C.2a1b.2a.2a.1
22VR1836	3C.2a1b.2a.2a.1
22VR1837	3C.2a1b.2a.2a.1
22VR1838	3C.2a1b.2a.2a.1
22VR1839	3C.2a1b.2a.2a.1
22VR1840	3C.2a1b.2a.2a.1
22VR1841	3C.2a1b.2a.2a.1
22VR1842	3C.2a1b.2a.2a.1
22VR1843	3C.2a1b.2a.2a.1
22VR1844	3C.2a1b.2a.2a.1
22VR1845	3C.2a1b.2a.2a.1
22VR1847	3C.2a1b.2a.2a.1
22VR1849	3C.2a1b.2a.2a.1
22VR1850	3C.2a1b.2a.2a.1
22VR1852	3C.2a1b.2a.2a.1
22VR1853	3C.2a1b.2a.2a.1
22VR1855	3C.2a1b.2a.2a.1
22VR1858	3C.2a1b.2a.2a.1
22VR1860	3C.2a1b.2a.2a.1
22VR1861	3C.2a1b.2a.2a.1
22VR1862	3C.2a1b.2a.2a.3
22VR1863	3C.2a1b.2a.2a.1
22VR1866	3C.2a1b.2a.2a.1
22VR1867	3C.2a1b.2a.2a.1
22VR1868	3C.2a1b.2a.2a.1
22VR1869	3C.2a1b.2a.2a.1
22VR1871	3C.2a1b.2a.2a.1
22VR1872	3C.2a1b.2a.2a.1
22VR1874	3C.2a1b.2a.2a.1
22VR1875	3C.2a1b.2a.2a.1
22VR1876	3C.2a1b.2a.2a.1
22VR1877	3C.2a1b.2a.2a.1
22VR1878	3C.2a1b.2a.2a.1
22VR1880	3C.2a1b.2a.2a.1
22VR1881	3C.2a1b.2a.2a.1
22VR1882	3C.2a1b.2a.2a.1
22VR1883	3C.2a1b.2a.2a.1
22VR1886	3C.2a1b.2a.2a.1
22VR1888	3C.2a1b.2a.2a.1
22VR1890	3C.2a1b.2a.2a.1
22VR1891	3C.2a1b.2a.2a.1
22VR1892	3C.2a1b.2a.2a.1
22VR1893	3C.2a1b.2a.2a.1
22VR1895	3C.2a1b.2a.2a.1
22VR1896	3C.2a1b.2a.2a.1
22VR1897	3C.2a1b.2a.2a.1
22VR1898	3C.2a1b.2a.2a.1
22VR1900	3C.2a1b.2a.2a.1
22VR1901	3C.2a1b.2a.2a.1
22VR1903	3C.2a1b.2a.2a.1
22VR1904	3C.2a1b.2a.2a.1
22VR1905	3C.2a1b.2a.2a.1
22VR1906	3C.2a1b.2a.2a.1
22VR1907	3C.2a1b.2a.2a.1
22VR1908	3C.2a1b.2a.2a.1
22VR1910	3C.2a1b.2a.2a.1
22VR1911	3C.2a1b.2a.2a.1
22VR1913	3C.2a1b.2a.2a.1
22VR1917	3C.2a1b.2a.2a.1
22VR1918	3C.2a1b.2a.2a.1
22VR1919	3C.2a1b.2a.2a.1
22VR1922	3C.2a1b.2a.2a.1
22VR1923	3C.2a1b.2a.2a.1
22VR1927	3C.2a1b.2a.2a.1
22VR1931	3C.2a1b.2a.2a.1
22VR1932	3C.2a1b.2a.2a.1
22VR1933	3C.2a1b.2a.2a.1
22VR1935	3C.2a1b.2a.2a.1
22VR1936	3C.2a1b.2a.2a.1
22VR1938	3C.2a1b.2a.2a.1
22VR1939	3C.2a1b.2a.2a.1
22VR1940	3C.2a1b.2a.2a.1
22VR1942	3C.2a1b.2a.2a.1
22VR1943	3C.2a1b.2a.2a.1
22VR1944	3C.2a1b.2a.2a.1
22VR1947	3C.2a1b.2a.2a.1
22VR1949	3C.2a1b.2a.2a.1
22VR1950	3C.2a1b.2a.2a.1
22VR1951	3C.2a1b.2a.2a.1
22VR1952	3C.2a1b.2a.2a.1
22VR1953	3C.2a1b.2a.2a.1
22VR1954	3C.2a1b.2a.2a.1
22VR1956	3C.2a1b.2a.2a.3
22VR1957	3C.2a1b.2a.2a.1
22VR1958	3C.2a1b.2a.2a.1
22VR1961	3C.2a1b.2a.2a.1
22VR1962	3C.2a1b.2a.2a.1
22VR1963	3C.2a1b.2a.2a.1
22VR1964	3C.2a1b.2a.2a.1
22VR1965	3C.2a1b.2a.2a.1
22VR1966	3C.2a1b.2a.2a.1
22VR1967	3C.2a1b.2a.2a.1
22VR1968	3C.2a1b.2a.2a.1
22VR1970	3C.2a1b.2a.2a.1
22VR1974	3C.2a1b.2a.2a.1
22VR1977	3C.2a1b.2a.2a.1
22VR1979	3C.2a1b.2a.2a.1
22VR1984	3C.2a1b.2a.2a.1
22VR1985	3C.2a1b.2a.2a.1
22VR1986	3C.2a1b.2a.2a.1
22VR1987	3C.2a1b.2a.2a.1
22VR1988	3C.2a1b.2a.2a.1
22VR1989	3C.2a1b.2a.2a.1
22VR1991	3C.2a1b.2a.2a.1
22VR1992	3C.2a1b.2a.2a.1
22VR1994	3C.2a1b.2a.2a.1
22VR1995	3C.2a1b.2a.2a.1
22VR1996	3C.2a1b.2a.2a.1
22VR1997	3C.2a1b.2a.2a.1
22VR1999	3C.2a1b.2a.2a.1
22VR2000	3C.2a1b.2a.2a.1
22VR2001	3C.2a1b.2a.2a.1
22VR2003	3C.2a1b.2a.2a.1
22VR2004	3C.2a1b.2a.2a.1
22VR2008	3C.2a1b.2a.2a.1
22VR2010	3C.2a1b.2a.2a.1
22VR2011	3C.2a1b.2a.2a.1
22VR2012	3C.2a1b.2a.2a.1
22VR2013	3C.2a1b.2a.2a.1
22VR2014	3C.2a1b.2a.2a.1
22VR2015	3C.2a1b.2a.2a.1
22VR2016	3C.2a1b.2a.2a.1
22VR2017	3C.2a1b.2a.2a.1
22VR2018	3C.2a1b.2a.2a.1
22VR2020	3C.2a1b.2a.2a.1
22VR2021	3C.2a1b.2a.2a.1
22VR2022	3C.2a1b.2a.2a.1
22VR2024	3C.2a1b.2a.2a.1
22VR2027	3C.2a1b.2a.2a.1
22VR2029	3C.2a1b.2a.2a.1
22VR2032	3C.2a1b.2a.2a.1
22VR2033	3C.2a1b.2a.2a.1
22VR2034	3C.2a1b.2a.2a.1
22VR2035	3C.2a1b.2a.2a.1
22VR2039	3C.2a1b.2a.2a.1
22VR2040	3C.2a1b.2a.2a.1
22VR2041	3C.2a1b.2a.2a.1
22VR2042	3C.2a1b.2a.2a.1
22VR2043	3C.2a1b.2a.2a.1
22VR2044	3C.2a1b.2a.2a.1
22VR2045	3C.2a1b.2a.2a.1
22VR2046	3C.2a1b.2a.2a.1
22VR2047	3C.2a1b.2a.2a.1
22VR2049	3C.2a1b.2a.2a.1
22VR2050	3C.2a1b.2a.2a.1
22VR2052	3C.2a1b.2a.2a.1
22VR2053	3C.2a1b.2a.2a.1
22VR2054	3C.2a1b.2a.2a.1
22VR2056	3C.2a1b.2a.2a.1
22VR2057	3C.2a1b.2a.2a.1
22VR2062	3C.2a1b.2a.2a.1
22VR2063	3C.2a1b.2a.2a.1
22VR2065	3C.2a1b.2a.2a.1
22VR2070	3C.2a1b.2a.2a.1
22VR2071	3C.2a1b.2a.2a.1
22VR2073	3C.2a1b.2a.2a.1
22VR2074	3C.2a1b.2a.2a.1
22VR2075	3C.2a1b.2a.2a.1
22VR2076	3C.2a1b.2a.2a.1
22VR2077	3C.2a1b.2a.2a.1
22VR2078	3C.2a1b.2a.2a.1
22VR2079	3C.2a1b.2a.2a.1
22VR2080	3C.2a1b.2a.2a.1
22VR2081	3C.2a1b.2a.2a.1
22VR2082	3C.2a1b.2a.2a.1
22VR2083	3C.2a1b.2a.2a.1
22VR2087	3C.2a1b.2a.2a.1
22VR2089	3C.2a1b.2a.2a.1
22VR2090	3C.2a1b.2a.2a.1
22VR2091	3C.2a1b.2a.2a.1
22VR2093	3C.2a1b.2a.2a.1
22VR2094	3C.2a1b.2a.2a.1
22VR2095	3C.2a1b.2a.2a.1
22VR2096	3C.2a1b.2a.2a.1
22VR2099	3C.2a1b.2a.2a.1
22VR2100	3C.2a1b.2a.2a.1
22VR2101	3C.2a1b.2a.2a.1
22VR2103	3C.2a1b.2a.2a.1
22VR2105	3C.2a1b.2a.2a.1
22VR2106	3C.2a1b.2a.2a.1
22VR2110	3C.2a1b.2a.2a.1
22VR2112	3C.2a1b.2a.2a.1
22VR2113	3C.2a1b.2a.2a.1
22VR2118	3C.2a1b.2a.2a.1
22VR2120	3C.2a1b.2a.2a.1
22VR2122	3C.2a1b.2a.2a.1
22VR2123	3C.2a1b.2a.2a.1
22VR2124	3C.2a1b.2a.2a.1
22VR2125	3C.2a1b.2a.2a.1
22VR2126	3C.2a1b.2a.2a.1
22VR2127	3C.2a1b.2a.2a.1
22VR2129	3C.2a1b.2a.2a.1
22VR2130	3C.2a1b.2a.2a.1
22VR2133	3C.2a1b.2a.2a.1
22VR2135	3C.2a1b.2a.2a.1
22VR2137	3C.2a1b.2a.2a.1
22VR2139	3C.2a1b.2a.2a.1
22VR2140	3C.2a1b.2a.2a.1
22VR2142	3C.2a1b.2a.2a.1
22VR2144	3C.2a1b.2a.2a.1
22VR2145	3C.2a1b.2a.2a.1
22VR2146	3C.2a1b.2a.2a.1
22VR2147	3C.2a1b.2a.2a.1
22VR2149	3C.2a1b.2a.2a.1
22VR2150	3C.2a1b.2a.2a.1
22VR2151	3C.2a1b.2a.2a.1
22VR2152	3C.2a1b.2a.2a.1
22VR2153	3C.2a1b.2a.2a.1
22VR2155	3C.2a1b.2a.2a.1
22VR2156	3C.2a1b.2a.2a.1
22VR2157	3C.2a1b.2a.2a.1
22VR2158	3C.2a1b.2a.2a.1
22VR2159	3C.2a1b.2a.2a.1
22VR2160	3C.2a1b.2a.2a.1
22VR2161	3C.2a1b.2a.2a.1
22VR2162	3C.2a1b.2a.2a.1
22VR2163	3C.2a1b.2a.2a.1
22VR2164	3C.2a1b.2a.2a.1
22VR2165	3C.2a1b.2a.2a.1
22VR2167	3C.2a1b.2a.2a.1
22VR2168	3C.2a1b.2a.2a.1
22VR2169	3C.2a1b.2a.2a.1
22VR2170	3C.2a1b.2a.2a.1
22VR2171	3C.2a1b.2a.2a.1
22VR2174	3C.2a1b.2a.2a.1
22VR2175	3C.2a1b.2a.2a.1
22VR2177	3C.2a1b.2a.2a.1
22VR2178	3C.2a1b.2a.2a.1
22VR2179	3C.2a1b.2a.2a.1
22VR2183	3C.2a1b.2a.2a.1
22VR2184	3C.2a1b.2a.2a.1
22VR2186	3C.2a1b.2a.2a.1
22VR2187	3C.2a1b.2a.2a.1
22VR2188	3C.2a1b.2a.2a.1
22VR2189	3C.2a1b.2a.2a.1
22VR2191	3C.2a1b.2a.2a.1
22VR2192	3C.2a1b.2a.2a.1
22VR2193	3C.2a1b.2a.2a.1
22VR2196	3C.2a1b.2a.2a.1
22VR2198	3C.2a1b.2a.2a.1
22VR2199	3C.2a1b.2a.2a.1
22VR2201	3C.2a1b.2a.2a.1
22VR2202	3C.2a1b.2a.2a.1
22VR2205	3C.2a1b.2a.2a.1
22VR2208	3C.2a1b.2a.2a.1
22VR2210	3C.2a1b.2a.2a.1
22VR2211	3C.2a1b.2a.2a.1
22VR2213	3C.2a1b.2a.2a.1
22VR2214	3C.2a1b.2a.2a.1
22VR2215	3C.2a1b.2a.2a.1
22VR2216	3C.2a1b.2a.2a.1
22VR2218	3C.2a1b.2a.2a.1
22VR2219	3C.2a1b.2a.2a.1
22VR2220	3C.2a1b.2a.2a.1
22VR2222	3C.2a1b.2a.2a.1
22VR2223	3C.2a1b.2a.2a.1
22VR2225	3C.2a1b.2a.2a.1
22VR2226	3C.2a1b.2a.2a.1
22VR2228	3C.2a1b.2a.2a.1
22VR2229	3C.2a1b.2a.2a.1
22VR2230	3C.2a1b.2a.2a.1
22VR2232	3C.2a1b.2a.2a.1
22VR2233	3C.2a1b.2a.2a.1
22VR2234	3C.2a1b.2a.2a.1
22VR2236	3C.2a1b.2a.2a.1
22VR2237	3C.2a1b.2a.2a.1
22VR2238	3C.2a1b.2a.2a.1
22VR2239	3C.2a1b.2a.2a.1
22VR2241	3C.2a1b.2a.2a.1
22VR2251	3C.2a1b.2a.2a.1
22VR2252	3C.2a1b.2a.2a.1
22VR2253	3C.2a1b.2a.2a.1
22VR2254	3C.2a1b.2a.2a.1
22VR2256	3C.2a1b.2a.2a.1
22VR2257	3C.2a1b.2a.2a.1
22VR2258	3C.2a1b.2a.2a.1
22VR2261	3C.2a1b.2a.2a.1
22VR2262	3C.2a1b.2a.2a.1
22VR2265	3C.2a1b.2a.2a.1
22VR2270	3C.2a1b.2a.2a.1
22VR2272	3C.2a1b.2a.2a.1
22VR2274	3C.2a1b.2a.2a.1
22VR2275	3C.2a1b.2a.2a.1
22VR2276	3C.2a1b.2a.2a.1
22VR2278	3C.2a1b.2a.2a.1
22VR2279	3C.2a1b.2a.2a.1
22VR2280	3C.2a1b.2a.2a.1
22VR2286	3C.2a1b.2a.2a.1
22VR2287	3C.2a1b.2a.2a.1
22VR2288	3C.2a1b.2a.2a.1
22VR2292	3C.2a1b.2a.2a.1
22VR2293	3C.2a1b.2a.2a.1
22VR2294	3C.2a1b.2a.2a.1
22VR2295	3C.2a1b.2a.2a.1
22VR2296	3C.2a1b.2a.2a.1
22VR2297	3C.2a1b.2a.2a.1
22VR2298	3C.2a1b.2a.2a.1
22VR2299	3C.2a1b.2a.2a.1
22VR2323	3C.2a1b.2a.2a.1
22VR2324	3C.2a1b.2a.2a.1
22VR2327	3C.2a1b.2a.2a.1
22VR2328	3C.2a1b.2a.2a.1
22VR2340	3C.2a1b.2a.2a.1
22VR2342	3C.2a1b.2a.2a.1
22VR2344	3C.2a1b.2a.2a.1
22VR2349	3C.2a1b.2a.2a.1
22VR2357	3C.2a1b.2a.2a.1
22VR2358	3C.2a1b.2a.2a.1
22VR2359	3C.2a1b.2a.2a.1
22VR2381	3C.2a1b.2a.2a.1
22VR2391	3C.2a1b.2a.2a.1
22VR2427	3C.2a1b.2a.2a.1
22VR2429	3C.2a1b.2a.2a.1
22VR2431	3C.2a1b.2a.2a.1
22VR2434	3C.2a1b.2a.2a.1
22VR2435	3C.2a1b.2a.2a.1
22VR2436	3C.2a1b.2a.2a.1
22VR2437	3C.2a1b.2a.2a.1
22VR2438	3C.2a1b.2a.2a.1
22VR2439	3C.2a1b.2a.2a.1
22VR2440	3C.2a1b.2a.2a.1
22VR2441	3C.2a1b.2a.2a.1
22VR2442	3C.2a1b.2a.2a.1
22VR2443	3C.2a1b.2a.2a.1
22VR2444	3C.2a1b.2a.2a.1
22VR2446	3C.2a1b.2a.2a.1
22VR2447	3C.2a1b.2a.2a.1
22VR2448	3C.2a1b.2a.2a.1
22VR2449	3C.2a1b.2a.2a.1
22VR2450	3C.2a1b.2a.2a.1
22VR2451	3C.2a1b.2a.2a.1
22VR2452	3C.2a1b.2a.2a.1
22VR2454	3C.2a1b.2a.2a.1
22VR2456	3C.2a1b.2a.2a.1
22VR2457	3C.2a1b.2a.2a.1
22VR2458	3C.2a1b.2a.2a.1
22VR2459	3C.2a1b.2a.2a.1
22VR2460	3C.2a1b.2a.2a.1
22VR2462	3C.2a1b.2a.2a.1
22VR2463	3C.2a1b.2a.2a.1
22VR2464	3C.2a1b.2a.2a.1
22VR2465	3C.2a1b.2a.2a.1
22VR2466	3C.2a1b.2a.2a.1
22VR2469	3C.2a1b.2a.2a.1
22VR2471	3C.2a1b.2a.2a.1
22VR2472	3C.2a1b.2a.2a.1
22VR2473	3C.2a1b.2a.2a.1
22VR2476	3C.2a1b.2a.2a.1
22VR2477	3C.2a1b.2a.2a.1
22VR2479	3C.2a1b.2a.2a.1
22VR2481	3C.2a1b.2a.2a.1
22VR2482	3C.2a1b.2a.2a.1
22VR2483	3C.2a1b.2a.2a.1
22VR2484	3C.2a1b.2a.2a.1
22VR2485	3C.2a1b.2a.2a.1
22VR2486	3C.2a1b.2a.2a.1
22VR2487	3C.2a1b.2a.2a.1
22VR2543	3C.2a1b.2a.2a.1
22VR2545	3C.2a1b.2a.2a.1
22VR2546	3C.2a1b.2a.2a.3
22VR2547	3C.2a1b.2a.2a.1
22VR2549	3C.2a1b.2a.2a.1
22VR2550	3C.2a1b.2a.2a.1
22VR2551	3C.2a1b.2a.2a.1
22VR2552	3C.2a1b.2a.2a.1
22VR2553	3C.2a1b.2a.2a.1
22VR2554	3C.2a1b.2a.2a.3
22VR2555	3C.2a1b.2a.2a.1
22VR2557	3C.2a1b.2a.2a.1
22VR2558	3C.2a1b.2a.2a.1
22VR2560	3C.2a1b.2a.2a.1
22VR2561	3C.2a1b.2a.2a.1
22VR2563	3C.2a1b.2a.2a.1
22VR2564	3C.2a1b.2a.2a.1
22VR2567	3C.2a1b.2a.2a.1
22VR2568	3C.2a1b.2a.2a.1
22VR2570	3C.2a1b.2a.2a.1
22VR2572	3C.2a1b.2a.2a.1
22VR2573	3C.2a1b.2a.2a.1
22VR2574	3C.2a1b.2a.2a.1
22VR2575	3C.2a1b.2a.2a.1
22VR2576	3C.2a1b.2a.2a.1
[truncated: 615 more rows]
