# Supplementary material for: A decade of genomic surveillance tracks the disappearance and reintroduction of seasonal influenza virus in Aotearoa New Zealand
Source: Research Square preprint supplement (doi:10.21203/rs.3.rs-7503135/v1), 2025-09-03
Supplement: Supplementary file 4 [file ee70677199420f7fef7aa7d5.xlsx]

## Sheet: Sheet1
log file	H3_2022_mono_2		Using mean values
		Central	Northern	Te_Manawa_Taki	Te_Waipounamu
	Central	0	1.79 (0.0032, 4.2321)	3.44 (0.0025, 9.4446)	2.1 (0.0123, 4.6137)
	Northern	1.78 (0.0118, 4.2153)	0	3.51 (0.5852, 6.7145)	1.29 (0.0067, 3.1866)
	Te_Manawa_Taki	3.32 (0.00091, 8.7286)	4.14 (0.4897, 8.0197)	0	3.19 (0.0464, 6.279)
	Te_Waipounamu	0.42 (0.00095, 1.22)	0.34 (0.00035, 1.1036)	0.45 (0.00035, 1.4321)	0
log file	H3_2022_mono_1_RR
		Central	Northern	Te_Manawa_Taki	Te_Waipounamu
	Central	0	0.42 (0.000034, 1.3116)	0.53 (0.0010, 1.5436)	0.57 (0.00088, 1.7568)
	Northern	1.52 (0.0011, 3.9148)	0	1.14 (0.0021, 2.8551)	1.55 (0.0178, 3.7406)
	Te_Manawa_Taki	4.68 (0.3955, 8.7785)	7.84 (3.3413, 12.4305)	0	3.2 (0.4048, 5.8371)
	Te_Waipounamu	0.36 (0.00035, 1.0504)	0.47 (0.00015, 1.2519)	0.25 (0.000042, 0.707)	0
log file	H3_2022_mono_4 and H3_2022_mono_4_RR (combined)
		Central	Northern	Te_Manawa_Taki	Te_Waipounamu
	Central	0	0.6 (0.0012, 1.6635)	1.65 (0.0019, 4.5367)	0.93 (0.00042, 2.1384)
	Northern	3.7 (0.0323, 6.3467)	0	5.33 (0.00072, 8.9762)	2.48 (0.505, 4.8224)
	Te_Manawa_Taki	0.91 (0.00054, 3.7849)	1.59 (0.0116, 7.1983)	0	1.17 (0.0015, 2.873)
	Te_Waipounamu	0.23 (0.00031, 0.7307)	0.2 (0.000055, 0.6093)	0.32 (0.00017, 0.9702)	0
