# Supplementary figures and images for: A decade of genomic surveillance tracks the disappearance and reintroduction of seasonal influenza virus in Aotearoa New Zealand
Source: Research Square preprint supplement (doi:10.21203/rs.3.rs-7503135/v1), 2025-09-03

**a**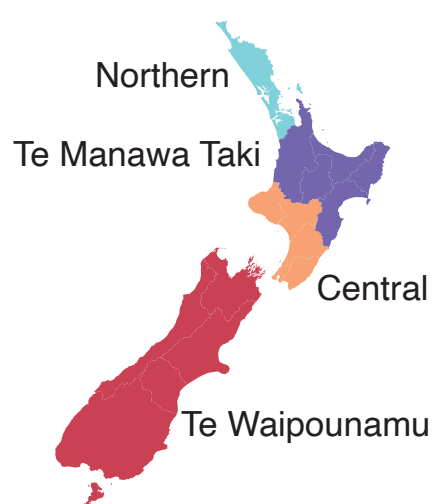**b**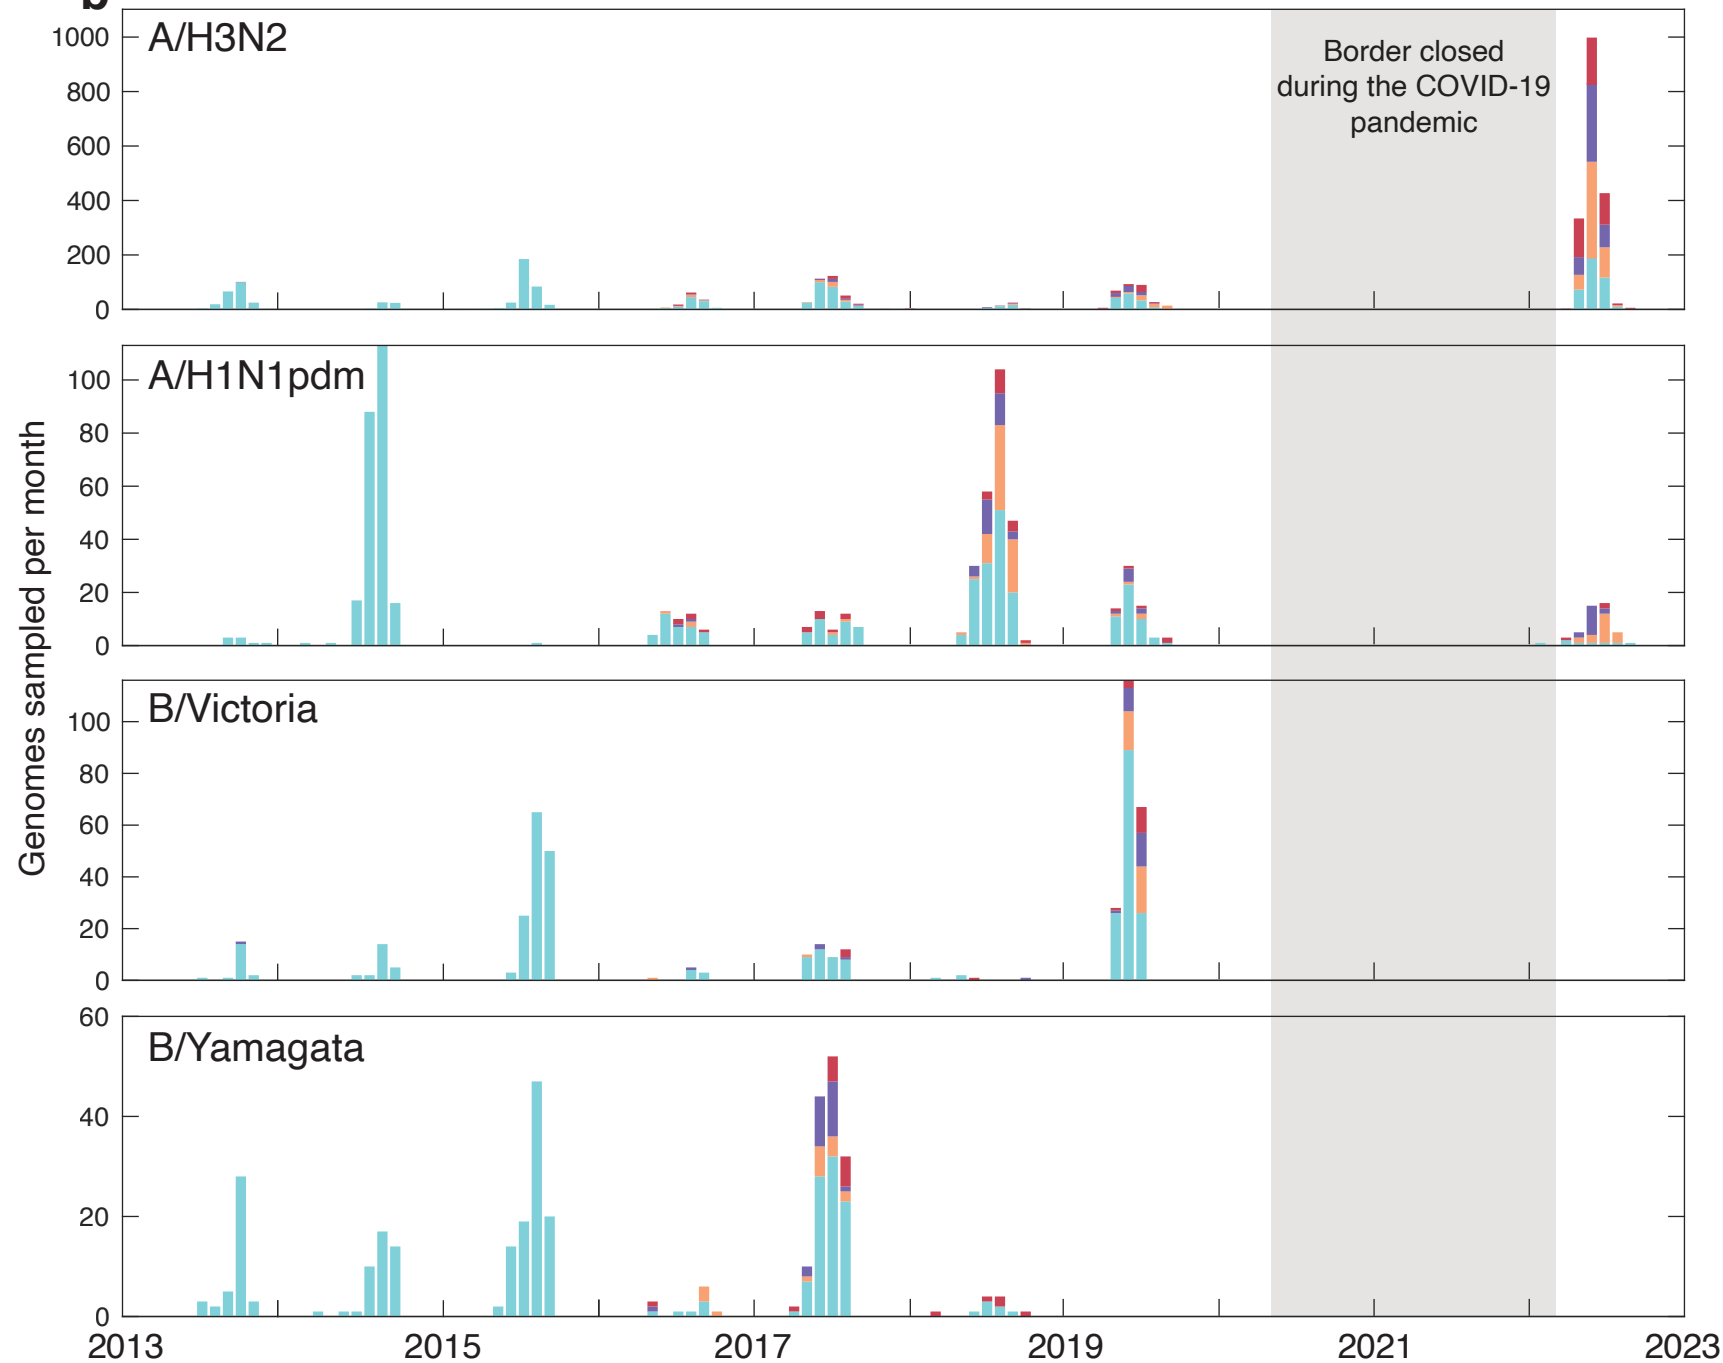

Supplement: Supplementary file 1 [file 310571e71ccdc97c7fac897d.pdf]
